# Supplementary material for: Mutational robustness changes during long-term adaptation in laboratory budding yeast populations
Source: eLife journal article supplement (doi:10.7554/elife.76491), 2022-07-26

SC 37°C

YPD 30°C

Evo. YPD 30°C  
in SC 37°C

BY x RM

in CSR1

in DPB4

in EAF1

in EBS1

in FLC2

in FUN30

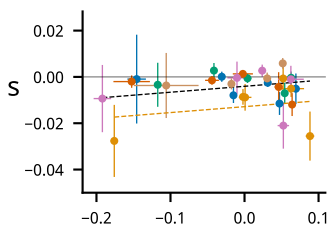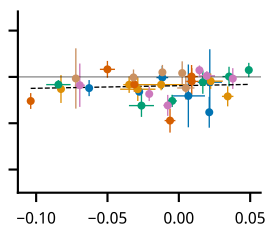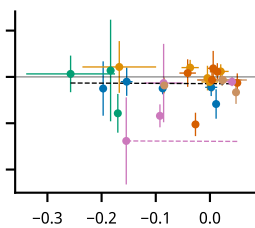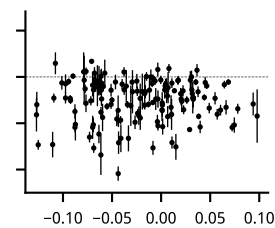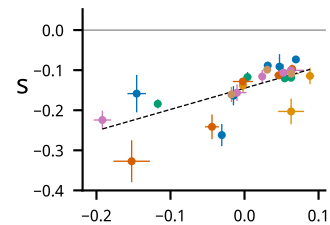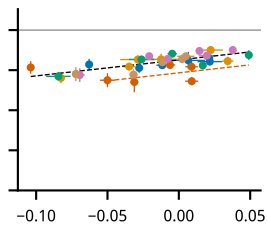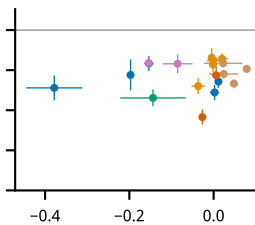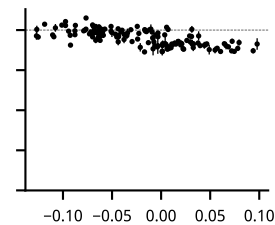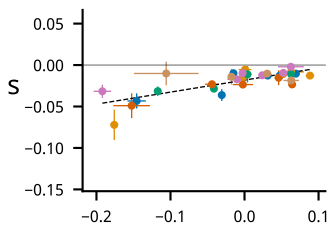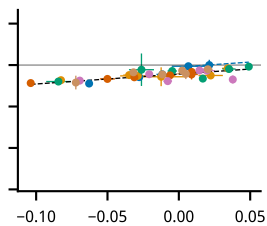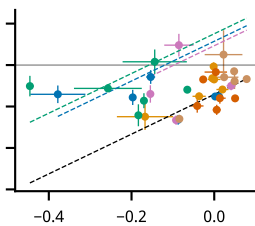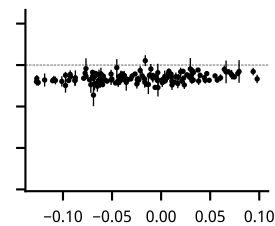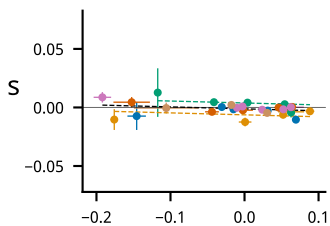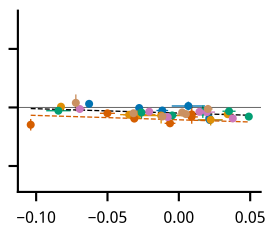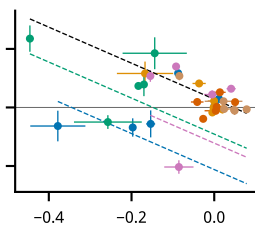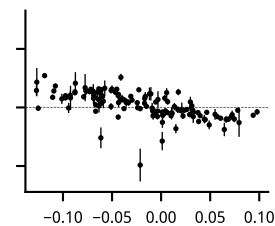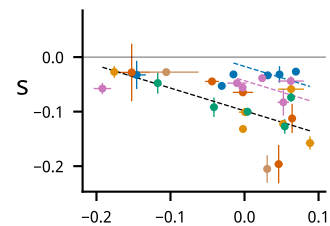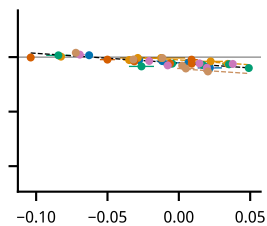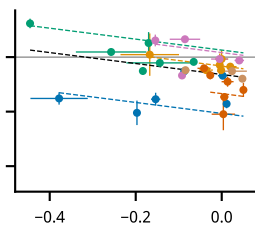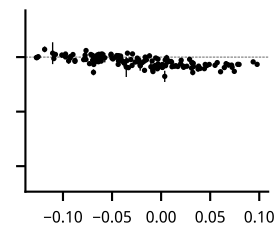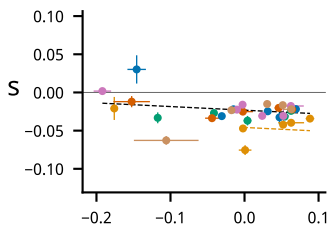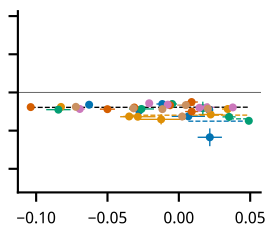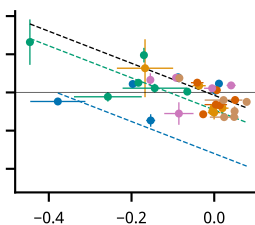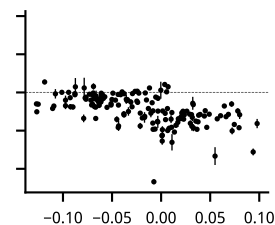

Generations

Generations

Generations

Fitness

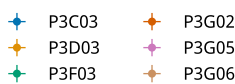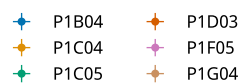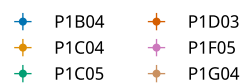

Supplement: supp [file elife-76491-supp-v1.zip]
