# Supplementary material for: Mutational robustness changes during long-term adaptation in laboratory budding yeast populations
Source: eLife journal article supplement (doi:10.7554/elife.76491), 2022-07-26
Supplement: supp [file elife-76491-supp-v1.zip]

# Evo. YPD 30°C, in SC 37°C

YPD  
30°C

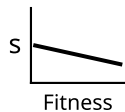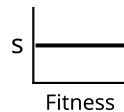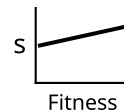

in NOP16

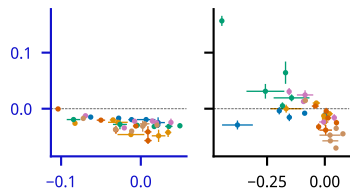

10/68 (15%) examples

in PHO4

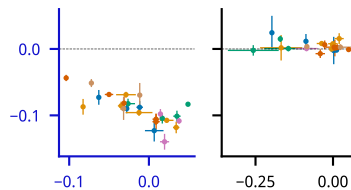

11/68 (16%) examples

in STE24

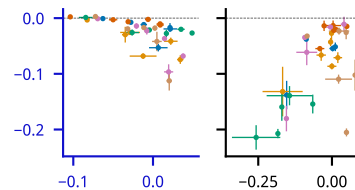

8/68 (12%) examples

in CPR6

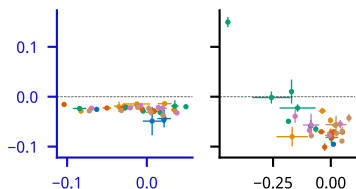

4/68 (6%) examples

in MME1

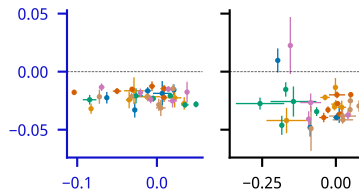

24/68 (35%) examples

in STM1

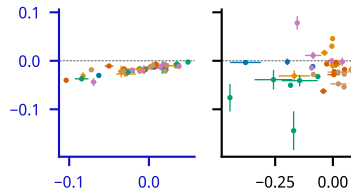

4/68 (6%) examples

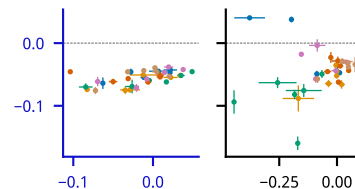

2/68 (3%) examples

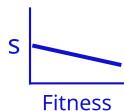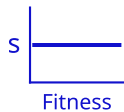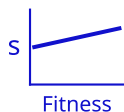

0 examples
