# Supplementary material for: Mutational robustness changes during long-term adaptation in laboratory budding yeast populations
Source: eLife journal article supplement (doi:10.7554/elife.76491), 2022-07-26

- ▮ This experiment, measurements with significant effects: 57%
- ▮ Prev experiment, measurements with significant effects: 48%

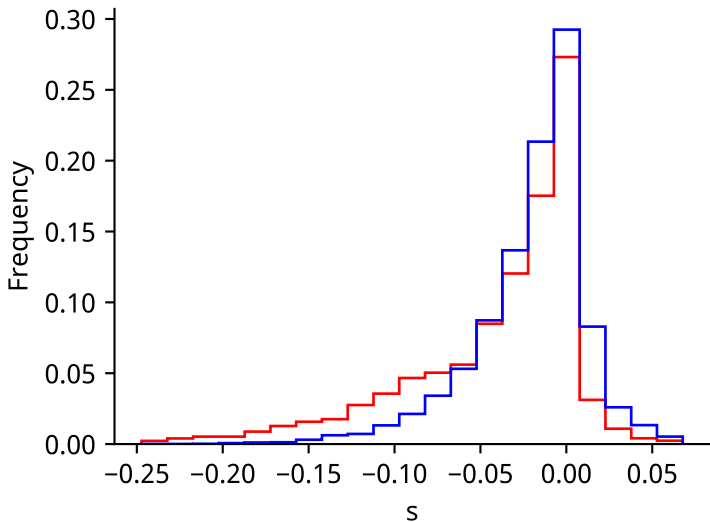

Supplement: supp [file elife-76491-supp-v1.zip]
