# Supplementary material for: Mutational robustness changes during long-term adaptation in laboratory budding yeast populations
Source: eLife journal article supplement (doi:10.7554/elife.76491), 2022-07-26

Johnson et al. (2019)

YPD 30C

DFE mean

(Slope=-0.147)

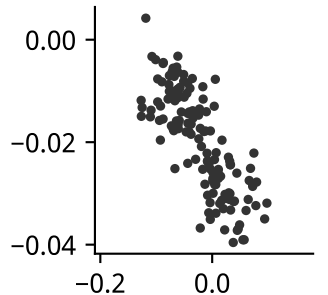

Background Fitness

YPD 30°C

DFE mean

(Slope=-0.066)

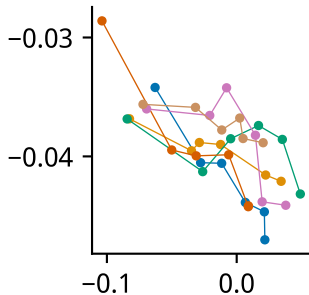

Background Fitness

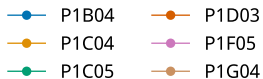

SC 37°C

DFE mean

(Slope=0.016)

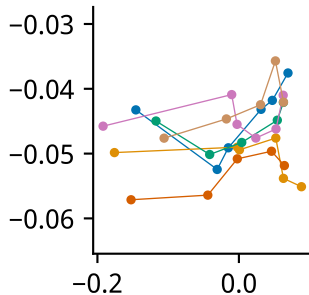

Background Fitness

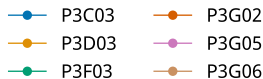

Evo. YPD 30°C  
assayed in SC 37°C

DFE mean

(Slope=-0.037)

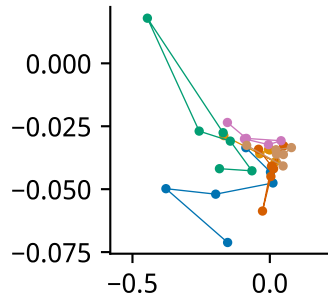

Background Fitness

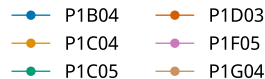

Supplement: supp [file elife-76491-supp-v1.zip]
