# Supplementary material for: Mutational robustness changes during long-term adaptation in laboratory budding yeast populations
Source: eLife journal article supplement (doi:10.7554/elife.76491), 2022-07-26
Supplement: supp [file elife-76491-supp-v1.zip]

YPD 30°C

SC 37°C

DFE mean

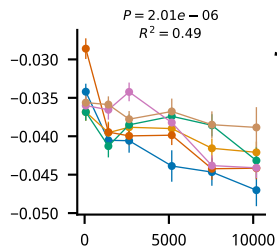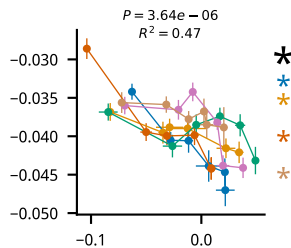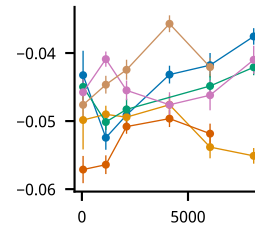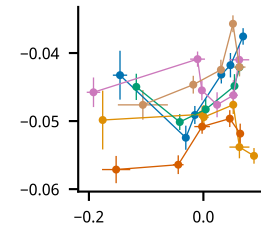DFE mean  
(limited)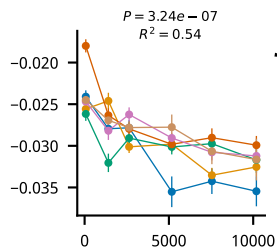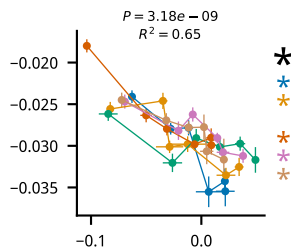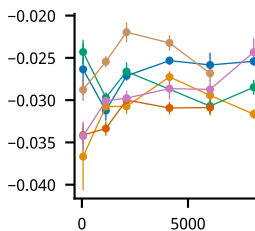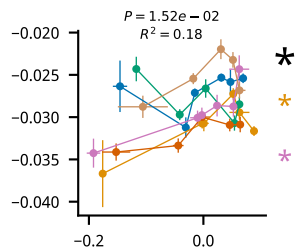DFE mean  
(filled in)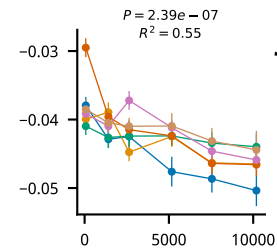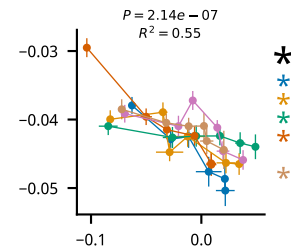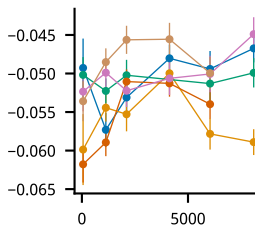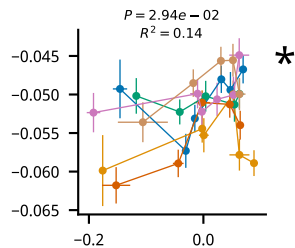# strongly deleterious  
mut. measured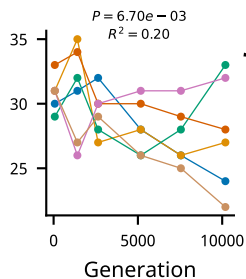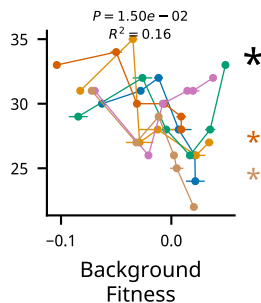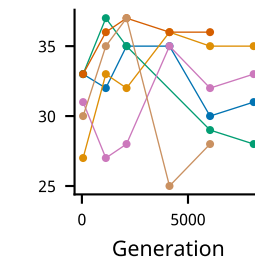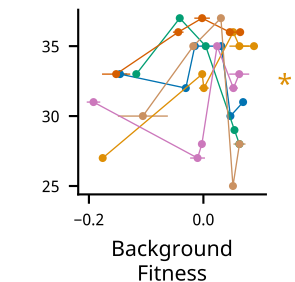

● P1B04    ● P1D03  
 ● P1C04    ● P1F05  
 ● P1C05    ● P1G04

● P3C03    ● P3G02  
 ● P3D03    ● P3G05  
 ● P3F03    ● P3G06
