# Supplementary material for: Mutational robustness changes during long-term adaptation in laboratory budding yeast populations
Source: eLife journal article supplement (doi:10.7554/elife.76491), 2022-07-26
Supplement: supp [file elife-76491-supp-v1.zip]

YPD  
30°C

BYxRM

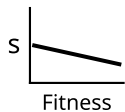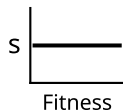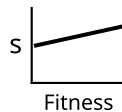

in PHO4

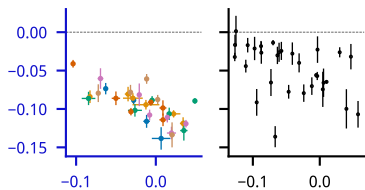

28/74 (38%) examples

in UME6

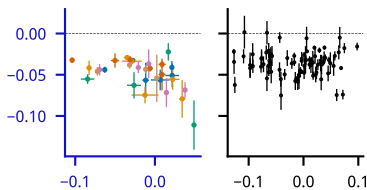

3/74 (4%) examples

0 examples

nearby RPL16A

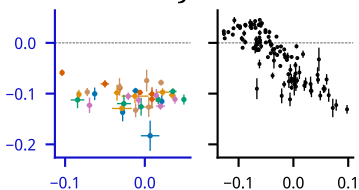

19/74 (26%) examples

in OXA1

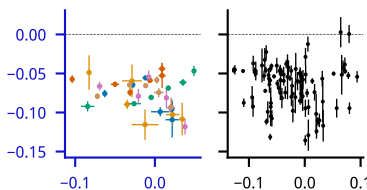

12/74 (16%) examples

in SSK1

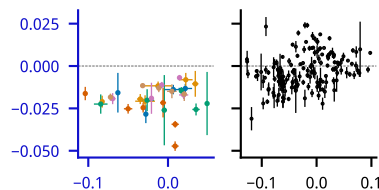

3/74 (4%) examples

in DPB4

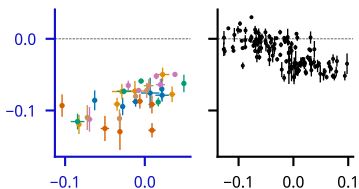

4/74 (5%) examples

in BUL1

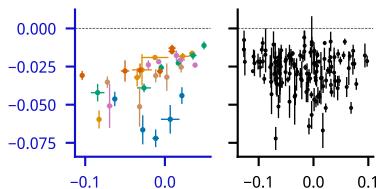

3/74 (4%) examples

nearby KRI1

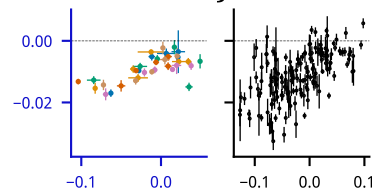

2/74 (3%) examples
