# Supplementary material for: Mutational robustness changes during long-term adaptation in laboratory budding yeast populations
Source: eLife journal article supplement (doi:10.7554/elife.76491), 2022-07-26
Supplement: supp [file elife-76491-supp-v1.zip]

SC  
37°C

BYxRM

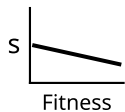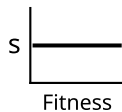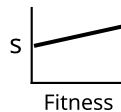

nearby CCW12

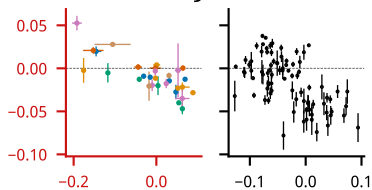

16/72 (22%) examples

0 examples

0 examples

in SIR4

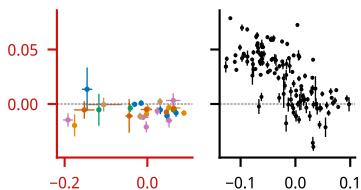

28/72 (39%) examples

in BUL1

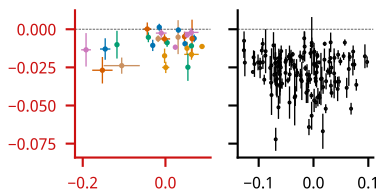

13/72 (18%) examples

in KAP123

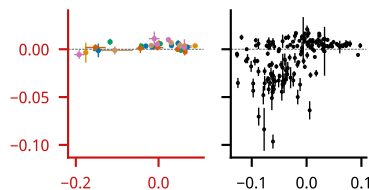

3/72 (4%) examples

in NOT3

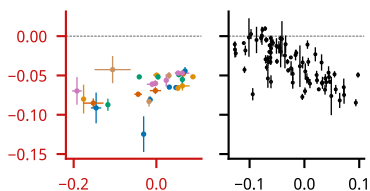

6/72 (8%) examples

in RGS2

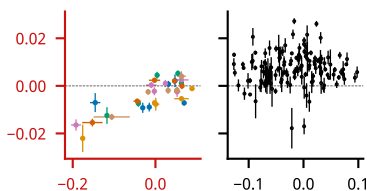

4/72 (6%) examples

in SSK1

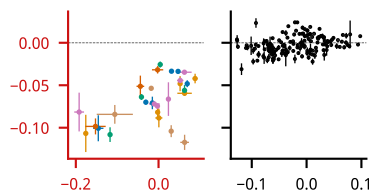

2/72 (3%) examples
