# Supplementary material for: Mutational robustness changes during long-term adaptation in laboratory budding yeast populations
Source: eLife journal article supplement (doi:10.7554/elife.76491), 2022-07-26
Supplement: supp [file elife-76491-supp-v1.zip]

SC 37°C

YPD 30°C

Evo. YPD 30°C  
in SC 37°C

BY x RM

in KAP123

in LAT1

in MAC1

in MCK1

in MME1

in MPC2

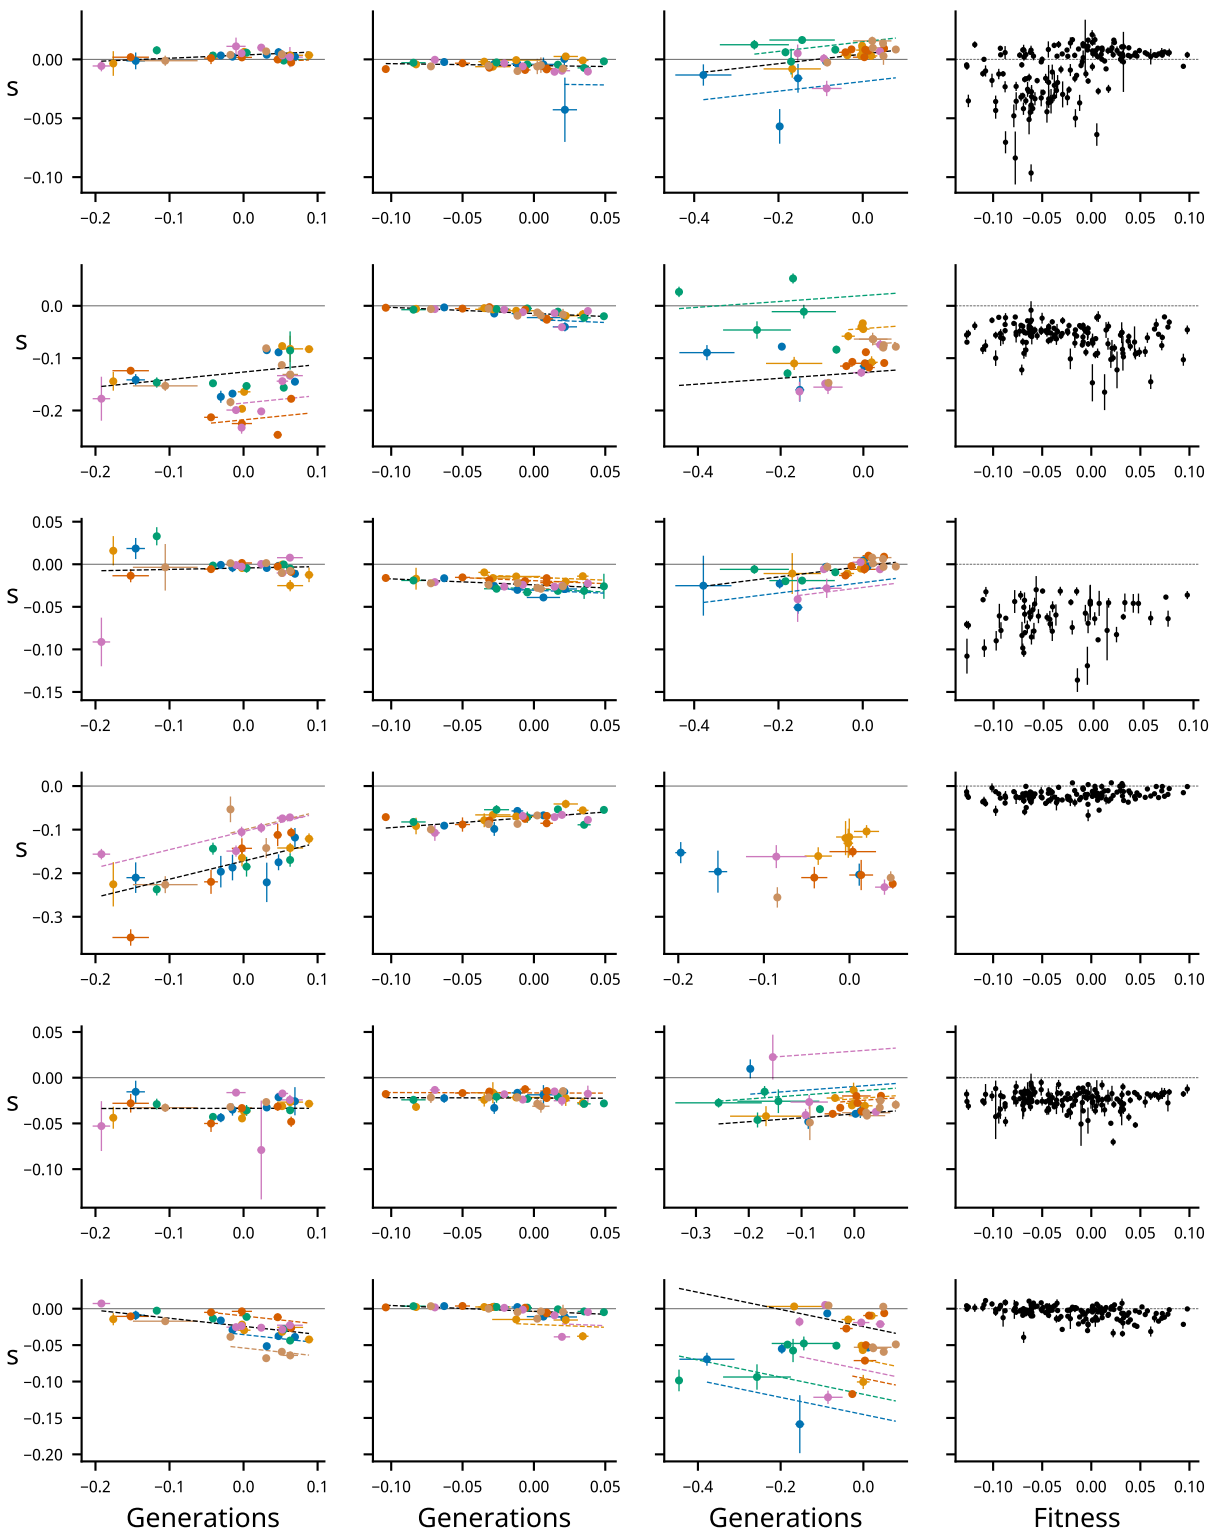

P3C03 P3G02  
P3D03 P3G05  
P3F03 P3G06

P1B04 P1D03  
P1C04 P1F05  
P1C05 P1G04

P1B04 P1D03  
P1C04 P1F05  
P1C05 P1G04
