# Supplementary material for: Mutational robustness changes during long-term adaptation in laboratory budding yeast populations
Source: eLife journal article supplement (doi:10.7554/elife.76491), 2022-07-26
Supplement: supp [file elife-76491-supp-v1.zip]

YPD  
30°C

SC 37°C

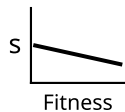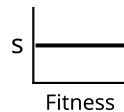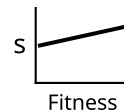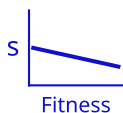

in SPT8

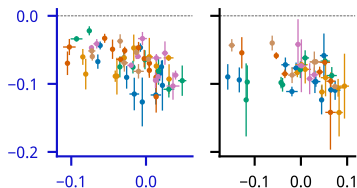

14/78 (18%) examples

in GPP1

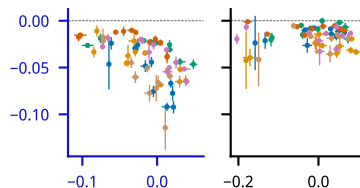

15/78 (19%) examples

in STE24

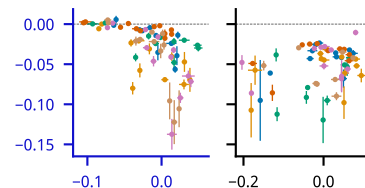

3/78 (4%) examples

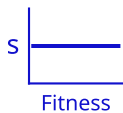

in ADE5,7

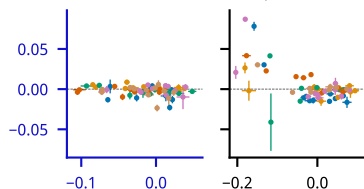

4/78 (5%) examples

in OXA1

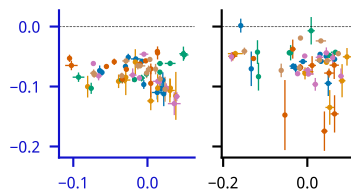

18/78 (23%) examples

in SSK1

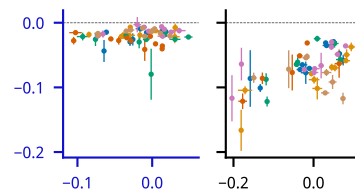

15/78 (19%) examples

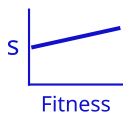

0 examples

in STM1

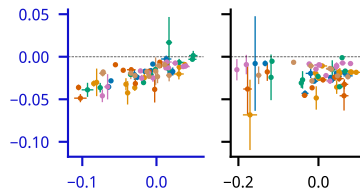

3/78 (4%) examples

in DPB4

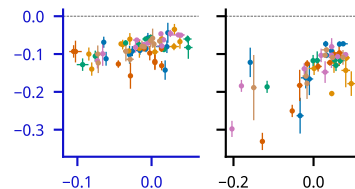

6/78 (8%) examples
