# Supplementary material for: Mutational robustness changes during long-term adaptation in laboratory budding yeast populations
Source: eLife journal article supplement (doi:10.7554/elife.76491), 2022-07-26

Real Data  
YPD 30°C

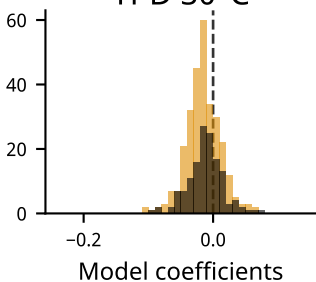

Real Data  
SC 37°C

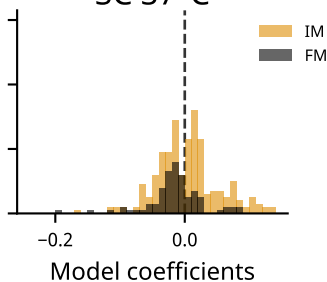

Shuffled Data  
YPD 30°C

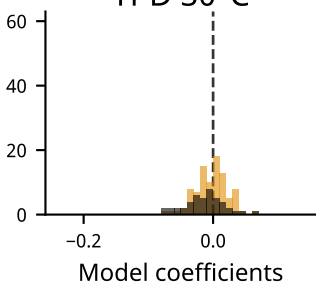

Shuffled Data  
SC 37°C

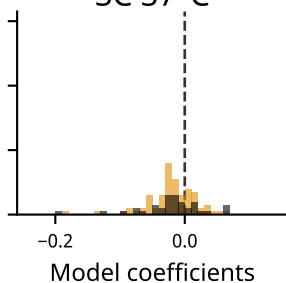

Simulated Data  
YPD 30°C

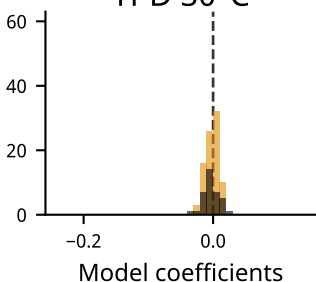

Simulated Data  
SC 37°C

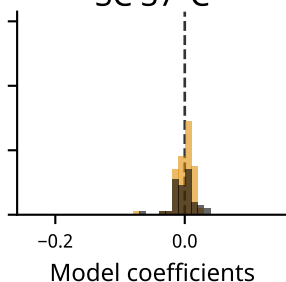

Supplement: supp [file elife-76491-supp-v1.zip]
