# Supplementary material for: Mutational robustness changes during long-term adaptation in laboratory budding yeast populations
Source: eLife journal article supplement (doi:10.7554/elife.76491), 2022-07-26
Supplement: supp [file elife-76491-supp-v1.zip]

SC 37°C

YPD 30°C

Evo. YPD 30°C  
in SC 37°C

BY x RM

in RPS14B

in RRP46

in RSC30

in RTG1

in SCJ1

in SIR3

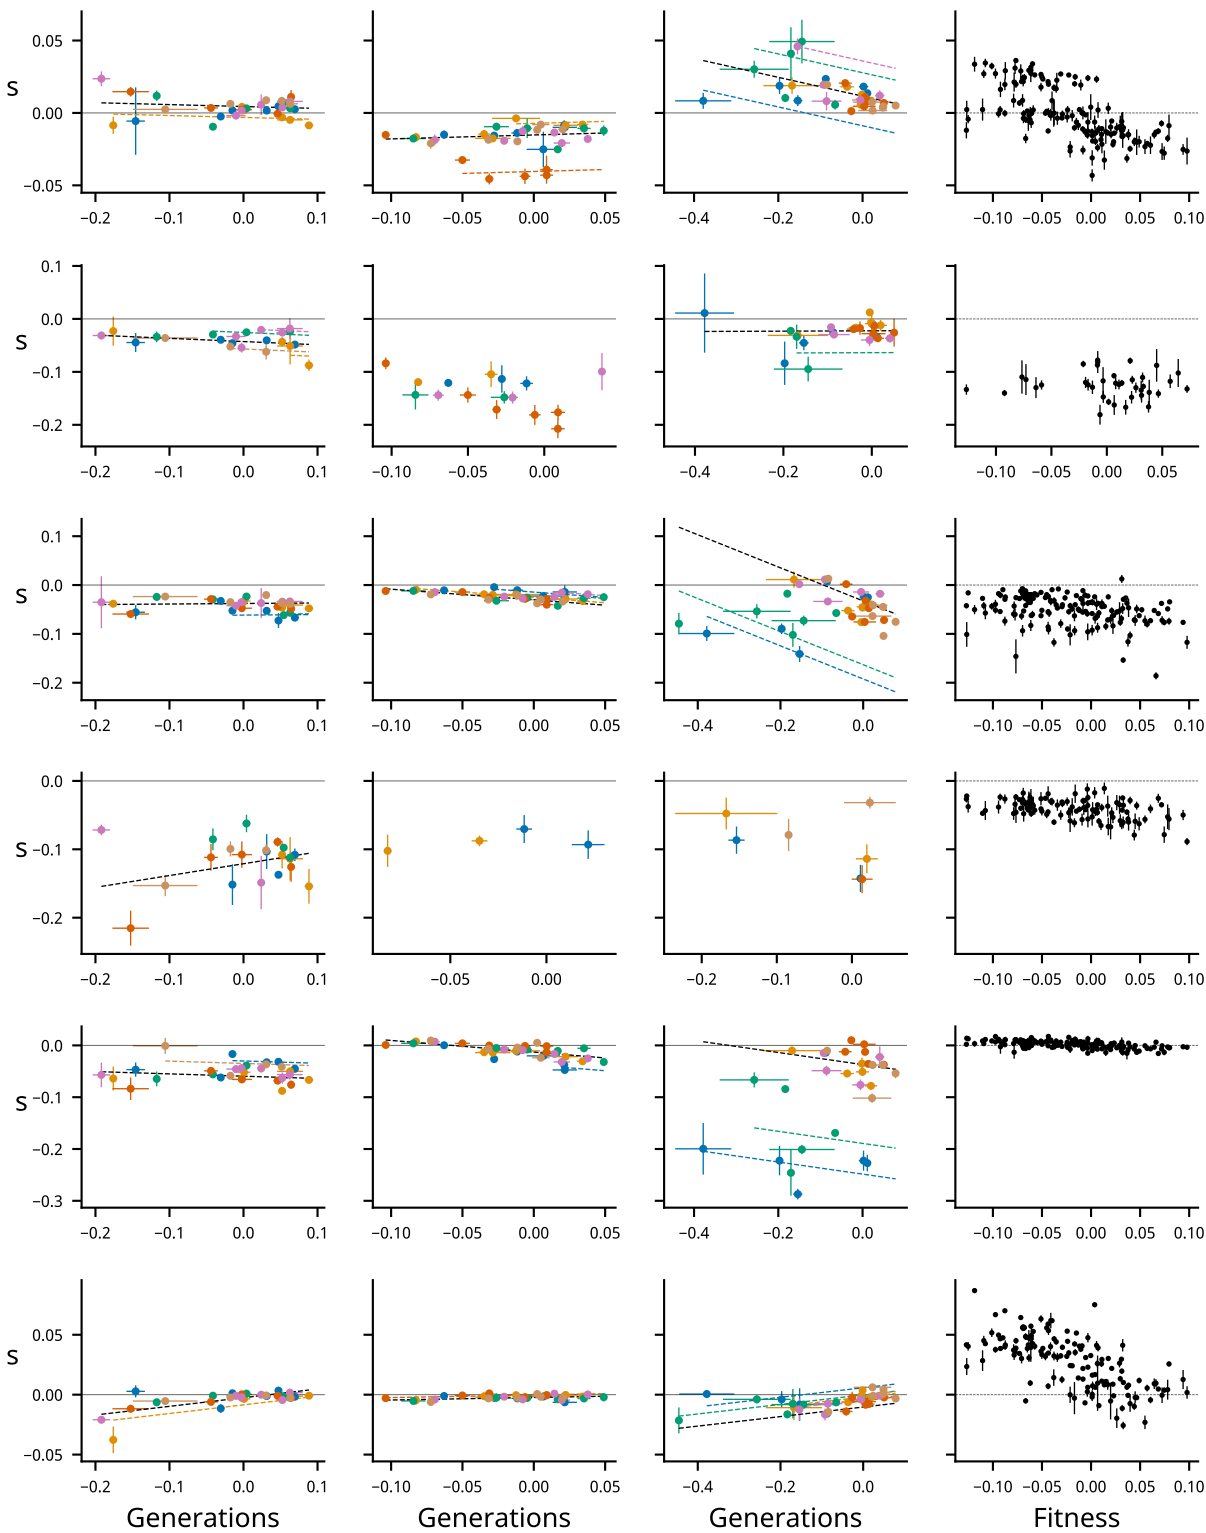

Generations

Generations

Generations

Fitness

P3C03 P3G02  
 P3D03 P3G05  
 P3F03 P3G06

P1B04 P1D03  
 P1C04 P1F05  
 P1C05 P1G04

P1B04 P1D03  
 P1C04 P1F05  
 P1C05 P1G04
