# Supplementary material for: Mutational robustness changes during long-term adaptation in laboratory budding yeast populations
Source: eLife journal article supplement (doi:10.7554/elife.76491), 2022-07-26
Supplement: supp [file elife-76491-supp-v1.zip]

SC 37°C

YPD 30°C

Evo. YPD 30°C  
in SC 37°C

BY x RM

in SIR4

in SIR4

in SLX5

in SLX8

in SLX8

in SPT8

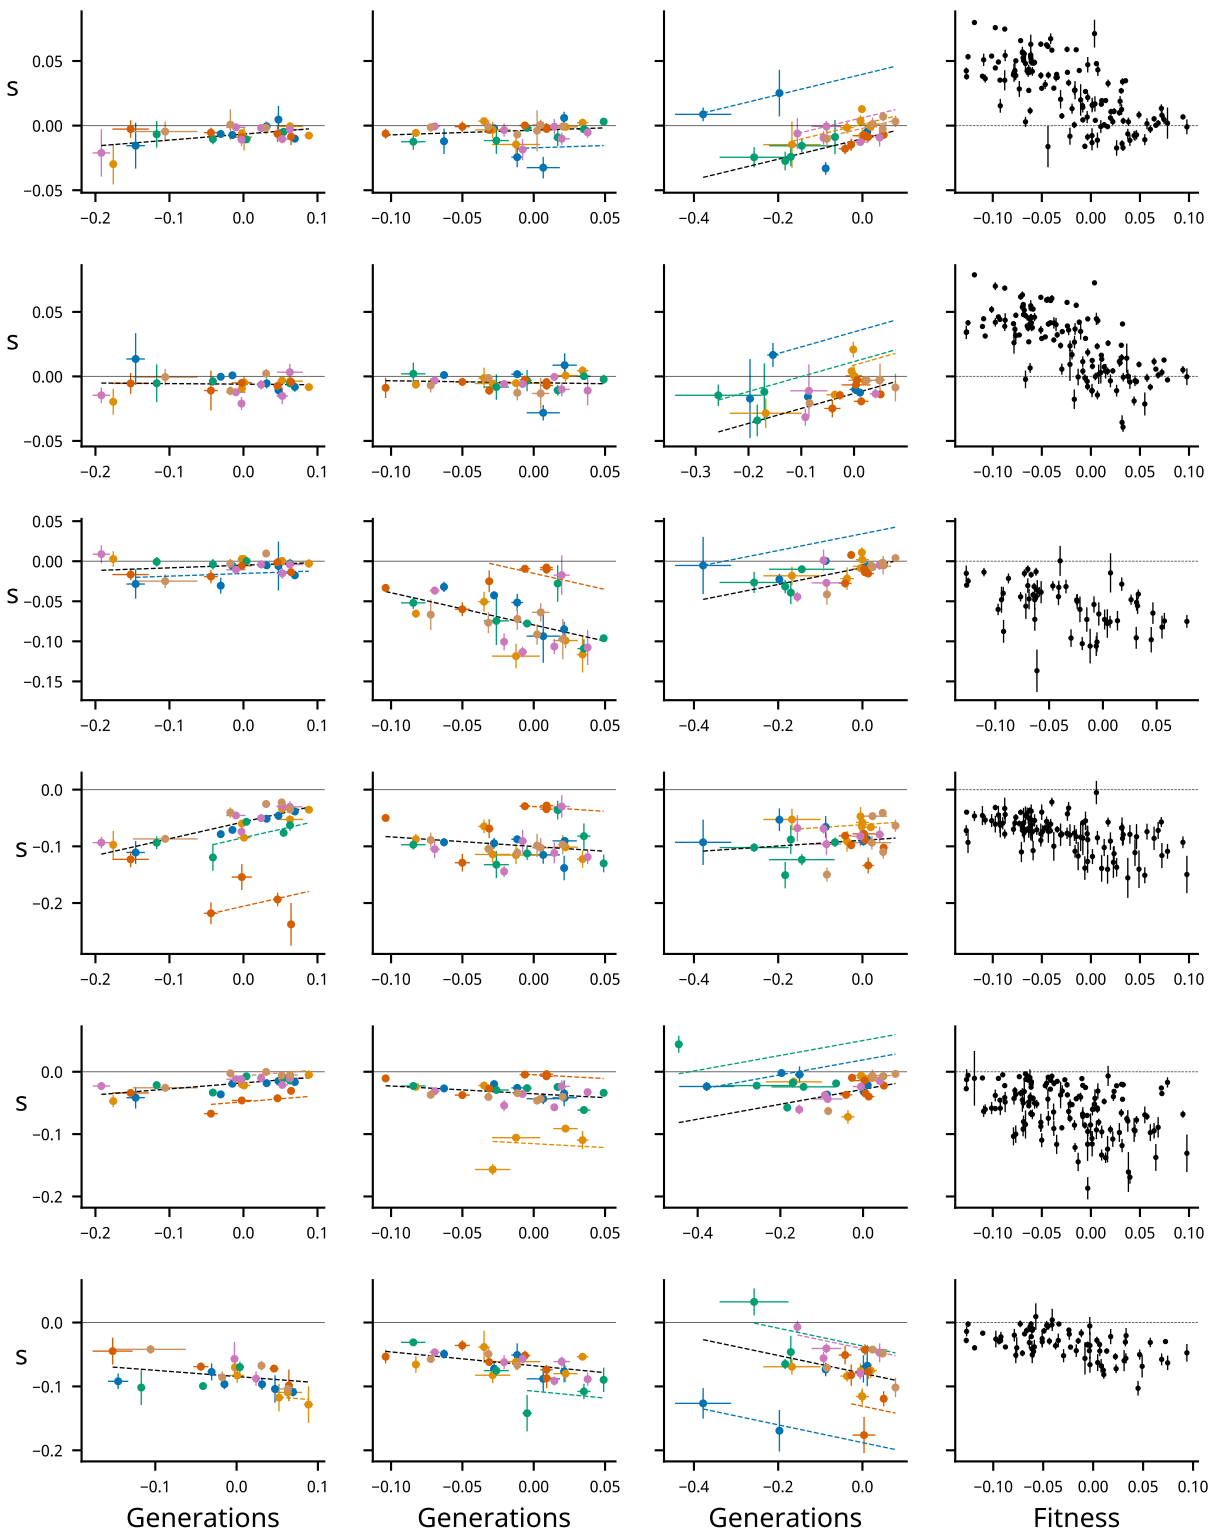

Generations

P3C03 P3G02  
 P3D03 P3G05  
 P3F03 P3G06

Generations

P1B04 P1D03  
 P1C04 P1F05  
 P1C05 P1G04

Generations

P1B04 P1D03  
 P1C04 P1F05  
 P1C05 P1G04

Fitness
