# Supplementary material for: Mutational robustness changes during long-term adaptation in laboratory budding yeast populations
Source: eLife journal article supplement (doi:10.7554/elife.76491), 2022-07-26
Supplement: supp [file elife-76491-supp-v1.zip]

SC 37°C

YPD 30°C

Evo. YPD 30°C  
in SC 37°C

BY x RM

in KAP123

in LAT1

in MAC1

in MCK1

in MME1

in MPC2

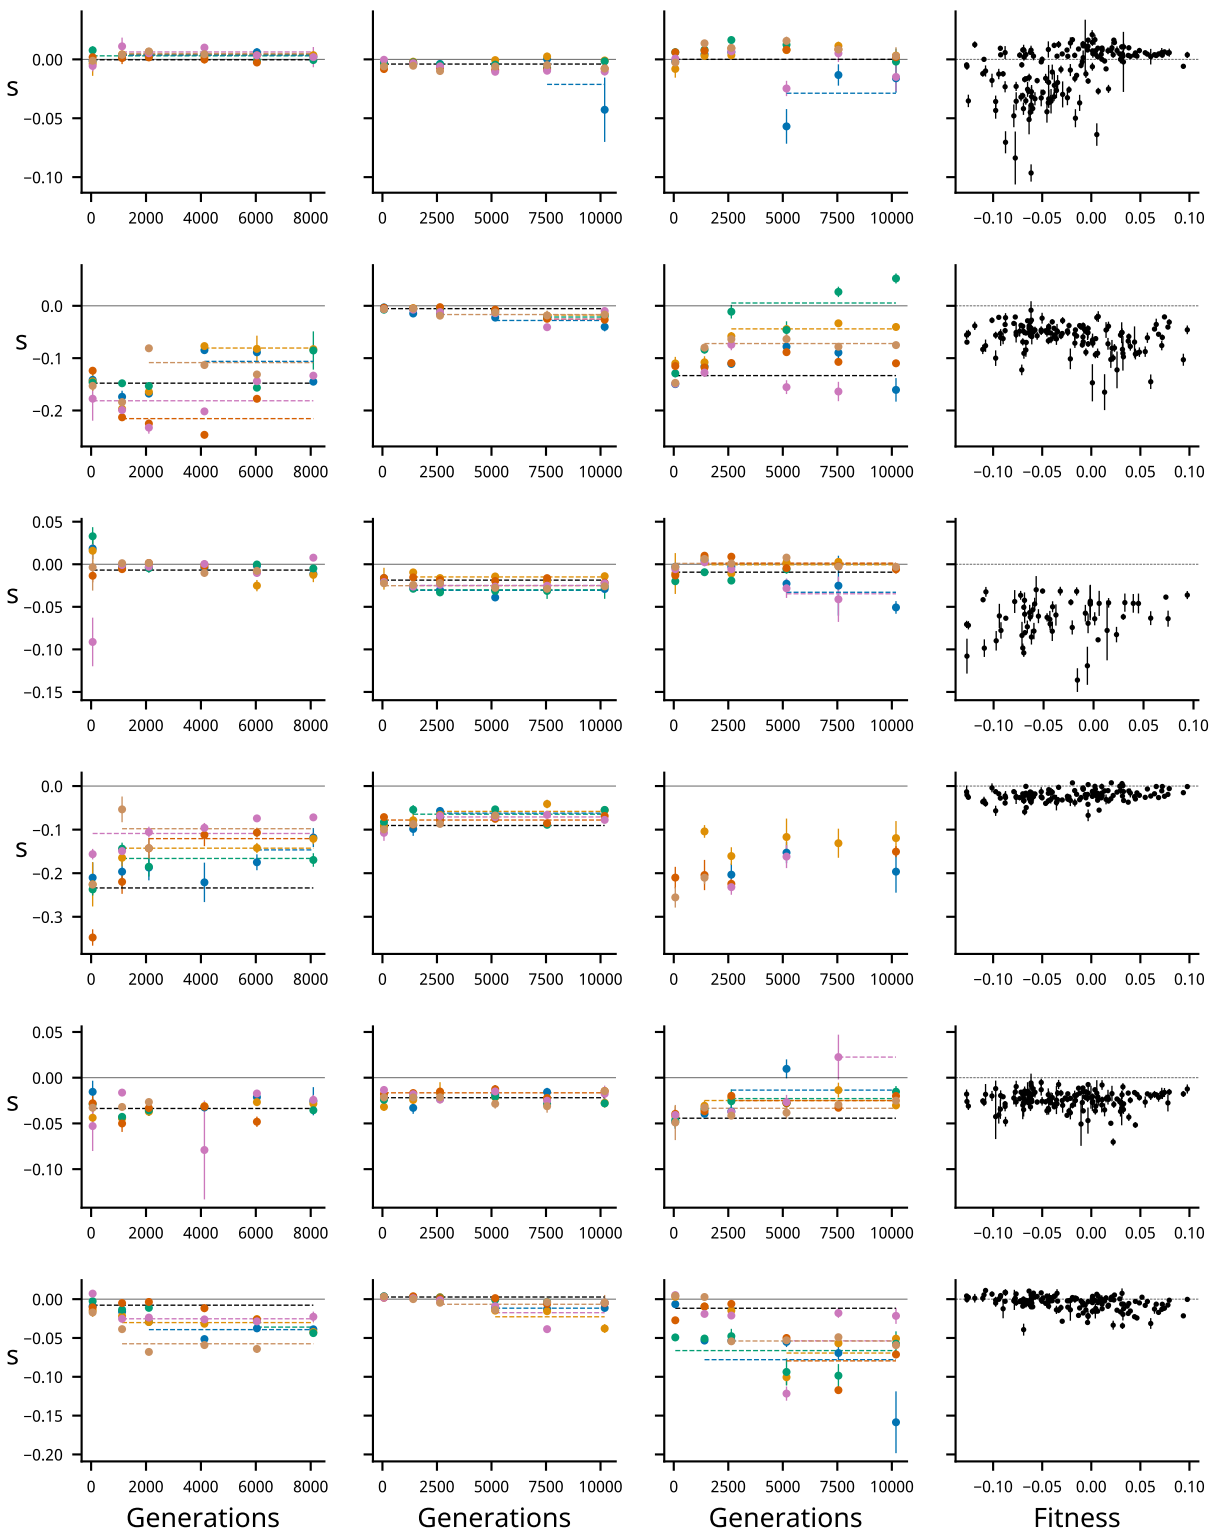

Generations

Generations

Generations

Fitness

P3C03 P3G02  
P3D03 P3G05  
P3F03 P3G06

P1B04 P1D03  
P1C04 P1F05  
P1C05 P1G04

P1B04 P1D03  
P1C04 P1F05  
P1C05 P1G04
