# Supplementary material for: Mutational robustness changes during long-term adaptation in laboratory budding yeast populations
Source: eLife journal article supplement (doi:10.7554/elife.76491), 2022-07-26
Supplement: supp [file elife-76491-supp-v1.zip]

YPD 30°C

SC 37°C

DFE mean

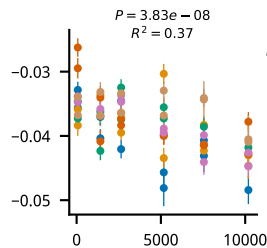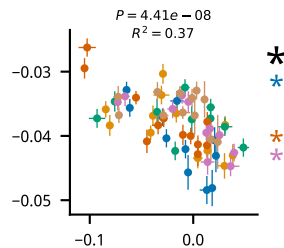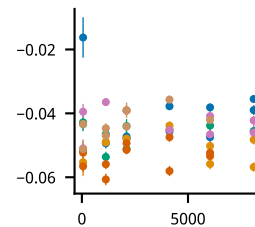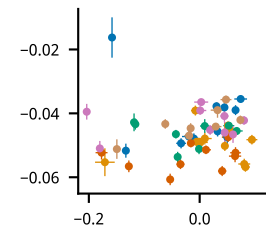DFE mean  
(limited)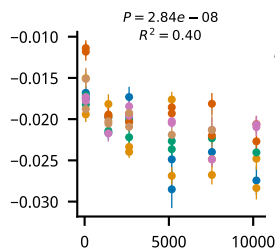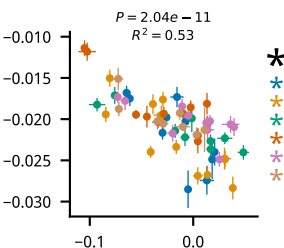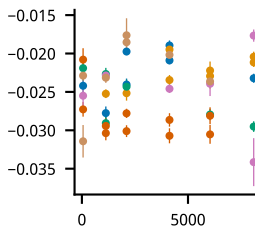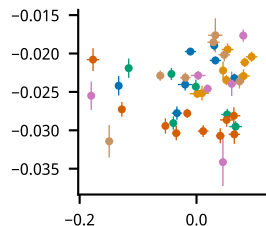DFE mean  
(filled in)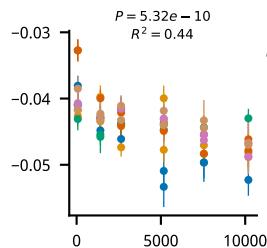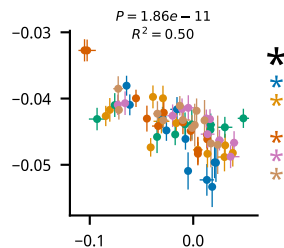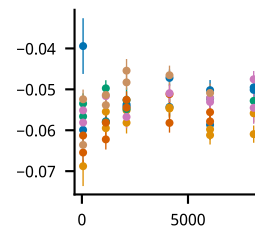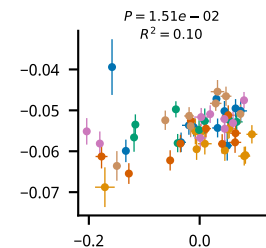# strongly deleterious  
mut. measured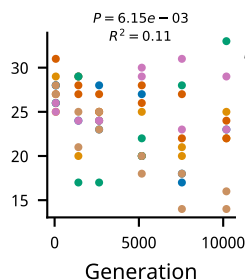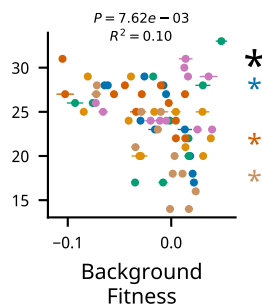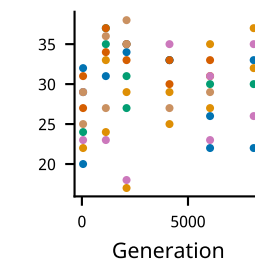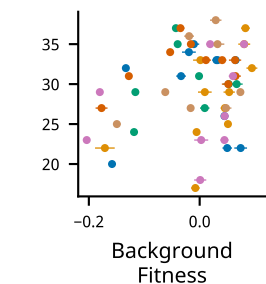

P1B04  
P1C04  
P1C05

P1D03  
P1F05  
P1G04

P3C03  
P3D03  
P3F03

P3G02  
P3G05  
P3G06
