# Supplementary material for: Mutational robustness changes during long-term adaptation in laboratory budding yeast populations
Source: eLife journal article supplement (doi:10.7554/elife.76491), 2022-07-26
Supplement: supp [file elife-76491-supp-v1.zip]

# Evo. YPD 30°C, in SC 37°C

SC  
37°C

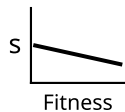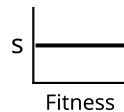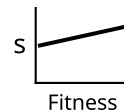

in NOP16

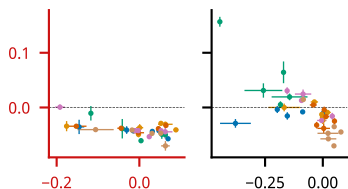

9/68 (13%) examples

in ADE5,7

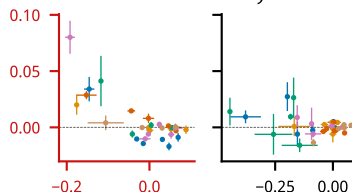

5/68 (7%) examples

nearby VMA7

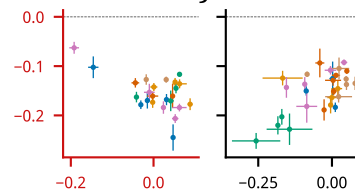

2/68 (3%) examples

in MAC1

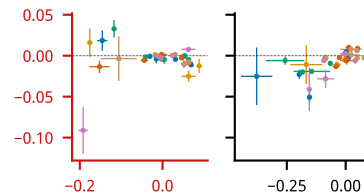

11/68 (16%) examples

in SSK1

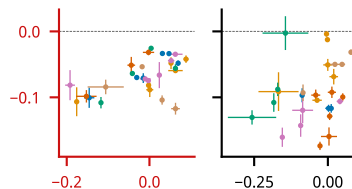

9/68 (13%) examples

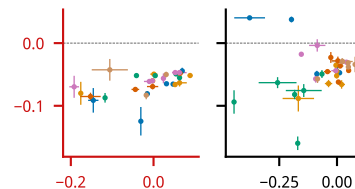

2/68 (3%) examples

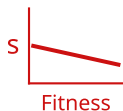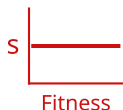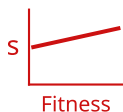

0 examples
