# Supplementary material for: Mutational robustness changes during long-term adaptation in laboratory budding yeast populations
Source: eLife. 2022 Jul 26;11:e76491. doi: 10.7554/eLife.76491 (PMC9355567; doi:10.7554/eLife.76491)
Supplement: Supplementary file 1. — Includes background fitness, fitness effect, and modeling data from this experiment and Johnson et al., 2019. [file elife-76491-supp1.xlsx]

## Sheet: Column_explainer
See explanation of all columns below
Some Notes:
Population naming	Populations are named based on their plate (P1 is the YPD 30C environment, P3 is the SC 37C environment) and well location (e.g., P1C04)
Generations	For simplicity, the 6 timepoints are referred to by consistent names in columns, but the exact number of generations is given by the following dictionary (generation numbers vary because P3 does 8 generations per day, and occasionally due to errors in pipetting etc. one plate was set back by a day):
	gen_fixer = {70: {'P1': 70, 'P3': 56}, 550: {'P1': 560, 'P3': 448}, 1410: {'P1': 1410, 'P3': 1128}, 2640: {'P1': 2640, 'P3': 2104}, 3630: {'P1': 3660, 'P3': 2920}, 5150: {'P1': 5170, 'P3': 4128}, 7530: {'P1': 7550, 'P3': 6040}, 10150: {'P1': 10190, 'P3': 8096}}
Environments	There are 3 environments in this data, but we only use data from the first two: YPD_30C and SC_37C. The other "bad_SC_37C" was from a failed experiment in which the SC reagents we were using (specifically YNB) had gone bad, and cells struggled to grow. This was fixed by buying new reagents. We still report this data here even though it doesn't appear in the paper because we have it, and it is tec…
VTn_x	Data on the background fitness of clones isolated from the evolution experiment
Sample	Sample name in format G<generation>_<population>_<environment>
Gen_pop	<generation>_<population>
Gen	Generation the clone was isolated from (see generations note above)
Pop	Population the clone was isolated from
Cond	<plate>_<environment> (Plate refers to the evolution environment (P1 or P3, see above), environment is the assay environment)
Env	Evolution Environment
Fitness	Fitness at this population-timepoint, measured as the mean of the two clone fitnesses
Fitness_std	Standard error of the fitness measurement (stderr of two clones fitnesses)
s_VLTE	Fitness at this population-timepoint, measured with a whole population fitness assay in Johnson et al. 2021
s_VLTE_scaled	Same as s_VLTE, but scaled based on our best estimate of the fitness of the ancestor
Clone_A/B_s	Fitness measured for clone A/B from this population-timepoint
Clone_A/B_s_stderr	Standard error of the clone A/B fitness measurement (stderr of two replicate assays)
VTn_s	Data on fitness effects of mutations in this experiment
Sample	Sample name in format G<generation>_<population>_<environment>
Gen_pop	<generation>_<population>
Gen	Generation the clone was isolated from (see generations note above)
Pop	Population the clone was isolated from
Cond	<plate>_<environment> (Plate refers to the evolution environment (P1 or P3, see above), environment is the assay environment)
Env	Evolution Environment
Edge	15 base pair sequence next to the transposon insertion - uniquely identifies mutations
s	Fitness effect measured for this mutation in this sample
stderr	The standard error of the fitness effect measurement (see Methods)
num_cbcs	The number of cBCs associated with this fitness measurement
pval	P-value of t-test testing if the fitness effect is nonzero (see Methods)
bh_pval	Benjamini-Hochberg-corrected P-value of t-test testing if the fitness effect is nonzero (see Methods)
g70_s	The mean fitness effect of this mutation in all generation 70 (first timepoint) samples in this condition
s_sub_g70_s	s - g70_s (used for showing model fits)
pval	P-value of t-test testing if the fitness effect is nonzero (see Methods)
bh_pval	Benjamini-Hochberg-corrected P-value of t-test testing if the fitness effect is nonzero (see Methods)
Clone_A/B_s	Fitness effect measured for clone A/B this mutation in this sample
Clone_A/B_stderr	The standard error of the fitness effect measurement (see Methods)
Clone_A/B_num_cbcs	The number of cBCs associated with this fitness measurement
BYxRM_x	Data on the background fitness of clones from Johnson et al. 2019
Sample	Name of clone
Fitness	Fitness as measured in Johnson et al. 2019
Fitness_std	Standard error of the fitness measurement (stderr of two replicate assays)
BYxRM_s	Data on fitness effects of mutations in this Johnson et al. 2019
Edge	15 base pair sequence next to the transposon insertion - uniquely identifies mutations
Sample	Name of clone
s	Fitness effect of mutation
stderr	The standard error of the fitness effect measurement (see Methods, Johnson et al. 2019)
num_cbcs	The number of cBCs associated with this fitness measurement
pval	P-value of t-test testing if the fitness effect is nonzero (see Methods)
bh_pval	Benjamini-Hochberg-corrected P-value of t-test testing if the fitness effect is nonzero (see Methods)
vtn_modeling / vtn_modeling_clones	Data on model results for each mutation in this experiment, either on a population-timepoint or clone basis, respectively
Edge	15 base pair sequence next to the transposon insertion - uniquely identifies mutations
Cond	<plate>_<environment> (Plate refers to the evolution environment (P1 or P3, see above), environment is the assay environment)
Model	XM: Fitness Model, IM: Idiosyncratic Model, FM: Full Model
R2	R-squared for model
LLF	Log likelihood of model
BIC	Bayesian Information Criterion for model
Params	Parameters for the model: Fitness_sub_70 is the background fitness parameter, the others are indicator variables (e.g. ind_P1F05_7530 is a variable that is 1 from generation 7530 onwards in population P1F05, but 0 for all other population-timepoints)
Coeffs	Coefficients for each parameter, in the same order as Params
Pvalues	P-value for each parameter as inferred by statsmodels
data_by_mutation	A dataset constructed from the data above that has one row per mutation
Edge	15 base pair sequence next to the transposon insertion - uniquely identifies mutations
chromosome	Chromosome of insertion location
insertion_edge	Position of insertion location
Type	Type of mutation: Reference, Experiment, or Extra Control / Mistake (only Experiment mutations are analyzed, Extra Control mutations were part of an earlier plan to have control mutations in another set of yeast strains, not used here at all, and Extra Mistake are mutations that were not intended to be included in this mutation set but made it through our initial library selection, also not used …
Gene_Use	Where the insertion mutation is, either "in" a gene or ORF or "nearby" (within 500 bp of) a gene or ORF
briefDescription	briefDescription of gene/ORF from SGD for "in" gene annotations
phenotypeSummary	phenotypeSummary of gene/ORF from SGD for "in" gene annotations
phenotypeSummary.nearby	phenotypeSummary of gene/ORF from SGD for "nearby" gene annotations
<Condition>_s_mean	Mean fitness effect measured across samples in this condition
<Condition>_s_var	Variance of fitness effects measured across samples in this condition
<Condition>_slope	Slope of fitness effect vs. background fitness regression
<Condition>_p	P-value of fitness effect vs. background fitness regression
<Condition>_bh_p	Benjamini-Hochberg-corrected P-value of fitness effect vs. background fitness regression
<Condition>_x_R2	R-squared of fitness effect vs. background fitness regression
<Condition>_call	Call of whether mutation has a negative (-), positive (+), or non-significant (NS) relationship with background fitness (See methods, Figure 2)
<Condition>_<Model>_<Modeling_Column>	Model results for a particular condition and model. Modeling_Column will be one of the columns above (R2, BIC, Params, Coeffs, Pvalues)

## Sheet: VTn_x
Sample	Gen_Pop	Gen	Pop	Cond	Env	Fitness	Fitness_std	s_VLTE	s_VLTE_scaled	Clone_A_s	Clone_B_s	Clone_A_s_stderr	Clone_B_s_stderr
G10150_P1B04-YPD_30C	G10150_P1B04	10150	P1B04	P1_YPD_30C	YPD_30C	0.0216965	0.00850672	0.0264552	0.0191633	0.0131898	0.0302032	0.00697222	0.00146752
G10150_P1C04-YPD_30C	G10150_P1C04	10150	P1C04	P1_YPD_30C	YPD_30C	0.0342377	0.004011	0.055203	0.0479111	0.0382487	0.0302267	0.00219982	0.00657589
G10150_P1C05-YPD_30C	G10150_P1C05	10150	P1C05	P1_YPD_30C	YPD_30C	0.0490305	0.000544526	0.0745379	0.067246	0.048486	0.0495751	0.00547228	0.00563699
G10150_P1D03-YPD_30C	G10150_P1D03	10150	P1D03	P1_YPD_30C	YPD_30C	0.00903234	0.00456805	0.0154368	0.00814493	0.0136004	0.00446428	0.00136621	0.00277576
G10150_P1F05-YPD_30C	G10150_P1F05	10150	P1F05	P1_YPD_30C	YPD_30C	0.0378047	0.00168771	0.04902	0.0417281	0.0394924	0.036117	0.00398672	0.00860193
G10150_P1G04-YPD_30C	G10150_P1G04	10150	P1G04	P1_YPD_30C	YPD_30C	0.0203752	0.00328151	0.0227016	0.0154097	0.0170937	0.0236567	0.00401695	0.00169241
G1410_P1B04-YPD_30C	G1410_P1B04	1410	P1B04	P1_YPD_30C	YPD_30C	-0.0277924	0.00188783	-0.0288691	-0.036161	-0.0259045	-0.0296802	0.0026617	0.000972002
G1410_P1C04-YPD_30C	G1410_P1C04	1410	P1C04	P1_YPD_30C	YPD_30C	-0.0348166	0.00410884	-0.0425726	-0.0498645	-0.0389255	-0.0307078	0.00353692	0.00766641
G1410_P1C05-YPD_30C	G1410_P1C05	1410	P1C05	P1_YPD_30C	YPD_30C	-0.0261946	0.00876561	-0.032213	-0.0395049	-0.017429	-0.0349603	0.00226213	0.00110723
G1410_P1D03-YPD_30C	G1410_P1D03	1410	P1D03	P1_YPD_30C	YPD_30C	-0.0500462	0.00527002	-0.053501	-0.0607929	-0.0447762	-0.0553162	0.0012004	0.00331881
G1410_P1F05-YPD_30C	G1410_P1F05	1410	P1F05	P1_YPD_30C	YPD_30C	-0.0207598	0.000839428	-0.0170005	-0.0242924	-0.0199203	-0.0215992	0.00516216	0.00335398
G1410_P1G04-YPD_30C	G1410_P1G04	1410	P1G04	P1_YPD_30C	YPD_30C	-0.0317687	0.00282392	-0.0323282	-0.0396201	-0.0345926	-0.0289447	0.00390954	0.00497153
G2640_P1B04-YPD_30C	G2640_P1B04	2640	P1B04	P1_YPD_30C	YPD_30C	-0.011584	0.00409856	-0.0130674	-0.0173036	-0.0156826	-0.00748548	0.00649236	0.00129805
G2640_P1C04-YPD_30C	G2640_P1C04	2640	P1C04	P1_YPD_30C	YPD_30C	-0.0287644	0.0123748	-0.0204923	-0.0247284	-0.0163896	-0.0411392	0.00243196	0.00245859
G2640_P1C05-YPD_30C	G2640_P1C05	2640	P1C05	P1_YPD_30C	YPD_30C	-0.00464801	0.00327419	-0.00171089	-0.005947	-0.00137383	-0.0079222	0.00166497	0.00446336
G2640_P1D03-YPD_30C	G2640_P1D03	2640	P1D03	P1_YPD_30C	YPD_30C	-0.0312036	0.00274777	-0.0260699	-0.0303061	-0.0284558	-0.0339513	0.00276906	0.00583839
G2640_P1F05-YPD_30C	G2640_P1F05	2640	P1F05	P1_YPD_30C	YPD_30C	-0.00778665	0.00303288	-0.00691024	-0.0111463	-0.00475377	-0.0108195	0.0059211	0.00393569
G2640_P1G04-YPD_30C	G2640_P1G04	2640	P1G04	P1_YPD_30C	YPD_30C	-0.0115101	0.00144645	-0.0101543	-0.0143904	-0.0129566	-0.0100637	0.00350411	0.00711485
G5150_P1B04-YPD_30C	G5150_P1B04	5150	P1B04	P1_YPD_30C	YPD_30C	0.00666988	0.0116444	0.0091648	0.0018729	0.0183143	-0.00497454	0.00167576	0.000910556
G5150_P1C04-YPD_30C	G5150_P1C04	5150	P1C04	P1_YPD_30C	YPD_30C	-0.012405	0.0168491	0.0141096	0.0068177	-0.0292542	0.00444406	0.000614213	0.00470754
G5150_P1C05-YPD_30C	G5150_P1C05	5150	P1C05	P1_YPD_30C	YPD_30C	0.0168074	9.43226e-05	0.0299227	0.0226308	0.0169017	0.0167131	0.00420103	0.00229128
G5150_P1D03-YPD_30C	G5150_P1D03	5150	P1D03	P1_YPD_30C	YPD_30C	-0.0061826	0.00377414	-0.00151528	-0.00880718	-0.00995674	-0.00240846	0.00283473	0.00220136
G5150_P1F05-YPD_30C	G5150_P1F05	5150	P1F05	P1_YPD_30C	YPD_30C	0.0144413	0.00177295	0.0229349	0.015643	0.0126683	0.0162142	0.00256925	0.00298291
G5150_P1G04-YPD_30C	G5150_P1G04	5150	P1G04	P1_YPD_30C	YPD_30C	0.00235431	0.000900793	0.00614037	-0.00115153	0.0032551	0.00145351	0.00236463	0.003012
G70_P1B04-YPD_30C	G70_P1B04	70	P1B04	P1_YPD_30C	YPD_30C	-0.0628752	0.00156466	-0.069021	-0.0732571	-0.0613106	-0.0644399	0.0024899	0.0023702
G70_P1C04-YPD_30C	G70_P1C04	70	P1C04	P1_YPD_30C	YPD_30C	-0.0825937	0.00195283	-0.0849556	-0.0891918	-0.0806408	-0.0845465	0.000594986	0.00271467
G70_P1C05-YPD_30C	G70_P1C05	70	P1C05	P1_YPD_30C	YPD_30C	-0.0844032	0.00854618	-0.086955	-0.0911912	-0.075857	-0.0929494	0.00315404	0.00792181
G70_P1D03-YPD_30C	G70_P1D03	70	P1D03	P1_YPD_30C	YPD_30C	-0.103808	0.0012606	-0.099729	-0.103965	-0.105069	-0.102548	0.00340658	0.00841082
G70_P1F05-YPD_30C	G70_P1F05	70	P1F05	P1_YPD_30C	YPD_30C	-0.0694162	0.00353414	-0.0698736	-0.0741097	-0.0658821	-0.0729504	0.00450479	0.000166264
G70_P1G04-YPD_30C	G70_P1G04	70	P1G04	P1_YPD_30C	YPD_30C	-0.0721868	0.000326355	-0.0730288	-0.0772649	-0.0725131	-0.0718604	0.00479272	0.0018097
G7530_P1B04-YPD_30C	G7530_P1B04	7530	P1B04	P1_YPD_30C	YPD_30C	0.0213175	0.000630784	0.0273329	0.0230968	0.0219483	0.0206867	0.00132229	0.000164872
G7530_P1C04-YPD_30C	G7530_P1C04	7530	P1C04	P1_YPD_30C	YPD_30C	0.0223072	0.00854021	0.0530531	0.048817	0.013767	0.0308474	0.000184362	0.00354744
G7530_P1C05-YPD_30C	G7530_P1C05	7530	P1C05	P1_YPD_30C	YPD_30C	0.0351722	0.00459127	0.063863	0.0596269	0.0397635	0.0305809	0.00257203	0.00725323
G7530_P1D03-YPD_30C	G7530_P1D03	7530	P1D03	P1_YPD_30C	YPD_30C	0.00892114	0.00439953	0.0111435	0.00690741	0.00452161	0.0133207	0.00012663	0.00144034
G7530_P1F05-YPD_30C	G7530_P1F05	7530	P1F05	P1_YPD_30C	YPD_30C	0.0196293	0.00573124	0.0416914	0.0374553	0.0253605	0.013898	0.00417875	0.00666034
G7530_P1G04-YPD_30C	G7530_P1G04	7530	P1G04	P1_YPD_30C	YPD_30C	0.00489257	0.00604192	0.0206503	0.0164142	-0.00114935	0.0109345	0.00245655	0.00131057
G10150_P3C03-SC_37C	G10150_P3C03	10150	P3C03	P3_SC_37C	SC_37C	0.0693889	0.00460896	0.0840847	0.128152	0.0739979	0.0647799	0.0114925	0.00583822
G10150_P3D03-SC_37C	G10150_P3D03	10150	P3D03	P3_SC_37C	SC_37C	0.0884245	0.00583059	0.0989671	0.143034	0.0942551	0.0825939	0.00983085	0.00797723
G10150_P3F03-SC_37C	G10150_P3F03	10150	P3F03	P3_SC_37C	SC_37C	0.0628738	0.00392045	0.0793512	0.123418	0.0589534	0.0667943	0.00495961	0.010825
G10150_P3G02-SC_37C	G10150_P3G02	10150	P3G02	P3_SC_37C	SC_37C	0.0747355	0.00681665	0.0845614	0.128629	0.0679188	0.0815521	0.00576004	0.0123891
G10150_P3G05-SC_37C	G10150_P3G05	10150	P3G05	P3_SC_37C	SC_37C	0.0626151	0.0174262	0.0580565	0.102124	0.0800413	0.0451888	0.00656658	0.00664043
G10150_P3G06-SC_37C	G10150_P3G06	10150	P3G06	P3_SC_37C	SC_37C	0.0767324	0.00104306	0.101002	0.145069	0.0756894	0.0777755	0.0050138	0.00837159
G1410_P3C03-SC_37C	G1410_P3C03	1410	P3C03	P3_SC_37C	SC_37C	-0.0307193	0.00284061	-0.0679482	-0.0238809	-0.0335599	-0.0278787	0.00880172	0.012344
G1410_P3D03-SC_37C	G1410_P3D03	1410	P3D03	P3_SC_37C	SC_37C	-0.00208293	0.00344196	-0.0037649	0.0403024	0.00135903	-0.00552489	0.0132436	0.00580581
G1410_P3F03-SC_37C	G1410_P3F03	1410	P3F03	P3_SC_37C	SC_37C	-0.0413065	0.00160116	-0.0755771	-0.0315099	-0.0429076	-0.0397053	0.00267566	0.00565549
G1410_P3G02-SC_37C	G1410_P3G02	1410	P3G02	P3_SC_37C	SC_37C	-0.0439482	0.00930032	-0.0514012	-0.00733393	-0.0346479	-0.0532486	0.0071255	0.00424473
G1410_P3G05-SC_37C	G1410_P3G05	1410	P3G05	P3_SC_37C	SC_37C	-0.0101852	0.012952	-0.0427739	0.00129338	0.00276672	-0.0231372	0.0126358	0.00622172
G1410_P3G06-SC_37C	G1410_P3G06	1410	P3G06	P3_SC_37C	SC_37C	-0.0176769	0.00140264	-0.0357382	0.0083291	-0.0190795	-0.0162742	0.00881515	0.00388303
G2640_P3C03-SC_37C	G2640_P3C03	2640	P3C03	P3_SC_37C	SC_37C	-0.0149376	0.00449696	-0.0206081	-0.000912991	-0.0194346	-0.0104406	0.0124515	0.00959406
G2640_P3D03-SC_37C	G2640_P3D03	2640	P3D03	P3_SC_37C	SC_37C	0.000785377	0.00853521	0.0147688	0.034464	-0.00774984	0.00932059	0.0078228	0.0123293
G2640_P3F03-SC_37C	G2640_P3F03	2640	P3F03	P3_SC_37C	SC_37C	0.00402698	0.0051494	-0.00120948	0.0184856	0.00917638	-0.00112243	0.00853715	0.00507281
G2640_P3G02-SC_37C	G2640_P3G02	2640	P3G02	P3_SC_37C	SC_37C	-0.00225101	0.0136092	-0.00501167	0.0146834	0.0113582	-0.0158602	0.00905009	0.00467366
G2640_P3G05-SC_37C	G2640_P3G05	2640	P3G05	P3_SC_37C	SC_37C	-0.00264094	0.0036102	0.00250134	0.0221964	0.000969264	-0.00625114	0.0109518	0.00611148
G2640_P3G06-SC_37C	G2640_P3G06	2640	P3G06	P3_SC_37C	SC_37C	0.0306051	0.00161424	0.0414372	0.0611323	0.0322193	0.0289908	0.0122798	0.0103439
G5150_P3C03-SC_37C	G5150_P3C03	5150	P3C03	P3_SC_37C	SC_37C	0.0313309	0.00102502	0.013589	0.0576563	0.0303059	0.032356	0.00498816	0.00971635
G5150_P3D03-SC_37C	G5150_P3D03	5150	P3D03	P3_SC_37C	SC_37C	0.0521638	0.00110824	0.0490334	0.0931007	0.053272	0.0510555	0.0102122	0.00522946
G5150_P3F03-SC_37C	G5150_P3F03	5150	P3F03	P3_SC_37C	SC_37C	0.0416017	0.00714965	0.0122159	0.0562831	0.0487513	0.034452	0.0104657	0.0118864
G5150_P3G02-SC_37C	G5150_P3G02	5150	P3G02	P3_SC_37C	SC_37C	0.0460902	0.0054741	0.0208528	0.06492	0.0515643	0.0406161	0.0114936	0.00756436
G5150_P3G05-SC_37C	G5150_P3G05	5150	P3G05	P3_SC_37C	SC_37C	0.0239083	0.00497671	-0.0195499	0.0245173	0.0189316	0.028885	0.00674376	0.00898739
G5150_P3G06-SC_37C	G5150_P3G06	5150	P3G06	P3_SC_37C	SC_37C	0.0516425	0.00413436	0.0453465	0.0894138	0.0475081	0.0557768	0.00982766	0.00522375
G70_P3C03-SC_37C	G70_P3C03	70	P3C03	P3_SC_37C	SC_37C	-0.145687	0.0124827	-0.232418	-0.212723	-0.15817	-0.133205	0.00429724	0.000261243
G70_P3D03-SC_37C	G70_P3D03	70	P3D03	P3_SC_37C	SC_37C	-0.175945	0.00488971	-0.201049	-0.181354	-0.171055	-0.180835	0.0177445	0
G70_P3F03-SC_37C	G70_P3F03	70	P3F03	P3_SC_37C	SC_37C	-0.117237	0.00118713	-0.0919555	-0.0722604	-0.116049	-0.118424	0.00169412	0.00291472
G70_P3G02-SC_37C	G70_P3G02	70	P3G02	P3_SC_37C	SC_37C	-0.152454	0.0246358	-0.200123	-0.180428	-0.127819	-0.17709	0.000761582	0.0107835
G70_P3G05-SC_37C	G70_P3G05	70	P3G05	P3_SC_37C	SC_37C	-0.192002	0.0118189	-0.18461	-0.164914	-0.180183	-0.203821	0	0
G70_P3G06-SC_37C	G70_P3G06	70	P3G06	P3_SC_37C	SC_37C	-0.105759	0.0436885	-0.179009	-0.159314	-0.0620705	-0.149447	0.00321857	0.00682121
G7530_P3C03-SC_37C	G7530_P3C03	7530	P3C03	P3_SC_37C	SC_37C	0.047255	0.00249235	0.0653979	0.085093	0.0447626	0.0497473	0.00518775	0.00864134
G7530_P3D03-SC_37C	G7530_P3D03	7530	P3D03	P3_SC_37C	SC_37C	0.0629505	0.0174869	0.093002	0.112697	0.0454636	0.0804374	0.00597275	0.0107508
G7530_P3F03-SC_37C	G7530_P3F03	7530	P3F03	P3_SC_37C	SC_37C	0.0542961	0.00178115	0.0706288	0.0903239	0.0560772	0.0525149	0.00959598	0.00997837
G7530_P3G02-SC_37C	G7530_P3G02	7530	P3G02	P3_SC_37C	SC_37C	0.0643	0.000412269	0.082652	0.102347	0.0647123	0.0638877	0.0096453	0.0110635
G7530_P3G05-SC_37C	G7530_P3G05	7530	P3G05	P3_SC_37C	SC_37C	0.0524516	0.00773741	0.0540671	0.0737622	0.0447142	0.060189	0.00731768	0.00771014
G7530_P3G06-SC_37C	G7530_P3G06	7530	P3G06	P3_SC_37C	SC_37C	0.0630498	0.0104587	0.100446	0.120141	0.0525912	0.0735085	0.00456122	0.00607423
G10150_P1B04-SC_37C	G10150_P1B04	10150	P1B04	P1_SC_37C	SC_37C	-0.153673	0.0108283			-0.164501	-0.142845	0.00904135	0.00722601
G10150_P1C04-SC_37C	G10150_P1C04	10150	P1C04	P1_SC_37C	SC_37C	-0.00459173	0.0046138			2.20751e-05	-0.00920553	0.00406467	0.00243866
G10150_P1C05-SC_37C	G10150_P1C05	10150	P1C05	P1_SC_37C	SC_37C	-0.170036				-0.170036		0.0109512
G10150_P1D03-SC_37C	G10150_P1D03	10150	P1D03	P1_SC_37C	SC_37C	0.00379788	0.0271839			-0.023386	0.0309818	0.00619562	0.00426821
G10150_P1F05-SC_37C	G10150_P1F05	10150	P1F05	P1_SC_37C	SC_37C
G10150_P1G04-SC_37C	G10150_P1G04	10150	P1G04	P1_SC_37C	SC_37C	0.0491972	0.00847446			0.0576717	0.0407228	0.00524789	0.00367059
G1410_P1B04-SC_37C	G1410_P1B04	1410	P1B04	P1_SC_37C	SC_37C	0.00230855	0.0110986			0.0134072	-0.00879006	0.00285689	0.00213146
G1410_P1C04-SC_37C	G1410_P1C04	1410	P1C04	P1_SC_37C	SC_37C	0.0199127	0.0146186			0.0345312	0.00529409	0.000553158	8.95799e-05
G1410_P1C05-SC_37C	G1410_P1C05	1410	P1C05	P1_SC_37C	SC_37C	-0.065152	0.00226118			-0.0628909	-0.0674132	8.86821e-05	0.00442112
G1410_P1D03-SC_37C	G1410_P1D03	1410	P1D03	P1_SC_37C	SC_37C	0.0136285	0.0139326			-0.00030408	0.0275611	0.00167376	0.0016381
G1410_P1F05-SC_37C	G1410_P1F05	1410	P1F05	P1_SC_37C	SC_37C	-0.00503618	0.019612			0.0145758	-0.0246482	0.00290035	0.000258254
G1410_P1G04-SC_37C	G1410_P1G04	1410	P1G04	P1_SC_37C	SC_37C	0.0481216	0.00210262			0.0502243	0.046019	0.00712403	0.00472268
G2640_P1B04-SC_37C	G2640_P1B04	2640	P1B04	P1_SC_37C	SC_37C	0.0113677	0.00264645			0.0140141	0.00872122	0.000270455	0.00168481
G2640_P1C04-SC_37C	G2640_P1C04	2640	P1C04	P1_SC_37C	SC_37C	-0.036543	0.0159591			-0.0205839	-0.0525021	0.00507353	0.00456871
G2640_P1C05-SC_37C	G2640_P1C05	2640	P1C05	P1_SC_37C	SC_37C	-0.143932	0.0776618			-0.0662704	-0.221594	0.000666109	0.00231399
G2640_P1D03-SC_37C	G2640_P1D03	2640	P1D03	P1_SC_37C	SC_37C	0.0504459	0.00384252			0.0466033	0.0542884	0.00702477	0.00954962
G2640_P1F05-SC_37C	G2640_P1F05	2640	P1F05	P1_SC_37C	SC_37C	0.0408589	0.0110002			0.0298586	0.0518591	0.000813747	0.00744974
G2640_P1G04-SC_37C	G2640_P1G04	2640	P1G04	P1_SC_37C	SC_37C	0.0239172	0.0345275			0.0584447	-0.0106104	0.00183706	0.00300938
G5150_P1B04-SC_37C	G5150_P1B04	5150	P1B04	P1_SC_37C	SC_37C	-0.197118	0.00635989			-0.190758	-0.203478	0.0255262	0.02692
G5150_P1C04-SC_37C	G5150_P1C04	5150	P1C04	P1_SC_37C	SC_37C	-0.000294181	0.0153744			-0.0156686	0.0150803	0.00256269	0.00471206
G5150_P1C05-SC_37C	G5150_P1C05	5150	P1C05	P1_SC_37C	SC_37C	-0.257206	0.0819653			-0.175241	-0.339172	0.00965494	0.0331833
G5150_P1D03-SC_37C	G5150_P1D03	5150	P1D03	P1_SC_37C	SC_37C	0.00599039	0.00943632			0.0154267	-0.00344593	0.00220948	0.000786384
G5150_P1F05-SC_37C	G5150_P1F05	5150	P1F05	P1_SC_37C	SC_37C	-0.0855133	0.0353948			-0.0501185	-0.120908	0.00332867	0.00737169
G5150_P1G04-SC_37C	G5150_P1G04	5150	P1G04	P1_SC_37C	SC_37C	0.022523	0.0455996			-0.0230766	0.0681226	0.00106978	0.00407772
G70_P1B04-SC_37C	G70_P1B04	70	P1B04	P1_SC_37C	SC_37C	-0.0872894	0.00440096			-0.0916904	-0.0828884	0.00222247	0.00300386
G70_P1C04-SC_37C	G70_P1C04	70	P1C04	P1_SC_37C	SC_37C	-0.167365	0.0680248			-0.0993402	-0.23539	0.00858662	0.00122504
G70_P1C05-SC_37C	G70_P1C05	70	P1C05	P1_SC_37C	SC_37C	-0.183393	0.00671536			-0.176677	-0.190108	0.0131828	0.00434591
G70_P1D03-SC_37C	G70_P1D03	70	P1D03	P1_SC_37C	SC_37C	-0.0411281	0.0152405			-0.0258876	-0.0563686	0.00537826	0.000822957
G70_P1F05-SC_37C	G70_P1F05	70	P1F05	P1_SC_37C	SC_37C	-0.0922899	0.00403511			-0.0882548	-0.096325	0.00387955	0.00280752
G70_P1G04-SC_37C	G70_P1G04	70	P1G04	P1_SC_37C	SC_37C	-0.0842943	0.000592542			-0.0848869	-0.0837018	0.00179524	0.00512767
G7530_P1B04-SC_37C	G7530_P1B04	7530	P1B04	P1_SC_37C	SC_37C	-0.378213	0.0666496			-0.311563	-0.444863	0.0116327	0.0529177
G7530_P1C04-SC_37C	G7530_P1C04	7530	P1C04	P1_SC_37C	SC_37C	-0.00145297	0.00567323			0.00422026	-0.0071262	0.00188059	0.00247965
G7530_P1C05-SC_37C	G7530_P1C05	7530	P1C05	P1_SC_37C	SC_37C	-0.445743	0.00898254			-0.454726	-0.436761	0.0096288	0.0277982
G7530_P1D03-SC_37C	G7530_P1D03	7530	P1D03	P1_SC_37C	SC_37C	-0.026708	0.00371685			-0.0229911	-0.0304248	0.00485526	0.00436178
G7530_P1F05-SC_37C	G7530_P1F05	7530	P1F05	P1_SC_37C	SC_37C	-0.154465	0.00439072			-0.158856	-0.150074	0.0306928	0.0192665
G7530_P1G04-SC_37C	G7530_P1G04	7530	P1G04	P1_SC_37C	SC_37C	0.0784479	0.000425663			0.0788735	0.0780222	0.00497584	0.00429478

## Sheet: VTn_s
Sample	Gen_Pop	Gen	Pop	Cond	Env	Edge	s	stderr	num_cbcs	pval	bh_pval	g70_s	s_sub_g70_s	Clone_A_s	Clone_A_stderr	Clone_A_num_cbcs	Clone_B_s	Clone_B_stderr	Clone_B_num_cbcs
G7530_P1C04-SC_37C	G7530_P1C04	7530	P1C04	P1_SC_37C	SC_37C	AAAACATTATCAAAG	0.00425261	0.00391365	9	0.170924	0.235505	-0.000652642	0.00490526	0.00660094	0.00260267	4	-0.00518697	0.00521814	5
G7530_P1C04-SC_37C	G7530_P1C04	7530	P1C04	P1_SC_37C	SC_37C	AAAAGAAAAATGTAT	-0.0548838	0.00310495	10	1.11156e-06	1.34894e-05	0.0418506	-0.0967344	-0.0556523	0.00505451	5	-0.0543741	0.00411672	5
G7530_P1C04-SC_37C	G7530_P1C04	7530	P1C04	P1_SC_37C	SC_37C	AAAAGCGACATTTCT	-0.00174745	0.00495469	7	0.860456	0.89122	-0.0616103	0.0598628	0.00124536	0.00276815	2	-0.0117022	0.00504853	5
G7530_P1C04-SC_37C	G7530_P1C04	7530	P1C04	P1_SC_37C	SC_37C	AATGATACCATTTTT	-0.266685	0.0311566	6	0.0560383	0.0919358			-0.149545	0.0561193	1	-0.290214	0.0251516	5
G7530_P1C04-SC_37C	G7530_P1C04	7530	P1C04	P1_SC_37C	SC_37C	ACAACCTACCTGCTA	0.00307344	0.00151358	10	0.0535047	0.0884451	-0.00161883	0.00469228	0.0029322	0.00229974	5	0.00318926	0.0020825	5
G7530_P1C04-SC_37C	G7530_P1C04	7530	P1C04	P1_SC_37C	SC_37C	ACAAGTTTTACAGTT	-0.0420665	0.00659952	10	0.00579191	0.0136985	0.021037	-0.0631035	-0.0332873	0.00976494	5	-0.0485333	0.00838086	5
G7530_P1C04-SC_37C	G7530_P1C04	7530	P1C04	P1_SC_37C	SC_37C	ACAGGGCAGCTCCCG	-0.0508839	0.00670358	10	0.000616918	0.0021353	-0.0292694	-0.0216145	-0.037148	0.0069224	5	-0.0656899	0.00718699	5
G7530_P1C04-SC_37C	G7530_P1C04	7530	P1C04	P1_SC_37C	SC_37C	ACAGTTGACGGACAG	0.00807817	0.00209695	10	0.0216542	0.0415032	0.00149213	0.00658604	0.00709772	0.00322285	5	0.00886452	0.00288626	5
G7530_P1C04-SC_37C	G7530_P1C04	7530	P1C04	P1_SC_37C	SC_37C	ACCACCGGTCCTGCC	-0.0258716	0.00456259	10	0.00315928	0.00822642	-0.00133408	-0.0245375	-0.0272979	0.00767317	5	-0.0250612	0.00578377	5
G7530_P1C04-SC_37C	G7530_P1C04	7530	P1C04	P1_SC_37C	SC_37C	AGAACATCATCTACA	-0.0857103	0.0191596	9	0.0113828	0.024351			-0.0937939	0.0155241	4	-0.0547336	0.0303892	5
G7530_P1C04-SC_37C	G7530_P1C04	7530	P1C04	P1_SC_37C	SC_37C	AGAAGACGACGATGA	-0.0142126	0.0028521	10	3.57202e-08	1.08999e-06	-0.0269064	0.0126938	-0.0213581	0.00202171	5	-0.00654635	0.00209408	5
G7530_P1C04-SC_37C	G7530_P1C04	7530	P1C04	P1_SC_37C	SC_37C	AGATTCATCCCATGG	-0.000901142	0.00207652	10	0.885536	0.911513	-0.00105522	0.000154079	-0.000369809	0.00376355	5	-0.00106944	0.00211816	5
G7530_P1C04-SC_37C	G7530_P1C04	7530	P1C04	P1_SC_37C	SC_37C	AGTGTATGATAATAT	-0.0216753	0.00178587	10	3.05575e-06	2.95159e-05	-0.01028	-0.0113953	-0.0210374	0.00197148	5	-0.0231732	0.00302116	5
G7530_P1C04-SC_37C	G7530_P1C04	7530	P1C04	P1_SC_37C	SC_37C	AGTGTTAATCAGACC	0.00630846	0.00406348	6	0.879847	0.906856	-0.0454435	0.0517519	0.000867099	0.00683523	3	0.00834768	0.00418438	3
G7530_P1C04-SC_37C	G7530_P1C04	7530	P1C04	P1_SC_37C	SC_37C	AGTTTATAAAAAATT	-0.0442921	0.006723	8	0.00775375	0.0176077	0.0647237	-0.109016	-0.0455978	0.00938689	3	-0.042822	0.00996029	5
G7530_P1C04-SC_37C	G7530_P1C04	7530	P1C04	P1_SC_37C	SC_37C	ATAGAGCGGCGTTGA	-0.00234454	0.00424449	10	0.0416004	0.0714781	-0.011058	0.00871349	-0.0117735	0.00604971	5	0.00199798	0.00410558	5
G7530_P1C04-SC_37C	G7530_P1C04	7530	P1C04	P1_SC_37C	SC_37C	ATATTGAGTAAGTAC	-0.00154986	0.00593614	9	0.190175	0.257697	0.00108997	-0.00263983	0.011413	0.0110095	4	-0.00358411	0.00436134	5
G7530_P1C04-SC_37C	G7530_P1C04	7530	P1C04	P1_SC_37C	SC_37C	ATCGTTGGCATTTGG	-0.0340675	0.00868724	10	0.00506612	0.0122327	-0.105906	0.0718383	-0.0463227	0.0157983	5	-0.0315989	0.00709039	5
G7530_P1C04-SC_37C	G7530_P1C04	7530	P1C04	P1_SC_37C	SC_37C	ATGAAGTTCATAATG	-0.0303144	0.00627857	3	0.174474	0.239589	0.0266474	-0.0569618	-0.025721	0.00743242	2	-0.039286	0.0103872	1
G7530_P1C04-SC_37C	G7530_P1C04	7530	P1C04	P1_SC_37C	SC_37C	ATGGCGATGGTCTTG	0.00591007	0.00268035	4	0.00675805	0.0156245	-0.00278687	0.00869694	0.0103475	0.00207039	2	0.00234674	0.00185531	2
G7530_P1C04-SC_37C	G7530_P1C04	7530	P1C04	P1_SC_37C	SC_37C	ATTATCAAGTGCCAG	-0.047457	0.00606203	10	0.0013357	0.00402681	-0.0673298	0.0198728	-0.0408199	0.00980998	5	-0.0511798	0.00734701	5
G7530_P1C04-SC_37C	G7530_P1C04	7530	P1C04	P1_SC_37C	SC_37C	ATTATCATCGCCATC	-0.102349	0.0257739	5	0.129666	0.18667	-0.0768754	-0.025474	-0.0522084	0.0306271	3	-0.104909	0.0069204	2
G7530_P1C04-SC_37C	G7530_P1C04	7530	P1C04	P1_SC_37C	SC_37C	CAAGGATCCCCGTAG	-0.00664132	0.0018604	8	0.0371585	0.0650482	-0.0256483	0.019007	-0.00650735	0.00221275	3	-0.00686263	0.00284404	5
G7530_P1C04-SC_37C	G7530_P1C04	7530	P1C04	P1_SC_37C	SC_37C	CAAGTTCGGCGAAAT	0.00438641	0.00876727	9	0.738472	0.790976	-0.00314285	0.00752925	0.00458043	0.00212553	4	-0.00616506	0.0156747	5
G7530_P1C04-SC_37C	G7530_P1C04	7530	P1C04	P1_SC_37C	SC_37C	CAATCTTGAATTGAT	0.00650574	0.00234809	10	0.00198531	0.0055736	0.0141933	-0.00768754	0.00993311	0.00261773	5	0.00193851	0.00302184	5
G7530_P1C04-SC_37C	G7530_P1C04	7530	P1C04	P1_SC_37C	SC_37C	CAATTTCAACGTTGT	-0.115203	0.00947547	9	0.000103497	0.000493216	-0.0641989	-0.0510039	-0.107786	0.0107064	4	-0.128194	0.0141699	5
G7530_P1C04-SC_37C	G7530_P1C04	7530	P1C04	P1_SC_37C	SC_37C	CATATGCATTCCTTG	0.00274812	0.00200856	10	0.52143	0.598218	-0.00930645	0.0120546	0.00155726	0.00343942	5	0.00327419	0.00228602	5
G7530_P1C04-SC_37C	G7530_P1C04	7530	P1C04	P1_SC_37C	SC_37C	CATCAATGAGGCAGT	-0.149382	0.0118139	10	1.48134e-05	0.000103494	-0.170366	0.0209839	-0.125114	0.014085	5	-0.170373	0.0130994	5
G7530_P1C04-SC_37C	G7530_P1C04	7530	P1C04	P1_SC_37C	SC_37C	CATTTATGGCTATCT	-0.0301604	0.00608947	8	0.0216877	0.0415525	-0.0900852	0.0599248	-0.0270287	0.00783943	4	-0.0352011	0.00994586	4
G7530_P1C04-SC_37C	G7530_P1C04	7530	P1C04	P1_SC_37C	SC_37C	CCAACACAGGCTTCG	-0.0180862	0.00527383	9	0.00124271	0.0038101	0.00488293	-0.0229691	-0.0269892	0.0045741	4	-0.00526175	0.00548979	5
G7530_P1C04-SC_37C	G7530_P1C04	7530	P1C04	P1_SC_37C	SC_37C	CCAAGACCGTGTAAA	-0.131189	0.0333763	5	0.437114	0.517548	-0.232802	0.101613	-0.067727	0.075762	1	-0.147083	0.037915	4
G7530_P1C04-SC_37C	G7530_P1C04	7530	P1C04	P1_SC_37C	SC_37C	CCAGGATGTACCGCC	-0.0125518	0.0019141	7	0.00411951	0.0102757	-0.104767	0.0922148	-0.00972619	0.00307278	3	-0.0139906	0.0021927	4
G7530_P1C04-SC_37C	G7530_P1C04	7530	P1C04	P1_SC_37C	SC_37C	CCGTTAGTATCGCTA	0.0109639	0.00632798	7	0.995908	0.996603	-0.019524	0.0304879	-3.89724e-05	0.00858403	4	0.0163556	0.00600894	3
G7530_P1C04-SC_37C	G7530_P1C04	7530	P1C04	P1_SC_37C	SC_37C	CGAACAGAAACACAA	0.0145221	0.0066514	5	0.403774	0.48347	-0.0509589	0.065481	-0.0077605	0.00818629	1	0.0209498	0.00439674	4
G7530_P1C04-SC_37C	G7530_P1C04	7530	P1C04	P1_SC_37C	SC_37C	CGAATGCCATACAAA	0.0127816	0.00252863	9	0.00452377	0.0111217	-0.0187919	0.0315735	0.0140476	0.00328034	4	0.0110173	0.00387243	5
G7530_P1C04-SC_37C	G7530_P1C04	7530	P1C04	P1_SC_37C	SC_37C	CGATGATGATGATGA	0.00272648	0.00210837	10	0.438498	0.518842	-0.00559316	0.00831964	0.00205592	0.00279235	5	0.00368857	0.00334472	5
G7530_P1C04-SC_37C	G7530_P1C04	7530	P1C04	P1_SC_37C	SC_37C	CGCGATCAATCCTCT	-0.0297279	0.0490177	3	0.38302	0.463007	-0.0319146	0.00218678	-0.0701039	0.048161	2	0.0509792	0.0680909	1
G7530_P1C04-SC_37C	G7530_P1C04	7530	P1C04	P1_SC_37C	SC_37C	CTAAGCAGTCTTCTC	-0.0334114	0.00472321	10	0.000775045	0.0025727	-0.133331	0.0999192	-0.0342621	0.00345416	5	-0.0277389	0.00891951	5
G7530_P1C04-SC_37C	G7530_P1C04	7530	P1C04	P1_SC_37C	SC_37C	CTACTTACAACGGAA	0.0114697	0.00354995	8	0.00387078	0.00975486	2.16745e-05	0.011448	0.0136894	0.00212116	4	0.00168621	0.00445317	4
G7530_P1C04-SC_37C	G7530_P1C04	7530	P1C04	P1_SC_37C	SC_37C	CTAGTTGTATAGCCA	-0.00637861	0.00689539	8	0.0628631	0.101331	-0.0228617	0.016483	-0.0196779	0.010783	4	-0.00191031	0.00625025	4
G7530_P1C04-SC_37C	G7530_P1C04	7530	P1C04	P1_SC_37C	SC_37C	CTATCAAGGCTTAAT	-0.00300872	0.00923463	10	0.961577	0.970458	0.0109081	-0.0139168	0.000551583	0.00586649	5	-0.0255772	0.0147702	5
G7530_P1C04-SC_37C	G7530_P1C04	7530	P1C04	P1_SC_37C	SC_37C	CTCGCTAATACTCCT	-0.012287	0.00201706	10	0.000325297	0.00125495	-0.0375804	0.0252933	-0.0102562	0.00198225	5	-0.0165208	0.00286208	5
G7530_P1C04-SC_37C	G7530_P1C04	7530	P1C04	P1_SC_37C	SC_37C	CTCTTGAGAATACTT	-0.0651671	0.00771003	10	0.0002589	0.00103402	-0.0948968	0.0297297	-0.0567818	0.00752648	5	-0.0825257	0.0108291	5
G7530_P1C04-SC_37C	G7530_P1C04	7530	P1C04	P1_SC_37C	SC_37C	CTGATTTGTGCTGTC	-0.0349206	0.0192786	6	0.256611	0.331564	0.0375917	-0.0725123	-0.0341502	0.00301151	2	-0.0728888	0.0211416	4
G7530_P1C04-SC_37C	G7530_P1C04	7530	P1C04	P1_SC_37C	SC_37C	CTTGATCAATCAAAA	-0.0412736	0.00250761	10	7.46459e-08	1.81651e-06	-0.0824445	0.0411709	-0.0369229	0.00245815	5	-0.047162	0.00285976	5
G7530_P1C04-SC_37C	G7530_P1C04	7530	P1C04	P1_SC_37C	SC_37C	CTTGCAAGTGTAATT	0.0112952	0.00202813	10	0.00412594	0.0102835	0.000560442	0.0107348	0.00757572	0.00301853	5	0.0131087	0.0021077	5
G7530_P1C04-SC_37C	G7530_P1C04	7530	P1C04	P1_SC_37C	SC_37C	GAACTCAGGTTCCAT	-0.01357	0.0081232	7	0.297036	0.374512	-0.0442945	0.0307244	-0.0175904	0.00716505	2	-0.00474319	0.0106167	5
G7530_P1C04-SC_37C	G7530_P1C04	7530	P1C04	P1_SC_37C	SC_37C	GAGAATGAAGGACAG	-0.0461865	0.00245133	10	1.06489e-08	4.78895e-07	0.00446468	-0.0506511	-0.0423756	0.00217848	5	-0.0525366	0.00281213	5
G7530_P1C04-SC_37C	G7530_P1C04	7530	P1C04	P1_SC_37C	SC_37C	GAGTGCTTCAAAGTT	0.0126205	0.00189301	10	0.000427577	0.00157426	0.0186933	-0.00607281	0.0118882	0.00224091	5	0.0140476	0.0031282	5
G7530_P1C04-SC_37C	G7530_P1C04	7530	P1C04	P1_SC_37C	SC_37C	GCAAGAAAGAAACCC	-0.0246688	0.0193423	5	0.195913	0.264008	-0.0257965	0.00112771	-0.0236689	0.00407409	3	-0.0776516	0.0296567	2
G7530_P1C04-SC_37C	G7530_P1C04	7530	P1C04	P1_SC_37C	SC_37C	GCCCTCGAAACCTAT	-0.0995102	0.0102499	8	0.000729941	0.00245025	-0.0598668	-0.0396434	-0.108873	0.0166466	3	-0.0931679	0.0137009	5
G7530_P1C04-SC_37C	G7530_P1C04	7530	P1C04	P1_SC_37C	SC_37C	GCTGCTTATGAGGAT	0.00274516	0.00205601	10	0.091045	0.138972	-0.0056472	0.00839236	0.00392057	0.00187858	5	-0.000942719	0.00332754	5
G7530_P1C04-SC_37C	G7530_P1C04	7530	P1C04	P1_SC_37C	SC_37C	GGTGGAAGTAGCAGT	0.00629707	0.00240642	8	0.108538	0.160805	0.00243518	0.00386189	0.00546682	0.00227505	4	0.00917301	0.00423427	4
G7530_P1C04-SC_37C	G7530_P1C04	7530	P1C04	P1_SC_37C	SC_37C	GGTTGCCCAGAAGTA	-0.0376432	0.00276575	10	7.8927e-06	6.27838e-05	-0.0194968	-0.0181464	-0.0374176	0.00447313	5	-0.0377979	0.00370396	5
G7530_P1C04-SC_37C	G7530_P1C04	7530	P1C04	P1_SC_37C	SC_37C	GTAATCTGACTCTAG	-0.0181947	0.007571	10	0.046894	0.0792079	0.0077402	-0.0259349	-0.0252045	0.0114378	5	-0.0125107	0.0102996	5
G7530_P1C04-SC_37C	G7530_P1C04	7530	P1C04	P1_SC_37C	SC_37C	GTACAAGAAATTTTG	-0.00215716	0.0069858	6	0.681125	0.74291	-0.0434344	0.0412772	-0.00475856	0.0120049	3	-0.000467081	0.00967629	3
G7530_P1C04-SC_37C	G7530_P1C04	7530	P1C04	P1_SC_37C	SC_37C	GTCACCGGCACTAAC	0.0208911	0.00603403	7	0.205264	0.274825	-0.0259069	0.046798	0.0163959	0.00707454	2	0.0264634	0.00787673	5
G7530_P1C04-SC_37C	G7530_P1C04	7530	P1C04	P1_SC_37C	SC_37C	GTGTGATTACTAAAT	-0.00158574	0.00478086	10	0.224046	0.295938	-0.0108598	0.00927401	-0.00846576	0.00807743	5	0.000898429	0.00485366	5
G7530_P1C04-SC_37C	G7530_P1C04	7530	P1C04	P1_SC_37C	SC_37C	GTTAAATCAACAGTT	-0.00958969	0.00288179	10	0.0645034	0.10356	-0.0412742	0.0316845	-0.00772459	0.00326553	5	-0.0133668	0.00464713	5
G7530_P1C04-SC_37C	G7530_P1C04	7530	P1C04	P1_SC_37C	SC_37C	GTTCAGCTTTGATCG	-0.31267	0.0220045	5	0.0125268	0.0263414	-0.124119	-0.188551	-0.273464	0.0507853	1	-0.322511	0.0254433	4
G7530_P1C04-SC_37C	G7530_P1C04	7530	P1C04	P1_SC_37C	SC_37C	GTTGAACTGGTTGTT	0.045736	0.00163956	9	9.95255e-09	4.69617e-07	-0.0331275	0.0788635	0.0435938	0.00258418	4	0.0469855	0.0019736	5
G7530_P1C04-SC_37C	G7530_P1C04	7530	P1C04	P1_SC_37C	SC_37C	GTTGGGCGCTTAAAG	0.00239736	0.0022954	10	0.0403545	0.0697124	-0.00339134	0.0057887	0.00533396	0.00249637	5	-0.00211057	0.00309297	5
G7530_P1C04-SC_37C	G7530_P1C04	7530	P1C04	P1_SC_37C	SC_37C	GTTTAGCTTCCGTTG	-0.000648653	0.00492487	10	0.823848	0.862554	0.000432998	-0.00108165	-0.00163616	0.00622351	5	0.00110357	0.00829011	5
G7530_P1C04-SC_37C	G7530_P1C04	7530	P1C04	P1_SC_37C	SC_37C	GTTTGTTTTGGGAAA	-0.18348	0.0168592	4	0.0143893	0.0295008	-0.140287	-0.0431926	-0.221609	0.026929	1	-0.170648	0.0156222	3
G7530_P1C04-SC_37C	G7530_P1C04	7530	P1C04	P1_SC_37C	SC_37C	TAACCTCGCGCTGAG	-0.0172849	0.0104586	8	0.476249	0.554763	0.0247705	-0.0420554	0.00787516	0.0117393	4	-0.0325121	0.00913266	4
G7530_P1C04-SC_37C	G7530_P1C04	7530	P1C04	P1_SC_37C	SC_37C	TACACCAATTACACT	-0.186671	0.0191111	7	0.00131279	0.00397701			-0.119616	0.019537	2	-0.210611	0.0116736	5
G7530_P1C04-SC_37C	G7530_P1C04	7530	P1C04	P1_SC_37C	SC_37C	TAGACGGACATCTTC	0.00440368	0.00537993	6	0.0403154	0.0696544	0.0214085	-0.0170048	0.0165029	0.00748394	3	0.00199276	0.00334075	3
G7530_P1C04-SC_37C	G7530_P1C04	7530	P1C04	P1_SC_37C	SC_37C	TATATTGAACTTTAC	-0.0163078	0.00200283	10	0.000149916	0.000665778	0.0115448	-0.0278527	-0.0155834	0.0027309	5	-0.0172375	0.00309365	5
G7530_P1C04-SC_37C	G7530_P1C04	7530	P1C04	P1_SC_37C	SC_37C	TATGCCCTTCTTCTG	-0.0183986	0.00453792	10	0.0421575	0.0723057	0.00616433	-0.0245629	-0.0140619	0.00525907	5	-0.025674	0.00681174	5
G7530_P1C04-SC_37C	G7530_P1C04	7530	P1C04	P1_SC_37C	SC_37C	TCAAAACGGAGTGTT	0.00179431	0.00155268	10	0.40026	0.480073	-0.00120033	0.00299464	0.0012222	0.00243597	5	0.00219136	0.00202933	5
G7530_P1C04-SC_37C	G7530_P1C04	7530	P1C04	P1_SC_37C	SC_37C	TCAAAGCATGAAAAA	0.0238752	0.00235999	10	5.01687e-07	7.40463e-06	-0.086374	0.110249	0.0177846	0.00227432	5	0.0287074	0.0020258	5
G7530_P1C04-SC_37C	G7530_P1C04	7530	P1C04	P1_SC_37C	SC_37C	TCAAATGATGAGGAT	-0.0197418	0.0045886	10	0.0131201	0.0273259	0.0191963	-0.0389381	-0.0209113	0.00626944	5	-0.0181415	0.00733386	5
G7530_P1C04-SC_37C	G7530_P1C04	7530	P1C04	P1_SC_37C	SC_37C	TCAACAACCTATGCA	4.24245e-05	0.00237793	9	0.335534	0.414246	0.0238632	-0.0238208	0.0031263	0.00470571	4	-0.000597967	0.00214437	5
G7530_P1C04-SC_37C	G7530_P1C04	7530	P1C04	P1_SC_37C	SC_37C	TCATAGGTATCTCGC	0.00527899	0.0015057	10	0.000463349	0.00168313	-0.00351693	0.00879593	0.00629147	0.00187918	5	0.00379195	0.00227739	5
G7530_P1C04-SC_37C	G7530_P1C04	7530	P1C04	P1_SC_37C	SC_37C	TCGAAAGCACAGTAG	-0.0839267	0.00883477	8	0.00074397	0.00249197	-0.135006	0.0510795	-0.0842028	0.0128755	4	-0.0835978	0.0140526	4
G7530_P1C04-SC_37C	G7530_P1C04	7530	P1C04	P1_SC_37C	SC_37C	TCGATAGAATTTACT	-0.0351711	0.011497	8	0.0465032	0.0786088	-0.0242833	-0.0108878	-0.0481654	0.0221004	3	-0.0300728	0.0138431	5
G7530_P1C04-SC_37C	G7530_P1C04	7530	P1C04	P1_SC_37C	SC_37C	TCTTGGAGGTGAATG	-0.0271954	0.0142354	10	0.262284	0.337393	-0.0830805	0.0558852	-0.0241818	0.0103345	5	-0.0470488	0.0265258	5
G7530_P1C04-SC_37C	G7530_P1C04	7530	P1C04	P1_SC_37C	SC_37C	TGATCATCACGGGAC	-0.0239552	0.00610439	10	0.0330154	0.05893	-0.0208832	-0.00307193	-0.0180221	0.00548514	5	-0.0386195	0.00862341	5
G7530_P1C04-SC_37C	G7530_P1C04	7530	P1C04	P1_SC_37C	SC_37C	TGGAGTCTTTGTTGA	-0.0520814	0.00421445	9	3.48077e-05	0.000204775	-0.063193	0.0111116	-0.0572014	0.00950032	4	-0.0518508	0.00201612	5
G7530_P1C04-SC_37C	G7530_P1C04	7530	P1C04	P1_SC_37C	SC_37C	TTAATTAGAGGTATG	-0.00737368	0.00345292	10	0.0179654	0.0355117	-0.0312409	0.0238673	-0.0123649	0.00457479	5	-0.0025838	0.00448155	5
G7530_P1C04-SC_37C	G7530_P1C04	7530	P1C04	P1_SC_37C	SC_37C	TTAATTGCACTTATG	-0.0210352	0.0100826	8	0.207262	0.277143	-0.072662	0.0516268	-0.0215879	0.0120148	4	-0.0197774	0.0181243	4
G7530_P1C04-SC_37C	G7530_P1C04	7530	P1C04	P1_SC_37C	SC_37C	TTAGTCTTTCCATCA	-0.26357	0.0115258	10	1.81698e-07	3.43462e-06	-0.204752	-0.0588175	-0.24677	0.014945	5	-0.280796	0.0151334	5
G7530_P1C04-SC_37C	G7530_P1C04	7530	P1C04	P1_SC_37C	SC_37C	TTATATTTATTTGCT	0.00362973	0.00194441	10	0.800832	0.843919	-0.0146704	0.0183002	0.000478102	0.00285726	5	0.00549199	0.00219635	5
G7530_P1C04-SC_37C	G7530_P1C04	7530	P1C04	P1_SC_37C	SC_37C	TTTAACTCACCGTAA	0.0220475	0.00503344	10	0.0257269	0.0479032	-0.0171085	0.039156	0.0198406	0.00834435	5	0.0233801	0.00648419	5
G7530_P1C04-SC_37C	G7530_P1C04	7530	P1C04	P1_SC_37C	SC_37C	TTTATAAATCAATAG	0.00651414	0.00134773	10	3.82782e-05	0.000221862	0.00352976	0.00298438	0.00607911	0.00182127	5	0.00704702	0.00201571	5
G7530_P1C04-SC_37C	G7530_P1C04	7530	P1C04	P1_SC_37C	SC_37C	TTTTGCATTTAGGCG	-0.0568034	0.00462109	10	2.71617e-05	0.000167865	-0.0117231	-0.0450803	-0.0465782	0.00693093	5	-0.0605702	0.00420673	5
G7530_P1C04-SC_37C	G7530_P1C04	7530	P1C04	P1_SC_37C	SC_37C	GCTGCGGAGCCTCAG	-0.122515	0.0258116	3	0.0414396	0.0712411						-0.122515	0.0258116	3
G5150_P1C04-SC_37C	G5150_P1C04	5150	P1C04	P1_SC_37C	SC_37C	AAAACATTATCAAAG	-0.00225255	0.00184846	10	0.00467656	0.0114474	-0.000652642	-0.0015999	-0.00592193	0.00162008	5	0.00256214	0.00185577	5
G5150_P1C04-SC_37C	G5150_P1C04	5150	P1C04	P1_SC_37C	SC_37C	AAAAGAAAAATGTAT	-0.0142419	0.0053703	10	0.0024082	0.00654872	0.0418506	-0.0560925	0.00578042	0.0018149	5	-0.0241393	0.00127601	5
G5150_P1C04-SC_37C	G5150_P1C04	5150	P1C04	P1_SC_37C	SC_37C	AAAAGCGACATTTCT	-0.0173387	0.00372181	8	0.0766205	0.120209	-0.0616103	0.0442716	-0.0102449	0.00651851	4	-0.0181645	0.0022241	4
G5150_P1C04-SC_37C	G5150_P1C04	5150	P1C04	P1_SC_37C	SC_37C	ACAACCTACCTGCTA	0.000683164	0.00109261	10	0.656345	0.720984	-0.00161883	0.002302	0.000638021	0.00118536	5	0.000805804	0.00195375	5
G5150_P1C04-SC_37C	G5150_P1C04	5150	P1C04	P1_SC_37C	SC_37C	ACAAGTTTTACAGTT	-0.00937087	0.00809934	10	0.253634	0.328363	0.021037	-0.0304078	0.00353557	0.00230413	5	-0.0400612	0.00355308	5
G5150_P1C04-SC_37C	G5150_P1C04	5150	P1C04	P1_SC_37C	SC_37C	ACAGGGCAGCTCCCG	-0.0317668	0.00537262	9	0.00131444	0.00398005	-0.0292694	-0.0024974	-0.0359022	0.00625562	5	-0.0235317	0.00882768	4
G5150_P1C04-SC_37C	G5150_P1C04	5150	P1C04	P1_SC_37C	SC_37C	ACAGTTGACGGACAG	0.00181382	0.000988666	10	0.530445	0.606438	0.00149213	0.000321687	0.000715201	0.00147817	5	0.00262014	0.00126636	5
G5150_P1C04-SC_37C	G5150_P1C04	5150	P1C04	P1_SC_37C	SC_37C	ACCACCGGTCCTGCC	-0.0281543	0.00546895	10	0.0181737	0.0358609	-0.00133408	-0.0268202	-0.00622757	0.00294725	5	-0.0321462	0.00125753	5
G5150_P1C04-SC_37C	G5150_P1C04	5150	P1C04	P1_SC_37C	SC_37C	AGAACATCATCTACA	-0.0760692	0.0157196	8	0.0186688	0.0366151			-0.0733002	0.0065856	3	-0.105509	0.0214737	5
G5150_P1C04-SC_37C	G5150_P1C04	5150	P1C04	P1_SC_37C	SC_37C	AGAAGACGACGATGA	-0.0213621	0.00494416	10	0.00797786	0.0180362	-0.0269064	0.00554428	-0.00393577	0.00155247	5	-0.0323185	0.00123099	5
G5150_P1C04-SC_37C	G5150_P1C04	5150	P1C04	P1_SC_37C	SC_37C	AGATTCATCCCATGG	-0.00598631	0.00736084	10	0.454163	0.533426	-0.00105522	-0.00493109	-0.00862329	0.0134975	5	-0.00512412	0.00771793	5
G5150_P1C04-SC_37C	G5150_P1C04	5150	P1C04	P1_SC_37C	SC_37C	AGTGTATGATAATAT	-0.0353535	0.00267143	10	6.60577e-07	9.19419e-06	-0.01028	-0.0250735	-0.0271972	0.00235349	5	-0.0404015	0.00185153	5
G5150_P1C04-SC_37C	G5150_P1C04	5150	P1C04	P1_SC_37C	SC_37C	AGTGTTAATCAGACC	0.00508395	0.00537233	10	0.0133988	0.027758	-0.0454435	0.0505274	-0.0136677	0.005725	5	0.00854694	0.00246026	5
G5150_P1C04-SC_37C	G5150_P1C04	5150	P1C04	P1_SC_37C	SC_37C	AGTTTATAAAAAATT	-0.00422474	0.00827339	10	0.800175	0.843441	0.0647237	-0.0689484	0.000713379	0.00144035	5	-0.0380186	0.00376795	5
G5150_P1C04-SC_37C	G5150_P1C04	5150	P1C04	P1_SC_37C	SC_37C	ATAATTTTCATCCAC	-0.0242329	0.0087729	3	0.419855	0.499965	-0.0111715	-0.0130614	-0.00759491	0.00593336	1	-0.0328414	0.0042679	2
G5150_P1C04-SC_37C	G5150_P1C04	5150	P1C04	P1_SC_37C	SC_37C	ATAGAGCGGCGTTGA	-0.020231	0.00229274	9	0.000152869	0.000675278	-0.011058	-0.00917292	-0.023589	0.0035625	4	-0.0181377	0.0028127	5
G5150_P1C04-SC_37C	G5150_P1C04	5150	P1C04	P1_SC_37C	SC_37C	ATATTGAGTAAGTAC	-0.00203544	0.00133914	8	0.593931	0.664625	0.00108997	-0.00312541	-0.00115517	0.00203132	3	-0.0028014	0.00189484	5
G5150_P1C04-SC_37C	G5150_P1C04	5150	P1C04	P1_SC_37C	SC_37C	ATCGTTGGCATTTGG	-0.0597996	0.0231081	6	0.137384	0.196127	-0.105906	0.0461062	-0.049397	0.0233636	4	-0.105712	0.0490833	2
G5150_P1C04-SC_37C	G5150_P1C04	5150	P1C04	P1_SC_37C	SC_37C	ATGGCGATGGTCTTG	-0.00217549	0.00175038	10	0.554589	0.629133	-0.00278687	0.000611377	-0.00151789	0.0032758	5	-0.00234679	0.00167188	5
G5150_P1C04-SC_37C	G5150_P1C04	5150	P1C04	P1_SC_37C	SC_37C	ATTATCAAGTGCCAG	-0.0722483	0.0086535	10	0.000167426	0.000726192	-0.0673298	-0.00491847	-0.0454215	0.00778057	5	-0.087881	0.00593943	5
G5150_P1C04-SC_37C	G5150_P1C04	5150	P1C04	P1_SC_37C	SC_37C	ATTATCATCGCCATC	-0.038263	0.0296565	6	0.122942	0.178662	-0.0768754	0.0386124	-0.0333745	0.00928014	4	-0.142169	0.0427844	2
G5150_P1C04-SC_37C	G5150_P1C04	5150	P1C04	P1_SC_37C	SC_37C	CAAGGATCCCCGTAG	-0.00884151	0.00203681	8	0.022469	0.0427976	-0.0256483	0.0168068	-0.0100009	0.00242287	3	-0.00707518	0.00299054	5
G5150_P1C04-SC_37C	G5150_P1C04	5150	P1C04	P1_SC_37C	SC_37C	CAAGTTCGGCGAAAT	-0.0016413	0.00315305	9	0.318018	0.396115	-0.00314285	0.00150154	-0.00396144	0.00228277	4	0.0059637	0.00413289	5
G5150_P1C04-SC_37C	G5150_P1C04	5150	P1C04	P1_SC_37C	SC_37C	CAATCTTGAATTGAT	0.00423017	0.00146324	10	0.0349571	0.0617587	0.0141933	-0.00996312	0.00472368	0.00126644	5	0.00215415	0.00259748	5
G5150_P1C04-SC_37C	G5150_P1C04	5150	P1C04	P1_SC_37C	SC_37C	CAATTTCAACGTTGT	-0.115912	0.0129439	8	0.00108367	0.00339092	-0.0641989	-0.0517132	-0.114146	0.0115908	4	-0.124115	0.0249772	4
G5150_P1C04-SC_37C	G5150_P1C04	5150	P1C04	P1_SC_37C	SC_37C	CATATGCATTCCTTG	0.00229019	0.00312314	10	0.0503375	0.0841232	-0.00930645	0.0115966	-0.00714541	0.0041685	5	0.00408603	0.00181857	5
G5150_P1C04-SC_37C	G5150_P1C04	5150	P1C04	P1_SC_37C	SC_37C	CATTGTCGGACGCTT	0.00789755	0.0204647	5	0.0939745	0.142796	0.0853687	-0.0774711	0.0115644	0.00227016	3	-0.055835	0.00946439	2
G5150_P1C04-SC_37C	G5150_P1C04	5150	P1C04	P1_SC_37C	SC_37C	CATTTATGGCTATCT	-0.0312253	0.00639665	8	0.0376641	0.0657452	-0.0900852	0.0588599	-0.0297423	0.00947594	3	-0.0326597	0.00931963	5
G5150_P1C04-SC_37C	G5150_P1C04	5150	P1C04	P1_SC_37C	SC_37C	CCAACACAGGCTTCG	-0.0236977	0.00648186	10	0.627381	0.695743	0.00488293	-0.0285806	-0.00317166	0.00827461	5	-0.0272728	0.00345338	5
G5150_P1C04-SC_37C	G5150_P1C04	5150	P1C04	P1_SC_37C	SC_37C	CCAAGACCGTGTAAA	-0.116933	0.0423148	7	0.0577802	0.0943957	-0.232802	0.115869	-0.115269	0.00422262	2	-0.219974	0.0332258	5
G5150_P1C04-SC_37C	G5150_P1C04	5150	P1C04	P1_SC_37C	SC_37C	CCAGGATGTACCGCC	-0.0508042	0.00907481	8	1.06006e-05	7.97416e-05	-0.104767	0.0539623	-0.0775931	0.00711071	5	-0.0501429	0.00111727	3
G5150_P1C04-SC_37C	G5150_P1C04	5150	P1C04	P1_SC_37C	SC_37C	CCGTTAGTATCGCTA	0.00192342	0.00268241	9	0.728531	0.782858	-0.019524	0.0214474	-0.00140819	0.00423904	4	0.00408927	0.00341786	5
G5150_P1C04-SC_37C	G5150_P1C04	5150	P1C04	P1_SC_37C	SC_37C	CGAACAGAAACACAA	-0.0216965	0.0147729	5	0.00145931	0.00432546	-0.0509589	0.0292624	-0.0565733	0.00574749	3	-0.00610945	0.00384231	2
G5150_P1C04-SC_37C	G5150_P1C04	5150	P1C04	P1_SC_37C	SC_37C	CGAATGCCATACAAA	-0.00773244	0.0049953	7	0.149134	0.210259	-0.0187919	0.0110595	-0.00744426	0.00189944	5	-0.024404	0.0144471	2
G5150_P1C04-SC_37C	G5150_P1C04	5150	P1C04	P1_SC_37C	SC_37C	CGATGATGATGATGA	0.000185282	0.00138628	10	0.146183	0.206721	-0.00559316	0.00577845	-0.00248868	0.00200413	5	0.00163284	0.00147457	5
G5150_P1C04-SC_37C	G5150_P1C04	5150	P1C04	P1_SC_37C	SC_37C	CGCGATCAATCCTCT	-0.0107452	0.00959381	8	0.441687	0.521674	-0.0319146	0.0211694	-0.0116976	0.00638487	4	-0.00223827	0.0190822	4
G5150_P1C04-SC_37C	G5150_P1C04	5150	P1C04	P1_SC_37C	SC_37C	CTAAGCAGTCTTCTC	-0.0444213	0.00173009	10	8.86697e-08	2.03801e-06	-0.133331	0.0889093	-0.0441387	0.00262192	5	-0.044685	0.00253219	5
G5150_P1C04-SC_37C	G5150_P1C04	5150	P1C04	P1_SC_37C	SC_37C	CTACTTACAACGGAA	0.0078904	0.00135533	10	0.00402293	0.0100751	2.16745e-05	0.00786873	0.00654419	0.00168802	5	0.00975571	0.00198699	5
G5150_P1C04-SC_37C	G5150_P1C04	5150	P1C04	P1_SC_37C	SC_37C	CTAGTTGTATAGCCA	-0.00886765	0.019094	5	0.837667	0.873572	-0.0228617	0.013994	0.00722498	0.030562	2	-0.0215639	0.027146	3
G5150_P1C04-SC_37C	G5150_P1C04	5150	P1C04	P1_SC_37C	SC_37C	CTATCAAGGCTTAAT	0.00179621	0.00267068	10	0.133379	0.191285	0.0109081	-0.00911191	0.00476305	0.00229901	5	-0.00515526	0.00351911	5
G5150_P1C04-SC_37C	G5150_P1C04	5150	P1C04	P1_SC_37C	SC_37C	CTCGCTAATACTCCT	-0.015221	0.00159227	10	2.15868e-07	3.89155e-06	-0.0375804	0.0223594	-0.0176815	0.00112924	5	-0.0103437	0.00158985	5
G5150_P1C04-SC_37C	G5150_P1C04	5150	P1C04	P1_SC_37C	SC_37C	CTCTTGAGAATACTT	-0.0578834	0.00366695	10	2.44151e-06	2.46866e-05	-0.0948968	0.0370134	-0.0523458	0.00426106	5	-0.0647855	0.0047572	5
G5150_P1C04-SC_37C	G5150_P1C04	5150	P1C04	P1_SC_37C	SC_37C	CTGATTTGTGCTGTC	-0.0138521	0.0088702	6	0.456208	0.535423	0.0375917	-0.0514439	-0.011411	0.0128798	3	-0.0170751	0.0147994	3
G5150_P1C04-SC_37C	G5150_P1C04	5150	P1C04	P1_SC_37C	SC_37C	CTTGATCAATCAAAA	-0.0669059	0.00366344	10	7.46397e-07	1.00518e-05	-0.0824445	0.0155386	-0.0572129	0.00550044	5	-0.0687248	0.00238273	5
G5150_P1C04-SC_37C	G5150_P1C04	5150	P1C04	P1_SC_37C	SC_37C	CTTGCAAGTGTAATT	0.00243776	0.00144584	10	0.109697	0.162292	0.000560442	0.00187732	0.00340837	0.00190521	5	0.00111232	0.0022264	5
G5150_P1C04-SC_37C	G5150_P1C04	5150	P1C04	P1_SC_37C	SC_37C	GAACTCAGGTTCCAT	-0.0280156	0.00359528	10	0.000968294	0.00308571	-0.0442945	0.0162788	-0.0261943	0.00452449	5	-0.0310747	0.00586359	5
G5150_P1C04-SC_37C	G5150_P1C04	5150	P1C04	P1_SC_37C	SC_37C	GAGAATGAAGGACAG	-0.0447095	0.00664309	10	2.32043e-08	8.3542e-07	0.00446468	-0.0491741	-0.0332094	0.00139185	5	-0.0699437	0.00206176	5
G5150_P1C04-SC_37C	G5150_P1C04	5150	P1C04	P1_SC_37C	SC_37C	GAGTGCTTCAAAGTT	0.00964517	0.000922433	10	6.77478e-06	5.55642e-05	0.0186933	-0.00904818	0.0104519	0.00148124	5	0.00917751	0.00112776	5
G5150_P1C04-SC_37C	G5150_P1C04	5150	P1C04	P1_SC_37C	SC_37C	GCAAGAAAGAAACCC	-0.0482925	0.00871829	3	0.279012	0.35553	-0.0257965	-0.0224961	-0.0401191	0.0188168	1	-0.0523934	0.0133285	2
G5150_P1C04-SC_37C	G5150_P1C04	5150	P1C04	P1_SC_37C	SC_37C	GCCCTCGAAACCTAT	-0.136441	0.0335733	5	0.100367	0.150545	-0.0598668	-0.0765745	-0.0890145	0.0307931	2	-0.19249	0.0334752	3
G5150_P1C04-SC_37C	G5150_P1C04	5150	P1C04	P1_SC_37C	SC_37C	GCTGCTTATGAGGAT	-0.00311017	0.00179122	10	0.835976	0.872246	-0.0056472	0.00253703	-0.00048253	0.00257066	5	-0.00508971	0.00223123	5
G5150_P1C04-SC_37C	G5150_P1C04	5150	P1C04	P1_SC_37C	SC_37C	GGTGGAAGTAGCAGT	0.00782107	0.00158964	5	0.118379	0.17298	0.00243518	0.00538589	0.00353104	0.00178241	1	0.00989996	0.00124078	4
G5150_P1C04-SC_37C	G5150_P1C04	5150	P1C04	P1_SC_37C	SC_37C	GGTTGCCCAGAAGTA	-0.0196856	0.00374114	10	0.0402808	0.0696044	-0.0194968	-0.00018874	-0.00901067	0.00444013	5	-0.0244877	0.00297804	5
G5150_P1C04-SC_37C	G5150_P1C04	5150	P1C04	P1_SC_37C	SC_37C	GTAATCTGACTCTAG	-0.0159379	0.00917588	9	0.741543	0.793523	0.0077402	-0.0236781	-0.00283498	0.00738466	5	-0.0423495	0.0104844	4
G5150_P1C04-SC_37C	G5150_P1C04	5150	P1C04	P1_SC_37C	SC_37C	GTACAAGAAATTTTG	-0.0208053	0.00459602	9	0.00276267	0.00734255	-0.0434344	0.022629	-0.0254994	0.00527874	5	-0.0126301	0.00696633	4
G5150_P1C04-SC_37C	G5150_P1C04	5150	P1C04	P1_SC_37C	SC_37C	GTCACCGGCACTAAC	0.000544566	0.00804207	10	0.153312	0.215166	-0.0259069	0.0264515	-0.0164395	0.0144222	5	0.00140925	0.00325417	5
G5150_P1C04-SC_37C	G5150_P1C04	5150	P1C04	P1_SC_37C	SC_37C	GTGTGATTACTAAAT	-0.00908863	0.00475943	10	0.926429	0.94401	-0.0108598	0.00177112	0.000589075	0.00822504	5	-0.0105466	0.00319249	5
G5150_P1C04-SC_37C	G5150_P1C04	5150	P1C04	P1_SC_37C	SC_37C	GTTAAATCAACAGTT	-0.00972267	0.00144939	10	0.000867283	0.00282377	-0.0412742	0.0315515	-0.0101871	0.00223044	5	-0.00932687	0.00205903	5
G5150_P1C04-SC_37C	G5150_P1C04	5150	P1C04	P1_SC_37C	SC_37C	GTTCAGCTTTGATCG	-0.185806	0.0374628	10	2.33652e-05	0.000149185	-0.124119	-0.0616871	-0.149366	0.0108125	5	-0.332711	0.0217099	5
G5150_P1C04-SC_37C	G5150_P1C04	5150	P1C04	P1_SC_37C	SC_37C	GTTGAACTGGTTGTT	-0.00983619	0.0114865	10	5.9503e-09	3.25029e-07	-0.0331275	0.0232913	-0.0505646	0.00237627	5	0.0162121	0.00190037	5
G5150_P1C04-SC_37C	G5150_P1C04	5150	P1C04	P1_SC_37C	SC_37C	GTTGGGCGCTTAAAG	0.00172351	0.00129832	10	0.221574	0.293115	-0.00339134	0.00511485	-0.00158786	0.00175356	5	0.00301959	0.00109707	5
G5150_P1C04-SC_37C	G5150_P1C04	5150	P1C04	P1_SC_37C	SC_37C	GTTTAGCTTCCGTTG	0.0038815	0.00296102	10	0.0297143	0.053951	0.000432998	0.0034485	0.0060429	0.00143898	5	-0.006366	0.00313325	5
G5150_P1C04-SC_37C	G5150_P1C04	5150	P1C04	P1_SC_37C	SC_37C	GTTTGTTTTGGGAAA	-0.163793	0.0191183	6	0.00425899	0.0105623	-0.140287	-0.0235052	-0.121509	0.0260054	3	-0.175543	0.0137092	3
G5150_P1C04-SC_37C	G5150_P1C04	5150	P1C04	P1_SC_37C	SC_37C	TAACCTCGCGCTGAG	-0.0389768	0.0108087	10	0.672282	0.735261	0.0247705	-0.0637472	-0.00410596	0.0112819	5	-0.0524258	0.00700645	5
G5150_P1C04-SC_37C	G5150_P1C04	5150	P1C04	P1_SC_37C	SC_37C	TAATATTGTTTTGCG	-0.171414	0.0516493	7	0.0748435	0.117807	-0.0703753	-0.101038	-0.0284055	0.0139159	5	-0.225099	0.00852629	2
G5150_P1C04-SC_37C	G5150_P1C04	5150	P1C04	P1_SC_37C	SC_37C	TAGACGGACATCTTC	0.0022465	0.00554814	7	0.281001	0.357515	0.0214085	-0.019162	0.00736611	0.00538575	4	-0.00972631	0.00823618	3
G5150_P1C04-SC_37C	G5150_P1C04	5150	P1C04	P1_SC_37C	SC_37C	TATATTGAACTTTAC	-0.00270736	0.00205424	10	0.112027	0.165052	0.0115448	-0.0142522	0.00247331	0.00161444	5	-0.00795601	0.001625	5
G5150_P1C04-SC_37C	G5150_P1C04	5150	P1C04	P1_SC_37C	SC_37C	TATGCCCTTCTTCTG	-0.0270465	0.006165	10	0.0530032	0.0877424	0.00616433	-0.0332109	-0.0190315	0.00867697	5	-0.0341651	0.00817729	5
G5150_P1C04-SC_37C	G5150_P1C04	5150	P1C04	P1_SC_37C	SC_37C	TCAAAACGGAGTGTT	-0.000598985	0.00117032	10	0.115043	0.168817	-0.00120033	0.000601342	-0.00233123	0.00168892	5	0.000636098	0.00142611	5
G5150_P1C04-SC_37C	G5150_P1C04	5150	P1C04	P1_SC_37C	SC_37C	TCAAAGCATGAAAAA	-0.0280958	0.00360121	10	2.76428e-09	2.04968e-07	-0.086374	0.0582782	-0.0403037	0.00183222	5	-0.0202377	0.00147001	5
G5150_P1C04-SC_37C	G5150_P1C04	5150	P1C04	P1_SC_37C	SC_37C	TCAAATGATGAGGAT	-0.0264154	0.00889576	10	0.0608249	0.098607	0.0191963	-0.0456117	-0.0130644	0.00470161	5	-0.057282	0.00714882	5
G5150_P1C04-SC_37C	G5150_P1C04	5150	P1C04	P1_SC_37C	SC_37C	TCAACAACCTATGCA	0.00549099	0.00118589	10	0.00709349	0.0162852	0.0238632	-0.0183723	0.00553896	0.00109089	5	0.00529015	0.00223207	5
G5150_P1C04-SC_37C	G5150_P1C04	5150	P1C04	P1_SC_37C	SC_37C	TCATAGGTATCTCGC	0.000532795	0.00104983	10	0.543005	0.618358	-0.00351693	0.00404973	-0.00069719	0.00129457	5	0.00210488	0.00146357	5
G5150_P1C04-SC_37C	G5150_P1C04	5150	P1C04	P1_SC_37C	SC_37C	TCGAAAGCACAGTAG	-0.14251	0.0202256	5	0.0117025	0.0249279	-0.135006	-0.00750371	-0.175145	0.0514436	2	-0.140967	0.0111865	3
G5150_P1C04-SC_37C	G5150_P1C04	5150	P1C04	P1_SC_37C	SC_37C	TCGATAGAATTTACT	-0.0510973	0.00796519	10	0.0065342	0.0152086	-0.0242833	-0.026814	-0.0414962	0.0142694	5	-0.0537799	0.00754275	5
G5150_P1C04-SC_37C	G5150_P1C04	5150	P1C04	P1_SC_37C	SC_37C	TCTTGGAGGTGAATG	-0.0864566	0.00560967	10	2.09585e-06	2.20507e-05	-0.0830805	-0.00337606	-0.0746058	0.006427	5	-0.0970576	0.00607868	5
G5150_P1C04-SC_37C	G5150_P1C04	5150	P1C04	P1_SC_37C	SC_37C	TGATCATCACGGGAC	-0.00358508	0.0164885	10	0.83298	0.870011	-0.0208832	0.0172981	-0.00199388	0.00201016	5	-0.0685077	0.01284	5
G5150_P1C04-SC_37C	G5150_P1C04	5150	P1C04	P1_SC_37C	SC_37C	TGGAGTCTTTGTTGA	-0.045176	0.00491204	10	1.01514e-08	4.71005e-07	-0.063193	0.018017	-0.0608496	0.00288837	5	-0.0337576	0.00246531	5
G5150_P1C04-SC_37C	G5150_P1C04	5150	P1C04	P1_SC_37C	SC_37C	TTAATTAGAGGTATG	-0.00961704	0.00445058	9	0.000852627	0.00278698	-0.0312409	0.0216239	-0.0210983	0.00384571	4	8.38439e-05	0.00353497	5
G5150_P1C04-SC_37C	G5150_P1C04	5150	P1C04	P1_SC_37C	SC_37C	TTAATTGCACTTATG	-0.0350612	0.0092132	4	0.0694564	0.1105	-0.072662	0.0376008	-0.0398654	0.0111167	3	-0.0206767	0.0192361	1
G5150_P1C04-SC_37C	G5150_P1C04	5150	P1C04	P1_SC_37C	SC_37C	TTAGTCTTTCCATCA	-0.196156	0.0167256	10	1.30213e-06	1.51736e-05	-0.204752	0.00859578	-0.181494	0.00910287	5	-0.252796	0.017891	5
G5150_P1C04-SC_37C	G5150_P1C04	5150	P1C04	P1_SC_37C	SC_37C	TTATATTTATTTGCT	-0.0030207	0.00137679	10	0.00665378	0.0154149	-0.0146704	0.0116497	-0.00446901	0.00111681	5	0.000680683	0.00178538	5
G5150_P1C04-SC_37C	G5150_P1C04	5150	P1C04	P1_SC_37C	SC_37C	TTTAACTCACCGTAA	-0.00751783	0.00485769	9	0.0614515	0.0994157	-0.0171085	0.00959069	-0.0126193	0.00401575	4	0.00405015	0.00604711	5
G5150_P1C04-SC_37C	G5150_P1C04	5150	P1C04	P1_SC_37C	SC_37C	TTTATAAATCAATAG	0.00132965	0.000992456	10	0.394361	0.474139	0.00352976	-0.00220011	0.000907549	0.000810656	5	0.00311849	0.00166884	5
G5150_P1C04-SC_37C	G5150_P1C04	5150	P1C04	P1_SC_37C	SC_37C	TTTTGCATTTAGGCG	-0.100558	0.00972917	10	3.18258e-10	4.89577e-08	-0.0117231	-0.0888352	-0.136238	0.00437388	5	-0.0827947	0.00308616	5
G5150_P1C04-SC_37C	G5150_P1C04	5150	P1C04	P1_SC_37C	SC_37C	CATCAATGAGGCAGT	-0.183889	0.0147137	5	0.000233911	0.00095192	-0.170366	-0.0135232				-0.183889	0.0147137	5
G5150_P1C04-SC_37C	G5150_P1C04	5150	P1C04	P1_SC_37C	SC_37C	TACACCAATTACACT	-0.145684	0.024853	4	0.00988045	0.0216844						-0.145684	0.024853	4
G5150_P1B04-SC_37C	G5150_P1B04	5150	P1B04	P1_SC_37C	SC_37C	AAAACATTATCAAAG	-1.92773e-05	0.00680645	8	0.359281	0.438308	-0.000652642	0.000633365	-0.0097576	0.0115402	3	0.00531689	0.00854253	5
G5150_P1B04-SC_37C	G5150_P1B04	5150	P1B04	P1_SC_37C	SC_37C	AAAAGAAAAATGTAT	0.00397218	0.00601387	10	0.557371	0.63137	0.0418506	-0.0378784	0.00476882	0.00448029	5	-0.00127667	0.0115003	5
G5150_P1B04-SC_37C	G5150_P1B04	5150	P1B04	P1_SC_37C	SC_37C	AAAAGCGACATTTCT	-0.0390138	0.00917739	9	0.00210594	0.00586097	-0.0616103	0.0225965	-0.0194499	0.00514125	4	-0.0655168	0.00598395	5
G5150_P1B04-SC_37C	G5150_P1B04	5150	P1B04	P1_SC_37C	SC_37C	ACAACCTACCTGCTA	-0.0232591	0.00795916	10	0.876074	0.903789	-0.00161883	-0.0216403	0.00103899	0.00914442	5	-0.0321644	0.00553596	5
G5150_P1B04-SC_37C	G5150_P1B04	5150	P1B04	P1_SC_37C	SC_37C	ACAAGTTTTACAGTT	0.0152756	0.00511009	10	0.0894971	0.137012	0.021037	-0.00576133	0.00667952	0.00470023	5	0.0280435	0.00572832	5
G5150_P1B04-SC_37C	G5150_P1B04	5150	P1B04	P1_SC_37C	SC_37C	ACAGGGCAGCTCCCG	-0.00821094	0.0223782	7	0.979713	0.984296	-0.0292694	0.0210585	-0.000985588	0.035609	3	-0.0144414	0.0330666	4
G5150_P1B04-SC_37C	G5150_P1B04	5150	P1B04	P1_SC_37C	SC_37C	ACAGTTGACGGACAG	0.0258553	0.0108666	10	0.06511	0.104385	0.00149213	0.0243632	0.0273559	0.0044271	5	-0.000115401	0.0184178	5
G5150_P1B04-SC_37C	G5150_P1B04	5150	P1B04	P1_SC_37C	SC_37C	ACCACCGGTCCTGCC	-0.0148697	0.0141264	6	0.399131	0.478903	-0.00133408	-0.0135356	-0.0201573	0.0194348	3	-0.00692728	0.0238192	3
G5150_P1B04-SC_37C	G5150_P1B04	5150	P1B04	P1_SC_37C	SC_37C	AGAACATCATCTACA	-0.111993	0.0386543	9	0.127352	0.183869			-0.0963825	0.0309853	4	-0.173785	0.061646	5
G5150_P1B04-SC_37C	G5150_P1B04	5150	P1B04	P1_SC_37C	SC_37C	AGAAGACGACGATGA	-0.0763306	0.00958965	10	0.000115278	0.000535826	-0.0269064	-0.0494242	-0.0878016	0.0133472	5	-0.0654102	0.0130229	5
G5150_P1B04-SC_37C	G5150_P1B04	5150	P1B04	P1_SC_37C	SC_37C	AGATTCATCCCATGG	0.027314	0.0128179	8	0.0227416	0.0432375	-0.00105522	0.0283692	0.0344254	0.00516236	3	-0.00822829	0.011541	5
G5150_P1B04-SC_37C	G5150_P1B04	5150	P1B04	P1_SC_37C	SC_37C	AGTGTATGATAATAT	0.0251738	0.00285481	10	1.09729e-08	4.86437e-07	-0.01028	0.0354538	0.0250253	0.00278581	5	0.0256614	0.00504718	5
G5150_P1B04-SC_37C	G5150_P1B04	5150	P1B04	P1_SC_37C	SC_37C	AGTGTTAATCAGACC	-0.0112002	0.0262194	9	0.828043	0.866027	-0.0454435	0.0342433	-0.00941818	0.0291012	4	-0.0153296	0.0442992	5
G5150_P1B04-SC_37C	G5150_P1B04	5150	P1B04	P1_SC_37C	SC_37C	AGTTTATAAAAAATT	0.0531064	0.00709588	9	0.000437006	0.00160489	0.0647237	-0.0116173	0.0313414	0.00780401	4	0.0627968	0.00520725	5
G5150_P1B04-SC_37C	G5150_P1B04	5150	P1B04	P1_SC_37C	SC_37C	ATAATTTTCATCCAC	-0.00570082	0.0200302	5	0.886514	0.912218	-0.0111715	0.00547066	-0.00794686	0.0512727	1	-0.00512055	0.0260613	4
G5150_P1B04-SC_37C	G5150_P1B04	5150	P1B04	P1_SC_37C	SC_37C	ATAGAGCGGCGTTGA	-0.0461178	0.0158177	8	0.152979	0.21477	-0.011058	-0.0350597	-0.0394293	0.0117755	3	-0.0705821	0.0225207	5
G5150_P1B04-SC_37C	G5150_P1B04	5150	P1B04	P1_SC_37C	SC_37C	ATATTGAGTAAGTAC	0.000870061	0.0106991	9	0.717075	0.773606	0.00108997	-0.000219906	-0.00549855	0.0169923	5	0.00470302	0.0131824	4
G5150_P1B04-SC_37C	G5150_P1B04	5150	P1B04	P1_SC_37C	SC_37C	ATCGTTGGCATTTGG	-0.252251	0.063271	7	0.0122096	0.0257875	-0.105906	-0.146345	-0.263531	0.0203939	3	-0.0969049	0.0756835	4
G5150_P1B04-SC_37C	G5150_P1B04	5150	P1B04	P1_SC_37C	SC_37C	ATGAAGTTCATAATG	0.0373976	0.0246454	3	0.0707081	0.112262	0.0266474	0.0107503	0.0602033	0.00723194	2	-0.0122833	0.010674	1
G5150_P1B04-SC_37C	G5150_P1B04	5150	P1B04	P1_SC_37C	SC_37C	ATGGCGATGGTCTTG	-0.00501642	0.011739	7	0.325111	0.403458	-0.00278687	-0.00222955	-0.0194028	0.0223339	3	-1.30919e-05	0.013171	4
G5150_P1B04-SC_37C	G5150_P1B04	5150	P1B04	P1_SC_37C	SC_37C	CAAGGATCCCCGTAG	-0.0436331	0.0193059	7	0.214163	0.284994	-0.0256483	-0.0179848	-0.0452123	0.0166451	3	-0.0370689	0.033936	4
G5150_P1B04-SC_37C	G5150_P1B04	5150	P1B04	P1_SC_37C	SC_37C	CAAGTTCGGCGAAAT	0.017346	0.0187337	8	0.266796	0.342273	-0.00314285	0.0204888	0.0204941	0.00402193	3	-0.0358529	0.0165334	5
G5150_P1B04-SC_37C	G5150_P1B04	5150	P1B04	P1_SC_37C	SC_37C	CAATCTTGAATTGAT	0.016067	0.00968004	7	0.0321829	0.0576588	0.0141933	0.00187369	0.0269438	0.00553045	2	-0.00646929	0.00796069	5
G5150_P1B04-SC_37C	G5150_P1B04	5150	P1B04	P1_SC_37C	SC_37C	CAATTTCAACGTTGT	-0.169343	0.0324553	5	0.0133469	0.0276988	-0.0641989	-0.105144	-0.214164	0.0498691	3	-0.168837	0.00529852	2
G5150_P1B04-SC_37C	G5150_P1B04	5150	P1B04	P1_SC_37C	SC_37C	CATATGCATTCCTTG	-0.0228514	0.0056859	9	0.00346412	0.00887472	-0.00930645	-0.013545	-0.0312204	0.0104327	4	-0.0200995	0.00598246	5
G5150_P1B04-SC_37C	G5150_P1B04	5150	P1B04	P1_SC_37C	SC_37C	CATCAATGAGGCAGT	-0.151048	0.0353112	7	0.0236206	0.0445956	-0.170366	0.0193182	-0.141772	0.0169066	3	-0.226223	0.0481302	4
G5150_P1B04-SC_37C	G5150_P1B04	5150	P1B04	P1_SC_37C	SC_37C	CCAACACAGGCTTCG	-0.00365081	0.00649164	8	0.193567	0.26144	0.00488293	-0.00853374	-0.0137539	0.0136043	3	-0.000928844	0.00706141	5
G5150_P1B04-SC_37C	G5150_P1B04	5150	P1B04	P1_SC_37C	SC_37C	CCAAGACCGTGTAAA	-0.152824	0.024242	7	0.0310788	0.0560274	-0.232802	0.0799781	-0.141981	0.0270668	2	-0.168989	0.0330488	5
G5150_P1B04-SC_37C	G5150_P1B04	5150	P1B04	P1_SC_37C	SC_37C	CCAGGATGTACCGCC	-0.0824299	0.00817183	4	0.00453777	0.0111471	-0.104767	0.0223366	-0.0805425	0.00299638	2	-0.0995183	0.00901604	2
G5150_P1B04-SC_37C	G5150_P1B04	5150	P1B04	P1_SC_37C	SC_37C	CCGTTAGTATCGCTA	-0.0227056	0.00696243	7	0.108021	0.160154	-0.019524	-0.00318162	-0.0206325	0.00950539	3	-0.0254927	0.0110216	4
G5150_P1B04-SC_37C	G5150_P1B04	5150	P1B04	P1_SC_37C	SC_37C	CGAACAGAAACACAA	-0.145905	0.0296771	9	0.0154758	0.0313978	-0.0509589	-0.0949462	-0.132238	0.0235009	4	-0.198283	0.046007	5
G5150_P1B04-SC_37C	G5150_P1B04	5150	P1B04	P1_SC_37C	SC_37C	CGAATGCCATACAAA	0.0251925	0.0180748	7	0.028155	0.0515851	-0.0187919	0.0439845	0.043266	0.00683654	2	-0.0211668	0.0109493	5
G5150_P1B04-SC_37C	G5150_P1B04	5150	P1B04	P1_SC_37C	SC_37C	CGATGATGATGATGA	0.0006473	0.00949739	9	0.4578	0.536837	-0.00559316	0.00624046	0.00601204	0.00529231	5	-0.0299775	0.0126447	4
G5150_P1B04-SC_37C	G5150_P1B04	5150	P1B04	P1_SC_37C	SC_37C	CGCGATCAATCCTCT	0.0194963	0.0223708	8	0.483554	0.561225	-0.0319146	0.051411	0.0209083	0.00444369	3	-0.0324132	0.0269435	5
G5150_P1B04-SC_37C	G5150_P1B04	5150	P1B04	P1_SC_37C	SC_37C	CTAAGCAGTCTTCTC	-0.0779855	0.0066328	10	1.72516e-05	0.000116732	-0.133331	0.0553451	-0.0805794	0.00839598	5	-0.0736533	0.0108504	5
G5150_P1B04-SC_37C	G5150_P1B04	5150	P1B04	P1_SC_37C	SC_37C	CTAAGTGTGAAGGAG	-0.0146901	0.0245245	3	0.988494	0.991089	-0.131283	0.116593	0.00102081	0.0565396	1	-0.0226447	0.0402309	2
G5150_P1B04-SC_37C	G5150_P1B04	5150	P1B04	P1_SC_37C	SC_37C	CTACTTACAACGGAA	-0.0569054	0.0147036	9	0.000491019	0.00176781	2.16745e-05	-0.0569271	-0.0976364	0.0198506	4	-0.041367	0.0122607	5
G5150_P1B04-SC_37C	G5150_P1B04	5150	P1B04	P1_SC_37C	SC_37C	CTAGTTGTATAGCCA	-0.0837472	0.0408804	5	0.972353	0.978164	-0.0228617	-0.0608855	-0.00344649	0.0916496	1	-0.104032	0.0460639	4
G5150_P1B04-SC_37C	G5150_P1B04	5150	P1B04	P1_SC_37C	SC_37C	CTATCAAGGCTTAAT	0.0212514	0.0115282	7	0.345326	0.424191	0.0109081	0.0103433	-0.0162584	0.0324695	2	0.0227062	0.00639464	5
G5150_P1B04-SC_37C	G5150_P1B04	5150	P1B04	P1_SC_37C	SC_37C	CTCGCTAATACTCCT	-0.0454628	0.00644053	10	0.000652138	0.00224101	-0.0375804	-0.00788246	-0.0469541	0.0114671	5	-0.0448827	0.00715213	5
G5150_P1B04-SC_37C	G5150_P1B04	5150	P1B04	P1_SC_37C	SC_37C	CTCTTGAGAATACTT	-0.0530756	0.0199837	9	0.000912202	0.00294005	-0.0948968	0.0418212	-0.114537	0.0278412	4	-0.0394795	0.0130946	5
G5150_P1B04-SC_37C	G5150_P1B04	5150	P1B04	P1_SC_37C	SC_37C	CTGATTTGTGCTGTC	-0.0419924	0.0396146	4	0.689226	0.750481	0.0375917	-0.0795841	-0.0296767	0.0483168	2	-0.0733007	0.0770367	2
G5150_P1B04-SC_37C	G5150_P1B04	5150	P1B04	P1_SC_37C	SC_37C	CTTGATCAATCAAAA	-0.243625	0.0232859	7	0.000806925	0.00265711	-0.0824445	-0.16118	-0.236843	0.0298484	4	-0.257837	0.0432075	3
G5150_P1B04-SC_37C	G5150_P1B04	5150	P1B04	P1_SC_37C	SC_37C	CTTGCAAGTGTAATT	-0.0327408	0.00496334	8	0.000339387	0.00129964	0.000560442	-0.0333012	-0.0231461	0.00510414	4	-0.0419839	0.00500975	4
G5150_P1B04-SC_37C	G5150_P1B04	5150	P1B04	P1_SC_37C	SC_37C	CTTTCTTGTGTATTT	-0.0941403	0.0220593	8	0.0313879	0.0564619	-0.0498822	-0.0442581	-0.10682	0.050547	3	-0.0912896	0.0239671	5
G5150_P1B04-SC_37C	G5150_P1B04	5150	P1B04	P1_SC_37C	SC_37C	GAACTCAGGTTCCAT	0.00968116	0.0103557	7	0.576164	0.648412	-0.0442945	0.0539756	0.0111436	0.00491874	2	-0.00216348	0.0139984	5
G5150_P1B04-SC_37C	G5150_P1B04	5150	P1B04	P1_SC_37C	SC_37C	GAGAATGAAGGACAG	-0.0895219	0.0107244	10	7.5775e-07	1.01498e-05	0.00446468	-0.0939865	-0.121624	0.0111201	5	-0.0729175	0.00799747	5
G5150_P1B04-SC_37C	G5150_P1B04	5150	P1B04	P1_SC_37C	SC_37C	GAGTGCTTCAAAGTT	0.018743	0.00560811	9	0.00041524	0.00153536	0.0186933	4.96179e-05	0.0285089	0.00554024	4	0.0064579	0.00621383	5
G5150_P1B04-SC_37C	G5150_P1B04	5150	P1B04	P1_SC_37C	SC_37C	GCAAGAAAGAAACCC	-0.111404	0.0147644	3	0.187899	0.255183	-0.0257965	-0.085608	-0.115596	0.0352475	1	-0.10924	0.025325	2
G5150_P1B04-SC_37C	G5150_P1B04	5150	P1B04	P1_SC_37C	SC_37C	GCCCTCGAAACCTAT	-0.135683	0.0396809	5	0.100017	0.150073	-0.0598668	-0.0758164	-0.138717	0.0596698	3	-0.131421	0.0707206	2
G5150_P1B04-SC_37C	G5150_P1B04	5150	P1B04	P1_SC_37C	SC_37C	GCTAATTTCAAGAAT	-0.107052	0.0404263	4	0.993552	0.995037	-0.0633115	-0.0437403	-0.000413842	0.0454604	1	-0.1437	0.0266505	3
G5150_P1B04-SC_37C	G5150_P1B04	5150	P1B04	P1_SC_37C	SC_37C	GCTGCTTATGAGGAT	0.00145304	0.00573447	10	0.0552037	0.0907579	-0.0056472	0.00710024	-0.010058	0.00582033	5	0.0141427	0.00611105	5
G5150_P1B04-SC_37C	G5150_P1B04	5150	P1B04	P1_SC_37C	SC_37C	GGTGGAAGTAGCAGT	0.0244099	0.0254474	6	0.219231	0.290528	0.00243518	0.0219747	-0.0480157	0.0658451	2	0.0248759	0.00528157	4
G5150_P1B04-SC_37C	G5150_P1B04	5150	P1B04	P1_SC_37C	SC_37C	GGTTGCCCAGAAGTA	-0.0653546	0.00865029	6	0.00790964	0.0179016	-0.0194968	-0.0458577	-0.0627343	0.0119079	3	-0.0693073	0.0146254	3
G5150_P1B04-SC_37C	G5150_P1B04	5150	P1B04	P1_SC_37C	SC_37C	GTAATCTGACTCTAG	-0.0197234	0.0139303	10	0.835806	0.872215	0.0077402	-0.0274636	0.00263925	0.0109142	5	-0.0602209	0.0146873	5
G5150_P1B04-SC_37C	G5150_P1B04	5150	P1B04	P1_SC_37C	SC_37C	GTACAAGAAATTTTG	-0.0282528	0.0155358	6	0.215826	0.286687	-0.0434344	0.0151816	-0.0302658	0.00807031	3	-0.00306017	0.0285503	3
G5150_P1B04-SC_37C	G5150_P1B04	5150	P1B04	P1_SC_37C	SC_37C	GTCACCGGCACTAAC	-0.0172178	0.0306825	7	0.804222	0.846346	-0.0259069	0.00868916	0.0127803	0.0257978	2	-0.0692017	0.0339603	5
G5150_P1B04-SC_37C	G5150_P1B04	5150	P1B04	P1_SC_37C	SC_37C	GTGTGATTACTAAAT	-0.038175	0.0140058	9	0.250583	0.324988	-0.0108598	-0.0273153	-0.0270301	0.0283329	4	-0.0409295	0.0140856	5
G5150_P1B04-SC_37C	G5150_P1B04	5150	P1B04	P1_SC_37C	SC_37C	GTTAAATCAACAGTT	-0.00207455	0.00447141	10	0.0642876	0.103306	-0.0412742	0.0391996	-0.00904977	0.00607796	5	0.00352452	0.00544548	5
G5150_P1B04-SC_37C	G5150_P1B04	5150	P1B04	P1_SC_37C	SC_37C	GTTCAGCTTTGATCG	-0.275629	0.017344	10	5.00162e-06	4.38152e-05	-0.124119	-0.15151	-0.274213	0.0148652	5	-0.282778	0.0334071	5
G5150_P1B04-SC_37C	G5150_P1B04	5150	P1B04	P1_SC_37C	SC_37C	GTTGAACTGGTTGTT	-0.00214936	0.00664387	9	0.000157205	0.00068974	-0.0331275	0.0309782	-0.0106755	0.00316369	4	0.0191968	0.00500584	5
G5150_P1B04-SC_37C	G5150_P1B04	5150	P1B04	P1_SC_37C	SC_37C	GTTGGGCGCTTAAAG	0.00643428	0.00572171	10	0.482033	0.559929	-0.00339134	0.00982562	-0.00442818	0.00798163	5	0.0131586	0.00627989	5
G5150_P1B04-SC_37C	G5150_P1B04	5150	P1B04	P1_SC_37C	SC_37C	GTTTAGCTTCCGTTG	-0.0353166	0.0159359	9	0.933426	0.949951	0.000432998	-0.0357496	0.00180553	0.0305368	4	-0.0383965	0.00879581	5
G5150_P1B04-SC_37C	G5150_P1B04	5150	P1B04	P1_SC_37C	SC_37C	GTTTGTTTTGGGAAA	-0.231915	0.0391543	3	0.0639892	0.102928	-0.140287	-0.0916281	-0.304842	0.0308617	1	-0.193909	0.0222797	2
G5150_P1B04-SC_37C	G5150_P1B04	5150	P1B04	P1_SC_37C	SC_37C	TAACCTCGCGCTGAG	-0.0462577	0.0118234	10	0.00244734	0.00662893	0.0247705	-0.0710282	-0.0667308	0.0187508	5	-0.0375122	0.0122552	5
G5150_P1B04-SC_37C	G5150_P1B04	5150	P1B04	P1_SC_37C	SC_37C	TAATATTGTTTTGCG	-0.101973	0.0626931	4	0.961979	0.970549	-0.0703753	-0.0315973	-0.00712402	0.132421	1	-0.133704	0.0765931	3
G5150_P1B04-SC_37C	G5150_P1B04	5150	P1B04	P1_SC_37C	SC_37C	TACACCAATTACACT	-0.0795827	0.0268464	3	0.231235	0.303658			-0.056038	0.0214681	2	-0.127149	0.0305138	1
G5150_P1B04-SC_37C	G5150_P1B04	5150	P1B04	P1_SC_37C	SC_37C	TAGACGGACATCTTC	0.0106333	0.0135919	6	0.535	0.610638	0.0214085	-0.0107752	0.015865	0.0114078	2	-0.00417581	0.0191932	4
G5150_P1B04-SC_37C	G5150_P1B04	5150	P1B04	P1_SC_37C	SC_37C	TATATTGAACTTTAC	0.00477032	0.00455164	10	0.389596	0.469452	0.0115448	-0.00677453	0.0049331	0.00520013	5	0.00439246	0.00792275	5
G5150_P1B04-SC_37C	G5150_P1B04	5150	P1B04	P1_SC_37C	SC_37C	TATGCCCTTCTTCTG	-0.0738763	0.0178508	10	0.000465599	0.00169046	0.00616433	-0.0800406	-0.119147	0.0285862	5	-0.0686573	0.00970598	5
G5150_P1B04-SC_37C	G5150_P1B04	5150	P1B04	P1_SC_37C	SC_37C	TCAAAACGGAGTGTT	0.00565825	0.0046917	10	0.764261	0.812488	-0.00120033	0.00685857	-0.00132633	0.0056126	5	0.0136466	0.00600236	5
G5150_P1B04-SC_37C	G5150_P1B04	5150	P1B04	P1_SC_37C	SC_37C	TCAAAGCATGAAAAA	-0.023384	0.00749209	9	0.0017673	0.00507029	-0.086374	0.0629901	-0.0150954	0.00342544	4	-0.0476752	0.00586411	5
G5150_P1B04-SC_37C	G5150_P1B04	5150	P1B04	P1_SC_37C	SC_37C	TCAAATGATGAGGAT	0.0110437	0.00393904	10	0.0308134	0.0556373	0.0191963	-0.00815262	0.011017	0.00474251	5	0.0110958	0.00662985	5
G5150_P1B04-SC_37C	G5150_P1B04	5150	P1B04	P1_SC_37C	SC_37C	TCAACAACCTATGCA	-0.0171042	0.00782167	9	0.00379757	0.00959559	0.0238632	-0.0409675	-0.0339112	0.0102691	5	-0.00980117	0.00676923	4
G5150_P1B04-SC_37C	G5150_P1B04	5150	P1B04	P1_SC_37C	SC_37C	TCATAGGTATCTCGC	0.00135362	0.00560025	10	0.507938	0.585165	-0.00351693	0.00487055	-0.00285943	0.003635	5	0.0178796	0.00719929	5
G5150_P1B04-SC_37C	G5150_P1B04	5150	P1B04	P1_SC_37C	SC_37C	TCGAAAGCACAGTAG	-0.165272	0.0302625	7	0.0125211	0.0263382	-0.135006	-0.0302657	-0.16625	0.0356816	4	-0.162318	0.062001	3
G5150_P1B04-SC_37C	G5150_P1B04	5150	P1B04	P1_SC_37C	SC_37C	TCGATAGAATTTACT	-0.22249	0.0282618	9	0.000177053	0.000758704	-0.0242833	-0.198206	-0.232259	0.0185477	5	-0.151625	0.0499531	4
G5150_P1B04-SC_37C	G5150_P1B04	5150	P1B04	P1_SC_37C	SC_37C	TCTTGGAGGTGAATG	-0.336196	0.0512065	4	0.00879088	0.0196321	-0.0830805	-0.253116	-0.214313	0.028723	2	-0.339784	0.00492782	2
G5150_P1B04-SC_37C	G5150_P1B04	5150	P1B04	P1_SC_37C	SC_37C	TGATCATCACGGGAC	-0.102211	0.0224509	8	0.00659229	0.0153184	-0.0208832	-0.0813276	-0.110263	0.0207804	5	-0.0596584	0.0477721	3
G5150_P1B04-SC_37C	G5150_P1B04	5150	P1B04	P1_SC_37C	SC_37C	TGGAGTCTTTGTTGA	0.0376876	0.00452725	10	5.50658e-09	3.07603e-07	-0.063193	0.100881	0.0319324	0.00317906	5	0.0513282	0.00489423	5
G5150_P1B04-SC_37C	G5150_P1B04	5150	P1B04	P1_SC_37C	SC_37C	TTAATTAGAGGTATG	-0.0246196	0.00919736	8	0.524447	0.601062	-0.0312409	0.00662133	-0.00899969	0.0146847	3	-0.0333795	0.0109971	5
G5150_P1B04-SC_37C	G5150_P1B04	5150	P1B04	P1_SC_37C	SC_37C	TTAATTGCACTTATG	-0.0265048	0.0114789	7	0.162661	0.22597	-0.072662	0.0461572	-0.0258836	0.00751851	4	-0.034846	0.0275502	3
G5150_P1B04-SC_37C	G5150_P1B04	5150	P1B04	P1_SC_37C	SC_37C	TTAGTCTTTCCATCA	-0.268468	0.0210138	9	1.66102e-05	0.000113129	-0.204752	-0.0637157	-0.228138	0.023344	5	-0.307961	0.0231004	4
G5150_P1B04-SC_37C	G5150_P1B04	5150	P1B04	P1_SC_37C	SC_37C	TTATATTTATTTGCT	-0.0039693	0.00695115	8	0.887482	0.912987	-0.0146704	0.0107011	0.00103892	0.00446724	3	-0.0201639	0.00803309	5
G5150_P1B04-SC_37C	G5150_P1B04	5150	P1B04	P1_SC_37C	SC_37C	TTTAACTCACCGTAA	-0.00342262	0.0201937	7	0.822834	0.861638	-0.0171085	0.0136859	0.00941766	0.0299885	2	-0.0138617	0.0270396	5
G5150_P1B04-SC_37C	G5150_P1B04	5150	P1B04	P1_SC_37C	SC_37C	TTTATAAATCAATAG	0.00384568	0.00468454	10	0.3104	0.38824	0.00352976	0.000315915	0.00500741	0.00287177	5	-0.00538186	0.00809356	5
G5150_P1B04-SC_37C	G5150_P1B04	5150	P1B04	P1_SC_37C	SC_37C	TTTTGCATTTAGGCG	-0.0550747	0.00660011	10	4.82491e-05	0.000265477	-0.0117231	-0.0433516	-0.0628938	0.0086286	5	-0.0462918	0.00914493	5
G5150_P1B04-SC_37C	G5150_P1B04	5150	P1B04	P1_SC_37C	SC_37C	ATAGTCGATTAAGAT	-0.079718	0.0346041	3	0.145447	0.205843	-0.0514128	-0.0283051				-0.079718	0.0346041	3
G5150_P1B04-SC_37C	G5150_P1B04	5150	P1B04	P1_SC_37C	SC_37C	ATTATCAAGTGCCAG	-0.128958	0.0544534	3	0.140528	0.199927	-0.0673298	-0.0616278				-0.128958	0.0544534	3
G5150_P3G06-SC_37C	G5150_P3G06	5150	P3G06	P3_SC_37C	SC_37C	AAAACATTATCAAAG	-0.00385788	0.00281375	5	0.226293	0.298237	-0.00194739	-0.00191049	-0.00385788	0.00281375	5
G5150_P3G06-SC_37C	G5150_P3G06	5150	P3G06	P3_SC_37C	SC_37C	AAAAGAAAAATGTAT	0.000282909	0.000843022	5	0.386966	0.466735	0.0167521	-0.0164692	0.000282909	0.000843022	5
G5150_P3G06-SC_37C	G5150_P3G06	5150	P3G06	P3_SC_37C	SC_37C	AAAAGCGACATTTCT	-0.0168336	0.00326822	4	0.0130522	0.0272376	-0.0396226	0.022789	-0.0168336	0.00326822	4
G5150_P3G06-SC_37C	G5150_P3G06	5150	P3G06	P3_SC_37C	SC_37C	AATGATACCATTTTT	-0.0427006	0.00193942	5	1.75439e-05	0.000118196			-0.0427006	0.00193942	5
G5150_P3G06-SC_37C	G5150_P3G06	5150	P3G06	P3_SC_37C	SC_37C	ACAACCTACCTGCTA	-0.00122464	0.00230816	5	0.602401	0.672798	-0.00239255	0.00116791	-0.00122464	0.00230816	5
G5150_P3G06-SC_37C	G5150_P3G06	5150	P3G06	P3_SC_37C	SC_37C	ACAAGTTTTACAGTT	-0.0266046	0.00208175	5	0.000159075	0.000695298	-0.0260819	-0.000522684	-0.0266046	0.00208175	5
G5150_P3G06-SC_37C	G5150_P3G06	5150	P3G06	P3_SC_37C	SC_37C	ACAGGGCAGCTCCCG	-0.0151721	0.00291758	3	0.0325952	0.0582886	-0.0397814	0.0246093	-0.0151721	0.00291758	3
G5150_P3G06-SC_37C	G5150_P3G06	5150	P3G06	P3_SC_37C	SC_37C	ACAGTTGACGGACAG	0.000173694	0.0010196	5	0.800541	0.843684	-0.00517114	0.00534484	0.000173694	0.0010196	5
G5150_P3G06-SC_37C	G5150_P3G06	5150	P3G06	P3_SC_37C	SC_37C	ACCACCGGTCCTGCC	-0.0257466	0.0110574	4	0.101735	0.15223	-0.000431459	-0.0253152	-0.0257466	0.0110574	4
G5150_P3G06-SC_37C	G5150_P3G06	5150	P3G06	P3_SC_37C	SC_37C	AGAACATCATCTACA	-0.109226	0.0101399	4	0.00169587	0.00490378	-0.223556	0.11433	-0.109226	0.0101399	4
G5150_P3G06-SC_37C	G5150_P3G06	5150	P3G06	P3_SC_37C	SC_37C	AGAAGACGACGATGA	-0.0750628	0.00276831	5	9.2839e-06	7.19204e-05	-0.0663318	-0.00873107	-0.0750628	0.00276831	5
G5150_P3G06-SC_37C	G5150_P3G06	5150	P3G06	P3_SC_37C	SC_37C	AGATTCATCCCATGG	0.00203374	0.00502249	4	0.709298	0.767057	0.0346566	-0.0326228	0.00203374	0.00502249	4
G5150_P3G06-SC_37C	G5150_P3G06	5150	P3G06	P3_SC_37C	SC_37C	AGTGTATGATAATAT	-0.0216402	0.00222018	5	0.000477112	0.00172773	-0.0233157	0.00167553	-0.0216402	0.00222018	5
G5150_P3G06-SC_37C	G5150_P3G06	5150	P3G06	P3_SC_37C	SC_37C	AGTGTTAATCAGACC	-0.00593907	0.00346255	5	0.152893	0.214692	-0.0221393	0.0162002	-0.00593907	0.00346255	5
G5150_P3G06-SC_37C	G5150_P3G06	5150	P3G06	P3_SC_37C	SC_37C	AGTTTATAAAAAATT	-0.00557837	0.00243052	4	0.093559	0.142217	0.0188846	-0.024463	-0.00557837	0.00243052	4
G5150_P3G06-SC_37C	G5150_P3G06	5150	P3G06	P3_SC_37C	SC_37C	ATAGAGCGGCGTTGA	-0.0148618	0.00223396	5	0.0020638	0.0057656	-0.0178801	0.00301823	-0.0148618	0.00223396	5
G5150_P3G06-SC_37C	G5150_P3G06	5150	P3G06	P3_SC_37C	SC_37C	ATATTGAGTAAGTAC	-0.00941617	0.00452089	5	0.101864	0.152349	-0.0106469	0.00123075	-0.00941617	0.00452089	5
G5150_P3G06-SC_37C	G5150_P3G06	5150	P3G06	P3_SC_37C	SC_37C	ATCGTTGGCATTTGG	-0.0567781	0.00205773	5	7.46241e-06	5.99737e-05	-0.0437201	-0.013058	-0.0567781	0.00205773	5
G5150_P3G06-SC_37C	G5150_P3G06	5150	P3G06	P3_SC_37C	SC_37C	ATGGCGATGGTCTTG	0.00584643	0.00231351	5	0.0547072	0.09012	-0.007843	0.0136894	0.00584643	0.00231351	5
G5150_P3G06-SC_37C	G5150_P3G06	5150	P3G06	P3_SC_37C	SC_37C	ATTATCAAGTGCCAG	-0.0549047	0.00775497	5	0.00205991	0.005756	-0.104003	0.0490983	-0.0549047	0.00775497	5
G5150_P3G06-SC_37C	G5150_P3G06	5150	P3G06	P3_SC_37C	SC_37C	ATTATCATCGCCATC	-0.153115	0.0480265	3	0.0858769	0.132381	-0.127728	-0.0253875	-0.153115	0.0480265	3
G5150_P3G06-SC_37C	G5150_P3G06	5150	P3G06	P3_SC_37C	SC_37C	CAAGGATCCCCGTAG	-0.00122852	0.00245892	4	0.634271	0.702258	-0.0174624	0.0162339	-0.00122852	0.00245892	4
G5150_P3G06-SC_37C	G5150_P3G06	5150	P3G06	P3_SC_37C	SC_37C	CAAGTTCGGCGAAAT	0.00108766	0.00222219	3	0.652702	0.718007	-0.00943237	0.01052	0.00108766	0.00222219	3
G5150_P3G06-SC_37C	G5150_P3G06	5150	P3G06	P3_SC_37C	SC_37C	CAATCTTGAATTGAT	-0.0180737	0.00408266	5	0.01072	0.0231638	-0.000313742	-0.01776	-0.0180737	0.00408266	5
G5150_P3G06-SC_37C	G5150_P3G06	5150	P3G06	P3_SC_37C	SC_37C	CATATGCATTCCTTG	-0.0101956	0.00457016	5	0.0861943	0.132771	-0.00684678	-0.00334882	-0.0101956	0.00457016	5
G5150_P3G06-SC_37C	G5150_P3G06	5150	P3G06	P3_SC_37C	SC_37C	CATCAATGAGGCAGT	-0.148742	0.00661615	3	0.00194457	0.00548044	-0.195177	0.046435	-0.148742	0.00661615	3
G5150_P3G06-SC_37C	G5150_P3G06	5150	P3G06	P3_SC_37C	SC_37C	CATTGTCGGACGCTT	-0.0749976	0.0192339	3	0.0598289	0.0972326			-0.0749976	0.0192339	3
G5150_P3G06-SC_37C	G5150_P3G06	5150	P3G06	P3_SC_37C	SC_37C	CCAACACAGGCTTCG	-0.0470031	0.00214353	5	1.91356e-05	0.000127064	-0.0257215	-0.0212816	-0.0470031	0.00214353	5
G5150_P3G06-SC_37C	G5150_P3G06	5150	P3G06	P3_SC_37C	SC_37C	CCAAGACCGTGTAAA	-0.0947019	0.0107612	3	0.0126004	0.0264603	-0.233836	0.139135	-0.0947019	0.0107612	3
G5150_P3G06-SC_37C	G5150_P3G06	5150	P3G06	P3_SC_37C	SC_37C	CCAGGATGTACCGCC	-0.0916718	0.0108409	3	0.0136268	0.0281554	-0.0966343	0.0049625	-0.0916718	0.0108409	3
G5150_P3G06-SC_37C	G5150_P3G06	5150	P3G06	P3_SC_37C	SC_37C	CCGTTAGTATCGCTA	0.00337381	0.00279016	4	0.296483	0.37389	-0.00985291	0.0132267	0.00337381	0.00279016	4
G5150_P3G06-SC_37C	G5150_P3G06	5150	P3G06	P3_SC_37C	SC_37C	CGATGATGATGATGA	-0.000463477	0.00132818	5	0.686415	0.74796	-0.00514166	0.00467819	-0.000463477	0.00132818	5
G5150_P3G06-SC_37C	G5150_P3G06	5150	P3G06	P3_SC_37C	SC_37C	CGCGATCAATCCTCT	-0.025613	0.00854102	3	0.0948242	0.143802	-0.0589946	0.0333816	-0.025613	0.00854102	3
G5150_P3G06-SC_37C	G5150_P3G06	5150	P3G06	P3_SC_37C	SC_37C	CTAAGCAGTCTTCTC	-0.11317	0.00580077	5	3.92143e-05	0.000225736	-0.147803	0.0346332	-0.11317	0.00580077	5
G5150_P3G06-SC_37C	G5150_P3G06	5150	P3G06	P3_SC_37C	SC_37C	CTACTTACAACGGAA	0.00436821	0.00118556	5	0.00778198	0.0176512	-0.000334256	0.00470247	0.00436821	0.00118556	5
G5150_P3G06-SC_37C	G5150_P3G06	5150	P3G06	P3_SC_37C	SC_37C	CTAGTTGTATAGCCA	-0.0931238	0.00479811	4	0.000286766	0.00113082	-0.0337863	-0.0593375	-0.0931238	0.00479811	4
G5150_P3G06-SC_37C	G5150_P3G06	5150	P3G06	P3_SC_37C	SC_37C	CTATCAAGGCTTAAT	-0.0246806	0.00298932	3	0.01337	0.027726	-0.00951787	-0.0151628	-0.0246806	0.00298932	3
G5150_P3G06-SC_37C	G5150_P3G06	5150	P3G06	P3_SC_37C	SC_37C	CTCGCTAATACTCCT	-0.00191729	0.00101289	5	0.0387685	0.0674214	-0.0144155	0.0124982	-0.00191729	0.00101289	5
G5150_P3G06-SC_37C	G5150_P3G06	5150	P3G06	P3_SC_37C	SC_37C	CTCTTGAGAATACTT	-0.0224834	0.00326584	5	0.00208331	0.00581088	-0.100861	0.078378	-0.0224834	0.00326584	5
G5150_P3G06-SC_37C	G5150_P3G06	5150	P3G06	P3_SC_37C	SC_37C	CTTGATCAATCAAAA	-0.0825884	0.006838	5	0.000262517	0.00104646	-0.0987804	0.016192	-0.0825884	0.006838	5
G5150_P3G06-SC_37C	G5150_P3G06	5150	P3G06	P3_SC_37C	SC_37C	CTTGCAAGTGTAATT	-0.00139721	0.001698	4	0.421012	0.501151	-0.00269507	0.00129786	-0.00139721	0.001698	4
G5150_P3G06-SC_37C	G5150_P3G06	5150	P3G06	P3_SC_37C	SC_37C	CTTTCTTGTGTATTT	-0.0306812	0.00149994	5	1.76589e-05	0.000118837	-0.080249	0.0495678	-0.0306812	0.00149994	5
G5150_P3G06-SC_37C	G5150_P3G06	5150	P3G06	P3_SC_37C	SC_37C	GAACTCAGGTTCCAT	-0.0952474	0.0223497	4	0.0236583	0.0446533	-0.0336499	-0.0615975	-0.0952474	0.0223497	4
G5150_P3G06-SC_37C	G5150_P3G06	5150	P3G06	P3_SC_37C	SC_37C	GAGAATGAAGGACAG	-0.0366137	0.00694403	5	0.00605756	0.0142376	-0.0393988	0.00278514	-0.0366137	0.00694403	5
G5150_P3G06-SC_37C	G5150_P3G06	5150	P3G06	P3_SC_37C	SC_37C	GAGTGCTTCAAAGTT	0.00832625	0.00170575	5	0.00529534	0.0126878	0.00639281	0.00193344	0.00832625	0.00170575	5
G5150_P3G06-SC_37C	G5150_P3G06	5150	P3G06	P3_SC_37C	SC_37C	GCAAGAAAGAAACCC	-0.0788522	0.00847838	3	0.0112671	0.0241367	-0.0501908	-0.0286614	-0.0788522	0.00847838	3
G5150_P3G06-SC_37C	G5150_P3G06	5150	P3G06	P3_SC_37C	SC_37C	GCCCTCGAAACCTAT	-0.0690149	0.00805636	5	0.00100098	0.00317897	-0.0594649	-0.00954997	-0.0690149	0.00805636	5
G5150_P3G06-SC_37C	G5150_P3G06	5150	P3G06	P3_SC_37C	SC_37C	GCTGCTTATGAGGAT	-0.00210542	0.00194583	5	0.301868	0.379643	-0.00893866	0.00683324	-0.00210542	0.00194583	5
G5150_P3G06-SC_37C	G5150_P3G06	5150	P3G06	P3_SC_37C	SC_37C	GGTTGCCCAGAAGTA	-0.0581697	0.00236943	5	1.29139e-05	9.32166e-05	-0.036133	-0.0220367	-0.0581697	0.00236943	5
G5150_P3G06-SC_37C	G5150_P3G06	5150	P3G06	P3_SC_37C	SC_37C	GTACAAGAAATTTTG	-0.00729314	0.00755033	5	0.386409	0.466153	-0.0137529	0.00645974	-0.00729314	0.00755033	5
G5150_P3G06-SC_37C	G5150_P3G06	5150	P3G06	P3_SC_37C	SC_37C	GTGTGATTACTAAAT	-0.0957237	0.00619893	4	0.000575779	0.00201587	-0.0463609	-0.0493628	-0.0957237	0.00619893	4
G5150_P3G06-SC_37C	G5150_P3G06	5150	P3G06	P3_SC_37C	SC_37C	GTTAAATCAACAGTT	-0.0058969	0.00269142	5	0.0836519	0.129592	-0.0321192	0.0262223	-0.0058969	0.00269142	5
G5150_P3G06-SC_37C	G5150_P3G06	5150	P3G06	P3_SC_37C	SC_37C	GTTCAGCTTTGATCG	-0.0850553	0.00600126	5	0.000139015	0.000626978	-0.213555	0.128499	-0.0850553	0.00600126	5
G5150_P3G06-SC_37C	G5150_P3G06	5150	P3G06	P3_SC_37C	SC_37C	GTTGAACTGGTTGTT	-0.0224364	0.00153792	3	0.00343789	0.00882642	-0.00922277	-0.0132136	-0.0224364	0.00153792	3
G5150_P3G06-SC_37C	G5150_P3G06	5150	P3G06	P3_SC_37C	SC_37C	GTTGGGCGCTTAAAG	-0.001251	0.00266087	5	0.648238	0.714281	-0.000664285	-0.000586711	-0.001251	0.00266087	5
G5150_P3G06-SC_37C	G5150_P3G06	5150	P3G06	P3_SC_37C	SC_37C	GTTTAGCTTCCGTTG	-0.0919089	0.00620005	4	0.000650036	0.00223441	-0.0426792	-0.0492297	-0.0919089	0.00620005	4
G5150_P3G06-SC_37C	G5150_P3G06	5150	P3G06	P3_SC_37C	SC_37C	GTTTGTTTTGGGAAA	-0.119096	0.0161073	4	0.00509867	0.0122867	-0.082592	-0.0365041	-0.119096	0.0161073	4
G5150_P3G06-SC_37C	G5150_P3G06	5150	P3G06	P3_SC_37C	SC_37C	TAACCTCGCGCTGAG	-0.0065549	0.00417209	3	0.2507	0.325107	0.00308065	-0.00963555	-0.0065549	0.00417209	3
G5150_P3G06-SC_37C	G5150_P3G06	5150	P3G06	P3_SC_37C	SC_37C	TATATTGAACTTTAC	-0.000907608	0.00219318	5	0.680209	0.742236	0.0042387	-0.00514631	-0.000907608	0.00219318	5
G5150_P3G06-SC_37C	G5150_P3G06	5150	P3G06	P3_SC_37C	SC_37C	TATGCCCTTCTTCTG	-0.00311347	0.003396	4	0.415367	0.495284	-0.0127424	0.00962897	-0.00311347	0.003396	4
G5150_P3G06-SC_37C	G5150_P3G06	5150	P3G06	P3_SC_37C	SC_37C	TCAAAACGGAGTGTT	0.000994972	0.00143115	5	0.451087	0.530613	-0.00216713	0.0031621	0.000994972	0.00143115	5
G5150_P3G06-SC_37C	G5150_P3G06	5150	P3G06	P3_SC_37C	SC_37C	TCAAAGCATGAAAAA	-0.0345122	0.00281925	4	0.00103996	0.00327969	-0.0702694	0.0357572	-0.0345122	0.00281925	4
G5150_P3G06-SC_37C	G5150_P3G06	5150	P3G06	P3_SC_37C	SC_37C	TCAAATGATGAGGAT	-0.0166235	0.00118132	5	4.57192e-05	0.000253912	-0.0161742	-0.000449324	-0.0166235	0.00118132	5
G5150_P3G06-SC_37C	G5150_P3G06	5150	P3G06	P3_SC_37C	SC_37C	TCAACAACCTATGCA	-0.00792011	0.00230507	3	0.0672771	0.107362	0.00126751	-0.00918762	-0.00792011	0.00230507	3
G5150_P3G06-SC_37C	G5150_P3G06	5150	P3G06	P3_SC_37C	SC_37C	TCAGAGCATTGGCCT	-0.0461485	0.0115588	3	0.0571418	0.0934999			-0.0461485	0.0115588	3
G5150_P3G06-SC_37C	G5150_P3G06	5150	P3G06	P3_SC_37C	SC_37C	TCATAGGTATCTCGC	-0.000231322	0.00133225	5	0.839717	0.875124	-0.0034091	0.00317777	-0.000231322	0.00133225	5
G5150_P3G06-SC_37C	G5150_P3G06	5150	P3G06	P3_SC_37C	SC_37C	TCGAAAGCACAGTAG	-0.0747788	0.0134583	4	0.0114434	0.024461	-0.151621	0.0768418	-0.0747788	0.0134583	4
G5150_P3G06-SC_37C	G5150_P3G06	5150	P3G06	P3_SC_37C	SC_37C	TCGATAGAATTTACT	-0.041346	0.0052169	5	0.00131258	0.00397701	-0.0528411	0.0114951	-0.041346	0.0052169	5
G5150_P3G06-SC_37C	G5150_P3G06	5150	P3G06	P3_SC_37C	SC_37C	TCTTGGAGGTGAATG	-0.0348908	0.0027162	4	0.000893088	0.00288591	-0.0609332	0.0260424	-0.0348908	0.0027162	4
G5150_P3G06-SC_37C	G5150_P3G06	5150	P3G06	P3_SC_37C	SC_37C	TGGAGTCTTTGTTGA	-0.0543148	0.00691668	3	0.0156303	0.0316544	-0.0760209	0.0217061	-0.0543148	0.00691668	3
G5150_P3G06-SC_37C	G5150_P3G06	5150	P3G06	P3_SC_37C	SC_37C	TTAATTAGAGGTATG	-0.00588045	0.00192761	4	0.0442153	0.0753165	-0.0165451	0.0106647	-0.00588045	0.00192761	4
G5150_P3G06-SC_37C	G5150_P3G06	5150	P3G06	P3_SC_37C	SC_37C	TTAGTCTTTCCATCA	-0.0346059	0.00268843	5	0.000175837	0.000755052	-0.183045	0.148439	-0.0346059	0.00268843	5
G5150_P3G06-SC_37C	G5150_P3G06	5150	P3G06	P3_SC_37C	SC_37C	TTATATTTATTTGCT	-0.00191498	0.00140164	4	0.196514	0.264647	-0.0132206	0.0113056	-0.00191498	0.00140164	4
G5150_P3G06-SC_37C	G5150_P3G06	5150	P3G06	P3_SC_37C	SC_37C	TTTAACTCACCGTAA	-0.0283756	0.00238891	4	0.00108097	0.00338504	-0.0184056	-0.00996991	-0.0283756	0.00238891	4
G5150_P3G06-SC_37C	G5150_P3G06	5150	P3G06	P3_SC_37C	SC_37C	TTTATAAATCAATAG	0.00174249	0.00123284	5	0.139176	0.198184	-0.000226545	0.00196903	0.00174249	0.00123284	5
G5150_P3G06-SC_37C	G5150_P3G06	5150	P3G06	P3_SC_37C	SC_37C	TTTTGCATTTAGGCG	-0.059135	0.0042193	5	0.000140142	0.000631375	-0.00776484	-0.0513702	-0.059135	0.0042193	5
G10150_P1C04-SC_37C	G10150_P1C04	10150	P1C04	P1_SC_37C	SC_37C	AAAACATTATCAAAG	0.00481775	0.00173185	10	0.000461408	0.0016772	-0.000652642	0.00547039	0.00699554	0.00251608	5	0.00324884	0.00213558	5
G10150_P1C04-SC_37C	G10150_P1C04	10150	P1C04	P1_SC_37C	SC_37C	AAAAGAAAAATGTAT	-0.0440484	0.00603211	10	9.98966e-05	0.000480283	0.0418506	-0.085899	-0.0410038	0.00323055	5	-0.0626431	0.00798374	5
G10150_P1C04-SC_37C	G10150_P1C04	10150	P1C04	P1_SC_37C	SC_37C	AAAAGCGACATTTCT	-0.0159265	0.00256423	9	0.00325261	0.00841714	-0.0616103	0.0456838	-0.0150479	0.00488592	4	-0.0162227	0.00283719	5
G10150_P1C04-SC_37C	G10150_P1C04	10150	P1C04	P1_SC_37C	SC_37C	ACAACCTACCTGCTA	0.00127849	0.00207796	10	0.183776	0.25047	-0.00161883	0.00289732	-0.00260571	0.00320487	5	0.00279443	0.00200217	5
G10150_P1C04-SC_37C	G10150_P1C04	10150	P1C04	P1_SC_37C	SC_37C	ACAAGTTTTACAGTT	-0.0316051	0.00451704	10	0.00026121	0.00104225	0.021037	-0.0526421	-0.0349655	0.0045731	5	-0.0234602	0.00711973	5
G10150_P1C04-SC_37C	G10150_P1C04	10150	P1C04	P1_SC_37C	SC_37C	ACAGGGCAGCTCCCG	-0.0457433	0.00511796	8	0.00252895	0.00681123	-0.0292694	-0.0164739	-0.0427015	0.011806	3	-0.0463745	0.00537785	5
G10150_P1C04-SC_37C	G10150_P1C04	10150	P1C04	P1_SC_37C	SC_37C	ACAGTTGACGGACAG	0.00336701	0.00232012	10	0.841945	0.876785	0.00149213	0.00187488	-0.000413563	0.00278912	5	0.00732647	0.00285434	5
G10150_P1C04-SC_37C	G10150_P1C04	10150	P1C04	P1_SC_37C	SC_37C	ACCACCGGTCCTGCC	-0.0138918	0.00382092	10	0.00815314	0.0184026	-0.00133408	-0.0125577	-0.0178596	0.00641863	5	-0.0120689	0.00435058	5
G10150_P1C04-SC_37C	G10150_P1C04	10150	P1C04	P1_SC_37C	SC_37C	AGAACATCATCTACA	-0.0693409	0.0240642	9	0.123118	0.178833			-0.0626868	0.0178952	4	-0.102683	0.0400583	5
G10150_P1C04-SC_37C	G10150_P1C04	10150	P1C04	P1_SC_37C	SC_37C	AGAAGACGACGATGA	-0.0458765	0.0016705	10	3.57659e-11	1.3104e-08	-0.0269064	-0.0189701	-0.0434713	0.00231804	5	-0.047709	0.00202338	5
G10150_P1C04-SC_37C	G10150_P1C04	10150	P1C04	P1_SC_37C	SC_37C	AGATTCATCCCATGG	0.00449665	0.00175111	10	0.130117	0.187211	-0.00105522	0.00555187	0.00204828	0.0025412	5	0.00614817	0.0020871	5
G10150_P1C04-SC_37C	G10150_P1C04	10150	P1C04	P1_SC_37C	SC_37C	AGTGTATGATAATAT	-0.010173	0.0063079	10	1.17498e-08	5.07757e-07	-0.01028	0.00010699	-0.0344544	0.00299898	5	-0.00153403	0.00178882	5
G10150_P1C04-SC_37C	G10150_P1C04	10150	P1C04	P1_SC_37C	SC_37C	AGTGTTAATCAGACC	-0.00621892	0.00674196	10	0.701551	0.760462	-0.0454435	0.0392245	-0.00389702	0.00945087	5	-0.0091042	0.0105352	5
G10150_P1C04-SC_37C	G10150_P1C04	10150	P1C04	P1_SC_37C	SC_37C	AGTTTATAAAAAATT	-0.0386772	0.0142798	9	0.240019	0.31354	0.0647237	-0.103401	-0.0237114	0.013868	4	-0.0673053	0.0191804	5
G10150_P1C04-SC_37C	G10150_P1C04	10150	P1C04	P1_SC_37C	SC_37C	ATAATTTTCATCCAC	-0.0203611	0.020622	6	0.508311	0.585432	-0.0111715	-0.00918961	-0.018941	0.014242	4	-0.0502508	0.0653389	2
G10150_P1C04-SC_37C	G10150_P1C04	10150	P1C04	P1_SC_37C	SC_37C	ATAGAGCGGCGTTGA	-0.0166935	0.00873532	10	0.243471	0.317317	-0.011058	-0.00563547	-0.0162085	0.00634467	5	-0.0202962	0.017292	5
G10150_P1C04-SC_37C	G10150_P1C04	10150	P1C04	P1_SC_37C	SC_37C	ATATTGAGTAAGTAC	-0.000892505	0.00463196	9	0.865072	0.895058	0.00108997	-0.00198247	0.00115538	0.00429179	4	-0.00699731	0.00741006	5
G10150_P1C04-SC_37C	G10150_P1C04	10150	P1C04	P1_SC_37C	SC_37C	ATCGTTGGCATTTGG	-0.0588039	0.0134583	10	0.0611414	0.0990041	-0.105906	0.0471019	-0.0394542	0.0193626	5	-0.0737615	0.0170239	5
G10150_P1C04-SC_37C	G10150_P1C04	10150	P1C04	P1_SC_37C	SC_37C	ATGAAGTTCATAATG	-0.0294325	0.0113446	4	0.438259	0.518609	0.0266474	-0.0560799	-0.0263741	0.0275593	1	-0.0304562	0.0159436	3
G10150_P1C04-SC_37C	G10150_P1C04	10150	P1C04	P1_SC_37C	SC_37C	ATGGCGATGGTCTTG	-0.000503615	0.0053164	9	0.746893	0.797809	-0.00278687	0.00228326	0.00205844	0.00440363	5	-0.0122081	0.0094122	4
G10150_P1C04-SC_37C	G10150_P1C04	10150	P1C04	P1_SC_37C	SC_37C	ATTATCAAGTGCCAG	-0.0764519	0.0111285	8	0.0186279	0.0365544	-0.0673298	-0.00912207	-0.0546849	0.0220907	3	-0.0818446	0.0109955	5
G10150_P1C04-SC_37C	G10150_P1C04	10150	P1C04	P1_SC_37C	SC_37C	ATTATCATCGCCATC	-0.122296	0.00231705	3	0.00294591	0.00774366	-0.0768754	-0.0454209	-0.119394	0.00233086	2	-0.124085	0.00182965	1
G10150_P1C04-SC_37C	G10150_P1C04	10150	P1C04	P1_SC_37C	SC_37C	CAAGGATCCCCGTAG	-0.00881853	0.00187687	8	0.000774835	0.0025727	-0.0256483	0.0168298	-0.0110499	0.00247509	3	-0.00690739	0.00229059	5
G10150_P1C04-SC_37C	G10150_P1C04	10150	P1C04	P1_SC_37C	SC_37C	CAAGTTCGGCGAAAT	0.00499107	0.00251286	7	0.174645	0.239783	-0.00314285	0.00813392	0.00552927	0.00556149	3	0.004902	0.00226243	4
G10150_P1C04-SC_37C	G10150_P1C04	10150	P1C04	P1_SC_37C	SC_37C	CAATCTTGAATTGAT	0.00371043	0.00210291	10	0.0409888	0.0705733	0.0141933	-0.0104829	0.00538987	0.00296883	5	0.00202156	0.00297715	5
G10150_P1C04-SC_37C	G10150_P1C04	10150	P1C04	P1_SC_37C	SC_37C	CAATTTCAACGTTGT	-0.0758057	0.0117423	6	0.183399	0.250121	-0.0641989	-0.0116069	-0.0255005	0.0160322	1	-0.0862018	0.00728821	5
G10150_P1C04-SC_37C	G10150_P1C04	10150	P1C04	P1_SC_37C	SC_37C	CATATGCATTCCTTG	-0.00503656	0.0032105	10	0.381512	0.461497	-0.00930645	0.0042699	-0.00386531	0.00339119	5	-0.00821511	0.00558655	5
G10150_P1C04-SC_37C	G10150_P1C04	10150	P1C04	P1_SC_37C	SC_37C	CATCAATGAGGCAGT	-0.156969	0.0113619	10	1.48409e-05	0.000103628	-0.170366	0.0133971	-0.145965	0.0149815	5	-0.170633	0.016695	5
G10150_P1C04-SC_37C	G10150_P1C04	10150	P1C04	P1_SC_37C	SC_37C	CATTTATGGCTATCT	-0.0645579	0.0116972	6	0.0190627	0.0372551	-0.0900852	0.0255273	-0.0590197	0.0105489	3	-0.0833903	0.0194527	3
G10150_P1C04-SC_37C	G10150_P1C04	10150	P1C04	P1_SC_37C	SC_37C	CCAACACAGGCTTCG	-0.0127655	0.00271473	10	0.0381477	0.066481	0.00488293	-0.0176484	-0.00591666	0.0037865	5	-0.0151139	0.00221728	5
G10150_P1C04-SC_37C	G10150_P1C04	10150	P1C04	P1_SC_37C	SC_37C	CCAAGACCGTGTAAA	-0.119467	0.0391256	5	0.00313141	0.00816407	-0.232802	0.113335	-0.113143	0.00326989	2	-0.218625	0.0129478	3
G10150_P1C04-SC_37C	G10150_P1C04	10150	P1C04	P1_SC_37C	SC_37C	CCAGGATGTACCGCC	-0.00389392	0.00410283	7	0.00271332	0.00722528	-0.104767	0.100873	-0.0139217	0.00260994	2	0.00460215	0.00240235	5
G10150_P1C04-SC_37C	G10150_P1C04	10150	P1C04	P1_SC_37C	SC_37C	CCGTTAGTATCGCTA	-0.00866033	0.00492822	8	0.165701	0.229706	-0.019524	0.0108636	-0.00973848	0.00489451	5	-0.0027886	0.0114223	3
G10150_P1C04-SC_37C	G10150_P1C04	10150	P1C04	P1_SC_37C	SC_37C	CGAACAGAAACACAA	0.00975703	0.0035447	6	0.0254234	0.047403	-0.0509589	0.0607159	0.0136193	0.00483472	4	0.00711257	0.00400053	2
G10150_P1C04-SC_37C	G10150_P1C04	10150	P1C04	P1_SC_37C	SC_37C	CGAATGCCATACAAA	0.00376985	0.00418975	7	0.927026	0.944451	-0.0187919	0.0225618	0.000513317	0.0039158	3	0.010811	0.0057579	4
G10150_P1C04-SC_37C	G10150_P1C04	10150	P1C04	P1_SC_37C	SC_37C	CGATGATGATGATGA	0.00274103	0.00488034	10	0.107662	0.159737	-0.00559316	0.00833419	0.0114251	0.0090427	5	0.00213984	0.00237926	5
G10150_P1C04-SC_37C	G10150_P1C04	10150	P1C04	P1_SC_37C	SC_37C	CGCGATCAATCCTCT	-0.0766393	0.0229277	5	0.0616929	0.0997308	-0.0319146	-0.0447246	-0.134096	0.0460411	1	-0.0622357	0.0230521	4
G10150_P1C04-SC_37C	G10150_P1C04	10150	P1C04	P1_SC_37C	SC_37C	CTAAGCAGTCTTCTC	-0.0404252	0.00565175	9	0.000512178	0.00183128	-0.133331	0.0929054	-0.0366066	0.00357749	4	-0.0551236	0.00701884	5
G10150_P1C04-SC_37C	G10150_P1C04	10150	P1C04	P1_SC_37C	SC_37C	CTACTTACAACGGAA	0.00319122	0.00148679	9	0.0179115	0.035439	2.16745e-05	0.00316955	0.00240416	0.00242955	4	0.0036082	0.00176839	5
G10150_P1C04-SC_37C	G10150_P1C04	10150	P1C04	P1_SC_37C	SC_37C	CTAGTTGTATAGCCA	0.0122913	0.00554741	8	0.174485	0.239589	-0.0228617	0.035153	0.0126084	0.00534691	4	0.0110341	0.0106459	4
G10150_P1C04-SC_37C	G10150_P1C04	10150	P1C04	P1_SC_37C	SC_37C	CTATCAAGGCTTAAT	0.00191958	0.0246833	10	0.94126	0.955385	0.0109081	-0.00898854	0.00227136	0.00319098	5	-0.0596639	0.0422202	5
G10150_P1C04-SC_37C	G10150_P1C04	10150	P1C04	P1_SC_37C	SC_37C	CTCGCTAATACTCCT	-0.00314043	0.00250002	10	0.00036889	0.00139462	-0.0375804	0.0344399	-0.0092342	0.00270249	5	0.00143979	0.00234295	5
G10150_P1C04-SC_37C	G10150_P1C04	10150	P1C04	P1_SC_37C	SC_37C	CTCTTGAGAATACTT	-0.047176	0.0164613	8	0.0627241	0.101156	-0.0948968	0.0477208	-0.0321682	0.00734412	3	-0.0936745	0.0129271	5
G10150_P1C04-SC_37C	G10150_P1C04	10150	P1C04	P1_SC_37C	SC_37C	CTGATTTGTGCTGTC	-0.0476658	0.0232712	3	0.611374	0.681329	0.0375917	-0.0852576	-0.0391297	0.0559781	1	-0.0519343	0.0395847	2
G10150_P1C04-SC_37C	G10150_P1C04	10150	P1C04	P1_SC_37C	SC_37C	CTTGATCAATCAAAA	-0.0484569	0.0019553	10	9.65227e-10	1.0691e-07	-0.0824445	0.0339876	-0.0517566	0.00297554	5	-0.0468883	0.00205157	5
G10150_P1C04-SC_37C	G10150_P1C04	10150	P1C04	P1_SC_37C	SC_37C	CTTGCAAGTGTAATT	0.0125635	0.00164603	10	1.35818e-05	9.67343e-05	0.000560442	0.0120031	0.0124517	0.00268253	5	0.0126286	0.00204639	5
G10150_P1C04-SC_37C	G10150_P1C04	10150	P1C04	P1_SC_37C	SC_37C	CTTTCTTGTGTATTT	-0.0210224	0.0158641	5	0.638261	0.70536	-0.0498822	0.0288597	0.0169832	0.0326638	1	-0.0305757	0.0163764	4
G10150_P1C04-SC_37C	G10150_P1C04	10150	P1C04	P1_SC_37C	SC_37C	GAACTCAGGTTCCAT	-0.0302732	0.00309359	9	0.000244497	0.000987263	-0.0442945	0.0140213	-0.0266036	0.00405826	4	-0.0340875	0.00413755	5
G10150_P1C04-SC_37C	G10150_P1C04	10150	P1C04	P1_SC_37C	SC_37C	GAGAATGAAGGACAG	-0.075978	0.00344528	10	1.77856e-09	1.53858e-07	0.00446468	-0.0804427	-0.0676617	0.00302317	5	-0.0842468	0.00301453	5
G10150_P1C04-SC_37C	G10150_P1C04	10150	P1C04	P1_SC_37C	SC_37C	GAGTGCTTCAAAGTT	0.00565783	0.00210255	10	0.0394196	0.0683628	0.0186933	-0.0130355	0.00582186	0.00385315	5	0.00561105	0.00205784	5
G10150_P1C04-SC_37C	G10150_P1C04	10150	P1C04	P1_SC_37C	SC_37C	GCAAGAAAGAAACCC	-0.0151102	0.0112038	5	0.215659	0.286556	-0.0257965	0.0106863	-0.0382952	0.024582	1	-0.0092581	0.0123501	4
G10150_P1C04-SC_37C	G10150_P1C04	10150	P1C04	P1_SC_37C	SC_37C	GCCCTCGAAACCTAT	-0.0741435	0.0191975	6	0.163794	0.227291	-0.0598668	-0.0142767	-0.0883114	0.0519083	1	-0.071301	0.023251	5
G10150_P1C04-SC_37C	G10150_P1C04	10150	P1C04	P1_SC_37C	SC_37C	GCTGCTTATGAGGAT	0.00301685	0.0022374	10	0.0398342	0.0689522	-0.0056472	0.00866405	0.00525796	0.00253939	5	-0.000672418	0.00325813	5
G10150_P1C04-SC_37C	G10150_P1C04	10150	P1C04	P1_SC_37C	SC_37C	GGTGGAAGTAGCAGT	-0.000124547	0.00435779	7	0.877887	0.90521	0.00243518	-0.00255972	0.00132642	0.004258	2	-0.00293266	0.00592359	5
G10150_P1C04-SC_37C	G10150_P1C04	10150	P1C04	P1_SC_37C	SC_37C	GGTTGCCCAGAAGTA	-0.036514	0.00455512	10	6.96014e-06	5.6751e-05	-0.0194968	-0.0170172	-0.0485852	0.00633844	5	-0.0327706	0.00352973	5
G10150_P1C04-SC_37C	G10150_P1C04	10150	P1C04	P1_SC_37C	SC_37C	GTAATCTGACTCTAG	-0.0191586	0.00895832	9	0.173215	0.238135	0.0077402	-0.0268989	-0.0166317	0.00440337	4	-0.0403499	0.0127517	5
G10150_P1C04-SC_37C	G10150_P1C04	10150	P1C04	P1_SC_37C	SC_37C	GTACAAGAAATTTTG	-0.015875	0.00650457	8	0.000725199	0.00243827	-0.0434344	0.0275594	-0.0283852	0.00505906	5	0.00121525	0.00591306	3
G10150_P1C04-SC_37C	G10150_P1C04	10150	P1C04	P1_SC_37C	SC_37C	GTCACCGGCACTAAC	0.00402383	0.0023193	9	0.71578	0.772524	-0.0259069	0.0299308	0.00103479	0.00421987	4	0.00495621	0.00235684	5
G10150_P1C04-SC_37C	G10150_P1C04	10150	P1C04	P1_SC_37C	SC_37C	GTGTGATTACTAAAT	-0.028355	0.0142339	9	0.271921	0.348024	-0.0108598	-0.0174953	-0.0266756	0.0107639	4	-0.0375863	0.0252362	5
G10150_P1C04-SC_37C	G10150_P1C04	10150	P1C04	P1_SC_37C	SC_37C	GTTAAATCAACAGTT	-0.00575004	0.00244978	10	0.0962193	0.145497	-0.0412742	0.0355241	-0.00570632	0.00321426	5	-0.00581718	0.00398358	5
G10150_P1C04-SC_37C	G10150_P1C04	10150	P1C04	P1_SC_37C	SC_37C	GTTCAGCTTTGATCG	-0.334648	0.0148445	9	7.83e-07	1.03764e-05	-0.124119	-0.210529	-0.294236	0.0252737	4	-0.339484	0.00874253	5
G10150_P1C04-SC_37C	G10150_P1C04	10150	P1C04	P1_SC_37C	SC_37C	GTTGAACTGGTTGTT	0.0301373	0.00220034	9	1.11212e-06	1.34894e-05	-0.0331275	0.0632648	0.0332651	0.00283012	4	0.0272331	0.00272704	5
G10150_P1C04-SC_37C	G10150_P1C04	10150	P1C04	P1_SC_37C	SC_37C	GTTGGGCGCTTAAAG	0.00320829	0.00221763	10	0.181368	0.247785	-0.00339134	0.00659964	-0.00228023	0.00303749	5	0.0052848	0.00186833	5
G10150_P1C04-SC_37C	G10150_P1C04	10150	P1C04	P1_SC_37C	SC_37C	GTTTAGCTTCCGTTG	-0.00450269	0.00566897	9	0.996806	0.997207	0.000432998	-0.00493569	2.01171e-05	0.00298629	4	-0.0214415	0.00577923	5
G10150_P1C04-SC_37C	G10150_P1C04	10150	P1C04	P1_SC_37C	SC_37C	GTTTGTTTTGGGAAA	-0.178988	0.0169599	8	0.000191135	0.000810958	-0.140287	-0.0387006	-0.168255	0.0141718	4	-0.214902	0.0259231	4
G10150_P1C04-SC_37C	G10150_P1C04	10150	P1C04	P1_SC_37C	SC_37C	TAACCTCGCGCTGAG	-0.00540772	0.00805779	7	0.175115	0.240217	0.0247705	-0.0301782	-0.0186923	0.0167045	3	-0.00346047	0.00639544	4
G10150_P1C04-SC_37C	G10150_P1C04	10150	P1C04	P1_SC_37C	SC_37C	TAATATTGTTTTGCG	-0.118474	0.047511	3	0.261264	0.336307	-0.0703753	-0.0480985	-0.0239709	0.0106727	1	-0.165869	0.0075582	2
G10150_P1C04-SC_37C	G10150_P1C04	10150	P1C04	P1_SC_37C	SC_37C	TACACCAATTACACT	-0.169763	0.0174555	8	0.000823859	0.00270299			-0.16333	0.0307709	4	-0.172867	0.0213757	4
G10150_P1C04-SC_37C	G10150_P1C04	10150	P1C04	P1_SC_37C	SC_37C	TAGACGGACATCTTC	-0.00187349	0.00642893	6	0.995963	0.996603	0.0214085	-0.023282	-9.23938e-05	0.0173119	1	-0.00223988	0.00785187	5
G10150_P1C04-SC_37C	G10150_P1C04	10150	P1C04	P1_SC_37C	SC_37C	TATATTGAACTTTAC	-0.0123205	0.00322075	10	0.121578	0.17701	0.0115448	-0.0238654	-0.0063307	0.00479055	5	-0.0153602	0.00341268	5
G10150_P1C04-SC_37C	G10150_P1C04	10150	P1C04	P1_SC_37C	SC_37C	TATGCCCTTCTTCTG	-0.0196955	0.00496597	9	0.0141419	0.0290559	0.00616433	-0.0258599	-0.0241893	0.0109937	4	-0.0192844	0.00332549	5
G10150_P1C04-SC_37C	G10150_P1C04	10150	P1C04	P1_SC_37C	SC_37C	TCAAAACGGAGTGTT	-0.0015811	0.00165771	10	0.00194532	0.0054813	-0.00120033	-0.000380777	-0.00409863	0.00248146	5	-0.000211342	0.00183039	5
G10150_P1C04-SC_37C	G10150_P1C04	10150	P1C04	P1_SC_37C	SC_37C	TCAAAGCATGAAAAA	0.02712	0.00343347	10	1.39455e-08	5.73332e-07	-0.086374	0.113494	0.0162764	0.00229178	5	0.0345967	0.00190301	5
G10150_P1C04-SC_37C	G10150_P1C04	10150	P1C04	P1_SC_37C	SC_37C	TCAAATGATGAGGAT	-0.024871	0.00335024	10	0.000529753	0.00188493	0.0191963	-0.0440673	-0.0240497	0.00272519	5	-0.0290457	0.00614425	5
G10150_P1C04-SC_37C	G10150_P1C04	10150	P1C04	P1_SC_37C	SC_37C	TCAACAACCTATGCA	-0.00428274	0.00287206	10	0.857445	0.888692	0.0238632	-0.028146	0.000542003	0.0035513	5	-0.0089979	0.00351074	5
G10150_P1C04-SC_37C	G10150_P1C04	10150	P1C04	P1_SC_37C	SC_37C	TCATAGGTATCTCGC	0.00279531	0.00152568	10	0.0370521	0.0648984	-0.00351693	0.00631224	0.00233056	0.00257995	5	0.00300124	0.00171738	5
G10150_P1C04-SC_37C	G10150_P1C04	10150	P1C04	P1_SC_37C	SC_37C	TCGAAAGCACAGTAG	-0.0518387	0.0092483	9	0.00114025	0.00353951	-0.135006	0.0831675	-0.0690757	0.0176752	4	-0.0486711	0.00757703	5
G10150_P1C04-SC_37C	G10150_P1C04	10150	P1C04	P1_SC_37C	SC_37C	TCGATAGAATTTACT	-0.156369	0.0278079	3	0.0300085	0.054397	-0.0242833	-0.132086	-0.156369	0.0278079	3
G10150_P1C04-SC_37C	G10150_P1C04	10150	P1C04	P1_SC_37C	SC_37C	TCTTGGAGGTGAATG	-0.0428996	0.00730456	10	0.000701723	0.00237602	-0.0830805	0.040181	-0.0533501	0.0123069	5	-0.0389868	0.00753049	5
G10150_P1C04-SC_37C	G10150_P1C04	10150	P1C04	P1_SC_37C	SC_37C	TGATCATCACGGGAC	-0.0145125	0.0210231	10	0.0338983	0.0602127	-0.0208832	0.00637073	-0.0657316	0.0358448	5	-0.0126582	0.0068202	5
G10150_P1C04-SC_37C	G10150_P1C04	10150	P1C04	P1_SC_37C	SC_37C	TGGAGTCTTTGTTGA	-0.0353584	0.0037785	9	5.39554e-06	4.64173e-05	-0.063193	0.0278346	-0.0289483	0.00244777	4	-0.0460328	0.00315869	5
G10150_P1C04-SC_37C	G10150_P1C04	10150	P1C04	P1_SC_37C	SC_37C	TTAATTAGAGGTATG	-0.0102068	0.00353535	8	0.0121529	0.0256852	-0.0312409	0.0210341	-0.0174065	0.00808968	3	-0.00950849	0.00251944	5
G10150_P1C04-SC_37C	G10150_P1C04	10150	P1C04	P1_SC_37C	SC_37C	TTAATTGCACTTATG	-0.0186316	0.00914537	5	0.304504	0.382495	-0.072662	0.0540304	-0.0183583	0.00244965	2	-0.0287937	0.0149385	3
G10150_P1C04-SC_37C	G10150_P1C04	10150	P1C04	P1_SC_37C	SC_37C	TTAGTCTTTCCATCA	-0.209672	0.0179436	10	3.30009e-07	5.35627e-06	-0.204752	-0.00491974	-0.259718	0.0190067	5	-0.17882	0.0149233	5
G10150_P1C04-SC_37C	G10150_P1C04	10150	P1C04	P1_SC_37C	SC_37C	TTATATTTATTTGCT	-0.000982071	0.00210249	9	0.135265	0.193456	-0.0146704	0.0136884	0.00291341	0.00278894	4	-0.00364504	0.00230591	5
G10150_P1C04-SC_37C	G10150_P1C04	10150	P1C04	P1_SC_37C	SC_37C	TTTAACTCACCGTAA	0.011978	0.00580237	10	0.130961	0.188315	-0.0171085	0.0290865	0.0141561	0.0109134	5	0.0114232	0.00550767	5
G10150_P1C04-SC_37C	G10150_P1C04	10150	P1C04	P1_SC_37C	SC_37C	TTTATAAATCAATAG	0.00282596	0.00155139	10	0.0339391	0.0602679	0.00352976	-0.000703806	0.0026496	0.00259836	5	0.00291124	0.00180695	5
G10150_P1C04-SC_37C	G10150_P1C04	10150	P1C04	P1_SC_37C	SC_37C	TTTTGCATTTAGGCG	-0.0508605	0.00445879	10	2.48463e-05	0.000156794	-0.0117231	-0.0391374	-0.0448305	0.00506191	5	-0.0593328	0.0060001	5
G10150_P1C04-SC_37C	G10150_P1C04	10150	P1C04	P1_SC_37C	SC_37C	TCAGAGCATTGGCCT	-0.0488263	0.0549941	3	0.468124	0.546729						-0.0488263	0.0549941	3
G7530_P1D03-SC_37C	G7530_P1D03	7530	P1D03	P1_SC_37C	SC_37C	AAAACATTATCAAAG	-0.00396862	0.00292601	10	0.00343217	0.00881537	-0.000652642	-0.00331598	-0.0121875	0.00432823	5	-0.00295791	0.00151781	5
G7530_P1D03-SC_37C	G7530_P1D03	7530	P1D03	P1_SC_37C	SC_37C	AAAAGAAAAATGTAT	0.0282005	0.00250126	10	7.78034e-10	9.23044e-08	0.0418506	-0.0136501	0.0355796	0.00178487	5	0.0223723	0.00158625	5
G7530_P1D03-SC_37C	G7530_P1D03	7530	P1D03	P1_SC_37C	SC_37C	AAAAGCGACATTTCT	-0.0173694	0.00258495	8	0.000316405	0.0012252	-0.0616103	0.0442408	-0.0240845	0.00551528	3	-0.016897	0.00146284	5
G7530_P1D03-SC_37C	G7530_P1D03	7530	P1D03	P1_SC_37C	SC_37C	ACAACCTACCTGCTA	0.00111494	0.00135013	10	0.140979	0.200432	-0.00161883	0.00273377	0.00229829	0.00207628	5	0.000285152	0.00173864	5
G7530_P1D03-SC_37C	G7530_P1D03	7530	P1D03	P1_SC_37C	SC_37C	ACAAGTTTTACAGTT	-0.0189194	0.00463598	10	0.0037848	0.00956915	0.021037	-0.0399564	-0.0152483	0.00246766	5	-0.03454	0.00509018	5
G7530_P1D03-SC_37C	G7530_P1D03	7530	P1D03	P1_SC_37C	SC_37C	ACAGGGCAGCTCCCG	-0.0357619	0.00567749	9	0.00358612	0.00914292	-0.0292694	-0.00649253	-0.0349809	0.0028081	4	-0.0447283	0.00951448	5
G7530_P1D03-SC_37C	G7530_P1D03	7530	P1D03	P1_SC_37C	SC_37C	ACAGTTGACGGACAG	0.0058131	0.00228671	10	0.114753	0.168432	0.00149213	0.00432097	-0.00195935	0.00205019	5	0.00881578	0.0012743	5
G7530_P1D03-SC_37C	G7530_P1D03	7530	P1D03	P1_SC_37C	SC_37C	ACCACCGGTCCTGCC	-0.0085934	0.00205587	9	0.000318483	0.00123209	-0.00133408	-0.00725932	-0.0133639	0.00265146	4	-0.00586505	0.00200519	5
G7530_P1D03-SC_37C	G7530_P1D03	7530	P1D03	P1_SC_37C	SC_37C	AGAACATCATCTACA	-0.217102	0.0187601	7	0.00238888	0.00650313			-0.217216	0.00586616	2	-0.214656	0.0270853	5
G7530_P1D03-SC_37C	G7530_P1D03	7530	P1D03	P1_SC_37C	SC_37C	AGAAGACGACGATGA	-0.0564657	0.00562708	10	1.13453e-06	1.37213e-05	-0.0269064	-0.0295593	-0.0489683	0.00295305	5	-0.0761141	0.00478056	5
G7530_P1D03-SC_37C	G7530_P1D03	7530	P1D03	P1_SC_37C	SC_37C	AGATTCATCCCATGG	-0.00112053	0.00171831	10	0.77015	0.817743	-0.00105522	-6.53127e-05	0.000596932	0.00226379	5	-0.00314808	0.00245968	5
G7530_P1D03-SC_37C	G7530_P1D03	7530	P1D03	P1_SC_37C	SC_37C	AGTGTATGATAATAT	-0.0453915	0.00229237	10	6.2491e-08	1.65981e-06	-0.01028	-0.0351115	-0.0498614	0.0034332	5	-0.0433244	0.00233464	5
G7530_P1D03-SC_37C	G7530_P1D03	7530	P1D03	P1_SC_37C	SC_37C	AGTGTTAATCAGACC	-0.0377681	0.010926	8	0.123377	0.179119	-0.0454435	0.00767536	-0.0321697	0.0108588	3	-0.0499458	0.0160152	5
G7530_P1D03-SC_37C	G7530_P1D03	7530	P1D03	P1_SC_37C	SC_37C	AGTTTATAAAAAATT	0.0354348	0.0032739	10	4.07485e-05	0.000232846	0.0647237	-0.0292889	0.0375965	0.00652338	5	0.0352239	0.00203769	5
G7530_P1D03-SC_37C	G7530_P1D03	7530	P1D03	P1_SC_37C	SC_37C	ATAATTTTCATCCAC	-0.0553033	0.0335532	6	0.006751	0.0156139	-0.0111715	-0.0441318	-0.131615	0.0295559	4	-0.0551345	0.00138988	2
G7530_P1D03-SC_37C	G7530_P1D03	7530	P1D03	P1_SC_37C	SC_37C	ATAGAGCGGCGTTGA	-0.0180426	0.00296935	9	0.00236076	0.00644346	-0.011058	-0.00698459	-0.0152728	0.00237628	4	-0.0249944	0.00376463	5
G7530_P1D03-SC_37C	G7530_P1D03	7530	P1D03	P1_SC_37C	SC_37C	ATAGTCGATTAAGAT	-0.045967	0.010665	7	0.00996528	0.0218475	-0.0514128	0.00544581	-0.0522251	0.0103706	4	-0.0256652	0.0186789	3
G7530_P1D03-SC_37C	G7530_P1D03	7530	P1D03	P1_SC_37C	SC_37C	ATATTGAGTAAGTAC	-0.0707514	0.0255233	8	0.319595	0.397722	0.00108997	-0.0718414	-0.044049	0.0321258	3	-0.101166	0.0342864	5
G7530_P1D03-SC_37C	G7530_P1D03	7530	P1D03	P1_SC_37C	SC_37C	ATCGTTGGCATTTGG	-0.0414537	0.00410852	10	0.00015726	0.00068974	-0.105906	0.0644521	-0.0398977	0.00727309	5	-0.0421009	0.00469094	5
G7530_P1D03-SC_37C	G7530_P1D03	7530	P1D03	P1_SC_37C	SC_37C	ATGAAGTTCATAATG	0.006474	0.00455678	3	0.360714	0.439798	0.0266474	-0.0201734	-0.00261626	0.00227502	1	0.0106104	0.00153464	2
G7530_P1D03-SC_37C	G7530_P1D03	7530	P1D03	P1_SC_37C	SC_37C	ATGGCGATGGTCTTG	-0.0205073	0.00505364	10	0.0257998	0.0480042	-0.00278687	-0.0177205	-0.0203645	0.00762728	5	-0.0206458	0.00750963	5
G7530_P1D03-SC_37C	G7530_P1D03	7530	P1D03	P1_SC_37C	SC_37C	ATTAATACTTTGCAG	-0.253517	0.0200133	3	0.00613755	0.0144065	-0.0590057	-0.194512	-0.253517	0.0200133	3
G7530_P1D03-SC_37C	G7530_P1D03	7530	P1D03	P1_SC_37C	SC_37C	ATTATCAAGTGCCAG	-0.100967	0.00757379	10	1.85868e-05	0.000124081	-0.0673298	-0.0336372	-0.101444	0.0115434	5	-0.100522	0.0111547	5
G7530_P1D03-SC_37C	G7530_P1D03	7530	P1D03	P1_SC_37C	SC_37C	ATTATCATCGCCATC	-0.114463	0.0267194	7	0.0671607	0.107204	-0.0768754	-0.0375878	-0.0845265	0.0290612	3	-0.157854	0.0349873	4
G7530_P1D03-SC_37C	G7530_P1D03	7530	P1D03	P1_SC_37C	SC_37C	CAAGGATCCCCGTAG	-0.00609179	0.00413384	10	0.703948	0.762462	-0.0256483	0.0195565	-0.00232384	0.00826359	5	-0.00635107	0.0021677	5
G7530_P1D03-SC_37C	G7530_P1D03	7530	P1D03	P1_SC_37C	SC_37C	CAAGTTCGGCGAAAT	-0.0114684	0.00571302	7	0.859889	0.890855	-0.00314285	-0.0083256	0.000387624	0.00264335	5	-0.027662	0.00308926	2
G7530_P1D03-SC_37C	G7530_P1D03	7530	P1D03	P1_SC_37C	SC_37C	CAATCTTGAATTGAT	-0.0189144	0.00387353	10	0.0959103	0.145118	0.0141933	-0.0331077	-0.0069458	0.00513343	5	-0.0207897	0.00203201	5
G7530_P1D03-SC_37C	G7530_P1D03	7530	P1D03	P1_SC_37C	SC_37C	CAATTTCAACGTTGT	-0.0824173	0.0167537	9	0.0195103	0.0379915	-0.0641989	-0.0182185	-0.0807616	0.019682	4	-0.0857262	0.0278243	5
G7530_P1D03-SC_37C	G7530_P1D03	7530	P1D03	P1_SC_37C	SC_37C	CATATGCATTCCTTG	-0.00218284	0.00183926	10	0.0271667	0.0500968	-0.00930645	0.00712362	-0.00556125	0.00310926	5	-0.00141173	0.00148545	5
G7530_P1D03-SC_37C	G7530_P1D03	7530	P1D03	P1_SC_37C	SC_37C	CATTGTCGGACGCTT	-0.0727697	0.0192612	5	0.10785	0.159939	0.0853687	-0.158138	-0.0636664	0.0309824	3	-0.0790851	0.0258058	2
G7530_P1D03-SC_37C	G7530_P1D03	7530	P1D03	P1_SC_37C	SC_37C	CATTTATGGCTATCT	-0.0603629	0.00797091	8	0.000922952	0.00296524	-0.0900852	0.0297223	-0.0729551	0.0113601	3	-0.0512082	0.00968621	5
G7530_P1D03-SC_37C	G7530_P1D03	7530	P1D03	P1_SC_37C	SC_37C	CCAACACAGGCTTCG	-0.0322909	0.00600218	10	0.022483	0.0428177	0.00488293	-0.0371738	-0.0230561	0.00989318	5	-0.0359859	0.00625798	5
G7530_P1D03-SC_37C	G7530_P1D03	7530	P1D03	P1_SC_37C	SC_37C	CCAAGACCGTGTAAA	-0.345031	0.0331013	4	0.0184123	0.0362284	-0.232802	-0.112229	-0.352229	0.026054	2	-0.302377	0.0634237	2
G7530_P1D03-SC_37C	G7530_P1D03	7530	P1D03	P1_SC_37C	SC_37C	CCAGGATGTACCGCC	-0.173659	0.00630615	8	1.56788e-06	1.7475e-05	-0.104767	-0.0688926	-0.184574	0.0124819	3	-0.170593	0.00661543	5
G7530_P1D03-SC_37C	G7530_P1D03	7530	P1D03	P1_SC_37C	SC_37C	CCGTTAGTATCGCTA	0.00776582	0.003232	9	0.0644077	0.103446	-0.019524	0.0272898	0.00936575	0.00256126	4	0.00190862	0.00490058	5
G7530_P1D03-SC_37C	G7530_P1D03	7530	P1D03	P1_SC_37C	SC_37C	CGAACAGAAACACAA	-0.0681678	0.0156796	8	0.000387534	0.00145276	-0.0509589	-0.0172089	-0.121183	0.0266662	3	-0.0644823	0.00703087	5
G7530_P1D03-SC_37C	G7530_P1D03	7530	P1D03	P1_SC_37C	SC_37C	CGAATGCCATACAAA	-0.014784	0.00470741	9	0.00813598	0.0183671	-0.0187919	0.00400799	-0.0204888	0.00557214	5	-0.00652689	0.00670369	4
G7530_P1D03-SC_37C	G7530_P1D03	7530	P1D03	P1_SC_37C	SC_37C	CGATGATGATGATGA	-3.23234e-05	0.00309382	10	0.519669	0.596692	-0.00559316	0.00556084	-0.00289116	0.00524133	5	0.00129656	0.00357348	5
G7530_P1D03-SC_37C	G7530_P1D03	7530	P1D03	P1_SC_37C	SC_37C	CGCGATCAATCCTCT	-0.0784637	0.0162557	8	0.0313377	0.056388	-0.0319146	-0.0465491	-0.0799817	0.0232233	3	-0.0768412	0.0240098	5
G7530_P1D03-SC_37C	G7530_P1D03	7530	P1D03	P1_SC_37C	SC_37C	CTAAGCAGTCTTCTC	-0.107167	0.00420906	10	1.33888e-07	2.75738e-06	-0.133331	0.0261631	-0.104653	0.00750165	5	-0.108119	0.0046146	5
G7530_P1D03-SC_37C	G7530_P1D03	7530	P1D03	P1_SC_37C	SC_37C	CTACTTACAACGGAA	0.00847954	0.00267464	10	3.25224e-05	0.000193935	2.16745e-05	0.00845787	0.01708	0.00301946	5	0.00596969	0.00163114	5
G7530_P1D03-SC_37C	G7530_P1D03	7530	P1D03	P1_SC_37C	SC_37C	CTAGTTGTATAGCCA	-0.0173499	0.0124877	9	0.0451944	0.0767221	-0.0228617	0.00551181	-0.0425717	0.0242939	4	-0.0140683	0.00876294	5
G7530_P1D03-SC_37C	G7530_P1D03	7530	P1D03	P1_SC_37C	SC_37C	CTATCAAGGCTTAAT	-0.0245969	0.0108137	10	0.0137477	0.028377	0.0109081	-0.035505	-0.0452805	0.0198856	5	-0.023388	0.00480739	5
G7530_P1D03-SC_37C	G7530_P1D03	7530	P1D03	P1_SC_37C	SC_37C	CTCGCTAATACTCCT	-0.0262604	0.00466713	10	5.05414e-08	1.43126e-06	-0.0375804	0.0113199	-0.0430155	0.00300924	5	-0.0186866	0.00202322	5
G7530_P1D03-SC_37C	G7530_P1D03	7530	P1D03	P1_SC_37C	SC_37C	CTCTTGAGAATACTT	-0.0981457	0.00531897	10	1.29356e-06	1.51304e-05	-0.0948968	-0.00324892	-0.0999925	0.007685	5	-0.0960822	0.00812333	5
G7530_P1D03-SC_37C	G7530_P1D03	7530	P1D03	P1_SC_37C	SC_37C	CTGATTTGTGCTGTC	-0.0111899	0.0136275	9	0.0857437	0.132227	0.0375917	-0.0487816	-0.0346882	0.0225339	5	-0.00948086	0.00607708	4
G7530_P1D03-SC_37C	G7530_P1D03	7530	P1D03	P1_SC_37C	SC_37C	CTTGATCAATCAAAA	-0.110942	0.00447252	10	2.54291e-08	8.87311e-07	-0.0824445	-0.0284976	-0.0999799	0.00541064	5	-0.117846	0.00429377	5
G7530_P1D03-SC_37C	G7530_P1D03	7530	P1D03	P1_SC_37C	SC_37C	CTTGCAAGTGTAATT	0.00265013	0.00226711	10	0.919473	0.938226	0.000560442	0.00208969	0.000310452	0.00375965	5	0.00380022	0.00263594	5
G7530_P1D03-SC_37C	G7530_P1D03	7530	P1D03	P1_SC_37C	SC_37C	CTTTCTTGTGTATTT	-0.0435685	0.0176381	10	0.000211347	0.000878424	-0.0498822	0.00631362	-0.102784	0.022273	5	-0.0406164	0.00497316	5
G7530_P1D03-SC_37C	G7530_P1D03	7530	P1D03	P1_SC_37C	SC_37C	GAACTCAGGTTCCAT	-0.0328844	0.00293095	9	0.000157305	0.00068974	-0.0442945	0.0114101	-0.0254415	0.00540341	4	-0.0333218	0.00130997	5
G7530_P1D03-SC_37C	G7530_P1D03	7530	P1D03	P1_SC_37C	SC_37C	GAGAATGAAGGACAG	-0.0645108	0.00576185	10	1.36411e-05	9.70459e-05	0.00446468	-0.0689755	-0.051137	0.00565476	5	-0.0774008	0.00555155	5
G7530_P1D03-SC_37C	G7530_P1D03	7530	P1D03	P1_SC_37C	SC_37C	GAGTGCTTCAAAGTT	0.00127652	0.00286839	10	0.00434765	0.0107458	0.0186933	-0.0174168	0.010045	0.00365374	5	-0.000747648	0.00175549	5
G7530_P1D03-SC_37C	G7530_P1D03	7530	P1D03	P1_SC_37C	SC_37C	GCAAGAAAGAAACCC	-0.0453604	0.00741879	3	0.0246388	0.0461819	-0.0257965	-0.019564	-0.0453604	0.00741879	3
G7530_P1D03-SC_37C	G7530_P1D03	7530	P1D03	P1_SC_37C	SC_37C	GCCCTCGAAACCTAT	-0.118181	0.0156411	7	0.029595	0.0537647	-0.0598668	-0.0583143	-0.074993	0.0329665	2	-0.126206	0.0142102	5
G7530_P1D03-SC_37C	G7530_P1D03	7530	P1D03	P1_SC_37C	SC_37C	GCTGCTTATGAGGAT	-0.0052367	0.00167344	10	0.0016597	0.00481819	-0.0056472	0.000410505	-0.00771844	0.00206625	5	-0.00254368	0.0021524	5
G7530_P1D03-SC_37C	G7530_P1D03	7530	P1D03	P1_SC_37C	SC_37C	GGTGGAAGTAGCAGT	0.00612917	0.00663646	6	0.535581	0.611188	0.00243518	0.00369399	-0.00479588	0.0081624	4	0.00895107	0.00414836	2
G7530_P1D03-SC_37C	G7530_P1D03	7530	P1D03	P1_SC_37C	SC_37C	GGTTGCCCAGAAGTA	-0.00999049	0.00655114	9	0.00580208	0.0137199	-0.0194968	0.00950633	-0.0290962	0.0106025	4	-0.0078866	0.00351833	5
G7530_P1D03-SC_37C	G7530_P1D03	7530	P1D03	P1_SC_37C	SC_37C	GTAATCTGACTCTAG	-0.0445353	0.0052123	10	8.34511e-08	1.95404e-06	0.0077402	-0.0522755	-0.0561245	0.00304554	5	-0.0282813	0.00360677	5
G7530_P1D03-SC_37C	G7530_P1D03	7530	P1D03	P1_SC_37C	SC_37C	GTACAAGAAATTTTG	-0.0412071	0.00625665	8	2.9519e-05	0.000179385	-0.0434344	0.00222724	-0.0470184	0.00294056	4	-0.0212612	0.00544781	4
G7530_P1D03-SC_37C	G7530_P1D03	7530	P1D03	P1_SC_37C	SC_37C	GTCACCGGCACTAAC	-0.0145634	0.00350547	9	0.0114775	0.0245156	-0.0259069	0.0113435	-0.0164729	0.00318025	4	-0.00904095	0.00540845	5
G7530_P1D03-SC_37C	G7530_P1D03	7530	P1D03	P1_SC_37C	SC_37C	GTGTGATTACTAAAT	-0.0400334	0.00738629	8	0.0147238	0.0300926	-0.0108598	-0.0291736	-0.032811	0.00597566	3	-0.0552881	0.00868458	5
G7530_P1D03-SC_37C	G7530_P1D03	7530	P1D03	P1_SC_37C	SC_37C	GTTAAATCAACAGTT	-0.00968363	0.00235571	10	0.00631718	0.0147669	-0.0412742	0.0315905	-0.01151	0.00344838	5	-0.00796882	0.0033414	5
G7530_P1D03-SC_37C	G7530_P1D03	7530	P1D03	P1_SC_37C	SC_37C	GTTCAGCTTTGATCG	-0.375664	0.0351944	7	0.000250755	0.00100861	-0.124119	-0.251545	-0.286208	0.038411	4	-0.391446	0.0161336	3
G7530_P1D03-SC_37C	G7530_P1D03	7530	P1D03	P1_SC_37C	SC_37C	GTTGAACTGGTTGTT	-0.00652951	0.00322655	10	0.928066	0.945137	-0.0331275	0.026598	-0.000205032	0.00227179	5	-0.0162122	0.00281095	5
G7530_P1D03-SC_37C	G7530_P1D03	7530	P1D03	P1_SC_37C	SC_37C	GTTGGGCGCTTAAAG	-0.00226977	0.00144187	10	0.0536883	0.0886527	-0.00339134	0.00112157	-0.00335317	0.0016699	5	-0.000331903	0.00223335	5
G7530_P1D03-SC_37C	G7530_P1D03	7530	P1D03	P1_SC_37C	SC_37C	GTTTAGCTTCCGTTG	-0.0623526	0.00909051	9	0.000184579	0.000785619	0.000432998	-0.0627856	-0.0744583	0.00807753	4	-0.041037	0.0107184	5
G7530_P1D03-SC_37C	G7530_P1D03	7530	P1D03	P1_SC_37C	SC_37C	GTTTGTTTTGGGAAA	-0.188869	0.0215387	9	6.55199e-05	0.000340786	-0.140287	-0.0485813	-0.216125	0.0247036	5	-0.148302	0.0301381	4
G7530_P1D03-SC_37C	G7530_P1D03	7530	P1D03	P1_SC_37C	SC_37C	TAACCTCGCGCTGAG	-0.00980386	0.00300385	10	0.00883051	0.0196889	0.0247705	-0.0345743	-0.0137238	0.00475326	5	-0.00761379	0.0035529	5
G7530_P1D03-SC_37C	G7530_P1D03	7530	P1D03	P1_SC_37C	SC_37C	TAATATTGTTTTGCG	-0.274757	0.0732781	4	0.00147902	0.00437524	-0.0703753	-0.204382	-0.348042	0.0134893	3	-0.057417	0.0232302	1
G7530_P1D03-SC_37C	G7530_P1D03	7530	P1D03	P1_SC_37C	SC_37C	TACACCAATTACACT	-0.185684	0.0721222	3	0.621758	0.690738			-0.0637623	0.0943957	1	-0.246641	0.0667461	2
G7530_P1D03-SC_37C	G7530_P1D03	7530	P1D03	P1_SC_37C	SC_37C	TAGACGGACATCTTC	-0.000511746	0.00938706	5	0.557354	0.63137	0.0214085	-0.0219203	0.010411	0.0231954	2	-0.00198447	0.00851719	3
G7530_P1D03-SC_37C	G7530_P1D03	7530	P1D03	P1_SC_37C	SC_37C	TATATTGAACTTTAC	0.00719934	0.00175814	10	0.000119672	0.000551724	0.0115448	-0.00434551	0.0106304	0.00204408	5	0.00400475	0.00197237	5
G7530_P1D03-SC_37C	G7530_P1D03	7530	P1D03	P1_SC_37C	SC_37C	TATGCCCTTCTTCTG	-0.00400076	0.00151118	10	0.197226	0.265521	0.00616433	-0.0101651	-0.00237618	0.002436	5	-0.00486309	0.00177478	5
G7530_P1D03-SC_37C	G7530_P1D03	7530	P1D03	P1_SC_37C	SC_37C	TCAAAACGGAGTGTT	-0.00354261	0.00151041	10	0.0142929	0.029337	-0.00120033	-0.00234229	-0.00511667	0.00213115	5	-0.00207917	0.00205491	5
G7530_P1D03-SC_37C	G7530_P1D03	7530	P1D03	P1_SC_37C	SC_37C	TCAAAGCATGAAAAA	-0.0742097	0.00534437	10	4.27642e-09	2.63719e-07	-0.086374	0.0121643	-0.0917518	0.00417214	5	-0.0643908	0.00312141	5
G7530_P1D03-SC_37C	G7530_P1D03	7530	P1D03	P1_SC_37C	SC_37C	TCAAATGATGAGGAT	-0.0285935	0.00242253	10	3.41396e-05	0.000201649	0.0191963	-0.0477898	-0.0239762	0.00389452	5	-0.0301121	0.00223351	5
G7530_P1D03-SC_37C	G7530_P1D03	7530	P1D03	P1_SC_37C	SC_37C	TCAACAACCTATGCA	-0.00972078	0.00203594	10	0.0201762	0.0390777	0.0238632	-0.033584	-0.00757067	0.00373883	5	-0.0101998	0.00176467	5
G7530_P1D03-SC_37C	G7530_P1D03	7530	P1D03	P1_SC_37C	SC_37C	TCATAGGTATCTCGC	0.00330012	0.00156937	10	0.728052	0.782582	-0.00351693	0.00681705	0.000506342	0.00198277	5	0.0057141	0.00184307	5
G7530_P1D03-SC_37C	G7530_P1D03	7530	P1D03	P1_SC_37C	SC_37C	TCGATAGAATTTACT	0.0098921	0.00728851	10	0.00130949	0.00396895	-0.0242833	0.0341754	-0.0186737	0.00554624	5	0.0122559	0.00159543	5
G7530_P1D03-SC_37C	G7530_P1D03	7530	P1D03	P1_SC_37C	SC_37C	TCTTGGAGGTGAATG	-0.0138143	0.00932711	10	1.2619e-07	2.62868e-06	-0.0830805	0.0692662	-0.0519943	0.00437162	5	-0.00921478	0.00151734	5
G7530_P1D03-SC_37C	G7530_P1D03	7530	P1D03	P1_SC_37C	SC_37C	TGATCATCACGGGAC	-0.0332556	0.00751767	10	0.101343	0.151734	-0.0208832	-0.0123724	-0.0182387	0.0139593	5	-0.0334654	0.00164982	5
G7530_P1D03-SC_37C	G7530_P1D03	7530	P1D03	P1_SC_37C	SC_37C	TGGAGTCTTTGTTGA	-0.0229169	0.00868084	10	1.70581e-07	3.26409e-06	-0.063193	0.0402762	-0.0574087	0.00471861	5	-0.0153786	0.00220593	5
G7530_P1D03-SC_37C	G7530_P1D03	7530	P1D03	P1_SC_37C	SC_37C	TTAATTAGAGGTATG	-0.0261722	0.00256131	10	7.9194e-06	6.29559e-05	-0.0312409	0.00506875	-0.0285383	0.00236867	5	-0.020372	0.00370859	5
G7530_P1D03-SC_37C	G7530_P1D03	7530	P1D03	P1_SC_37C	SC_37C	TTAGTCTTTCCATCA	-0.413834	0.0661326	9	7.92491e-08	1.89345e-06	-0.204752	-0.209081	-0.163825	0.00953599	5	-0.425075	0.00202207	4
G7530_P1D03-SC_37C	G7530_P1D03	7530	P1D03	P1_SC_37C	SC_37C	TTATATTTATTTGCT	-0.0024012	0.0048676	10	0.0152003	0.0309344	-0.0146704	0.0122692	-0.0161768	0.00744964	5	-0.00161198	0.00178312	5
G7530_P1D03-SC_37C	G7530_P1D03	7530	P1D03	P1_SC_37C	SC_37C	TTTAACTCACCGTAA	-0.0152986	0.00989103	10	0.00017151	0.000740534	-0.0171085	0.00180986	-0.0506742	0.0103751	5	-0.0106776	0.00374981	5
G7530_P1D03-SC_37C	G7530_P1D03	7530	P1D03	P1_SC_37C	SC_37C	TTTATAAATCAATAG	-0.00340143	0.00164205	10	2.23328e-05	0.000143698	0.00352976	-0.00693119	-0.00756167	0.00165481	5	-0.000177125	0.00145683	5
G7530_P1D03-SC_37C	G7530_P1D03	7530	P1D03	P1_SC_37C	SC_37C	TTTTGCATTTAGGCG	-0.117208	0.00403255	10	5.15138e-09	2.96671e-07	-0.0117231	-0.105485	-0.119377	0.00282432	5	-0.106991	0.00613044	5
G7530_P1D03-SC_37C	G7530_P1D03	7530	P1D03	P1_SC_37C	SC_37C	AATGATACCATTTTT	-0.123147	0.0414093	5	0.0409516	0.0705287						-0.123147	0.0414093	5
G7530_P1D03-SC_37C	G7530_P1D03	7530	P1D03	P1_SC_37C	SC_37C	CATCAATGAGGCAGT	-0.276161	0.0195324	5	0.000144544	0.000646298	-0.170366	-0.105795				-0.276161	0.0195324	5
G7530_P1D03-SC_37C	G7530_P1D03	7530	P1D03	P1_SC_37C	SC_37C	TCGAAAGCACAGTAG	-0.170638	0.048096	5	0.0238285	0.0449062	-0.135006	-0.0356314				-0.170638	0.048096	5
G7530_P1D03-SC_37C	G7530_P1D03	7530	P1D03	P1_SC_37C	SC_37C	TTAATTGCACTTATG	-0.0823953	0.0467106	3	0.219722	0.290965	-0.072662	-0.00973331				-0.0823953	0.0467106	3
G2640_P1G04-SC_37C	G2640_P1G04	2640	P1G04	P1_SC_37C	SC_37C	AAAACATTATCAAAG	-0.00221142	0.00118596	10	0.182168	0.248714	-0.000652642	-0.00155878	-0.00226055	0.00182672	5	-0.00216998	0.00167773	5
G2640_P1G04-SC_37C	G2640_P1G04	2640	P1G04	P1_SC_37C	SC_37C	AAAAGAAAAATGTAT	0.0167052	0.000838338	10	5.6467e-08	1.53248e-06	0.0418506	-0.0251453	0.0170739	0.00145961	5	0.0165639	0.000903702	5
G2640_P1G04-SC_37C	G2640_P1G04	2640	P1G04	P1_SC_37C	SC_37C	AAAAGCGACATTTCT	-0.0146503	0.00363041	10	0.0247507	0.0463361	-0.0616103	0.04696	-0.0147173	0.00144348	5	-0.0128409	0.00749865	5
G2640_P1G04-SC_37C	G2640_P1G04	2640	P1G04	P1_SC_37C	SC_37C	ACAACCTACCTGCTA	-0.00110163	0.000858864	10	0.276852	0.353251	-0.00161883	0.000517208	-0.00110076	0.00150214	5	-0.00110196	0.000941517	5
G2640_P1G04-SC_37C	G2640_P1G04	2640	P1G04	P1_SC_37C	SC_37C	ACAAGTTTTACAGTT	-0.0312565	0.00412683	10	2.51647e-06	2.526e-05	0.021037	-0.0522935	-0.0448149	0.00543153	5	-0.0308176	0.000977236	5
G2640_P1G04-SC_37C	G2640_P1G04	2640	P1G04	P1_SC_37C	SC_37C	ACAGGGCAGCTCCCG	-0.0161561	0.00246999	10	0.00262481	0.0070211	-0.0292694	0.0131133	-0.0154285	0.00484453	5	-0.0162699	0.00191628	5
G2640_P1G04-SC_37C	G2640_P1G04	2640	P1G04	P1_SC_37C	SC_37C	ACAGTTGACGGACAG	-0.00583701	0.000980963	10	0.00156413	0.00457919	0.00149213	-0.00732914	-0.00389453	0.00126878	5	-0.00720438	0.00106452	5
G2640_P1G04-SC_37C	G2640_P1G04	2640	P1G04	P1_SC_37C	SC_37C	ACCACCGGTCCTGCC	-0.00875239	0.00122836	10	0.00135147	0.00406844	-0.00133408	-0.00741831	-0.00732233	0.00205938	5	-0.00934982	0.00133107	5
G2640_P1G04-SC_37C	G2640_P1G04	2640	P1G04	P1_SC_37C	SC_37C	AGAACATCATCTACA	-0.109637	0.0108809	10	3.45022e-05	0.000203404			-0.0820733	0.0103019	5	-0.133644	0.00961446	5
G2640_P1G04-SC_37C	G2640_P1G04	2640	P1G04	P1_SC_37C	SC_37C	AGAAGACGACGATGA	-0.0559662	0.00203328	10	2.01962e-08	7.60074e-07	-0.0269064	-0.0290598	-0.0535437	0.00228097	5	-0.0597628	0.0028555	5
G2640_P1G04-SC_37C	G2640_P1G04	2640	P1G04	P1_SC_37C	SC_37C	AGATTCATCCCATGG	-0.00102175	0.00117736	10	0.925147	0.943245	-0.00105522	3.34717e-05	0.000136597	0.00160043	5	-0.00227521	0.00166484	5
G2640_P1G04-SC_37C	G2640_P1G04	2640	P1G04	P1_SC_37C	SC_37C	AGTGTATGATAATAT	-0.0469444	0.00386039	10	5.70123e-10	7.44571e-08	-0.01028	-0.0366644	-0.0595215	0.0020779	5	-0.0380102	0.00175131	5
G2640_P1G04-SC_37C	G2640_P1G04	2640	P1G04	P1_SC_37C	SC_37C	AGTGTTAATCAGACC	-0.0172687	0.00190671	8	0.000584177	0.00204126	-0.0454435	0.0281748	-0.0154661	0.0027978	5	-0.0182985	0.00211472	3
G2640_P1G04-SC_37C	G2640_P1G04	2640	P1G04	P1_SC_37C	SC_37C	AGTTTATAAAAAATT	0.0268923	0.00213528	10	1.48943e-05	0.000103943	0.0647237	-0.0378314	0.0212161	0.00309471	5	0.0282318	0.0015034	5
G2640_P1G04-SC_37C	G2640_P1G04	2640	P1G04	P1_SC_37C	SC_37C	ATAGAGCGGCGTTGA	-0.00665751	0.0012056	10	0.00660175	0.0153305	-0.011058	0.00440052	-0.00557242	0.00221618	5	-0.0069099	0.00106882	5
G2640_P1G04-SC_37C	G2640_P1G04	2640	P1G04	P1_SC_37C	SC_37C	ATAGTCGATTAAGAT	-0.0017533	0.0221175	5	0.961486	0.970445	-0.0514128	0.0496595	-0.00126635	0.00248997	2	-0.0474892	0.0241313	3
G2640_P1G04-SC_37C	G2640_P1G04	2640	P1G04	P1_SC_37C	SC_37C	ATATTGAGTAAGTAC	0.000338313	0.00199228	9	0.77027	0.817801	0.00108997	-0.000751654	-0.000815642	0.00318734	5	0.00101656	0.00244358	4
G2640_P1G04-SC_37C	G2640_P1G04	2640	P1G04	P1_SC_37C	SC_37C	ATCGTTGGCATTTGG	-0.0536523	0.00260805	10	6.00118e-09	3.25029e-07	-0.105906	0.0522535	-0.0444691	0.0023931	5	-0.0564106	0.00131154	5
G2640_P1G04-SC_37C	G2640_P1G04	2640	P1G04	P1_SC_37C	SC_37C	ATGAAGTTCATAATG	0.00845313	0.00404608	4	0.289244	0.366394	0.0266474	-0.0181942	0.00805036	0.00569819	3	0.0096422	0.00979058	1
G2640_P1G04-SC_37C	G2640_P1G04	2640	P1G04	P1_SC_37C	SC_37C	ATGGCGATGGTCTTG	-0.00128239	0.00132982	8	0.935054	0.951398	-0.00278687	0.00150448	-0.00012042	0.00160081	5	-0.00335263	0.00213674	3
G2640_P1G04-SC_37C	G2640_P1G04	2640	P1G04	P1_SC_37C	SC_37C	ATTAATACTTTGCAG	-0.0750868	0.0199309	5	0.103867	0.154917	-0.0590057	-0.0160812	-0.0765005	0.0084323	2	-0.0537689	0.0327457	3
G2640_P1G04-SC_37C	G2640_P1G04	2640	P1G04	P1_SC_37C	SC_37C	ATTATCAAGTGCCAG	-0.0733036	0.00361708	10	8.64598e-07	1.12308e-05	-0.0673298	-0.00597375	-0.0689643	0.00633988	5	-0.0747375	0.00364453	5
G2640_P1G04-SC_37C	G2640_P1G04	2640	P1G04	P1_SC_37C	SC_37C	CAAGGATCCCCGTAG	-0.00449337	0.00107963	9	0.000408086	0.00151251	-0.0256483	0.0211549	-0.00645462	0.0015225	5	-0.00359896	0.00102816	4
G2640_P1G04-SC_37C	G2640_P1G04	2640	P1G04	P1_SC_37C	SC_37C	CAAGTTCGGCGAAAT	-0.00207579	0.00205818	8	0.450964	0.530568	-0.00314285	0.00106706	-0.00230553	0.00126403	4	0.000243083	0.00401587	4
G2640_P1G04-SC_37C	G2640_P1G04	2640	P1G04	P1_SC_37C	SC_37C	CAATCTTGAATTGAT	0.00178907	0.00132311	10	0.0988571	0.148799	0.0141933	-0.0124042	0.00317873	0.00230636	5	0.00130803	0.00135695	5
G2640_P1G04-SC_37C	G2640_P1G04	2640	P1G04	P1_SC_37C	SC_37C	CAATTTCAACGTTGT	-0.0423768	0.00356479	10	1.27011e-05	9.20554e-05	-0.0641989	0.0218221	-0.0353469	0.00371374	5	-0.0502361	0.00392674	5
G2640_P1G04-SC_37C	G2640_P1G04	2640	P1G04	P1_SC_37C	SC_37C	CATATGCATTCCTTG	0.000952429	0.00167296	10	0.00592417	0.0139741	-0.00930645	0.0102589	0.00488845	0.00156178	5	-0.00290319	0.00154574	5
G2640_P1G04-SC_37C	G2640_P1G04	2640	P1G04	P1_SC_37C	SC_37C	CATCAATGAGGCAGT	-0.107889	0.00772411	10	3.82042e-06	3.52526e-05	-0.170366	0.0624774	-0.100443	0.00681017	5	-0.126854	0.0108694	5
G2640_P1G04-SC_37C	G2640_P1G04	2640	P1G04	P1_SC_37C	SC_37C	CATTGTCGGACGCTT	-0.0277499	0.00246332	4	0.0106433	0.0230475	0.0853687	-0.113119	-0.0262681	0.00286214	3	-0.0319146	0.00479824	1
G2640_P1G04-SC_37C	G2640_P1G04	2640	P1G04	P1_SC_37C	SC_37C	CATTTATGGCTATCT	-0.0843938	0.00508716	10	3.45165e-07	5.53763e-06	-0.0900852	0.00569144	-0.0733756	0.00475277	5	-0.0967305	0.00502914	5
G2640_P1G04-SC_37C	G2640_P1G04	2640	P1G04	P1_SC_37C	SC_37C	CCAACACAGGCTTCG	-0.0573178	0.00325007	10	2.24441e-06	2.31829e-05	0.00488293	-0.0622007	-0.0571443	0.0033057	5	-0.0578946	0.00602812	5
G2640_P1G04-SC_37C	G2640_P1G04	2640	P1G04	P1_SC_37C	SC_37C	CCAAGACCGTGTAAA	-0.215549	0.0246233	4	0.0180301	0.0356169	-0.232802	0.0172534	-0.273613	0.037255	1	-0.196178	0.0215183	3
G2640_P1G04-SC_37C	G2640_P1G04	2640	P1G04	P1_SC_37C	SC_37C	CCAGGATGTACCGCC	-0.050006	0.0024942	10	7.8534e-07	1.03964e-05	-0.104767	0.0547606	-0.0493988	0.00315602	5	-0.0510717	0.00418111	5
G2640_P1G04-SC_37C	G2640_P1G04	2640	P1G04	P1_SC_37C	SC_37C	CCGTTAGTATCGCTA	-0.00723953	0.00200158	7	0.100579	0.150803	-0.019524	0.0122844	-0.00526744	0.00329444	4	-0.0078329	0.0018071	3
G2640_P1G04-SC_37C	G2640_P1G04	2640	P1G04	P1_SC_37C	SC_37C	CGAATGCCATACAAA	0.00120287	0.00511636	9	0.689466	0.750627	-0.0187919	0.0199948	0.00219869	0.00223992	5	-0.0136308	0.00864508	4
G2640_P1G04-SC_37C	G2640_P1G04	2640	P1G04	P1_SC_37C	SC_37C	CGATGATGATGATGA	-0.0017682	0.00146604	10	0.973986	0.979569	-0.00559316	0.00382496	-4.96465e-05	0.00137413	5	-0.00525433	0.00195712	5
G2640_P1G04-SC_37C	G2640_P1G04	2640	P1G04	P1_SC_37C	SC_37C	CGCGATCAATCCTCT	-0.0386554	0.00900779	7	0.0133926	0.027754	-0.0319146	-0.00674073	-0.0587824	0.0190984	2	-0.0338236	0.00935746	5
G2640_P1G04-SC_37C	G2640_P1G04	2640	P1G04	P1_SC_37C	SC_37C	CTAAGCAGTCTTCTC	-0.0638554	0.00152246	10	1.194e-09	1.22606e-07	-0.133331	0.0694752	-0.0648056	0.00253859	5	-0.0633368	0.00187525	5
G2640_P1G04-SC_37C	G2640_P1G04	2640	P1G04	P1_SC_37C	SC_37C	CTAAGTGTGAAGGAG	-0.0595422	0.00828678	6	0.00397973	0.00998902	-0.131283	0.0717412	-0.0902177	0.0151622	1	-0.0533419	0.00681666	5
G2640_P1G04-SC_37C	G2640_P1G04	2640	P1G04	P1_SC_37C	SC_37C	CTACTTACAACGGAA	0.00975739	0.00101915	10	1.56573e-05	0.000107938	2.16745e-05	0.00973571	0.0103895	0.00110338	5	0.00835972	0.00164065	5
G2640_P1G04-SC_37C	G2640_P1G04	2640	P1G04	P1_SC_37C	SC_37C	CTAGTTGTATAGCCA	-0.0506761	0.0153791	3	0.112849	0.166008	-0.0228617	-0.0278144	-0.0356582	0.0064447	2	-0.0804142	0.0090689	1
G2640_P1G04-SC_37C	G2640_P1G04	2640	P1G04	P1_SC_37C	SC_37C	CTATCAAGGCTTAAT	-0.00289582	0.00426474	10	0.906736	0.927814	0.0109081	-0.0138039	-0.000518023	0.00242694	5	-0.0158862	0.00567261	5
G2640_P1G04-SC_37C	G2640_P1G04	2640	P1G04	P1_SC_37C	SC_37C	CTCGCTAATACTCCT	-0.0109263	0.0009793	10	2.54763e-06	2.55119e-05	-0.0375804	0.0266541	-0.0123274	0.00159999	5	-0.0103726	0.00100583	5
G2640_P1G04-SC_37C	G2640_P1G04	2640	P1G04	P1_SC_37C	SC_37C	CTCTTGAGAATACTT	-0.0467338	0.00568765	10	8.33616e-05	0.00041721	-0.0948968	0.048163	-0.0434079	0.00344712	5	-0.0635476	0.00775057	5
G2640_P1G04-SC_37C	G2640_P1G04	2640	P1G04	P1_SC_37C	SC_37C	CTGATTTGTGCTGTC	0.00554184	0.0105369	5	0.747077	0.797901	0.0375917	-0.0320499	-0.00634255	0.0310725	2	0.00555308	0.000955301	3
G2640_P1G04-SC_37C	G2640_P1G04	2640	P1G04	P1_SC_37C	SC_37C	CTTGATCAATCAAAA	-0.142574	0.00795351	10	5.00237e-09	2.9119e-07	-0.0824445	-0.0601296	-0.151105	0.00399106	5	-0.114443	0.00724727	5
G2640_P1G04-SC_37C	G2640_P1G04	2640	P1G04	P1_SC_37C	SC_37C	CTTGCAAGTGTAATT	0.00433825	0.00235927	9	0.0688919	0.109714	0.000560442	0.00377781	0.00535446	0.00160491	5	-0.00185304	0.00396139	4
G2640_P1G04-SC_37C	G2640_P1G04	2640	P1G04	P1_SC_37C	SC_37C	CTTTCTTGTGTATTT	-0.0497557	0.00694913	4	0.0332496	0.0592802	-0.0498822	0.000126492	-0.0643604	0.0120683	1	-0.0448482	0.00699567	3
G2640_P1G04-SC_37C	G2640_P1G04	2640	P1G04	P1_SC_37C	SC_37C	GAACTCAGGTTCCAT	-0.0415079	0.00256987	9	1.16337e-06	1.3975e-05	-0.0442945	0.00278653	-0.0465441	0.0038739	5	-0.0403649	0.00184559	4
G2640_P1G04-SC_37C	G2640_P1G04	2640	P1G04	P1_SC_37C	SC_37C	GAGAATGAAGGACAG	-0.0413352	0.0017888	10	4.86272e-08	1.39253e-06	0.00446468	-0.0457999	-0.0366366	0.00259955	5	-0.0424658	0.00127515	5
G2640_P1G04-SC_37C	G2640_P1G04	2640	P1G04	P1_SC_37C	SC_37C	GAGTGCTTCAAAGTT	0.00164332	0.00125247	10	0.963988	0.971946	0.0186933	-0.01705	7.28235e-05	0.00232674	5	0.00188625	0.000915105	5
G2640_P1G04-SC_37C	G2640_P1G04	2640	P1G04	P1_SC_37C	SC_37C	GCCCTCGAAACCTAT	-0.0597009	0.00441819	10	1.39723e-05	9.89499e-05	-0.0598668	0.000165928	-0.0510452	0.00607313	5	-0.0653503	0.00490642	5
G2640_P1G04-SC_37C	G2640_P1G04	2640	P1G04	P1_SC_37C	SC_37C	GCTAATTTCAAGAAT	-0.0317601	0.00867896	7	0.129288	0.18619	-0.0633115	0.0315514	-0.0225109	0.0103444	3	-0.0438476	0.0118256	4
G2640_P1G04-SC_37C	G2640_P1G04	2640	P1G04	P1_SC_37C	SC_37C	GCTGCGGAGCCTCAG	-0.118629	0.0620478	4	0.930941	0.947601			-0.0122065	0.124689	1	-0.154106	0.0719922	3
G2640_P1G04-SC_37C	G2640_P1G04	2640	P1G04	P1_SC_37C	SC_37C	GCTGCTTATGAGGAT	-0.0034917	0.00131862	10	0.0373677	0.0653501	-0.0056472	0.0021555	-0.0043471	0.00237319	5	-0.00321619	0.00134685	5
G2640_P1G04-SC_37C	G2640_P1G04	2640	P1G04	P1_SC_37C	SC_37C	GGTGGAAGTAGCAGT	0.00264051	0.00436719	7	0.420657	0.500825	0.00243518	0.000205334	-0.00458302	0.00616586	4	0.00588996	0.00413546	3
G2640_P1G04-SC_37C	G2640_P1G04	2640	P1G04	P1_SC_37C	SC_37C	GGTTGCCCAGAAGTA	-0.00685897	0.0022722	10	0.105437	0.156845	-0.0194968	0.0126378	-0.00366618	0.00174885	5	-0.0135145	0.00252497	5
G2640_P1G04-SC_37C	G2640_P1G04	2640	P1G04	P1_SC_37C	SC_37C	GTAATCTGACTCTAG	-0.0525263	0.0128233	9	0.0455276	0.0772351	0.0077402	-0.0602665	-0.0438515	0.0121165	4	-0.0743598	0.0192225	5
G2640_P1G04-SC_37C	G2640_P1G04	2640	P1G04	P1_SC_37C	SC_37C	GTACAAGAAATTTTG	-0.00778494	0.0030542	8	0.195164	0.26314	-0.0434344	0.0356494	-0.00770574	0.00282111	3	-0.00801992	0.00485916	5
G2640_P1G04-SC_37C	G2640_P1G04	2640	P1G04	P1_SC_37C	SC_37C	GTCACCGGCACTAAC	-0.00302465	0.00165464	10	0.0225873	0.0430006	-0.0259069	0.0228823	-0.00574907	0.00248692	5	-0.00147993	0.00187262	5
G2640_P1G04-SC_37C	G2640_P1G04	2640	P1G04	P1_SC_37C	SC_37C	GTGTGATTACTAAAT	-0.0510754	0.00721242	10	0.000609686	0.00211497	-0.0108598	-0.0402157	-0.0503556	0.00274771	5	-0.0667716	0.0128311	5
G2640_P1G04-SC_37C	G2640_P1G04	2640	P1G04	P1_SC_37C	SC_37C	GTTAAATCAACAGTT	-0.0089797	0.00109722	10	8.06224e-05	0.000405947	-0.0412742	0.0322945	-0.00744003	0.00118317	5	-0.0111986	0.00142039	5
G2640_P1G04-SC_37C	G2640_P1G04	2640	P1G04	P1_SC_37C	SC_37C	GTTCAGCTTTGATCG	-0.120891	0.00925655	10	7.345e-07	9.96696e-06	-0.124119	0.00322841	-0.10839	0.00607398	5	-0.150661	0.00937354	5
G2640_P1G04-SC_37C	G2640_P1G04	2640	P1G04	P1_SC_37C	SC_37C	GTTGAACTGGTTGTT	-0.0476113	0.00353884	9	1.27038e-05	9.20554e-05	-0.0331275	-0.0144838	-0.0463942	0.00265968	5	-0.0551285	0.00661007	4
G2640_P1G04-SC_37C	G2640_P1G04	2640	P1G04	P1_SC_37C	SC_37C	GTTGGGCGCTTAAAG	-8.52636e-05	0.000787703	10	0.852419	0.884406	-0.00339134	0.00330608	-0.000151787	0.000983568	5	2.77777e-05	0.00128214	5
G2640_P1G04-SC_37C	G2640_P1G04	2640	P1G04	P1_SC_37C	SC_37C	GTTTAGCTTCCGTTG	-0.0485679	0.00425621	10	5.84306e-05	0.000311124	0.000432998	-0.0490009	-0.0450881	0.00516872	5	-0.0542408	0.00659954	5
G2640_P1G04-SC_37C	G2640_P1G04	2640	P1G04	P1_SC_37C	SC_37C	GTTTGTTTTGGGAAA	-0.104821	0.022223	9	0.00548327	0.0130803	-0.140287	0.0354662	-0.103145	0.00764103	5	-0.158991	0.0434324	4
G2640_P1G04-SC_37C	G2640_P1G04	2640	P1G04	P1_SC_37C	SC_37C	TAACCTCGCGCTGAG	-0.00131454	0.00125531	10	0.0130104	0.0271703	0.0247705	-0.026085	0.00245081	0.00131279	5	-0.00312394	0.000910041	5
G2640_P1G04-SC_37C	G2640_P1G04	2640	P1G04	P1_SC_37C	SC_37C	TAATATTGTTTTGCG	-0.114637	0.0105918	9	0.000174389	0.000749869	-0.0703753	-0.0442622	-0.115742	0.00539087	4	-0.10158	0.0185313	5
G2640_P1G04-SC_37C	G2640_P1G04	2640	P1G04	P1_SC_37C	SC_37C	TACACCAATTACACT	-0.142485	0.0184827	6	7.83184e-05	0.000396429			-0.159291	0.00967043	5	-0.0589976	0.021554	1
G2640_P1G04-SC_37C	G2640_P1G04	2640	P1G04	P1_SC_37C	SC_37C	TAGACGGACATCTTC	0.00467895	0.00271678	9	0.162468	0.225726	0.0214085	-0.0167296	0.00534071	0.00199634	5	-0.000193426	0.00541696	4
G2640_P1G04-SC_37C	G2640_P1G04	2640	P1G04	P1_SC_37C	SC_37C	TATATTGAACTTTAC	0.00588255	0.00094657	10	2.04967e-05	0.000134383	0.0115448	-0.0056623	0.00714678	0.00105008	5	0.00409768	0.0012477	5
G2640_P1G04-SC_37C	G2640_P1G04	2640	P1G04	P1_SC_37C	SC_37C	TATGCCCTTCTTCTG	-0.0249857	0.00179334	10	5.24643e-06	4.548e-05	0.00616433	-0.03115	-0.0245351	0.0012442	5	-0.028014	0.00322556	5
G2640_P1G04-SC_37C	G2640_P1G04	2640	P1G04	P1_SC_37C	SC_37C	TCAAAACGGAGTGTT	-0.00347349	0.00103849	10	0.00841242	0.0188987	-0.00120033	-0.00227317	-0.0042183	0.00137906	5	-0.00252857	0.00155332	5
G2640_P1G04-SC_37C	G2640_P1G04	2640	P1G04	P1_SC_37C	SC_37C	TCAAAGCATGAAAAA	-0.0691689	0.00311721	10	5.85847e-08	1.58306e-06	-0.086374	0.0172051	-0.059768	0.00426794	5	-0.0705833	0.00165545	5
G2640_P1G04-SC_37C	G2640_P1G04	2640	P1G04	P1_SC_37C	SC_37C	TCAAATGATGAGGAT	-0.0323289	0.0020943	10	1.89704e-06	2.03194e-05	0.0191963	-0.0515253	-0.0349198	0.00374653	5	-0.0316408	0.00193081	5
G2640_P1G04-SC_37C	G2640_P1G04	2640	P1G04	P1_SC_37C	SC_37C	TCAACAACCTATGCA	-0.00128054	0.00147144	10	0.602779	0.673135	0.0238632	-0.0251438	-0.00108927	0.00146094	5	-0.00193615	0.00270473	5
G2640_P1G04-SC_37C	G2640_P1G04	2640	P1G04	P1_SC_37C	SC_37C	TCAGAGCATTGGCCT	-0.139461	0.0196669	7	0.00967817	0.0212817			-0.132446	0.0307213	3	-0.145823	0.0292553	4
G2640_P1G04-SC_37C	G2640_P1G04	2640	P1G04	P1_SC_37C	SC_37C	TCATAGGTATCTCGC	-0.00241363	0.00097027	10	0.0448773	0.0763028	-0.00351693	0.00110331	-0.00274131	0.00165608	5	-0.00226015	0.00113338	5
G2640_P1G04-SC_37C	G2640_P1G04	2640	P1G04	P1_SC_37C	SC_37C	TCGAAAGCACAGTAG	-0.0950934	0.0118776	9	2.45673e-05	0.000155537	-0.135006	0.0399128	-0.124349	0.0157066	5	-0.0878566	0.00781191	4
G2640_P1G04-SC_37C	G2640_P1G04	2640	P1G04	P1_SC_37C	SC_37C	TCGATAGAATTTACT	-0.0378268	0.00322031	10	6.55117e-06	5.41526e-05	-0.0242833	-0.0135436	-0.0266346	0.00358663	5	-0.0393392	0.00131844	5
G2640_P1G04-SC_37C	G2640_P1G04	2640	P1G04	P1_SC_37C	SC_37C	TCTTGGAGGTGAATG	-0.0232374	0.00626311	10	2.87061e-06	2.81347e-05	-0.0830805	0.0598431	-0.0149698	0.00108576	5	-0.0480995	0.00188282	5
G2640_P1G04-SC_37C	G2640_P1G04	2640	P1G04	P1_SC_37C	SC_37C	TGATCATCACGGGAC	-0.0258048	0.00229447	10	1.20091e-05	8.82578e-05	-0.0208832	-0.00492153	-0.0238204	0.00186478	5	-0.031707	0.00321606	5
G2640_P1G04-SC_37C	G2640_P1G04	2640	P1G04	P1_SC_37C	SC_37C	TGGAGTCTTTGTTGA	-0.0291179	0.00243939	10	3.31148e-05	0.000196809	-0.063193	0.0340751	-0.0294251	0.00273423	5	-0.0283391	0.00435316	5
G2640_P1G04-SC_37C	G2640_P1G04	2640	P1G04	P1_SC_37C	SC_37C	TTAATTAGAGGTATG	-0.0245174	0.00214084	10	7.3953e-05	0.000378547	-0.0312409	0.0067235	-0.0217786	0.00405024	5	-0.0248741	0.00146166	5
G2640_P1G04-SC_37C	G2640_P1G04	2640	P1G04	P1_SC_37C	SC_37C	TTAATTGCACTTATG	-0.0176707	0.0050438	7	0.0184226	0.0362371	-0.072662	0.0549913	-0.0132165	0.00308748	4	-0.0327221	0.00567556	3
G2640_P1G04-SC_37C	G2640_P1G04	2640	P1G04	P1_SC_37C	SC_37C	TTAGTCTTTCCATCA	-0.164328	0.00611861	10	7.76729e-08	1.87514e-06	-0.204752	0.0404246	-0.163621	0.00409389	5	-0.170332	0.0119329	5
G2640_P1G04-SC_37C	G2640_P1G04	2640	P1G04	P1_SC_37C	SC_37C	TTATATTTATTTGCT	-0.000982397	0.000964002	10	0.927165	0.944451	-0.0146704	0.013688	9.95142e-05	0.00147471	5	-0.00168592	0.00118919	5
G2640_P1G04-SC_37C	G2640_P1G04	2640	P1G04	P1_SC_37C	SC_37C	TTTAACTCACCGTAA	-0.00465856	0.00178633	10	0.0704958	0.111982	-0.0171085	0.01245	-0.00327244	0.00112936	5	-0.0101048	0.00223863	5
G2640_P1G04-SC_37C	G2640_P1G04	2640	P1G04	P1_SC_37C	SC_37C	TTTATAAATCAATAG	0.00444087	0.000736667	10	5.79219e-06	4.90839e-05	0.00352976	0.000911104	0.00545567	0.00107468	5	0.00378559	0.000863576	5
G2640_P1G04-SC_37C	G2640_P1G04	2640	P1G04	P1_SC_37C	SC_37C	TTTTGCATTTAGGCG	-0.054287	0.00127562	10	9.56936e-10	1.0691e-07	-0.0117231	-0.042564	-0.0534732	0.00201595	5	-0.0548549	0.00168393	5
G2640_P1G04-SC_37C	G2640_P1G04	2640	P1G04	P1_SC_37C	SC_37C	CGAACAGAAACACAA	-0.0659528	0.00765511	4	0.00323657	0.00838384	-0.0509589	-0.0149939				-0.0659528	0.00765511	4
G70_P3G05-SC_37C	G70_P3G05	70	P3G05	P3_SC_37C	SC_37C	AAAACATTATCAAAG	-0.0100163	0.00447889	10	0.584088	0.655612	-0.00194739	-0.00806889	0.00257187	0.00604597	5	-0.013566	0.00321056	5
G70_P3G05-SC_37C	G70_P3G05	70	P3G05	P3_SC_37C	SC_37C	AAAAGAAAAATGTAT	0.0316233	0.00423018	10	1.9382e-05	0.00012829	0.0167521	0.0148712	0.0204824	0.00287513	5	0.0429665	0.00290112	5
G70_P3G05-SC_37C	G70_P3G05	70	P3G05	P3_SC_37C	SC_37C	AAAAGCGACATTTCT	-0.031639	0.00796526	9	6.54464e-05	0.000340545	-0.0396226	0.00798363	-0.0591155	0.0100942	4	-0.0281775	0.0035828	5
G70_P3G05-SC_37C	G70_P3G05	70	P3G05	P3_SC_37C	SC_37C	ACAACCTACCTGCTA	-0.00255595	0.00360667	10	0.932984	0.949602	-0.00239255	-0.000163392	-0.000405665	0.00381421	5	-0.00778211	0.00594632	5
G70_P3G05-SC_37C	G70_P3G05	70	P3G05	P3_SC_37C	SC_37C	ACAAGTTTTACAGTT	0.00419321	0.00312157	10	0.181064	0.247451	-0.0260819	0.0302751	0.00589517	0.00340841	5	0.000243265	0.00519244	5
G70_P3G05-SC_37C	G70_P3G05	70	P3G05	P3_SC_37C	SC_37C	ACAGGGCAGCTCCCG	-0.0431728	0.00321431	10	2.19702e-06	2.2845e-05	-0.0397814	-0.00339143	-0.0360441	0.00364672	5	-0.0491009	0.00332546	5
G70_P3G05-SC_37C	G70_P3G05	70	P3G05	P3_SC_37C	SC_37C	ACAGTTGACGGACAG	-0.00708906	0.0056974	10	0.143495	0.203544	-0.00517114	-0.00191792	0.00447535	0.00284567	5	-0.0261224	0.00365073	5
G70_P3G05-SC_37C	G70_P3G05	70	P3G05	P3_SC_37C	SC_37C	ACCACCGGTCCTGCC	-0.00276829	0.00473939	10	0.549008	0.623882	-0.000431459	-0.00233683	-0.00428105	0.00952615	5	-0.00261647	0.00301786	5
G70_P3G05-SC_37C	G70_P3G05	70	P3G05	P3_SC_37C	SC_37C	AGAACATCATCTACA	-0.224382	0.0233834	10	9.4564e-06	7.27095e-05	-0.223556	-0.000826217	-0.184217	0.0157798	5	-0.297913	0.0213508	5
G70_P3G05-SC_37C	G70_P3G05	70	P3G05	P3_SC_37C	SC_37C	AGAAGACGACGATGA	-0.0381628	0.0129707	10	9.92459e-07	1.23754e-05	-0.0663318	0.028169	-0.0894539	0.00961404	5	-0.0355835	0.00215596	5
G70_P3G05-SC_37C	G70_P3G05	70	P3G05	P3_SC_37C	SC_37C	AGATTCATCCCATGG	0.0800726	0.0146208	10	3.56231e-07	5.68191e-06	0.0346566	0.045416	0.0869885	0.00274568	5	0.0208362	0.00803563	5
G70_P3G05-SC_37C	G70_P3G05	70	P3G05	P3_SC_37C	SC_37C	AGTGTATGATAATAT	-0.00423865	0.00336663	10	6.92867e-06	5.65771e-05	-0.0233157	0.019077	-0.0113152	0.00184692	5	0.00657192	0.00228277	5
G70_P3G05-SC_37C	G70_P3G05	70	P3G05	P3_SC_37C	SC_37C	AGTGTTAATCAGACC	-0.0357683	0.0107428	8	0.222091	0.293724	-0.0221393	-0.013629	-0.0240971	0.0168942	3	-0.0439558	0.01415	5
G70_P3G05-SC_37C	G70_P3G05	70	P3G05	P3_SC_37C	SC_37C	AGTTTATAAAAAATT	0.0526046	0.00843278	9	0.00132021	0.00399365	0.0188846	0.03372	0.0230809	0.00556414	4	0.0664765	0.003814	5
G70_P3G05-SC_37C	G70_P3G05	70	P3G05	P3_SC_37C	SC_37C	ATAATTTTCATCCAC	-0.0415989	0.00487628	4	0.0018531	0.00526914	-0.104223	0.0626243	-0.0355189	0.0022935	3	-0.0535206	0.00321157	1
G70_P3G05-SC_37C	G70_P3G05	70	P3G05	P3_SC_37C	SC_37C	ATAGAGCGGCGTTGA	-0.0119935	0.00440859	8	0.298893	0.376472	-0.0178801	0.00588652	-0.00681407	0.00458511	3	-0.0194271	0.00549296	5
G70_P3G05-SC_37C	G70_P3G05	70	P3G05	P3_SC_37C	SC_37C	ATAGTCGATTAAGAT	-0.0446656	0.0360039	8	0.712966	0.770154	-0.0361705	-0.00849504	-0.0170412	0.0229821	3	-0.128444	0.0400231	5
G70_P3G05-SC_37C	G70_P3G05	70	P3G05	P3_SC_37C	SC_37C	ATATTGAGTAAGTAC	-0.00301553	0.00267097	10	0.37915	0.459174	-0.0106469	0.00763139	-0.00328089	0.00232065	5	-0.00175141	0.00506513	5
G70_P3G05-SC_37C	G70_P3G05	70	P3G05	P3_SC_37C	SC_37C	ATCGTTGGCATTTGG	-0.0478337	0.00688987	6	0.00280553	0.00743584	-0.0437201	-0.00411361	-0.0504481	0.00788655	5	-0.0352368	0.0173116	1
G70_P3G05-SC_37C	G70_P3G05	70	P3G05	P3_SC_37C	SC_37C	ATGAAGTTCATAATG	0.00208871	0.0182305	4	0.994299	0.995515	0.0100138	-0.00792512	8.12296e-05	0.00308325	2	0.0442547	0.0141307	2
G70_P3G05-SC_37C	G70_P3G05	70	P3G05	P3_SC_37C	SC_37C	ATGGCGATGGTCTTG	-0.0093542	0.0145162	9	0.2956	0.373003	-0.007843	-0.0015112	0.0217884	0.0229137	4	-0.0218261	0.0145005	5
G70_P3G05-SC_37C	G70_P3G05	70	P3G05	P3_SC_37C	SC_37C	ATTAATACTTTGCAG	-0.105046	0.0420657	5	0.133788	0.19173	-0.105046	0	-0.0735458	0.0360569	4	-0.230843	0.0720557	1
G70_P3G05-SC_37C	G70_P3G05	70	P3G05	P3_SC_37C	SC_37C	ATTATCAAGTGCCAG	-0.120844	0.0123324	10	0.000115698	0.000537379	-0.104003	-0.0168411	-0.117076	0.00931238	5	-0.141843	0.0219829	5
G70_P3G05-SC_37C	G70_P3G05	70	P3G05	P3_SC_37C	SC_37C	ATTATCATCGCCATC	-0.126869	0.0147024	10	0.00021275	0.000882821	-0.127728	0.000859209	-0.128834	0.00780285	5	-0.102343	0.0275655	5
G70_P3G05-SC_37C	G70_P3G05	70	P3G05	P3_SC_37C	SC_37C	CAAGGATCCCCGTAG	-0.0134855	0.0109693	8	0.256867	0.331825	-0.0174624	0.00397691	-0.0205446	0.0228923	4	-0.0132171	0.00446386	4
G70_P3G05-SC_37C	G70_P3G05	70	P3G05	P3_SC_37C	SC_37C	CAAGTTCGGCGAAAT	-0.00758671	0.00865972	7	0.607324	0.677418	-0.00943237	0.00184566	-0.00675445	0.00885872	4	-0.0113913	0.0189407	3
G70_P3G05-SC_37C	G70_P3G05	70	P3G05	P3_SC_37C	SC_37C	CAATCTTGAATTGAT	0.00692713	0.00287585	9	0.315557	0.393565	-0.000313742	0.00724087	0.0042323	0.00424053	4	0.00928058	0.00396285	5
G70_P3G05-SC_37C	G70_P3G05	70	P3G05	P3_SC_37C	SC_37C	CAATTTCAACGTTGT	-0.0208587	0.0243706	4	0.112538	0.16563	-0.0701227	0.049264	-0.0683808	0.0335709	2	-0.0149432	0.0118443	2
G70_P3G05-SC_37C	G70_P3G05	70	P3G05	P3_SC_37C	SC_37C	CATATGCATTCCTTG	-0.0912808	0.0285474	5	0.032799	0.0585942	-0.00684678	-0.084434	-0.0912808	0.0285474	5
G70_P3G05-SC_37C	G70_P3G05	70	P3G05	P3_SC_37C	SC_37C	CATCAATGAGGCAGT	-0.144386	0.0215713	5	0.00256128	0.0068775	-0.195177	0.0507906	-0.144386	0.0215713	5
G70_P3G05-SC_37C	G70_P3G05	70	P3G05	P3_SC_37C	SC_37C	CATTGTCGGACGCTT	-0.0387553	0.0466963	3	0.169038	0.233538			-0.0836241	0.0228052	2	0.0507623	0.0322119	1
G70_P3G05-SC_37C	G70_P3G05	70	P3G05	P3_SC_37C	SC_37C	CATTTATGGCTATCT	-0.196675	0.0291262	10	2.85403e-05	0.000174618	-0.0957317	-0.100943	-0.217099	0.0150696	5	-0.098761	0.0329954	5
G70_P3G05-SC_37C	G70_P3G05	70	P3G05	P3_SC_37C	SC_37C	CCAACACAGGCTTCG	0.000635644	0.00484871	10	0.00417784	0.0103962	-0.0257215	0.0263571	-0.0151234	0.0051147	5	0.00618309	0.0030346	5
G70_P3G05-SC_37C	G70_P3G05	70	P3G05	P3_SC_37C	SC_37C	CCAAGACCGTGTAAA	-0.156283	0.0120968	7	0.000173498	0.000746558	-0.233836	0.077553	-0.150988	0.0155956	5	-0.166462	0.0216233	2
G70_P3G05-SC_37C	G70_P3G05	70	P3G05	P3_SC_37C	SC_37C	CCAGGATGTACCGCC	-0.0815455	0.022835	8	0.0838608	0.129851	-0.0966343	0.0150888	-0.0639561	0.0252463	4	-0.116803	0.0357437	4
G70_P3G05-SC_37C	G70_P3G05	70	P3G05	P3_SC_37C	SC_37C	CCGTTAGTATCGCTA	0.00878359	0.0110354	10	0.79929	0.842793	-0.00985291	0.0186365	-0.00412375	0.0187342	5	0.0142043	0.0121407	5
G70_P3G05-SC_37C	G70_P3G05	70	P3G05	P3_SC_37C	SC_37C	CGAACAGAAACACAA	-0.0768353	0.00860844	6	0.00268122	0.00715816	-0.0491679	-0.0276675	-0.0666973	0.00920842	3	-0.0916193	0.0111199	3
G70_P3G05-SC_37C	G70_P3G05	70	P3G05	P3_SC_37C	SC_37C	CGAATGCCATACAAA	-0.0211242	0.0183344	9	0.498117	0.575714	-0.0134127	-0.00771144	-0.0168743	0.00876048	4	-0.0621084	0.0272051	5
G70_P3G05-SC_37C	G70_P3G05	70	P3G05	P3_SC_37C	SC_37C	CGATGATGATGATGA	-0.00240702	0.00359176	10	0.225974	0.297911	-0.00514166	0.00273465	-0.0062712	0.00554397	5	0.000254383	0.00460094	5
G70_P3G05-SC_37C	G70_P3G05	70	P3G05	P3_SC_37C	SC_37C	CGCGATCAATCCTCT	-0.0622525	0.0121079	9	0.0370422	0.0648902	-0.0589946	-0.00325783	-0.0354934	0.0171418	5	-0.0690812	0.00865947	4
G70_P3G05-SC_37C	G70_P3G05	70	P3G05	P3_SC_37C	SC_37C	CTAAGCAGTCTTCTC	-0.1775	0.0420056	10	2.18927e-10	3.78455e-08	-0.147803	-0.0296977	-0.353247	0.0126764	5	-0.164108	0.00349935	5
G70_P3G05-SC_37C	G70_P3G05	70	P3G05	P3_SC_37C	SC_37C	CTAAGTGTGAAGGAG	-0.133364	0.0379273	5	0.00190148	0.00539071	-0.133364	0	-0.169333	0.0163839	4	0.00938721	0.0326397	1
G70_P3G05-SC_37C	G70_P3G05	70	P3G05	P3_SC_37C	SC_37C	CTACTTACAACGGAA	-0.0056069	0.00456295	9	0.00338272	0.00870879	-0.000334256	-0.00527264	0.0105715	0.00371111	4	-0.0115525	0.00224974	5
G70_P3G05-SC_37C	G70_P3G05	70	P3G05	P3_SC_37C	SC_37C	CTAGTTGTATAGCCA	-0.0313406	0.00737005	10	0.00417722	0.0103962	-0.0337863	0.00244572	-0.0409837	0.0143493	5	-0.0306606	0.00381042	5
G70_P3G05-SC_37C	G70_P3G05	70	P3G05	P3_SC_37C	SC_37C	CTATCAAGGCTTAAT	0.011816	0.00283063	9	0.0252502	0.0471223	-0.00951787	0.0213339	0.0114653	0.002528	4	0.0131388	0.00490971	5
G70_P3G05-SC_37C	G70_P3G05	70	P3G05	P3_SC_37C	SC_37C	CTCGCTAATACTCCT	-0.0164479	0.00235658	10	0.00143531	0.0042648	-0.0144155	-0.00203246	-0.0130383	0.00409364	5	-0.0173582	0.00211516	5
G70_P3G05-SC_37C	G70_P3G05	70	P3G05	P3_SC_37C	SC_37C	CTCTTGAGAATACTT	-0.0935205	0.0100982	10	6.67604e-05	0.000346082	-0.100861	0.00734083	-0.107174	0.0187704	5	-0.0912716	0.00761807	5
G70_P3G05-SC_37C	G70_P3G05	70	P3G05	P3_SC_37C	SC_37C	CTGATTTGTGCTGTC	0.0320434	0.0171722	6	0.244105	0.318011	0.0084187	0.0236247	0.0368106	0.0364644	3	0.0315705	0.0114846	3
G70_P3G05-SC_37C	G70_P3G05	70	P3G05	P3_SC_37C	SC_37C	CTTGATCAATCAAAA	-0.145738	0.016396	10	7.46609e-08	1.81651e-06	-0.0987804	-0.0469572	-0.20492	0.0138667	5	-0.127602	0.00767616	5
G70_P3G05-SC_37C	G70_P3G05	70	P3G05	P3_SC_37C	SC_37C	CTTGCAAGTGTAATT	-0.0120663	0.0045844	10	0.00157017	0.00459254	-0.00269507	-0.00937124	-0.0238171	0.00691185	5	-0.0095833	0.00317724	5
G70_P3G05-SC_37C	G70_P3G05	70	P3G05	P3_SC_37C	SC_37C	CTTTCTTGTGTATTT	-0.0733175	0.0234772	6	0.119569	0.174555	-0.080249	0.0069315	-0.117435	0.0595039	1	-0.0644605	0.0266616	5
G70_P3G05-SC_37C	G70_P3G05	70	P3G05	P3_SC_37C	SC_37C	GAACTCAGGTTCCAT	-0.0529112	0.0272508	10	0.0491379	0.0824392	-0.0336499	-0.0192613	-0.0440257	0.00764414	5	-0.154757	0.0258797	5
G70_P3G05-SC_37C	G70_P3G05	70	P3G05	P3_SC_37C	SC_37C	GAGAATGAAGGACAG	-0.0351701	0.0532996	10	0.300988	0.378651	-0.0393988	0.00422869	-0.0311979	0.00542849	5	-0.246649	0.0396094	5
G70_P3G05-SC_37C	G70_P3G05	70	P3G05	P3_SC_37C	SC_37C	GAGTGCTTCAAAGTT	0.0236146	0.00505821	9	0.00385751	0.00972734	0.00639281	0.0172218	0.0270471	0.00413062	4	0.0131817	0.00720135	5
G70_P3G05-SC_37C	G70_P3G05	70	P3G05	P3_SC_37C	SC_37C	GCCCTCGAAACCTAT	-0.027099	0.0139582	4	0.465322	0.544209	-0.0594649	0.0323659	-0.0303791	0.0339939	1	-0.0259991	0.0196851	3
G70_P3G05-SC_37C	G70_P3G05	70	P3G05	P3_SC_37C	SC_37C	GCTAATTTCAAGAAT	-0.071708	0.00779993	10	0.000274678	0.00108763	-0.1467	0.0749918	-0.0710066	0.0153421	5	-0.0718202	0.00613391	5
G70_P3G05-SC_37C	G70_P3G05	70	P3G05	P3_SC_37C	SC_37C	GCTGCTTATGAGGAT	-0.00241024	0.00237128	9	0.52632	0.602607	-0.00893866	0.00652842	0.00151513	0.00307909	5	-0.00547521	0.00272079	4
G70_P3G05-SC_37C	G70_P3G05	70	P3G05	P3_SC_37C	SC_37C	GGTTGCCCAGAAGTA	-0.0396978	0.00389218	10	0.000103773	0.000494342	-0.036133	-0.00356475	-0.0384139	0.00447485	5	-0.0425834	0.00670875	5
G70_P3G05-SC_37C	G70_P3G05	70	P3G05	P3_SC_37C	SC_37C	GTAATCTGACTCTAG	-0.0429606	0.00700122	10	0.00298018	0.00782212	-0.0618965	0.0189359	-0.0432796	0.0048505	5	-0.0403215	0.0139513	5
G70_P3G05-SC_37C	G70_P3G05	70	P3G05	P3_SC_37C	SC_37C	GTACAAGAAATTTTG	-0.0287751	0.0197244	10	0.184073	0.250847	-0.0137529	-0.0150222	-0.0423549	0.0397744	5	-0.0277303	0.0110322	5
G70_P3G05-SC_37C	G70_P3G05	70	P3G05	P3_SC_37C	SC_37C	GTCACCGGCACTAAC	-0.0146281	0.00604453	9	0.215787	0.286665	-0.00534868	-0.00927945	-0.0125938	0.00660443	4	-0.0192352	0.00993895	5
G70_P3G05-SC_37C	G70_P3G05	70	P3G05	P3_SC_37C	SC_37C	GTGTGATTACTAAAT	-0.0310518	0.00693844	10	0.0315311	0.0566704	-0.0463609	0.0153091	-0.0246138	0.00877637	5	-0.040093	0.0104005	5
G70_P3G05-SC_37C	G70_P3G05	70	P3G05	P3_SC_37C	SC_37C	GTTAAATCAACAGTT	-0.0228843	0.00435981	10	0.0177197	0.0351491	-0.0321192	0.0092349	-0.0162454	0.00595587	5	-0.0285625	0.00550807	5
G70_P3G05-SC_37C	G70_P3G05	70	P3G05	P3_SC_37C	SC_37C	GTTCAGCTTTGATCG	-0.378678	0.0280785	4	0.000876741	0.00284776	-0.213555	-0.165123	-0.378678	0.0280785	4
G70_P3G05-SC_37C	G70_P3G05	70	P3G05	P3_SC_37C	SC_37C	GTTGAACTGGTTGTT	-0.0119571	0.00806765	10	0.459463	0.538432	-0.00922277	-0.00273431	-0.00921874	0.0114301	5	-0.0152482	0.0125306	5
G70_P3G05-SC_37C	G70_P3G05	70	P3G05	P3_SC_37C	SC_37C	GTTGGGCGCTTAAAG	0.000375223	0.00183013	10	0.856161	0.887583	-0.000664285	0.00103951	0.000379755	0.00268655	5	0.000370695	0.00268502	5
G70_P3G05-SC_37C	G70_P3G05	70	P3G05	P3_SC_37C	SC_37C	GTTTAGCTTCCGTTG	-0.0208269	0.00516887	10	0.000898479	0.00290108	-0.0426792	0.0218523	-0.0323453	0.00867801	5	-0.0192262	0.00323502	5
G70_P3G05-SC_37C	G70_P3G05	70	P3G05	P3_SC_37C	SC_37C	GTTTGTTTTGGGAAA	-0.0628274	0.0120845	5	0.0104394	0.0226755	-0.082592	0.0197646	-0.0703157	0.0123433	4	-0.0332864	0.0245163	1
G70_P3G05-SC_37C	G70_P3G05	70	P3G05	P3_SC_37C	SC_37C	TAACCTCGCGCTGAG	0.0186949	0.00316531	10	0.00468898	0.011471	0.00308065	0.0156142	0.0167167	0.00573352	5	0.0193261	0.0032388	5
G70_P3G05-SC_37C	G70_P3G05	70	P3G05	P3_SC_37C	SC_37C	TAATATTGTTTTGCG	-0.0755193	0.023661	9	0.07236	0.114418	-0.109047	0.0335274	-0.0699693	0.0243903	5	-0.0961545	0.0470299	4
G70_P3G05-SC_37C	G70_P3G05	70	P3G05	P3_SC_37C	SC_37C	TAGACGGACATCTTC	0.030786	0.00301053	6	0.000663529	0.00227389	0.000336127	0.0304498	0.034759	0.00304092	2	0.0260587	0.00331706	4
G70_P3G05-SC_37C	G70_P3G05	70	P3G05	P3_SC_37C	SC_37C	TATATTGAACTTTAC	0.00927934	0.00196884	10	0.00441057	0.0108754	0.0042387	0.00504064	0.00901365	0.00292964	5	0.00953262	0.00286036	5
G70_P3G05-SC_37C	G70_P3G05	70	P3G05	P3_SC_37C	SC_37C	TATGCCCTTCTTCTG	0.00458974	0.00208122	10	0.169046	0.233538	-0.0127424	0.0173322	0.00376252	0.00328339	5	0.00518862	0.00279371	5
G70_P3G05-SC_37C	G70_P3G05	70	P3G05	P3_SC_37C	SC_37C	TCAAAACGGAGTGTT	0.000514856	0.00197419	10	0.317425	0.395496	-0.00216713	0.00268198	-0.00218253	0.00309355	5	0.00192592	0.00223748	5
G70_P3G05-SC_37C	G70_P3G05	70	P3G05	P3_SC_37C	SC_37C	TCAAAGCATGAAAAA	-0.144502	0.0245979	10	0.000222799	0.000916582	-0.0702694	-0.0742328	-0.109258	0.0132546	5	-0.229627	0.0205991	5
G70_P3G05-SC_37C	G70_P3G05	70	P3G05	P3_SC_37C	SC_37C	TCAAATGATGAGGAT	0.00179168	0.00385379	10	0.607802	0.677728	-0.0161742	0.0179659	0.00291468	0.00643047	5	0.00112873	0.00494078	5
G70_P3G05-SC_37C	G70_P3G05	70	P3G05	P3_SC_37C	SC_37C	TCAACAACCTATGCA	0.00866165	0.00447318	9	0.116172	0.170214	0.00126751	0.00739413	0.0119958	0.00704359	4	0.00610976	0.00616212	5
G70_P3G05-SC_37C	G70_P3G05	70	P3G05	P3_SC_37C	SC_37C	TCATAGGTATCTCGC	-0.00341153	0.00177491	10	0.0996716	0.149682	-0.0034091	-2.42994e-06	-0.00356008	0.00225568	5	-0.00316563	0.00290212	5
G70_P3G05-SC_37C	G70_P3G05	70	P3G05	P3_SC_37C	SC_37C	TCGATAGAATTTACT	-0.0570304	0.0237587	9	0.00146065	0.00432808	-0.0528411	-0.00418931	-0.130876	0.0393908	4	-0.0565538	0.0031648	5
G70_P3G05-SC_37C	G70_P3G05	70	P3G05	P3_SC_37C	SC_37C	TCTTGGAGGTGAATG	-0.0809726	0.00917472	10	1.29247e-06	1.51304e-05	-0.0609332	-0.0200393	-0.0861095	0.00359538	5	-0.0477979	0.00913684	5
G70_P3G05-SC_37C	G70_P3G05	70	P3G05	P3_SC_37C	SC_37C	TGATCATCACGGGAC	-0.0576591	0.0103491	10	1.39562e-06	1.60381e-05	-0.0368104	-0.0208487	-0.0919536	0.00858285	5	-0.0402075	0.00612262	5
G70_P3G05-SC_37C	G70_P3G05	70	P3G05	P3_SC_37C	SC_37C	TGGAGTCTTTGTTGA	-0.0697064	0.017575	7	0.0565223	0.0926323	-0.0760209	0.00631447	-0.0867335	0.0773613	2	-0.069645	0.00464352	5
G70_P3G05-SC_37C	G70_P3G05	70	P3G05	P3_SC_37C	SC_37C	TTAATTAGAGGTATG	-0.00441745	0.0278921	7	0.835418	0.871884	-0.0165451	0.0121277	-0.00389569	0.0042322	5	-0.115521	0.0617584	2
G70_P3G05-SC_37C	G70_P3G05	70	P3G05	P3_SC_37C	SC_37C	TTAATTGCACTTATG	-0.0593585	0.0185518	6	0.0149451	0.0304849	-0.0441327	-0.0152257	-0.0846937	0.0224849	4	-0.0386291	0.0203386	2
G70_P3G05-SC_37C	G70_P3G05	70	P3G05	P3_SC_37C	SC_37C	TTAGTCTTTCCATCA	-0.467865	0.00336555	3	3.8423e-05	0.000222311	-0.183045	-0.28482	-0.467865	0.00336555	3
G70_P3G05-SC_37C	G70_P3G05	70	P3G05	P3_SC_37C	SC_37C	TTATATTTATTTGCT	-0.0209263	0.00302903	10	0.0018659	0.00529959	-0.0132206	-0.00770566	-0.0182961	0.00507143	5	-0.0222319	0.00357312	5
G70_P3G05-SC_37C	G70_P3G05	70	P3G05	P3_SC_37C	SC_37C	TTTAACTCACCGTAA	-0.0154147	0.0144966	10	0.288745	0.365835	-0.0184056	0.00299092	-0.0243541	0.0298178	5	-0.0150535	0.00599357	5
G70_P3G05-SC_37C	G70_P3G05	70	P3G05	P3_SC_37C	SC_37C	TTTATAAATCAATAG	0.00423003	0.00157515	10	0.0891818	0.136596	-0.000226545	0.00445657	0.00218249	0.00218404	5	0.00593583	0.00199347	5
G70_P3G05-SC_37C	G70_P3G05	70	P3G05	P3_SC_37C	SC_37C	TTTTGCATTTAGGCG	0.00714234	0.00398484	10	7.61736e-07	1.01922e-05	-0.00776484	0.0149072	0.0174466	0.00209574	5	-0.00466299	0.0022432	5
G5150_P3G05-SC_37C	G5150_P3G05	5150	P3G05	P3_SC_37C	SC_37C	AAAACATTATCAAAG	-6.85835e-05	0.00182112	6	0.142105	0.201871	-0.00194739	0.00187881	-0.00170572	0.00103882	5	0.00781556	0.00227969	1
G5150_P3G05-SC_37C	G5150_P3G05	5150	P3G05	P3_SC_37C	SC_37C	AAAAGAAAAATGTAT	-0.00425431	0.00361761	7	0.396513	0.476358	0.0167521	-0.0210064	-0.000847773	0.000960382	5	-0.0194478	0.00202823	2
G5150_P3G05-SC_37C	G5150_P3G05	5150	P3G05	P3_SC_37C	SC_37C	AAAAGCGACATTTCT	-0.0123459	0.0013279	8	6.31886e-05	0.000331567	-0.0396226	0.0272767	-0.0141393	0.00166034	5	-0.0106356	0.00162141	3
G5150_P3G05-SC_37C	G5150_P3G05	5150	P3G05	P3_SC_37C	SC_37C	AATGATACCATTTTT	-0.0985786	0.00911562	9	9.6516e-06	7.37607e-05			-0.0932739	0.00405309	4	-0.126644	0.00932265	5
G5150_P3G05-SC_37C	G5150_P3G05	5150	P3G05	P3_SC_37C	SC_37C	ACAACCTACCTGCTA	-0.000336325	0.00127097	9	0.904949	0.926669	-0.00239255	0.00205623	-0.000205815	0.000994667	5	-0.00133639	0.00275341	4
G5150_P3G05-SC_37C	G5150_P3G05	5150	P3G05	P3_SC_37C	SC_37C	ACAAGTTTTACAGTT	-0.0216494	0.0295973	8	0.493189	0.57076	-0.0260819	0.00443253	-0.0215644	0.00205971	5	-0.10888	0.0660054	3
G5150_P3G05-SC_37C	G5150_P3G05	5150	P3G05	P3_SC_37C	SC_37C	ACAGGGCAGCTCCCG	-0.0285175	0.00196771	7	4.41216e-05	0.000247466	-0.0397814	0.0112639	-0.0293698	0.0021248	5	-0.0248636	0.0043995	2
G5150_P3G05-SC_37C	G5150_P3G05	5150	P3G05	P3_SC_37C	SC_37C	ACAGTTGACGGACAG	0.000946556	0.00128887	7	0.653919	0.719092	-0.00517114	0.0061177	0.000740757	0.00174715	5	0.00112078	0.00160753	2
G5150_P3G05-SC_37C	G5150_P3G05	5150	P3G05	P3_SC_37C	SC_37C	ACCACCGGTCCTGCC	-0.00556739	0.00335751	6	0.323287	0.401514	-0.000431459	-0.00513594	-0.00312241	0.00281066	5	-0.0177308	0.006269	1
G5150_P3G05-SC_37C	G5150_P3G05	5150	P3G05	P3_SC_37C	SC_37C	AGAACATCATCTACA	-0.115859	0.0164284	8	0.00177433	0.00508491	-0.223556	0.107697	-0.103552	0.0178605	5	-0.147643	0.0287028	3
G5150_P3G05-SC_37C	G5150_P3G05	5150	P3G05	P3_SC_37C	SC_37C	AGAAGACGACGATGA	-0.108589	0.00758334	8	7.66141e-06	6.12072e-05	-0.0663318	-0.0422567	-0.103657	0.00584904	5	-0.13084	0.0124244	3
G5150_P3G05-SC_37C	G5150_P3G05	5150	P3G05	P3_SC_37C	SC_37C	AGATTCATCCCATGG	0.00267349	0.00225484	7	0.170291	0.234867	0.0346566	-0.0319831	-0.00255467	0.00183785	5	0.00411823	0.000966118	2
G5150_P3G05-SC_37C	G5150_P3G05	5150	P3G05	P3_SC_37C	SC_37C	AGTGTATGATAATAT	-0.0332327	0.00156322	10	3.70972e-12	3.30085e-09	-0.0233157	-0.00991703	-0.0316944	0.000556714	5	-0.0392173	0.00109807	5
G5150_P3G05-SC_37C	G5150_P3G05	5150	P3G05	P3_SC_37C	SC_37C	AGTGTTAATCAGACC	-0.00979851	0.0030403	6	0.0119525	0.0253694	-0.0221393	0.0123408	-0.0118414	0.00274631	5	0.000362227	0.00612473	1
G5150_P3G05-SC_37C	G5150_P3G05	5150	P3G05	P3_SC_37C	SC_37C	AGTTTATAAAAAATT	-0.0177017	0.00540163	5	0.0302528	0.0547841	0.0188846	-0.0365863	-0.0177017	0.00540163	5
G5150_P3G05-SC_37C	G5150_P3G05	5150	P3G05	P3_SC_37C	SC_37C	ATAATTTTCATCCAC	-0.143968	0.0644202	3	0.154974	0.217253	-0.104223	-0.0397447	-0.143968	0.0644202	3
G5150_P3G05-SC_37C	G5150_P3G05	5150	P3G05	P3_SC_37C	SC_37C	ATAGAGCGGCGTTGA	-0.0113031	0.00251342	6	0.000622534	0.00214996	-0.0178801	0.00657697	-0.0135319	0.00146146	5	-0.000366334	0.00323736	1
G5150_P3G05-SC_37C	G5150_P3G05	5150	P3G05	P3_SC_37C	SC_37C	ATATTGAGTAAGTAC	-0.00974302	0.00158429	7	0.0031152	0.00813034	-0.0106469	0.000903898	-0.0101958	0.00192872	5	-0.00835254	0.00338004	2
G5150_P3G05-SC_37C	G5150_P3G05	5150	P3G05	P3_SC_37C	SC_37C	ATCGTTGGCATTTGG	-0.0538092	0.0125947	9	7.08237e-06	5.75506e-05	-0.0437201	-0.0100891	-0.0963542	0.0106412	5	-0.0513156	0.00257621	4
G5150_P3G05-SC_37C	G5150_P3G05	5150	P3G05	P3_SC_37C	SC_37C	ATGGCGATGGTCTTG	0.00270681	0.00260405	6	0.450389	0.529942	-0.007843	0.0105498	0.00262087	0.00316908	5	0.00313483	0.00707225	1
G5150_P3G05-SC_37C	G5150_P3G05	5150	P3G05	P3_SC_37C	SC_37C	ATTAATACTTTGCAG	-0.158017	0.0221573	3	0.0190927	0.037302	-0.105046	-0.052971	-0.158017	0.0221573	3
G5150_P3G05-SC_37C	G5150_P3G05	5150	P3G05	P3_SC_37C	SC_37C	ATTATCAAGTGCCAG	-0.0836223	0.00880614	6	0.000155063	0.000683033	-0.104003	0.0203807	-0.0760376	0.00548668	5	-0.121496	0.0122605	1
G5150_P3G05-SC_37C	G5150_P3G05	5150	P3G05	P3_SC_37C	SC_37C	ATTATCATCGCCATC	-0.138948	0.0324985	6	0.811578	0.852646	-0.127728	-0.0112206	-0.0145755	0.0572478	1	-0.163853	0.0256173	5
G5150_P3G05-SC_37C	G5150_P3G05	5150	P3G05	P3_SC_37C	SC_37C	CAAGGATCCCCGTAG	-0.0117745	0.00153482	5	0.00130553	0.00396066	-0.0174624	0.00568787	-0.0117745	0.00153482	5
G5150_P3G05-SC_37C	G5150_P3G05	5150	P3G05	P3_SC_37C	SC_37C	CAAGTTCGGCGAAAT	-0.000508325	0.00610044	6	0.960617	0.969941	-0.00943237	0.00892404	-0.000334297	0.00186853	4	-0.0157096	0.0174635	2
G5150_P3G05-SC_37C	G5150_P3G05	5150	P3G05	P3_SC_37C	SC_37C	CAATCTTGAATTGAT	-0.0149534	0.00167115	9	0.000258834	0.00103402	-0.000313742	-0.0146397	-0.0155258	0.00284025	5	-0.0147379	0.00174296	4
G5150_P3G05-SC_37C	G5150_P3G05	5150	P3G05	P3_SC_37C	SC_37C	CAATTTCAACGTTGT	-0.087714	0.0113831	6	0.00657689	0.0152965	-0.0701227	-0.0175913	-0.0924252	0.0227747	3	-0.086647	0.0108387	3
G5150_P3G05-SC_37C	G5150_P3G05	5150	P3G05	P3_SC_37C	SC_37C	CATATGCATTCCTTG	0.00031746	0.00069876	10	0.827226	0.865456	-0.00684678	0.00716424	0.000160987	0.000550694	5	0.00121974	0.0013224	5
G5150_P3G05-SC_37C	G5150_P3G05	5150	P3G05	P3_SC_37C	SC_37C	CATCAATGAGGCAGT	-0.140272	0.0192522	7	0.00160205	0.00467591	-0.195177	0.0549053	-0.151336	0.026993	5	-0.137507	0.0134939	2
G5150_P3G05-SC_37C	G5150_P3G05	5150	P3G05	P3_SC_37C	SC_37C	CATTGTCGGACGCTT	-0.0524593	0.0353444	5	0.0987711	0.148706			-0.103432	0.0534529	3	-0.05206	0.00473061	2
G5150_P3G05-SC_37C	G5150_P3G05	5150	P3G05	P3_SC_37C	SC_37C	CATTTATGGCTATCT	-0.0475345	0.00330777	7	3.0806e-06	2.96791e-05	-0.0957317	0.0481972	-0.0552552	0.00274693	5	-0.046051	0.00120412	2
G5150_P3G05-SC_37C	G5150_P3G05	5150	P3G05	P3_SC_37C	SC_37C	CCAACACAGGCTTCG	-0.0533752	0.00431695	5	0.000240646	0.00097392	-0.0257215	-0.0276537	-0.0533752	0.00431695	5
G5150_P3G05-SC_37C	G5150_P3G05	5150	P3G05	P3_SC_37C	SC_37C	CCAAGACCGTGTAAA	-0.0959366	0.0112536	9	0.000102196	0.000488884	-0.233836	0.1379	-0.0935591	0.00523105	5	-0.128002	0.0192107	4
G5150_P3G05-SC_37C	G5150_P3G05	5150	P3G05	P3_SC_37C	SC_37C	CCAGGATGTACCGCC	-0.0663057	0.0197701	5	0.0284439	0.052015	-0.0966343	0.0303287	-0.0663057	0.0197701	5
G5150_P3G05-SC_37C	G5150_P3G05	5150	P3G05	P3_SC_37C	SC_37C	CCGTTAGTATCGCTA	-0.00409053	0.0027235	5	0.202386	0.27138	-0.00985291	0.00576238	-0.00409053	0.0027235	5
G5150_P3G05-SC_37C	G5150_P3G05	5150	P3G05	P3_SC_37C	SC_37C	CGAACAGAAACACAA	-0.0657608	0.00529436	5	0.000238095	0.000966738	-0.0491679	-0.0165929	-0.0657608	0.00529436	5
G5150_P3G05-SC_37C	G5150_P3G05	5150	P3G05	P3_SC_37C	SC_37C	CGAATGCCATACAAA	-0.00187914	0.00244608	6	0.635636	0.703332	-0.0134127	0.0115336	-0.00148578	0.00293719	5	-0.00383685	0.0065526	1
G5150_P3G05-SC_37C	G5150_P3G05	5150	P3G05	P3_SC_37C	SC_37C	CGATGATGATGATGA	0.00054955	0.000922245	8	0.29777	0.375361	-0.00514166	0.00569121	0.00104826	0.000918785	5	-0.00117918	0.00171061	3
G5150_P3G05-SC_37C	G5150_P3G05	5150	P3G05	P3_SC_37C	SC_37C	CGCGATCAATCCTCT	-0.0586864	0.0100551	6	0.00585055	0.013824	-0.0589946	0.00030824	-0.062071	0.0115916	5	-0.0417683	0.0259158	1
G5150_P3G05-SC_37C	G5150_P3G05	5150	P3G05	P3_SC_37C	SC_37C	CTAAGCAGTCTTCTC	-0.20174	0.00502734	10	3.44647e-10	5.10496e-08	-0.147803	-0.0539372	-0.211005	0.0057175	5	-0.191815	0.00591793	5
G5150_P3G05-SC_37C	G5150_P3G05	5150	P3G05	P3_SC_37C	SC_37C	CTACTTACAACGGAA	0.00999958	0.00262585	7	0.0128708	0.0269194	-0.000334256	0.0103338	0.00524625	0.00152225	5	0.0177282	0.00194106	2
G5150_P3G05-SC_37C	G5150_P3G05	5150	P3G05	P3_SC_37C	SC_37C	CTAGTTGTATAGCCA	-0.0207877	0.00302765	6	0.00492263	0.0119372	-0.0337863	0.0129987	-0.0201987	0.00362143	5	-0.0237235	0.00808547	1
G5150_P3G05-SC_37C	G5150_P3G05	5150	P3G05	P3_SC_37C	SC_37C	CTATCAAGGCTTAAT	-0.119609	0.0615206	6	0.0552157	0.0907656	-0.00951787	-0.110091	-0.0609556	0.0227472	5	-0.412852	0.0508624	1
G5150_P3G05-SC_37C	G5150_P3G05	5150	P3G05	P3_SC_37C	SC_37C	CTATGCATTTACTCA	-0.114775	0.0439832	3	0.120799	0.176081			-0.114775	0.0439832	3
G5150_P3G05-SC_37C	G5150_P3G05	5150	P3G05	P3_SC_37C	SC_37C	CTCGCTAATACTCCT	0.000969125	0.00153028	9	0.902246	0.924545	-0.0144155	0.0153846	0.000186417	0.00101509	5	0.00530067	0.00238796	4
G5150_P3G05-SC_37C	G5150_P3G05	5150	P3G05	P3_SC_37C	SC_37C	CTCTTGAGAATACTT	-0.0502469	0.00245421	6	6.62483e-05	0.000343585	-0.100861	0.0506144	-0.0505413	0.0029645	5	-0.0487819	0.0066138	1
G5150_P3G05-SC_37C	G5150_P3G05	5150	P3G05	P3_SC_37C	SC_37C	CTGATTTGTGCTGTC	-0.0367388	0.0104192	4	0.000722899	0.00243381	0.0084187	-0.0451575	-0.0403721	0.000653896	2	-0.0115493	0.00172174	2
G5150_P3G05-SC_37C	G5150_P3G05	5150	P3G05	P3_SC_37C	SC_37C	CTTGATCAATCAAAA	-0.144372	0.0110976	8	6.85895e-05	0.000354531	-0.0987804	-0.0455914	-0.14274	0.0102639	5	-0.155701	0.0270448	3
G5150_P3G05-SC_37C	G5150_P3G05	5150	P3G05	P3_SC_37C	SC_37C	CTTGCAAGTGTAATT	-0.00120653	0.00278664	10	0.552057	0.626718	-0.00269507	0.00148855	0.00190595	0.00245888	5	-0.00833311	0.00372071	5
G5150_P3G05-SC_37C	G5150_P3G05	5150	P3G05	P3_SC_37C	SC_37C	CTTTCTTGTGTATTT	-0.124092	0.0234678	6	0.0247049	0.0462662	-0.080249	-0.0438431	-0.109965	0.0361836	4	-0.124148	0.00228307	2
G5150_P3G05-SC_37C	G5150_P3G05	5150	P3G05	P3_SC_37C	SC_37C	GAACTCAGGTTCCAT	-0.079063	0.0540561	6	0.000499207	0.00179108	-0.0336499	-0.0454132	-0.0247429	0.00244217	5	-0.348854	0.00544264	1
G5150_P3G05-SC_37C	G5150_P3G05	5150	P3G05	P3_SC_37C	SC_37C	GAGAATGAAGGACAG	-0.0369483	0.0306769	8	0.280832	0.357336	-0.0393988	0.0024505	-0.0369292	0.00102359	5	-0.125551	0.069672	3
G5150_P3G05-SC_37C	G5150_P3G05	5150	P3G05	P3_SC_37C	SC_37C	GAGTGCTTCAAAGTT	0.00568773	0.00709391	9	0.552808	0.627342	0.00639281	-0.000705074	0.00573862	0.000995576	5	-0.00697693	0.0157068	4
G5150_P3G05-SC_37C	G5150_P3G05	5150	P3G05	P3_SC_37C	SC_37C	GCAAGAAAGAAACCC	-0.0716163	0.0205157	4	0.116643	0.170807	-0.0501908	-0.0214255	-0.0757359	0.0284186	3	-0.0592562	0.0492246	1
G5150_P3G05-SC_37C	G5150_P3G05	5150	P3G05	P3_SC_37C	SC_37C	GCCCTCGAAACCTAT	-0.0634473	0.00796337	3	0.133797	0.19173	-0.0594649	-0.00398238	-0.0642329	0.0137095	2	-0.0618743	0.019399	1
G5150_P3G05-SC_37C	G5150_P3G05	5150	P3G05	P3_SC_37C	SC_37C	GCTAATTTCAAGAAT	-0.148734	0.0388571	5	0.20745	0.277365	-0.1467	-0.00203417	-0.106599	0.0985422	2	-0.153902	0.0345123	3
G5150_P3G05-SC_37C	G5150_P3G05	5150	P3G05	P3_SC_37C	SC_37C	GCTGCTTATGAGGAT	-0.00683496	0.0017636	7	0.0110402	0.0237568	-0.00893866	0.00210369	-0.00797195	0.00210946	5	-0.00434476	0.00312183	2
G5150_P3G05-SC_37C	G5150_P3G05	5150	P3G05	P3_SC_37C	SC_37C	GGTGGAAGTAGCAGT	-0.00267674	0.00410238	5	0.547351	0.62251	-0.00624002	0.00356328	-0.00267674	0.00410238	5
G5150_P3G05-SC_37C	G5150_P3G05	5150	P3G05	P3_SC_37C	SC_37C	GGTTGCCCAGAAGTA	-0.067347	0.0104338	10	2.19884e-10	3.78455e-08	-0.036133	-0.031214	-0.0814155	0.00158315	5	-0.0258465	0.00271909	5
G5150_P3G05-SC_37C	G5150_P3G05	5150	P3G05	P3_SC_37C	SC_37C	GTAATCTGACTCTAG	-0.0090811	0.00770699	4	0.322932	0.401274	-0.0618965	0.0528154	-0.0090811	0.00770699	4
G5150_P3G05-SC_37C	G5150_P3G05	5150	P3G05	P3_SC_37C	SC_37C	GTACAAGAAATTTTG	-0.016432	0.00673946	7	0.120737	0.176012	-0.0137529	-0.00267911	-0.0162087	0.00645866	5	-0.0192526	0.0229557	2
G5150_P3G05-SC_37C	G5150_P3G05	5150	P3G05	P3_SC_37C	SC_37C	GTCACCGGCACTAAC	-0.00647502	0.00365073	7	0.019169	0.0374177	-0.00534868	-0.00112634	-0.0124868	0.0040021	5	-0.00237591	0.0033047	2
G5150_P3G05-SC_37C	G5150_P3G05	5150	P3G05	P3_SC_37C	SC_37C	GTGTGATTACTAAAT	-0.0860857	0.0137645	5	0.00332644	0.00858274	-0.0463609	-0.0397249	-0.0860857	0.0137645	5
G5150_P3G05-SC_37C	G5150_P3G05	5150	P3G05	P3_SC_37C	SC_37C	GTTAAATCAACAGTT	-0.0102259	0.00122736	8	0.000152403	0.000674179	-0.0321192	0.0218934	-0.0117905	0.00173409	5	-0.00956071	0.00113066	3
G5150_P3G05-SC_37C	G5150_P3G05	5150	P3G05	P3_SC_37C	SC_37C	GTTCAGCTTTGATCG	-0.124041	0.00999518	10	1.63154e-09	1.44142e-07	-0.213555	0.0895134	-0.162715	0.00703059	5	-0.116028	0.00320018	5
G5150_P3G05-SC_37C	G5150_P3G05	5150	P3G05	P3_SC_37C	SC_37C	GTTGAACTGGTTGTT	-0.0229697	0.00214154	10	1.6263e-05	0.000111435	-0.00922277	-0.0137469	-0.0221127	0.00129781	5	-0.0285672	0.0033168	5
G5150_P3G05-SC_37C	G5150_P3G05	5150	P3G05	P3_SC_37C	SC_37C	GTTGGGCGCTTAAAG	0.000845967	0.000593505	10	0.0823811	0.12791	-0.000664285	0.00151025	0.000991314	0.000522052	5	0.000174511	0.00112207	5
G5150_P3G05-SC_37C	G5150_P3G05	5150	P3G05	P3_SC_37C	SC_37C	GTTTAGCTTCCGTTG	-0.0725089	0.0090787	7	0.000901647	0.00291055	-0.0426792	-0.0298297	-0.0700771	0.00812272	5	-0.0941382	0.0242249	2
G5150_P3G05-SC_37C	G5150_P3G05	5150	P3G05	P3_SC_37C	SC_37C	GTTTGTTTTGGGAAA	-0.184054	0.0125864	5	0.000126897	0.000579033	-0.082592	-0.101462	-0.184054	0.0125864	5
G5150_P3G05-SC_37C	G5150_P3G05	5150	P3G05	P3_SC_37C	SC_37C	TAACCTCGCGCTGAG	-0.00552416	0.00319937	7	0.613835	0.683398	0.00308065	-0.0086048	-0.00203388	0.00419894	5	-0.0065943	0.00232504	2
G5150_P3G05-SC_37C	G5150_P3G05	5150	P3G05	P3_SC_37C	SC_37C	TAATATTGTTTTGCG	-0.164699	0.0211273	5	0.00145941	0.00432546	-0.109047	-0.0556526	-0.164699	0.0211273	5
G5150_P3G05-SC_37C	G5150_P3G05	5150	P3G05	P3_SC_37C	SC_37C	TACACCAATTACACT	-0.0907708	0.0180285	3	0.0372351	0.0651458			-0.0907708	0.0180285	3
G5150_P3G05-SC_37C	G5150_P3G05	5150	P3G05	P3_SC_37C	SC_37C	TAGACGGACATCTTC	-0.0115565	0.00348767	7	0.0880159	0.13511	0.000336127	-0.0118926	-0.00921168	0.00485822	5	-0.0119424	0.00197098	2
G5150_P3G05-SC_37C	G5150_P3G05	5150	P3G05	P3_SC_37C	SC_37C	TATATTGAACTTTAC	-0.00364708	0.00212398	6	0.286024	0.362979	0.0042387	-0.00788578	-0.00209086	0.00175896	5	-0.0113282	0.00390781	1
G5150_P3G05-SC_37C	G5150_P3G05	5150	P3G05	P3_SC_37C	SC_37C	TATGCCCTTCTTCTG	-0.0169798	0.00214661	9	0.000270912	0.00107374	-0.0127424	-0.00423737	-0.0193156	0.00375198	5	-0.0166874	0.00132746	4
G5150_P3G05-SC_37C	G5150_P3G05	5150	P3G05	P3_SC_37C	SC_37C	TCAAAACGGAGTGTT	-0.000219021	0.000802177	10	0.843515	0.878126	-0.00216713	0.00194811	-0.00019992	0.000600905	5	-0.000356254	0.00161067	5
G5150_P3G05-SC_37C	G5150_P3G05	5150	P3G05	P3_SC_37C	SC_37C	TCAAAGCATGAAAAA	-0.0463777	0.00306562	9	3.595e-06	3.36461e-05	-0.0702694	0.0238917	-0.0428467	0.00293608	5	-0.0538298	0.00426532	4
G5150_P3G05-SC_37C	G5150_P3G05	5150	P3G05	P3_SC_37C	SC_37C	TCAAATGATGAGGAT	-0.0306792	0.00439822	6	0.000158539	0.000693872	-0.0161742	-0.014505	-0.0265614	0.00197357	5	-0.0510581	0.00439045	1
G5150_P3G05-SC_37C	G5150_P3G05	5150	P3G05	P3_SC_37C	SC_37C	TCAACAACCTATGCA	-0.0019235	0.00138337	7	0.310574	0.388396	0.00126751	-0.00319101	-0.00190174	0.00120436	5	-0.00228212	0.00489024	2
G5150_P3G05-SC_37C	G5150_P3G05	5150	P3G05	P3_SC_37C	SC_37C	TCAGAGCATTGGCCT	-0.0469779	0.00592062	5	0.00135069	0.00406709			-0.0469779	0.00592062	5
G5150_P3G05-SC_37C	G5150_P3G05	5150	P3G05	P3_SC_37C	SC_37C	TCATAGGTATCTCGC	0.0013387	0.00793857	8	0.870889	0.899895	-0.0034091	0.00474779	0.00136432	0.000601579	5	-0.021582	0.0179947	3
G5150_P3G05-SC_37C	G5150_P3G05	5150	P3G05	P3_SC_37C	SC_37C	TCGAAAGCACAGTAG	-0.137152	0.0279733	7	0.019874	0.0385781	-0.151621	0.0144683	-0.0729315	0.0238954	5	-0.153444	0.0120352	2
G5150_P3G05-SC_37C	G5150_P3G05	5150	P3G05	P3_SC_37C	SC_37C	TCGATAGAATTTACT	-0.0444872	0.00724512	9	7.58728e-08	1.83881e-06	-0.0528411	0.00835396	-0.0702215	0.00389026	5	-0.0389061	0.00181167	4
G5150_P3G05-SC_37C	G5150_P3G05	5150	P3G05	P3_SC_37C	SC_37C	TCTTGGAGGTGAATG	-0.0379494	0.0483455	7	0.000688648	0.00234449	-0.0609332	0.0229838	-0.032196	0.0022111	5	-0.258771	0.0136983	2
G5150_P3G05-SC_37C	G5150_P3G05	5150	P3G05	P3_SC_37C	SC_37C	TGATCATCACGGGAC	-0.0386497	0.00644628	6	0.00777577	0.0176403	-0.0368104	-0.00183934	-0.0363242	0.00735609	5	-0.0502688	0.0164427	1
G5150_P3G05-SC_37C	G5150_P3G05	5150	P3G05	P3_SC_37C	SC_37C	TGGAGTCTTTGTTGA	-0.0562409	0.00779955	6	1.69566e-05	0.000115099	-0.0760209	0.01978	-0.0637618	0.00266052	5	-0.0188477	0.00593239	1
G5150_P3G05-SC_37C	G5150_P3G05	5150	P3G05	P3_SC_37C	SC_37C	TTAATTAGAGGTATG	-0.0105338	0.0030895	6	0.0541496	0.0892604	-0.0165451	0.00601136	-0.00981384	0.0036642	5	-0.0141228	0.00818127	1
G5150_P3G05-SC_37C	G5150_P3G05	5150	P3G05	P3_SC_37C	SC_37C	TTAATTGCACTTATG	-0.0137749	0.00329992	7	0.0212619	0.0408544	-0.0441327	0.0303578	-0.0133314	0.0031853	5	-0.0183338	0.0102129	2
G5150_P3G05-SC_37C	G5150_P3G05	5150	P3G05	P3_SC_37C	SC_37C	TTAGTCTTTCCATCA	-0.065708	0.00177747	5	2.79612e-06	2.74695e-05	-0.183045	0.117337	-0.065708	0.00177747	5
G5150_P3G05-SC_37C	G5150_P3G05	5150	P3G05	P3_SC_37C	SC_37C	TTATATTTATTTGCT	-2.31421e-05	0.00128914	9	0.238838	0.312129	-0.0132206	0.0131975	-0.00139542	0.00102961	5	0.00363863	0.0016819	4
G5150_P3G05-SC_37C	G5150_P3G05	5150	P3G05	P3_SC_37C	SC_37C	TTTAACTCACCGTAA	-0.0205072	0.00243322	8	0.000151183	0.000670446	-0.0184056	-0.00210155	-0.0171569	0.00203289	5	-0.0273227	0.0028995	3
G5150_P3G05-SC_37C	G5150_P3G05	5150	P3G05	P3_SC_37C	SC_37C	TTTATAAATCAATAG	-0.00336289	0.000784549	10	0.000134114	0.000606629	-0.000226545	-0.00313635	-0.00389553	0.000586205	5	-0.00128515	0.00115779	5
G5150_P3G05-SC_37C	G5150_P3G05	5150	P3G05	P3_SC_37C	SC_37C	TTTTGCATTTAGGCG	-0.0260793	0.00109726	8	1.23256e-06	1.46229e-05	-0.00776484	-0.0183145	-0.0257006	0.00139007	5	-0.0268416	0.00197216	3
G70_P3C03-SC_37C	G70_P3C03	70	P3C03	P3_SC_37C	SC_37C	AAAACATTATCAAAG	0.00258829	0.00694598	9	0.00159558	0.0046603	-0.00194739	0.00453568	0.0244143	0.00723928	4	-0.00597151	0.00453357	5
G70_P3C03-SC_37C	G70_P3C03	70	P3C03	P3_SC_37C	SC_37C	AAAAGAAAAATGTAT	0.015452	0.00998692	10	0.342933	0.421629	0.0167521	-0.00130003	-0.0110452	0.0162476	5	0.0160372	0.0024145	5
G70_P3C03-SC_37C	G70_P3C03	70	P3C03	P3_SC_37C	SC_37C	AAAAGCGACATTTCT	-0.0433064	0.00911069	7	0.0551907	0.0907485	-0.0396226	-0.00368381	-0.0440878	0.00658666	2	-0.0404839	0.0125182	5
G70_P3C03-SC_37C	G70_P3C03	70	P3C03	P3_SC_37C	SC_37C	ACAACCTACCTGCTA	-0.00142153	0.0100951	10	0.383505	0.463458	-0.00239255	0.000971028	0.012642	0.0200337	5	-0.00157568	0.00209744	5
G70_P3C03-SC_37C	G70_P3C03	70	P3C03	P3_SC_37C	SC_37C	ACAAGTTTTACAGTT	-0.0366431	0.0100509	10	0.15804	0.220534	-0.0260819	-0.0105612	-0.0208316	0.0185211	5	-0.0386992	0.00667887	5
G70_P3C03-SC_37C	G70_P3C03	70	P3C03	P3_SC_37C	SC_37C	ACAGGGCAGCTCCCG	-0.0369509	0.0161988	9	0.446789	0.526538	-0.0397814	0.00283048	-0.0199815	0.0381772	4	-0.0370028	0.00210998	5
G70_P3C03-SC_37C	G70_P3C03	70	P3C03	P3_SC_37C	SC_37C	ACAGTTGACGGACAG	-0.00133636	0.00416462	10	0.568359	0.641106	-0.00517114	0.00383478	0.0026895	0.00823533	5	-0.00150087	0.00166476	5
G70_P3C03-SC_37C	G70_P3C03	70	P3C03	P3_SC_37C	SC_37C	ACCACCGGTCCTGCC	-0.00159939	0.0130373	8	0.160066	0.222936	-0.000431459	-0.00116793	0.0296727	0.0310371	3	-0.0025509	0.00541389	5
G70_P3C03-SC_37C	G70_P3C03	70	P3C03	P3_SC_37C	SC_37C	AGAACATCATCTACA	-0.158493	0.0467988	5	0.0506807	0.084606	-0.223556	0.0650627	-0.122028	0.0389226	4	-0.30166	0.0771236	1
G70_P3C03-SC_37C	G70_P3C03	70	P3C03	P3_SC_37C	SC_37C	AGAAGACGACGATGA	-0.0695346	0.0123237	10	0.000125943	0.00057531	-0.0663318	-0.00320279	-0.0998423	0.0207012	5	-0.068029	0.00461393	5
G70_P3C03-SC_37C	G70_P3C03	70	P3C03	P3_SC_37C	SC_37C	AGATTCATCCCATGG	0.0340213	0.0108416	10	1.70959e-11	8.25572e-09	0.0346566	-0.000635207	0.0782001	0.00559845	5	0.0302438	0.00163706	5
G70_P3C03-SC_37C	G70_P3C03	70	P3C03	P3_SC_37C	SC_37C	AGTGTATGATAATAT	-0.0267775	0.0122807	10	0.0220812	0.042201	-0.0233157	-0.0034618	0.0199606	0.0112874	5	-0.0273872	0.00128916	5
G70_P3C03-SC_37C	G70_P3C03	70	P3C03	P3_SC_37C	SC_37C	AGTGTTAATCAGACC	-0.00812854	0.0139358	8	0.0282729	0.0517553	-0.0221393	0.0140108	0.0360451	0.0144337	3	-0.026989	0.00943133	5
G70_P3C03-SC_37C	G70_P3C03	70	P3C03	P3_SC_37C	SC_37C	AGTTTATAAAAAATT	0.0197058	0.00580253	10	0.00746838	0.0170426	0.0188846	0.000821135	0.0260792	0.0105671	5	0.0182358	0.00507496	5
G70_P3C03-SC_37C	G70_P3C03	70	P3C03	P3_SC_37C	SC_37C	ATAATTTTCATCCAC	-0.0908688	0.0408454	4	0.934568	0.950981	-0.104223	0.0133544	-0.00672326	0.0726955	1	-0.11879	0.041875	3
G70_P3C03-SC_37C	G70_P3C03	70	P3C03	P3_SC_37C	SC_37C	ATAGAGCGGCGTTGA	-0.0215009	0.0127788	9	0.274733	0.351046	-0.0178801	-0.00362086	-0.0237058	0.0289638	4	-0.0213026	0.00868611	5
G70_P3C03-SC_37C	G70_P3C03	70	P3C03	P3_SC_37C	SC_37C	ATAGTCGATTAAGAT	-0.0276476	0.0371858	4	0.32125	0.399502	-0.0361705	0.00852291	0.0416486	0.0365312	2	-0.0653314	0.0269393	2
G70_P3C03-SC_37C	G70_P3C03	70	P3C03	P3_SC_37C	SC_37C	ATATTGAGTAAGTAC	-0.00765734	0.0159132	8	0.0458631	0.0777195	-0.0106469	0.00298958	0.044395	0.0297028	3	-0.00922854	0.00516051	5
G70_P3C03-SC_37C	G70_P3C03	70	P3C03	P3_SC_37C	SC_37C	ATCGTTGGCATTTGG	-0.0085103	0.0208181	10	0.943514	0.956958	-0.0437201	0.0352098	0.00157925	0.0116157	5	-0.070429	0.0287754	5
G70_P3C03-SC_37C	G70_P3C03	70	P3C03	P3_SC_37C	SC_37C	ATGAAGTTCATAATG	0.0100138	0.0117169	7	0.00376166	0.00952031	0.0100138	0	0.0560882	0.0235133	2	0.00923374	0.00305952	5
G70_P3C03-SC_37C	G70_P3C03	70	P3C03	P3_SC_37C	SC_37C	ATGGCGATGGTCTTG	-0.00094526	0.0191769	10	0.8388	0.874607	-0.007843	0.00689774	-0.00597274	0.0396229	5	-0.000704487	0.0086711	5
G70_P3C03-SC_37C	G70_P3C03	70	P3C03	P3_SC_37C	SC_37C	ATTAATACTTTGCAG	-0.190391	0.0643664	3	0.495397	0.573098	-0.105046	-0.085345	-0.152875	0.150774	1	-0.209128	0.106553	2
G70_P3C03-SC_37C	G70_P3C03	70	P3C03	P3_SC_37C	SC_37C	ATTATCAAGTGCCAG	-0.031693	0.0159131	10	0.235454	0.30819	-0.104003	0.07231	-0.012426	0.0073869	5	-0.0891723	0.0127588	5
G70_P3C03-SC_37C	G70_P3C03	70	P3C03	P3_SC_37C	SC_37C	ATTATCATCGCCATC	-0.0833189	0.0402961	7	0.446807	0.526538	-0.127728	0.0444089	-0.0497503	0.0276635	2	-0.159859	0.0417721	5
G70_P3C03-SC_37C	G70_P3C03	70	P3C03	P3_SC_37C	SC_37C	CAAGGATCCCCGTAG	-0.0129689	0.00704864	6	0.657526	0.722102	-0.0174624	0.00449351	-0.00843712	0.0184313	1	-0.0138185	0.00798043	5
G70_P3C03-SC_37C	G70_P3C03	70	P3C03	P3_SC_37C	SC_37C	CAAGTTCGGCGAAAT	-0.00822234	0.00659365	6	0.889808	0.914701	-0.00943237	0.00121003	0.00227995	0.0163386	1	-0.0101554	0.00700962	5
G70_P3C03-SC_37C	G70_P3C03	70	P3C03	P3_SC_37C	SC_37C	CAATCTTGAATTGAT	0.00474095	0.00583726	9	0.0446384	0.0759438	-0.000313742	0.00505469	0.0168386	0.0110551	4	0.00358922	0.00341104	5
G70_P3C03-SC_37C	G70_P3C03	70	P3C03	P3_SC_37C	SC_37C	CAATTTCAACGTTGT	-0.0920074	0.0122373	7	0.00635653	0.0148395	-0.0701227	-0.0218846	-0.0897422	0.0187162	3	-0.0941797	0.0183286	4
G70_P3C03-SC_37C	G70_P3C03	70	P3C03	P3_SC_37C	SC_37C	CATATGCATTCCTTG	0.0184964	0.0123734	9	0.00424484	0.010533	-0.00684678	0.0253432	0.0544901	0.0171495	4	0.00843714	0.00906616	5
G70_P3C03-SC_37C	G70_P3C03	70	P3C03	P3_SC_37C	SC_37C	CATCAATGAGGCAGT	-0.227424	0.0384566	8	0.00680829	0.0157203	-0.195177	-0.0322473	-0.136406	0.0356995	4	-0.301417	0.0321879	4
G70_P3C03-SC_37C	G70_P3C03	70	P3C03	P3_SC_37C	SC_37C	CATTTATGGCTATCT	0.0250622	0.040429	7	0.483071	0.56077	-0.0957317	0.120794	0.029181	0.00544352	2	-0.0783341	0.0272742	5
G70_P3C03-SC_37C	G70_P3C03	70	P3C03	P3_SC_37C	SC_37C	CCAACACAGGCTTCG	-0.0355134	0.0130932	10	0.508149	0.585354	-0.0257215	-0.00979191	-0.011996	0.0247228	5	-0.0362228	0.00429382	5
G70_P3C03-SC_37C	G70_P3C03	70	P3C03	P3_SC_37C	SC_37C	CCAAGACCGTGTAAA	-0.210205	0.0350454	8	0.0308535	0.0556839	-0.233836	0.0236311	-0.154641	0.0571259	3	-0.240194	0.0419673	5
G70_P3C03-SC_37C	G70_P3C03	70	P3C03	P3_SC_37C	SC_37C	CCAGGATGTACCGCC	-0.100672	0.0152927	8	0.0157728	0.0318809	-0.0966343	-0.00403801	-0.0862357	0.0437865	3	-0.100956	0.00613726	5
G70_P3C03-SC_37C	G70_P3C03	70	P3C03	P3_SC_37C	SC_37C	CCGTTAGTATCGCTA	-0.0284681	0.0182931	8	0.0305082	0.0551823	-0.00985291	-0.0186152	0.0406171	0.0220514	3	-0.0357476	0.00715801	5
G70_P3C03-SC_37C	G70_P3C03	70	P3C03	P3_SC_37C	SC_37C	CGATGATGATGATGA	-0.00700448	0.0045293	10	0.626039	0.694503	-0.00514166	-0.00186282	-0.00264341	0.00891796	5	-0.00725767	0.00214876	5
G70_P3C03-SC_37C	G70_P3C03	70	P3C03	P3_SC_37C	SC_37C	CTAAGCAGTCTTCTC	-0.14147	0.0109575	10	2.95351e-05	0.000179385	-0.147803	0.00633308	-0.125771	0.020067	5	-0.144226	0.0084088	5
G70_P3C03-SC_37C	G70_P3C03	70	P3C03	P3_SC_37C	SC_37C	CTACTTACAACGGAA	-0.00128968	0.00711716	10	0.619104	0.688341	-0.000334256	-0.000955427	-0.00505665	0.0147343	5	-0.00122206	0.00197409	5
G70_P3C03-SC_37C	G70_P3C03	70	P3C03	P3_SC_37C	SC_37C	CTAGTTGTATAGCCA	-0.0446148	0.0179097	10	0.0428319	0.0733492	-0.0337863	-0.0108285	0.0245135	0.0148206	5	-0.0502235	0.00422154	5
G70_P3C03-SC_37C	G70_P3C03	70	P3C03	P3_SC_37C	SC_37C	CTATCAAGGCTTAAT	0.00616731	0.0130213	9	2.57693e-05	0.000160987	-0.00951787	0.0156852	0.0559163	0.00866235	4	-0.00688553	0.00443707	5
G70_P3C03-SC_37C	G70_P3C03	70	P3C03	P3_SC_37C	SC_37C	CTCGCTAATACTCCT	-0.00704025	0.00397646	10	0.609148	0.679151	-0.0144155	0.0073752	0.0016415	0.00667763	5	-0.00785013	0.00203952	5
G70_P3C03-SC_37C	G70_P3C03	70	P3C03	P3_SC_37C	SC_37C	CTCTTGAGAATACTT	-0.110852	0.020041	10	0.00860759	0.0192816	-0.100861	-0.00999094	-0.102442	0.0402069	5	-0.111734	0.0130196	5
G70_P3C03-SC_37C	G70_P3C03	70	P3C03	P3_SC_37C	SC_37C	CTGATTTGTGCTGTC	-0.0111992	0.0102795	5	0.967526	0.974173	0.0084187	-0.0196179	-0.00109462	0.0253328	1	-0.0136361	0.0124406	4
G70_P3C03-SC_37C	G70_P3C03	70	P3C03	P3_SC_37C	SC_37C	CTTGATCAATCAAAA	-0.0827546	0.0138164	10	0.0113894	0.0243608	-0.0987804	0.0160257	-0.0618216	0.0263022	5	-0.0843769	0.00732208	5
G70_P3C03-SC_37C	G70_P3C03	70	P3C03	P3_SC_37C	SC_37C	CTTGCAAGTGTAATT	0.000948035	0.00698819	9	0.0158377	0.0319861	-0.00269507	0.00364311	0.0214874	0.0112117	4	-0.000282898	0.00274471	5
G70_P3C03-SC_37C	G70_P3C03	70	P3C03	P3_SC_37C	SC_37C	CTTTCTTGTGTATTT	-0.110871	0.0191951	7	0.0178579	0.0353723	-0.080249	-0.0306221	-0.110318	0.0367901	3	-0.111117	0.0245467	4
G70_P3C03-SC_37C	G70_P3C03	70	P3C03	P3_SC_37C	SC_37C	GAACTCAGGTTCCAT	-0.0154442	0.0121388	7	0.0553849	0.0909935	-0.0336499	0.0182057	0.0179255	0.00596203	2	-0.0404761	0.00516374	5
G70_P3C03-SC_37C	G70_P3C03	70	P3C03	P3_SC_37C	SC_37C	GAGAATGAAGGACAG	-0.0556736	0.0145092	10	0.0347092	0.0613642	-0.0393988	-0.0162748	-0.0542918	0.0300391	5	-0.0557365	0.00641114	5
G70_P3C03-SC_37C	G70_P3C03	70	P3C03	P3_SC_37C	SC_37C	GAGTGCTTCAAAGTT	-0.00562989	0.0233313	10	0.691203	0.751993	0.00639281	-0.0120227	-0.0142634	0.0488412	5	-0.00547763	0.00648603	5
G70_P3C03-SC_37C	G70_P3C03	70	P3C03	P3_SC_37C	SC_37C	GCAAGAAAGAAACCC	-0.0391738	0.0360051	6	0.85792	0.88911	-0.0501908	0.0110171	-0.011468	0.0365439	2	-0.0846087	0.0467977	4
G70_P3C03-SC_37C	G70_P3C03	70	P3C03	P3_SC_37C	SC_37C	GCTGCTTATGAGGAT	-0.00406813	0.0104428	10	0.0446923	0.076025	-0.00893866	0.00487052	0.025772	0.0161098	5	-0.00465652	0.00226217	5
G70_P3C03-SC_37C	G70_P3C03	70	P3C03	P3_SC_37C	SC_37C	GGTTGCCCAGAAGTA	-0.0609306	0.0108987	9	0.000726138	0.00243946	-0.036133	-0.0247976	-0.0834652	0.0217298	4	-0.0593088	0.00582952	5
G70_P3C03-SC_37C	G70_P3C03	70	P3C03	P3_SC_37C	SC_37C	GTAATCTGACTCTAG	-0.0886671	0.022245	9	0.101454	0.151882	-0.0618965	-0.0267706	-0.0644602	0.0511014	4	-0.0894935	0.0094419	5
G70_P3C03-SC_37C	G70_P3C03	70	P3C03	P3_SC_37C	SC_37C	GTACAAGAAATTTTG	-0.00770273	0.0113037	8	0.224214	0.296123	-0.0137529	0.00605015	0.0184816	0.0138485	3	-0.0240594	0.0109454	5
G70_P3C03-SC_37C	G70_P3C03	70	P3C03	P3_SC_37C	SC_37C	GTCACCGGCACTAAC	0.0134967	0.0199811	7	0.0378779	0.0660385	-0.00534868	0.0188453	0.060234	0.0159278	2	-0.0251592	0.0144854	5
G70_P3C03-SC_37C	G70_P3C03	70	P3C03	P3_SC_37C	SC_37C	GTGTGATTACTAAAT	-0.052379	0.0168925	8	0.174762	0.239917	-0.0463609	-0.00601812	0.0153703	0.017931	3	-0.0530593	0.0017968	5
G70_P3C03-SC_37C	G70_P3C03	70	P3C03	P3_SC_37C	SC_37C	GTTAAATCAACAGTT	-0.0416017	0.0175409	10	0.4534	0.53273	-0.0321192	-0.00948243	0.0135458	0.0247281	5	-0.042432	0.00303432	5
G70_P3C03-SC_37C	G70_P3C03	70	P3C03	P3_SC_37C	SC_37C	GTTCAGCTTTGATCG	-0.299551	0.0349576	6	0.0482151	0.0811204	-0.213555	-0.0859967	-0.159007	0.0567942	1	-0.327475	0.0253153	5
G70_P3C03-SC_37C	G70_P3C03	70	P3C03	P3_SC_37C	SC_37C	GTTGAACTGGTTGTT	-0.00784207	0.0228262	9	0.83242	0.869629	-0.00922277	0.0013807	-0.00798251	0.0556225	4	-0.00784156	0.00336224	5
G70_P3C03-SC_37C	G70_P3C03	70	P3C03	P3_SC_37C	SC_37C	GTTGGGCGCTTAAAG	-0.0019169	0.00411456	10	0.977327	0.982456	-0.000664285	-0.00125262	-0.000134767	0.00777906	5	-0.00225409	0.00338371	5
G70_P3C03-SC_37C	G70_P3C03	70	P3C03	P3_SC_37C	SC_37C	GTTTAGCTTCCGTTG	-0.0343913	0.0125025	9	0.17394	0.238999	-0.0426792	0.00828791	0.00921627	0.00811479	4	-0.0547871	0.00554966	5
G70_P3C03-SC_37C	G70_P3C03	70	P3C03	P3_SC_37C	SC_37C	GTTTGTTTTGGGAAA	-0.102357	0.0220595	5	0.0641358	0.103116	-0.082592	-0.0197646	-0.102955	0.00557009	2	-0.0774931	0.0359002	3
G70_P3C03-SC_37C	G70_P3C03	70	P3C03	P3_SC_37C	SC_37C	TAACCTCGCGCTGAG	-0.00338736	0.0180944	10	0.11114	0.164018	0.00308065	-0.006468	-0.0415367	0.0329196	5	-0.00260441	0.00471604	5
G70_P3C03-SC_37C	G70_P3C03	70	P3C03	P3_SC_37C	SC_37C	TAGACGGACATCTTC	-0.00343517	0.00437128	7	0.347646	0.426243	0.000336127	-0.0037713	-0.00683016	0.00540436	2	-0.000756431	0.00480054	5
G70_P3C03-SC_37C	G70_P3C03	70	P3C03	P3_SC_37C	SC_37C	TATATTGAACTTTAC	0.00105374	0.00877512	10	0.61629	0.685702	0.0042387	-0.00318496	0.00644912	0.0180541	5	0.0008902	0.00314321	5
G70_P3C03-SC_37C	G70_P3C03	70	P3C03	P3_SC_37C	SC_37C	TATGCCCTTCTTCTG	-0.0149377	0.0214285	9	0.256537	0.331503	-0.0127424	-0.00219526	-0.0403961	0.0501618	4	-0.014881	0.00236721	5
G70_P3C03-SC_37C	G70_P3C03	70	P3C03	P3_SC_37C	SC_37C	TCAAAACGGAGTGTT	0.0021461	0.00453766	10	0.446402	0.526294	-0.00216713	0.00431323	-0.00400555	0.00865104	5	0.00255024	0.00221738	5
G70_P3C03-SC_37C	G70_P3C03	70	P3C03	P3_SC_37C	SC_37C	TCAAAGCATGAAAAA	-0.0496001	0.0177152	10	0.933479	0.949951	-0.0702694	0.0206693	0.00160374	0.0243963	5	-0.0606052	0.0113102	5
G70_P3C03-SC_37C	G70_P3C03	70	P3C03	P3_SC_37C	SC_37C	TCAAATGATGAGGAT	0.0301703	0.0185059	8	0.000440992	0.00161667	-0.0161742	0.0463445	0.0602156	0.00606764	3	-0.0240626	0.00815198	5
G70_P3C03-SC_37C	G70_P3C03	70	P3C03	P3_SC_37C	SC_37C	TCAACAACCTATGCA	-0.00738708	0.0118431	9	0.00544146	0.0129979	0.00126751	-0.00865459	0.0345465	0.0123717	4	-0.0164135	0.00573994	5
G70_P3C03-SC_37C	G70_P3C03	70	P3C03	P3_SC_37C	SC_37C	TCATAGGTATCTCGC	-0.00930416	0.00689511	10	0.720124	0.7758	-0.0034091	-0.00589506	-0.0034448	0.013996	5	-0.0094856	0.00246291	5
G70_P3C03-SC_37C	G70_P3C03	70	P3C03	P3_SC_37C	SC_37C	TCGAAAGCACAGTAG	-0.156961	0.0438505	6	0.501944	0.579492	-0.151621	-0.00534056	0.0392877	0.0535631	1	-0.19592	0.0238652	5
G70_P3C03-SC_37C	G70_P3C03	70	P3C03	P3_SC_37C	SC_37C	TCGATAGAATTTACT	-0.0467958	0.0136666	6	0.292224	0.369557	-0.0528411	0.00604534	0.0164411	0.0145718	1	-0.058176	0.00618163	5
G70_P3C03-SC_37C	G70_P3C03	70	P3C03	P3_SC_37C	SC_37C	TCTTGGAGGTGAATG	-0.0611561	0.0184334	8	0.0168329	0.0336901	-0.0609332	-0.000222827	-0.095145	0.0504051	3	-0.0610862	0.00228461	5
G70_P3C03-SC_37C	G70_P3C03	70	P3C03	P3_SC_37C	SC_37C	TGATCATCACGGGAC	-0.0326748	0.0258301	10	0.690665	0.751604	-0.0368104	0.00413558	-0.0157078	0.0536667	5	-0.0329509	0.00684564	5
G70_P3C03-SC_37C	G70_P3C03	70	P3C03	P3_SC_37C	SC_37C	TGGAGTCTTTGTTGA	-0.0913091	0.0195941	8	0.117448	0.17174	-0.0760209	-0.0152883	-0.0570907	0.052699	3	-0.0919917	0.00744277	5
G70_P3C03-SC_37C	G70_P3C03	70	P3C03	P3_SC_37C	SC_37C	TTAATTAGAGGTATG	-0.0225002	0.00831591	9	0.981237	0.985191	-0.0165451	-0.00595506	0.000224297	0.0143187	4	-0.0240478	0.00373668	5
G70_P3C03-SC_37C	G70_P3C03	70	P3C03	P3_SC_37C	SC_37C	TTAATTGCACTTATG	-0.0549415	0.012496	6	0.275635	0.352012	-0.0441327	-0.0108088	-0.0198286	0.027058	2	-0.0572806	0.00698375	4
G70_P3C03-SC_37C	G70_P3C03	70	P3C03	P3_SC_37C	SC_37C	TTAGTCTTTCCATCA	-0.0857744	0.0703901	6	0.261488	0.336503	-0.183045	0.0972708	-0.0499262	0.0209238	3	-0.291557	0.0501316	3
G70_P3C03-SC_37C	G70_P3C03	70	P3C03	P3_SC_37C	SC_37C	TTATATTTATTTGCT	0.00277825	0.00509507	10	0.0638379	0.102703	-0.0132206	0.0159989	0.011978	0.00895959	5	0.00145453	0.00339858	5
G70_P3C03-SC_37C	G70_P3C03	70	P3C03	P3_SC_37C	SC_37C	TTTAACTCACCGTAA	-0.0227067	0.0215966	6	0.0648907	0.104074	-0.0184056	-0.00430109	-0.101179	0.0403956	1	-0.00721684	0.0179473	5
G70_P3C03-SC_37C	G70_P3C03	70	P3C03	P3_SC_37C	SC_37C	TTTATAAATCAATAG	0.000316817	0.00575558	10	0.00140088	0.00419086	-0.000226545	0.000543362	0.018746	0.00759164	5	-0.000614926	0.00170699	5
G70_P3C03-SC_37C	G70_P3C03	70	P3C03	P3_SC_37C	SC_37C	TTTTGCATTTAGGCG	-0.0089983	0.00624784	10	0.668345	0.731532	-0.00776484	-0.00123345	0.00322078	0.0111178	5	-0.010089	0.00332167	5
G70_P3C03-SC_37C	G70_P3C03	70	P3C03	P3_SC_37C	SC_37C	CGAACAGAAACACAA	-0.0889281	0.0078129	4	0.00140585	0.0042007	-0.0491679	-0.0397603				-0.0889281	0.0078129	4
G70_P3C03-SC_37C	G70_P3C03	70	P3C03	P3_SC_37C	SC_37C	CGAATGCCATACAAA	-0.0155404	0.0177376	5	0.429475	0.509801	-0.0134127	-0.00212763				-0.0155404	0.0177376	5
G70_P3C03-SC_37C	G70_P3C03	70	P3C03	P3_SC_37C	SC_37C	CGCGATCAATCCTCT	-0.0942194	0.0259011	5	0.021936	0.0419556	-0.0589946	-0.0352248				-0.0942194	0.0259011	5
G70_P3C03-SC_37C	G70_P3C03	70	P3C03	P3_SC_37C	SC_37C	GCCCTCGAAACCTAT	-0.0434847	0.00638613	4	0.00616138	0.0144518	-0.0594649	0.0159802				-0.0434847	0.00638613	4
G70_P3C03-SC_37C	G70_P3C03	70	P3C03	P3_SC_37C	SC_37C	GCTAATTTCAAGAAT	-0.108505	0.0234459	4	0.0189341	0.0370504	-0.1467	0.0381949				-0.108505	0.0234459	4
G70_P3C03-SC_37C	G70_P3C03	70	P3C03	P3_SC_37C	SC_37C	GCTGCGGAGCCTCAG	-0.0740511	0.0590871	3	0.336693	0.415513						-0.0740511	0.0590871	3
G70_P3C03-SC_37C	G70_P3C03	70	P3C03	P3_SC_37C	SC_37C	GGTGGAAGTAGCAGT	0.0127932	0.00974798	3	0.317052	0.39515	-0.00624002	0.0190332				0.0127932	0.00974798	3
G70_P3C03-SC_37C	G70_P3C03	70	P3C03	P3_SC_37C	SC_37C	TAATATTGTTTTGCG	-0.142883	0.0476721	3	0.0955681	0.144695	-0.109047	-0.0338366				-0.142883	0.0476721	3
G70_P3D03-SC_37C	G70_P3D03	70	P3D03	P3_SC_37C	SC_37C	AAAACATTATCAAAG	-0.0116801	0.0112959	10	0.605403	0.675763	-0.00194739	-0.00973269	-0.00833072	0.0107888	5	-0.0235676	0.0203253	5
G70_P3D03-SC_37C	G70_P3D03	70	P3D03	P3_SC_37C	SC_37C	AAAAGAAAAATGTAT	0.00881739	0.0302252	10	0.798892	0.842588	0.0167521	-0.00793469	0.0100098	0.00709915	5	-0.0594922	0.0537326	5
G70_P3D03-SC_37C	G70_P3D03	70	P3D03	P3_SC_37C	SC_37C	AAAAGCGACATTTCT	-0.0721184	0.0183705	5	0.00189381	0.00537262	-0.0396226	-0.0324957	-0.0891488	0.00919869	4	-0.00533681	0.0182155	1
G70_P3D03-SC_37C	G70_P3D03	70	P3D03	P3_SC_37C	SC_37C	ACAACCTACCTGCTA	-0.00978363	0.00976794	10	0.391489	0.471113	-0.00239255	-0.00739107	-0.0122165	0.0111233	5	-0.00409099	0.0170149	5
G70_P3D03-SC_37C	G70_P3D03	70	P3D03	P3_SC_37C	SC_37C	ACAAGTTTTACAGTT	-0.00810622	0.00940992	10	0.0345684	0.0611761	-0.0260819	0.0179757	-0.0228955	0.00917206	5	0.0143087	0.0112918	5
G70_P3D03-SC_37C	G70_P3D03	70	P3D03	P3_SC_37C	SC_37C	ACAGGGCAGCTCCCG	-0.0292568	0.0069941	6	0.0163139	0.0328147	-0.0397814	0.0105246	-0.0294686	0.0081161	5	-0.0282553	0.0176485	1
G70_P3D03-SC_37C	G70_P3D03	70	P3D03	P3_SC_37C	SC_37C	ACAGTTGACGGACAG	-0.0186727	0.00668869	10	0.143482	0.203544	-0.00517114	-0.0135016	-0.0110567	0.00737817	5	-0.0309806	0.00937943	5
G70_P3D03-SC_37C	G70_P3D03	70	P3D03	P3_SC_37C	SC_37C	ACCACCGGTCCTGCC	-0.00796903	0.00665493	9	0.452982	0.532289	-0.000431459	-0.00753758	-0.00630992	0.00756226	5	-0.012193	0.0120663	4
G70_P3D03-SC_37C	G70_P3D03	70	P3D03	P3_SC_37C	SC_37C	AGAAGACGACGATGA	-0.0704766	0.0062337	10	1.52583e-05	0.000105966	-0.0663318	-0.00414479	-0.0710868	0.00737419	5	-0.0692035	0.0106512	5
G70_P3D03-SC_37C	G70_P3D03	70	P3D03	P3_SC_37C	SC_37C	AGATTCATCCCATGG	0.0199696	0.00866718	10	0.829376	0.867031	0.0346566	-0.0146869	-0.00193927	0.0124716	5	0.0263971	0.00675508	5
G70_P3D03-SC_37C	G70_P3D03	70	P3D03	P3_SC_37C	SC_37C	AGTGTATGATAATAT	-0.0243949	0.00438808	10	0.000273899	0.00108488	-0.0233157	-0.0010792	-0.0234143	0.00478468	5	-0.0267746	0.00745377	5
G70_P3D03-SC_37C	G70_P3D03	70	P3D03	P3_SC_37C	SC_37C	AGTGTTAATCAGACC	-0.0396987	0.014014	5	0.0490658	0.0823293	-0.0221393	-0.0175594	-0.0471196	0.0150696	4	-0.0102327	0.0300284	1
G70_P3D03-SC_37C	G70_P3D03	70	P3D03	P3_SC_37C	SC_37C	AGTTTATAAAAAATT	-0.00240121	0.0144217	9	0.980975	0.985081	0.0188846	-0.0212859	-0.000547955	0.012408	4	-0.0101169	0.0253175	5
G70_P3D03-SC_37C	G70_P3D03	70	P3D03	P3_SC_37C	SC_37C	ATAATTTTCATCCAC	-0.103417	0.0305215	4	0.0149287	0.0304614	-0.104223	0.000805744	-0.10555	0.00335037	2	-0.0315153	0.0194544	2
G70_P3D03-SC_37C	G70_P3D03	70	P3D03	P3_SC_37C	SC_37C	ATAGAGCGGCGTTGA	-0.0396717	0.0150686	10	0.110391	0.163066	-0.0178801	-0.0217917	-0.0394049	0.00940716	5	-0.0424609	0.0304103	5
G70_P3D03-SC_37C	G70_P3D03	70	P3D03	P3_SC_37C	SC_37C	ATAGTCGATTAAGAT	-0.0634762	0.0447069	3	0.0406115	0.0700398	-0.0361705	-0.0273057	-0.130538	0.00898653	1	-0.00285128	0.00854439	2
G70_P3D03-SC_37C	G70_P3D03	70	P3D03	P3_SC_37C	SC_37C	ATATTGAGTAAGTAC	-0.00624925	0.00656908	10	0.244434	0.318372	-0.0106469	0.00439767	-0.0097434	0.00727783	5	0.00145514	0.0108069	5
G70_P3D03-SC_37C	G70_P3D03	70	P3D03	P3_SC_37C	SC_37C	ATCGTTGGCATTTGG	-0.0453095	0.0409103	7	0.258193	0.333055	-0.0437201	-0.00158943	-0.0451234	0.00457399	5	-0.184018	0.124846	2
G70_P3D03-SC_37C	G70_P3D03	70	P3D03	P3_SC_37C	SC_37C	ATGGCGATGGTCTTG	-0.0276368	0.0155624	6	0.0395426	0.068538	-0.007843	-0.0197938	-0.0387458	0.0133004	5	0.0267848	0.0294384	1
G70_P3D03-SC_37C	G70_P3D03	70	P3D03	P3_SC_37C	SC_37C	ATTATCAAGTGCCAG	-0.131825	0.0196449	9	0.00378451	0.00956915	-0.104003	-0.0278218	-0.131761	0.0138587	4	-0.132245	0.035696	5
G70_P3D03-SC_37C	G70_P3D03	70	P3D03	P3_SC_37C	SC_37C	ATTATCATCGCCATC	-0.116924	0.011958	5	0.00861114	0.0192844	-0.127728	0.0108033	-0.124874	0.0264674	2	-0.114434	0.0148144	3
G70_P3D03-SC_37C	G70_P3D03	70	P3D03	P3_SC_37C	SC_37C	CAAGGATCCCCGTAG	-0.022246	0.0122397	4	0.0595751	0.0969397	-0.0174624	-0.00478361	-0.0322671	0.00890343	3	0.00839447	0.0155685	1
G70_P3D03-SC_37C	G70_P3D03	70	P3D03	P3_SC_37C	SC_37C	CAAGTTCGGCGAAAT	-0.0280534	0.0456981	5	0.173874	0.238935	-0.00943237	-0.0186211	-0.0974107	0.0672715	3	-0.0274672	0.00618468	2
G70_P3D03-SC_37C	G70_P3D03	70	P3D03	P3_SC_37C	SC_37C	CAATCTTGAATTGAT	-0.00664425	0.00584858	9	0.403353	0.483132	-0.000313742	-0.00633051	-0.00665241	0.00608652	4	-0.00662198	0.0100541	5
G70_P3D03-SC_37C	G70_P3D03	70	P3D03	P3_SC_37C	SC_37C	CAATTTCAACGTTGT	-0.0373077	0.0161536	4	0.192955	0.260784	-0.0701227	0.032815	-0.00851012	0.00687528	2	-0.0622653	0.00640049	2
G70_P3D03-SC_37C	G70_P3D03	70	P3D03	P3_SC_37C	SC_37C	CATATGCATTCCTTG	0.0158744	0.0172015	7	0.252973	0.327624	-0.00684678	0.0227212	-0.021509	0.020142	4	0.0318783	0.0131788	3
G70_P3D03-SC_37C	G70_P3D03	70	P3D03	P3_SC_37C	SC_37C	CATCAATGAGGCAGT	-0.250298	0.0267307	5	0.000157226	0.00068974	-0.195177	-0.0551214	-0.314316	0.0162968	3	-0.240003	0.00653535	2
G70_P3D03-SC_37C	G70_P3D03	70	P3D03	P3_SC_37C	SC_37C	CATTTATGGCTATCT	-0.205549	0.0231784	5	0.00330173	0.00853136	-0.0957317	-0.109817	-0.217466	0.025498	4	-0.158002	0.0509307	1
G70_P3D03-SC_37C	G70_P3D03	70	P3D03	P3_SC_37C	SC_37C	CCAACACAGGCTTCG	-0.0341643	0.00925977	9	0.0241042	0.04533	-0.0257215	-0.00844284	-0.0351639	0.0130096	5	-0.0329022	0.0146187	4
G70_P3D03-SC_37C	G70_P3D03	70	P3D03	P3_SC_37C	SC_37C	CCAAGACCGTGTAAA	-0.225498	0.0508151	5	0.0792127	0.123669	-0.233836	0.00833821	-0.190557	0.0883811	3	-0.227732	0.0223444	2
G70_P3D03-SC_37C	G70_P3D03	70	P3D03	P3_SC_37C	SC_37C	CCAGGATGTACCGCC	-0.106709	0.0219372	8	0.0034193	0.00878776	-0.0966343	-0.0100747	-0.104482	0.00614437	4	-0.166368	0.0318019	4
G70_P3D03-SC_37C	G70_P3D03	70	P3D03	P3_SC_37C	SC_37C	CCGTTAGTATCGCTA	0.00281535	0.00978262	7	0.370872	0.450771	-0.00985291	0.0126683	-0.0108771	0.0107354	3	0.0193728	0.0118052	4
G70_P3D03-SC_37C	G70_P3D03	70	P3D03	P3_SC_37C	SC_37C	CGAACAGAAACACAA	-0.102977	0.0485874	5	0.177514	0.243159	-0.0491679	-0.053809	-0.108959	0.0621726	4	-0.0790577	0.124318	1
G70_P3D03-SC_37C	G70_P3D03	70	P3D03	P3_SC_37C	SC_37C	CGAATGCCATACAAA	-0.0298009	0.015743	8	0.214947	0.285793	-0.0134127	-0.0163882	-0.0257125	0.0129066	5	-0.0602401	0.0352168	3
G70_P3D03-SC_37C	G70_P3D03	70	P3D03	P3_SC_37C	SC_37C	CGATGATGATGATGA	-0.0160783	0.00982626	10	0.366445	0.445739	-0.00514166	-0.0109366	-0.0120801	0.00880659	5	-0.031048	0.0170406	5
G70_P3D03-SC_37C	G70_P3D03	70	P3D03	P3_SC_37C	SC_37C	CTAAGCAGTCTTCTC	-0.144275	0.0178661	10	0.000407685	0.00151192	-0.147803	0.00352824	-0.14549	0.00831387	5	-0.122441	0.0352304	5
G70_P3D03-SC_37C	G70_P3D03	70	P3D03	P3_SC_37C	SC_37C	CTACTTACAACGGAA	-0.00351063	0.0104673	10	0.537525	0.61307	-0.000334256	-0.00317638	-0.00939705	0.0174682	5	-0.000231029	0.0130387	5
G70_P3D03-SC_37C	G70_P3D03	70	P3D03	P3_SC_37C	SC_37C	CTAGTTGTATAGCCA	-0.022934	0.0276504	8	0.0168291	0.0336901	-0.0337863	0.0108524	-0.096171	0.0413393	4	-0.0203531	0.00776032	4
G70_P3D03-SC_37C	G70_P3D03	70	P3D03	P3_SC_37C	SC_37C	CTATCAAGGCTTAAT	-0.0243167	0.00973844	9	0.0764621	0.120006	-0.00951787	-0.0147989	-0.0269443	0.0161018	5	-0.0231427	0.0107632	4
G70_P3D03-SC_37C	G70_P3D03	70	P3D03	P3_SC_37C	SC_37C	CTCGCTAATACTCCT	-0.0220559	0.0057639	10	0.00288361	0.0076088	-0.0144155	-0.00764046	-0.0266044	0.00743169	5	-0.0160095	0.00856849	5
G70_P3D03-SC_37C	G70_P3D03	70	P3D03	P3_SC_37C	SC_37C	CTCTTGAGAATACTT	-0.0972802	0.0245838	9	0.027334	0.05034	-0.100861	0.00358119	-0.0969663	0.0239609	5	-0.0987291	0.0514864	4
G70_P3D03-SC_37C	G70_P3D03	70	P3D03	P3_SC_37C	SC_37C	CTGATTTGTGCTGTC	0.00441195	0.0442115	9	0.0631912	0.101794	0.0084187	-0.00400675	-0.105229	0.0626305	5	0.00880971	0.0125434	4
G70_P3D03-SC_37C	G70_P3D03	70	P3D03	P3_SC_37C	SC_37C	CTTGATCAATCAAAA	-0.0860474	0.00909268	10	3.45482e-05	0.000203579	-0.0987804	0.012733	-0.0971515	0.0145749	5	-0.0801165	0.0106517	5
G70_P3D03-SC_37C	G70_P3D03	70	P3D03	P3_SC_37C	SC_37C	CTTGCAAGTGTAATT	-0.00776621	0.0100155	9	0.711781	0.769322	-0.00269507	-0.00507114	0.00273745	0.00661166	5	-0.0394035	0.0114747	4
G70_P3D03-SC_37C	G70_P3D03	70	P3D03	P3_SC_37C	SC_37C	GAACTCAGGTTCCAT	-0.0437958	0.0120208	10	0.00963438	0.0212004	-0.0336499	-0.0101459	-0.0371944	0.00664844	5	-0.0807406	0.0157283	5
G70_P3D03-SC_37C	G70_P3D03	70	P3D03	P3_SC_37C	SC_37C	GAGAATGAAGGACAG	-0.0382443	0.00719778	10	0.000210599	0.000875939	-0.0393988	0.00115448	-0.0408044	0.00390749	5	-0.0188509	0.0107546	5
G70_P3D03-SC_37C	G70_P3D03	70	P3D03	P3_SC_37C	SC_37C	GAGTGCTTCAAAGTT	-0.00853689	0.00597089	9	0.55778	0.631776	0.00639281	-0.0149297	-0.00394665	0.00624285	4	-0.0178624	0.00889816	5
G70_P3D03-SC_37C	G70_P3D03	70	P3D03	P3_SC_37C	SC_37C	GCAAGAAAGAAACCC	-0.108784	0.0608021	3	0.215028	0.28587	-0.0501908	-0.0585931	-0.108784	0.0608021	3
G70_P3D03-SC_37C	G70_P3D03	70	P3D03	P3_SC_37C	SC_37C	GCCCTCGAAACCTAT	-0.0568886	0.014769	3	0.237197	0.310239	-0.0594649	0.00257629	-0.0731278	0.0287772	1	-0.0481293	0.0211351	2
G70_P3D03-SC_37C	G70_P3D03	70	P3D03	P3_SC_37C	SC_37C	GCTAATTTCAAGAAT	-0.165755	0.0196331	3	0.0433518	0.0740685	-0.1467	-0.0190547	-0.198717	0.0139609	1	-0.143756	0.0114053	2
G70_P3D03-SC_37C	G70_P3D03	70	P3D03	P3_SC_37C	SC_37C	GCTGCTTATGAGGAT	-0.0487636	0.0240862	9	0.169074	0.23355	-0.00893866	-0.0398249	-0.0473608	0.00935122	5	-0.0919813	0.0519037	4
G70_P3D03-SC_37C	G70_P3D03	70	P3D03	P3_SC_37C	SC_37C	GGTGGAAGTAGCAGT	-0.0128656	0.0146032	4	0.5341	0.609889	-0.00624002	-0.00662557	-0.0147845	0.0201354	3	-0.00708714	0.0349409	1
G70_P3D03-SC_37C	G70_P3D03	70	P3D03	P3_SC_37C	SC_37C	GGTTGCCCAGAAGTA	-0.0236498	0.0129787	9	0.0103887	0.0225814	-0.036133	0.0124832	-0.0460402	0.012349	4	0.00567972	0.0141337	5
G70_P3D03-SC_37C	G70_P3D03	70	P3D03	P3_SC_37C	SC_37C	GTAATCTGACTCTAG	-0.0418712	0.0297706	9	0.00134409	0.00405014	-0.0618965	0.0200253	-0.131267	0.0337504	5	-0.0368942	0.00796344	4
G70_P3D03-SC_37C	G70_P3D03	70	P3D03	P3_SC_37C	SC_37C	GTACAAGAAATTTTG	0.00283452	0.0154765	7	0.834507	0.871079	-0.0137529	0.0165874	0.00420002	0.00760501	4	-0.0245281	0.0340433	3
G70_P3D03-SC_37C	G70_P3D03	70	P3D03	P3_SC_37C	SC_37C	GTCACCGGCACTAAC	-0.019653	0.0100913	5	0.245593	0.319447	-0.00534868	-0.0143043	-0.0167216	0.012089	4	-0.0312448	0.0240399	1
G70_P3D03-SC_37C	G70_P3D03	70	P3D03	P3_SC_37C	SC_37C	GTGTGATTACTAAAT	-0.0404582	0.00814285	10	0.0051219	0.0123292	-0.0463609	0.00590267	-0.0419177	0.0122916	5	-0.039108	0.0118222	5
G70_P3D03-SC_37C	G70_P3D03	70	P3D03	P3_SC_37C	SC_37C	GTTAAATCAACAGTT	-0.0470578	0.00967523	9	6.58238e-05	0.000342154	-0.0321192	-0.0149385	-0.0600593	0.00730749	5	-0.018701	0.010792	4
G70_P3D03-SC_37C	G70_P3D03	70	P3D03	P3_SC_37C	SC_37C	GTTCAGCTTTGATCG	-0.132523	0.0535833	5	0.000604092	0.00209907	-0.213555	0.0810318	-0.266915	0.0215912	3	-0.121161	0.00627796	2
G70_P3D03-SC_37C	G70_P3D03	70	P3D03	P3_SC_37C	SC_37C	GTTGAACTGGTTGTT	-0.00279975	0.0365298	7	0.123197	0.178908	-0.00922277	0.00642302	-0.0683386	0.0413481	5	-0.000119255	0.00836206	2
G70_P3D03-SC_37C	G70_P3D03	70	P3D03	P3_SC_37C	SC_37C	GTTGGGCGCTTAAAG	-0.00553155	0.00718308	10	0.661704	0.725858	-0.000664285	-0.00486726	-0.00409311	0.00590784	5	-0.0128234	0.0133016	5
G70_P3D03-SC_37C	G70_P3D03	70	P3D03	P3_SC_37C	SC_37C	GTTTAGCTTCCGTTG	-0.0569594	0.00919597	10	6.20985e-05	0.000326673	-0.0426792	-0.0142802	-0.061633	0.00512512	5	-0.0295289	0.0124165	5
G70_P3D03-SC_37C	G70_P3D03	70	P3D03	P3_SC_37C	SC_37C	TAACCTCGCGCTGAG	-0.00501388	0.0106768	10	0.140037	0.199296	0.00308065	-0.00809452	-0.0208698	0.0135039	5	0.0116579	0.013847	5
G70_P3D03-SC_37C	G70_P3D03	70	P3D03	P3_SC_37C	SC_37C	TAGACGGACATCTTC	0.00412075	0.0249938	3	0.622605	0.691248	0.000336127	0.00378462	-0.0295922	0.0440567	1	0.0215439	0.0316722	2
G70_P3D03-SC_37C	G70_P3D03	70	P3D03	P3_SC_37C	SC_37C	TATATTGAACTTTAC	0.0129205	0.00662981	10	0.156762	0.219143	0.0042387	0.0086818	0.0131122	0.00411549	5	0.0109588	0.0131661	5
G70_P3D03-SC_37C	G70_P3D03	70	P3D03	P3_SC_37C	SC_37C	TATGCCCTTCTTCTG	-0.0174162	0.0074601	10	0.0595275	0.0969072	-0.0127424	-0.00467378	-0.0198711	0.00629945	5	-0.00666415	0.0131836	5
G70_P3D03-SC_37C	G70_P3D03	70	P3D03	P3_SC_37C	SC_37C	TCAAAACGGAGTGTT	-0.0145241	0.00641021	10	0.102989	0.153755	-0.00216713	-0.012357	-0.0108694	0.00484091	5	-0.0294639	0.0097875	5
G70_P3D03-SC_37C	G70_P3D03	70	P3D03	P3_SC_37C	SC_37C	TCAAAGCATGAAAAA	-0.0567563	0.00694415	10	7.23038e-05	0.000371724	-0.0702694	0.0135131	-0.0637181	0.0115034	5	-0.0534292	0.00795245	5
G70_P3D03-SC_37C	G70_P3D03	70	P3D03	P3_SC_37C	SC_37C	TCAAATGATGAGGAT	-0.0209504	0.015089	9	0.0506023	0.0844864	-0.0161742	-0.00477622	-0.0447785	0.0251139	5	-0.0187239	0.00767686	4
G70_P3D03-SC_37C	G70_P3D03	70	P3D03	P3_SC_37C	SC_37C	TCAACAACCTATGCA	-0.0103465	0.00888171	10	0.446819	0.526538	0.00126751	-0.011614	-0.00936025	0.00539047	5	-0.0203326	0.0171526	5
G70_P3D03-SC_37C	G70_P3D03	70	P3D03	P3_SC_37C	SC_37C	TCATAGGTATCTCGC	-0.0066182	0.00649562	9	0.259261	0.334191	-0.0034091	-0.00320911	-0.00831878	0.00477466	5	0.00478598	0.0123645	4
G70_P3D03-SC_37C	G70_P3D03	70	P3D03	P3_SC_37C	SC_37C	TCGAAAGCACAGTAG	-0.203629	0.0308274	4	0.0363278	0.0637734	-0.151621	-0.0520087	-0.212184	0.0417184	3	-0.177942	0.0722901	1
G70_P3D03-SC_37C	G70_P3D03	70	P3D03	P3_SC_37C	SC_37C	TCGATAGAATTTACT	-0.064006	0.0230974	10	0.110389	0.163066	-0.0528411	-0.0111649	-0.0607995	0.0210226	5	-0.0778059	0.0436122	5
G70_P3D03-SC_37C	G70_P3D03	70	P3D03	P3_SC_37C	SC_37C	TCTTGGAGGTGAATG	-0.0686746	0.0205428	10	0.0643494	0.103379	-0.0609332	-0.00774133	-0.0574724	0.0182618	5	-0.107397	0.0339526	5
G70_P3D03-SC_37C	G70_P3D03	70	P3D03	P3_SC_37C	SC_37C	TGATCATCACGGGAC	-0.0272397	0.011035	10	0.00466501	0.0114281	-0.0368104	0.00957071	-0.0499931	0.01601	5	-0.0161498	0.0111772	5
G70_P3D03-SC_37C	G70_P3D03	70	P3D03	P3_SC_37C	SC_37C	TGGAGTCTTTGTTGA	-0.0800827	0.0183203	8	0.0173443	0.0345196	-0.0760209	-0.00406189	-0.0799141	0.0126017	5	-0.0827996	0.0505868	3
G70_P3D03-SC_37C	G70_P3D03	70	P3D03	P3_SC_37C	SC_37C	TTAATTAGAGGTATG	-0.0236511	0.00596194	9	0.000904531	0.0029191	-0.0165451	-0.00710598	-0.0318248	0.00796482	5	-0.0173638	0.00698557	4
G70_P3D03-SC_37C	G70_P3D03	70	P3D03	P3_SC_37C	SC_37C	TTAGTCTTTCCATCA	-0.332528	0.0635897	4	0.192141	0.259824	-0.183045	-0.149483	-0.295807	0.152635	1	-0.344823	0.0883195	3
G70_P3D03-SC_37C	G70_P3D03	70	P3D03	P3_SC_37C	SC_37C	TTATATTTATTTGCT	-0.0377045	0.0111108	10	0.0364807	0.0640328	-0.0132206	-0.0244839	-0.0391871	0.00996355	5	-0.0311564	0.020939	5
G70_P3D03-SC_37C	G70_P3D03	70	P3D03	P3_SC_37C	SC_37C	TTTAACTCACCGTAA	-0.0104274	0.0453292	6	0.22877	0.301023	-0.0184056	0.00797821	-0.0749548	0.0610639	4	-0.0097507	0.00625349	2
G70_P3D03-SC_37C	G70_P3D03	70	P3D03	P3_SC_37C	SC_37C	TTTATAAATCAATAG	-0.00827152	0.00494501	10	0.24909	0.323457	-0.000226545	-0.00804497	-0.00428732	0.00452831	5	-0.018522	0.00726336	5
G70_P3D03-SC_37C	G70_P3D03	70	P3D03	P3_SC_37C	SC_37C	TTTTGCATTTAGGCG	-0.014386	0.00836651	10	0.24483	0.318722	-0.00776484	-0.0066212	-0.0141164	0.00397081	5	-0.0192888	0.016931	5
G70_P1F05-SC_37C	G70_P1F05	70	P1F05	P1_SC_37C	SC_37C	AAAACATTATCAAAG	0.000277949	0.00423462	9	0.04103	0.0706345	-0.000652642	0.000930592	-0.0104908	0.00508303	4	0.0067249	0.00393293	5
G70_P1F05-SC_37C	G70_P1F05	70	P1F05	P1_SC_37C	SC_37C	AAAAGAAAAATGTAT	0.0433962	0.001779	10	2.3979e-09	1.93299e-07	0.0418506	0.00154566	0.041635	0.00219994	5	0.0457232	0.00252873	5
G70_P1F05-SC_37C	G70_P1F05	70	P1F05	P1_SC_37C	SC_37C	AAAAGCGACATTTCT	-0.0664257	0.00561416	7	0.000490093	0.00176499	-0.0616103	-0.00481547	-0.0707667	0.00993679	3	-0.0640371	0.00737107	4
G70_P1F05-SC_37C	G70_P1F05	70	P1F05	P1_SC_37C	SC_37C	ACAACCTACCTGCTA	-0.00329634	0.00305077	10	0.78447	0.829906	-0.00161883	-0.00167751	0.000791538	0.00282452	5	-0.0108224	0.00383248	5
G70_P1F05-SC_37C	G70_P1F05	70	P1F05	P1_SC_37C	SC_37C	ACAAGTTTTACAGTT	0.0227926	0.00204364	10	1.04144e-05	7.86255e-05	0.021037	0.00175559	0.0226582	0.00195767	5	0.023284	0.00374411	5
G70_P1F05-SC_37C	G70_P1F05	70	P1F05	P1_SC_37C	SC_37C	ACAGGGCAGCTCCCG	-0.0288374	0.00359971	10	6.26547e-06	5.23116e-05	-0.0292694	0.000432011	-0.0368115	0.00424583	5	-0.0226594	0.00373719	5
G70_P1F05-SC_37C	G70_P1F05	70	P1F05	P1_SC_37C	SC_37C	ACAGTTGACGGACAG	0.00161111	0.00162056	10	0.413631	0.493686	0.00149213	0.000118981	0.00118306	0.0020144	5	0.00231901	0.0025905	5
G70_P1F05-SC_37C	G70_P1F05	70	P1F05	P1_SC_37C	SC_37C	ACCACCGGTCCTGCC	0.00439606	0.00953973	10	0.209371	0.279484	-0.00133408	0.00573014	-0.016504	0.0170325	5	0.00506095	0.00303797	5
G70_P1F05-SC_37C	G70_P1F05	70	P1F05	P1_SC_37C	SC_37C	AGAAGACGACGATGA	-0.0397589	0.00410986	10	0.000150501	0.00066766	-0.0269064	-0.0128525	-0.0364437	0.00510201	5	-0.0448402	0.00631646	5
G70_P1F05-SC_37C	G70_P1F05	70	P1F05	P1_SC_37C	SC_37C	AGATTCATCCCATGG	0.00318774	0.014368	10	0.801317	0.844215	-0.00105522	0.00424296	0.00399422	0.00298837	5	-0.039214	0.0216686	5
G70_P1F05-SC_37C	G70_P1F05	70	P1F05	P1_SC_37C	SC_37C	AGTGTATGATAATAT	-0.0189024	0.0031954	10	0.00277403	0.00736961	-0.01028	-0.00862244	-0.0184283	0.00331354	5	-0.0203495	0.00578877	5
G70_P1F05-SC_37C	G70_P1F05	70	P1F05	P1_SC_37C	SC_37C	AGTGTTAATCAGACC	-0.0592803	0.0193589	6	0.000795399	0.0026275	-0.0454435	-0.0138368	-0.0996909	0.00841027	2	-0.0175292	0.00854862	4
G70_P1F05-SC_37C	G70_P1F05	70	P1F05	P1_SC_37C	SC_37C	AGTTTATAAAAAATT	0.0729333	0.00668312	9	0.000116901	0.000541955	0.0647237	0.00820959	0.0582993	0.00996441	5	0.0744337	0.00319064	4
G70_P1F05-SC_37C	G70_P1F05	70	P1F05	P1_SC_37C	SC_37C	ATAATTTTCATCCAC	-0.0133264	0.00769771	6	0.0676274	0.107852	-0.0111715	-0.00215494	-0.0180834	0.00480354	3	0.00514236	0.00946484	3
G70_P1F05-SC_37C	G70_P1F05	70	P1F05	P1_SC_37C	SC_37C	ATAGAGCGGCGTTGA	0.00114902	0.00382612	10	0.285915	0.362877	-0.011058	0.0122071	-0.00444578	0.00378733	5	0.0100787	0.00478475	5
G70_P1F05-SC_37C	G70_P1F05	70	P1F05	P1_SC_37C	SC_37C	ATAGTCGATTAAGAT	-0.0714586	0.0291336	6	0.170196	0.234761	-0.0514128	-0.0200457	-0.0924732	0.0972536	2	-0.0704082	0.0217426	4
G70_P1F05-SC_37C	G70_P1F05	70	P1F05	P1_SC_37C	SC_37C	ATATTGAGTAAGTAC	-0.0049427	0.00322182	10	0.773473	0.820641	0.00108997	-0.00603266	-0.00116787	0.0042172	5	-0.00918479	0.00447059	5
G70_P1F05-SC_37C	G70_P1F05	70	P1F05	P1_SC_37C	SC_37C	ATCGTTGGCATTTGG	-0.0690976	0.00485679	10	3.25654e-06	3.10618e-05	-0.105906	0.0368082	-0.0743705	0.00699704	5	-0.0643805	0.00661796	5
G70_P1F05-SC_37C	G70_P1F05	70	P1F05	P1_SC_37C	SC_37C	ATGAAGTTCATAATG	0.0392738	0.0281485	4	0.965376	0.972559	0.0266474	0.0126264	0.00304675	0.0621992	1	0.0513932	0.0359757	3
G70_P1F05-SC_37C	G70_P1F05	70	P1F05	P1_SC_37C	SC_37C	ATGGCGATGGTCTTG	-0.0168066	0.00495266	9	0.0587082	0.0957611	-0.00278687	-0.0140197	-0.0150019	0.00580295	5	-0.0211507	0.00900338	4
G70_P1F05-SC_37C	G70_P1F05	70	P1F05	P1_SC_37C	SC_37C	ATTAATACTTTGCAG	-0.058963	0.0112874	3	0.204689	0.274144	-0.0590057	4.27073e-05	-0.0581274	0.0194063	2	-0.060638	0.0274768	1
G70_P1F05-SC_37C	G70_P1F05	70	P1F05	P1_SC_37C	SC_37C	ATTATCAAGTGCCAG	-0.0674105	0.00687784	10	4.00376e-05	0.00023005	-0.0673298	-8.06645e-05	-0.076469	0.0109547	5	-0.0624752	0.00808594	5
G70_P1F05-SC_37C	G70_P1F05	70	P1F05	P1_SC_37C	SC_37C	ATTATCATCGCCATC	-0.0957737	0.0266112	8	0.025189	0.0470222	-0.0768754	-0.0188983	-0.109238	0.0263481	4	-0.0563734	0.0450715	4
G70_P1F05-SC_37C	G70_P1F05	70	P1F05	P1_SC_37C	SC_37C	CAAGGATCCCCGTAG	-0.0326604	0.00771579	6	0.0207618	0.0400419	-0.0256483	-0.00701204	-0.0349426	0.00498339	3	-0.0179418	0.0126553	3
G70_P1F05-SC_37C	G70_P1F05	70	P1F05	P1_SC_37C	SC_37C	CAAGTTCGGCGAAAT	0.00307624	0.00291586	8	0.188362	0.255742	-0.00314285	0.00621908	0.0056464	0.00507669	4	0.00206024	0.00319188	4
G70_P1F05-SC_37C	G70_P1F05	70	P1F05	P1_SC_37C	SC_37C	CAATCTTGAATTGAT	0.0154452	0.00560549	10	0.0851789	0.131516	0.0141933	0.00125191	0.0156102	0.00200046	5	0.0101108	0.0113752	5
G70_P1F05-SC_37C	G70_P1F05	70	P1F05	P1_SC_37C	SC_37C	CAATTTCAACGTTGT	-0.0557963	0.0100594	10	0.00431006	0.0106656	-0.0641989	0.00840258	-0.0414804	0.00897161	5	-0.0822006	0.0121843	5
G70_P1F05-SC_37C	G70_P1F05	70	P1F05	P1_SC_37C	SC_37C	CATATGCATTCCTTG	-0.00577249	0.00215402	10	0.0159804	0.0322325	-0.00930645	0.00353396	-0.00746016	0.00343379	5	-0.00473764	0.00268887	5
G70_P1F05-SC_37C	G70_P1F05	70	P1F05	P1_SC_37C	SC_37C	CATCAATGAGGCAGT	-0.174119	0.0182499	6	0.00125777	0.00384774	-0.170366	-0.00375315	-0.175312	0.010306	4	-0.13909	0.0558408	2
G70_P1F05-SC_37C	G70_P1F05	70	P1F05	P1_SC_37C	SC_37C	CATTTATGGCTATCT	-0.067759	0.0139635	7	0.053676	0.088644	-0.0900852	0.0223262	-0.0442713	0.0167591	3	-0.0889877	0.0159328	4
G70_P1F05-SC_37C	G70_P1F05	70	P1F05	P1_SC_37C	SC_37C	CCAACACAGGCTTCG	0.0128563	0.00169265	10	3.54781e-05	0.000207908	0.00488293	0.00797339	0.0129902	0.00185271	5	0.0125228	0.00292396	5
G70_P1F05-SC_37C	G70_P1F05	70	P1F05	P1_SC_37C	SC_37C	CCAAGACCGTGTAAA	-0.201872	0.0391244	4	0.071168	0.112863	-0.232802	0.0309302	-0.204484	0.0181589	2	-0.151733	0.0795634	2
G70_P1F05-SC_37C	G70_P1F05	70	P1F05	P1_SC_37C	SC_37C	CCAGGATGTACCGCC	-0.14281	0.0170341	7	0.000174125	0.00074899	-0.104767	-0.038043	-0.14413	0.00271434	3	-0.0954602	0.0162517	4
G70_P1F05-SC_37C	G70_P1F05	70	P1F05	P1_SC_37C	SC_37C	CCGTTAGTATCGCTA	0.00124618	0.0132467	7	0.8438	0.878276	-0.019524	0.0207701	0.00206717	0.00252541	4	-0.0408208	0.0180773	3
G70_P1F05-SC_37C	G70_P1F05	70	P1F05	P1_SC_37C	SC_37C	CGAACAGAAACACAA	-0.0542332	0.00866482	6	0.00671247	0.0155365	-0.0509589	-0.00327427	-0.0641802	0.0151167	3	-0.0503908	0.00939531	3
G70_P1F05-SC_37C	G70_P1F05	70	P1F05	P1_SC_37C	SC_37C	CGAATGCCATACAAA	-0.00948101	0.00521978	9	0.294209	0.371587	-0.0187919	0.00931093	-0.00573862	0.00306297	4	-0.0240569	0.00604486	5
G70_P1F05-SC_37C	G70_P1F05	70	P1F05	P1_SC_37C	SC_37C	CGATGATGATGATGA	-0.00165048	0.0031786	9	0.44929	0.528849	-0.00559316	0.00394268	-0.00361627	0.0048193	4	0.000116989	0.00456974	5
G70_P1F05-SC_37C	G70_P1F05	70	P1F05	P1_SC_37C	SC_37C	CGCGATCAATCCTCT	-0.043149	0.0155598	7	0.45565	0.534841	-0.0319146	-0.0112343	-0.024757	0.0437705	2	-0.045865	0.0168202	5
G70_P1F05-SC_37C	G70_P1F05	70	P1F05	P1_SC_37C	SC_37C	CTAAGCAGTCTTCTC	-0.148779	0.00784565	10	1.15759e-06	1.3946e-05	-0.133331	-0.0154487	-0.146681	0.00760111	5	-0.156172	0.014268	5
G70_P1F05-SC_37C	G70_P1F05	70	P1F05	P1_SC_37C	SC_37C	CTAAGTGTGAAGGAG	-0.103186	0.0131465	7	0.00599666	0.0141131	-0.131283	0.0280972	-0.114422	0.0168133	2	-0.0916405	0.0170433	5
G70_P1F05-SC_37C	G70_P1F05	70	P1F05	P1_SC_37C	SC_37C	CTACTTACAACGGAA	0.000648498	0.00386593	9	0.906861	0.927866	2.16745e-05	0.000626823	-0.000592778	0.0036561	5	0.0058063	0.00745275	4
G70_P1F05-SC_37C	G70_P1F05	70	P1F05	P1_SC_37C	SC_37C	CTAGTTGTATAGCCA	-0.0157492	0.00546777	10	0.128061	0.184721	-0.0228617	0.00711248	-0.012688	0.00598529	5	-0.0228359	0.00910681	5
G70_P1F05-SC_37C	G70_P1F05	70	P1F05	P1_SC_37C	SC_37C	CTATCAAGGCTTAAT	0.0134127	0.00280403	10	0.0193612	0.0377497	0.0109081	0.00250456	0.00911426	0.0037828	5	0.0170807	0.00349442	5
G70_P1F05-SC_37C	G70_P1F05	70	P1F05	P1_SC_37C	SC_37C	CTCGCTAATACTCCT	-0.0390759	0.00481537	10	2.5859e-05	0.000161385	-0.0375804	-0.00149557	-0.0364636	0.00250053	5	-0.0544122	0.00605868	5
G70_P1F05-SC_37C	G70_P1F05	70	P1F05	P1_SC_37C	SC_37C	CTCTTGAGAATACTT	-0.0688477	0.00874694	9	0.000755099	0.00252179	-0.0948968	0.0260491	-0.0702817	0.0141578	5	-0.0679782	0.0110242	4
G70_P1F05-SC_37C	G70_P1F05	70	P1F05	P1_SC_37C	SC_37C	CTGATTTGTGCTGTC	0.0445772	0.00197347	6	1.91028e-05	0.000127064	0.0375917	0.0069855	0.0431758	0.00248954	4	0.0457805	0.00230676	2
G70_P1F05-SC_37C	G70_P1F05	70	P1F05	P1_SC_37C	SC_37C	CTTGATCAATCAAAA	-0.0892756	0.00326205	10	3.51431e-08	1.08319e-06	-0.0824445	-0.00683111	-0.0885767	0.00295037	5	-0.0921727	0.00600673	5
G70_P1F05-SC_37C	G70_P1F05	70	P1F05	P1_SC_37C	SC_37C	CTTGCAAGTGTAATT	0.00595442	0.00262104	10	0.0088495	0.0197206	0.000560442	0.00539398	0.00929407	0.00298847	5	0.00120968	0.00356209	5
G70_P1F05-SC_37C	G70_P1F05	70	P1F05	P1_SC_37C	SC_37C	GAACTCAGGTTCCAT	-0.0408207	0.00673292	8	0.00484243	0.0117978	-0.0442945	0.00347379	-0.0474567	0.00987918	3	-0.0351226	0.00915449	5
G70_P1F05-SC_37C	G70_P1F05	70	P1F05	P1_SC_37C	SC_37C	GAGAATGAAGGACAG	0.011356	0.00174361	10	4.45205e-05	0.000249031	0.00446468	0.0068913	0.0121238	0.00178499	5	0.00932302	0.0029044	5
G70_P1F05-SC_37C	G70_P1F05	70	P1F05	P1_SC_37C	SC_37C	GAGTGCTTCAAAGTT	0.0194589	0.00188809	10	1.04574e-05	7.88543e-05	0.0186933	0.000765589	0.0191838	0.00166387	5	0.0206536	0.0034669	5
G70_P1F05-SC_37C	G70_P1F05	70	P1F05	P1_SC_37C	SC_37C	GCAAGAAAGAAACCC	-0.0235968	0.0098801	5	0.18791	0.255183	-0.0257965	0.00219971	-0.0198273	0.0117456	4	-0.0386274	0.0234543	1
G70_P1F05-SC_37C	G70_P1F05	70	P1F05	P1_SC_37C	SC_37C	GCCCTCGAAACCTAT	-0.0660536	0.0024337	9	6.91641e-08	1.73008e-06	-0.0598668	-0.00618681	-0.0693197	0.00432268	4	-0.0647353	0.00274631	5
G70_P1F05-SC_37C	G70_P1F05	70	P1F05	P1_SC_37C	SC_37C	GCTAATTTCAAGAAT	-0.0842228	0.030236	3	0.472132	0.550636	-0.0633115	-0.0209113	-0.0806276	0.0738724	1	-0.0860233	0.0522776	2
G70_P1F05-SC_37C	G70_P1F05	70	P1F05	P1_SC_37C	SC_37C	GCTGCTTATGAGGAT	-0.00229316	0.0018892	10	0.0377612	0.0658719	-0.0056472	0.00335404	-0.00409227	0.00220625	5	0.000499604	0.0027488	5
G70_P1F05-SC_37C	G70_P1F05	70	P1F05	P1_SC_37C	SC_37C	GGTGGAAGTAGCAGT	0.00548863	0.025271	4	0.771054	0.818354	0.00243518	0.00305346	-0.00751485	0.0144181	2	0.0567842	0.0286364	2
G70_P1F05-SC_37C	G70_P1F05	70	P1F05	P1_SC_37C	SC_37C	GGTTGCCCAGAAGTA	0.0107829	0.00262189	10	0.00708219	0.0162623	-0.0194968	0.0302798	0.00708633	0.00227366	5	0.0176661	0.00310254	5
G70_P1F05-SC_37C	G70_P1F05	70	P1F05	P1_SC_37C	SC_37C	GTAATCTGACTCTAG	-0.00546293	0.00507967	10	0.983156	0.986879	0.0077402	-0.0132031	-0.000154854	0.00982513	5	-0.00609843	0.00339961	5
G70_P1F05-SC_37C	G70_P1F05	70	P1F05	P1_SC_37C	SC_37C	GTACAAGAAATTTTG	-0.0723775	0.0155064	9	0.00322084	0.00835353	-0.0434344	-0.0289432	-0.0980867	0.0266262	4	-0.062154	0.0167905	5
G70_P1F05-SC_37C	G70_P1F05	70	P1F05	P1_SC_37C	SC_37C	GTCACCGGCACTAAC	-0.031623	0.00662694	7	0.00472121	0.0115386	-0.0259069	-0.00571604	-0.0443614	0.0127035	3	-0.0292142	0.00552411	4
G70_P1F05-SC_37C	G70_P1F05	70	P1F05	P1_SC_37C	SC_37C	GTGTGATTACTAAAT	-0.0183825	0.00770633	9	0.220176	0.291519	-0.0108598	-0.0075228	-0.0162214	0.00958294	4	-0.0220175	0.0124281	5
G70_P1F05-SC_37C	G70_P1F05	70	P1F05	P1_SC_37C	SC_37C	GTTAAATCAACAGTT	-0.0374267	0.00477841	10	0.000183154	0.00078082	-0.0412742	0.0038475	-0.0359975	0.00273117	5	-0.0490011	0.00777235	5
G70_P1F05-SC_37C	G70_P1F05	70	P1F05	P1_SC_37C	SC_37C	GTTCAGCTTTGATCG	-0.115579	0.00898442	9	7.91455e-05	0.000399804	-0.124119	0.00853972	-0.114707	0.00617832	4	-0.121491	0.0160872	5
G70_P1F05-SC_37C	G70_P1F05	70	P1F05	P1_SC_37C	SC_37C	GTTGAACTGGTTGTT	-0.0142838	0.00649432	7	0.0232448	0.0440262	-0.0331275	0.0188437	-0.0250969	0.00966932	4	-0.0116021	0.00481533	3
G70_P1F05-SC_37C	G70_P1F05	70	P1F05	P1_SC_37C	SC_37C	GTTGGGCGCTTAAAG	-0.00104111	0.00243806	10	0.421285	0.50138	-0.00339134	0.00235024	0.00225505	0.0033757	5	-0.00386551	0.00312481	5
G70_P1F05-SC_37C	G70_P1F05	70	P1F05	P1_SC_37C	SC_37C	GTTTAGCTTCCGTTG	-0.0100945	0.00284067	10	0.0164792	0.0330886	0.000432998	-0.0105275	-0.0106265	0.00196888	5	-0.00627384	0.00527612	5
G70_P1F05-SC_37C	G70_P1F05	70	P1F05	P1_SC_37C	SC_37C	GTTTGTTTTGGGAAA	-0.136681	0.0143673	10	9.85991e-05	0.000475512	-0.140287	0.00360617	-0.127141	0.0120806	5	-0.16912	0.0222765	5
G70_P1F05-SC_37C	G70_P1F05	70	P1F05	P1_SC_37C	SC_37C	TAACCTCGCGCTGAG	0.0364858	0.00161489	9	4.26516e-08	1.25014e-06	0.0247705	0.0117154	0.0367315	0.00214698	4	0.0361352	0.00256496	5
G70_P1F05-SC_37C	G70_P1F05	70	P1F05	P1_SC_37C	SC_37C	TAATATTGTTTTGCG	-0.0220657	0.0165959	8	0.0428366	0.0733492	-0.0703753	0.0483095	-0.0619728	0.0398957	3	-0.0206818	0.00742951	5
G70_P1F05-SC_37C	G70_P1F05	70	P1F05	P1_SC_37C	SC_37C	TAGACGGACATCTTC	0.0222485	0.01716	6	0.292545	0.36986	0.0214085	0.000840022	-0.0268974	0.0422243	2	0.023276	0.00610528	4
G70_P1F05-SC_37C	G70_P1F05	70	P1F05	P1_SC_37C	SC_37C	TATATTGAACTTTAC	0.00617987	0.00381122	10	0.844825	0.878664	0.0115448	-0.00536498	0.000648726	0.00305571	5	0.0169951	0.0042729	5
G70_P1F05-SC_37C	G70_P1F05	70	P1F05	P1_SC_37C	SC_37C	TATGCCCTTCTTCTG	0.0106336	0.00192841	10	0.00119605	0.0036861	0.00616433	0.00446924	0.0101952	0.00240342	5	0.0113842	0.00314495	5
G70_P1F05-SC_37C	G70_P1F05	70	P1F05	P1_SC_37C	SC_37C	TCAAAACGGAGTGTT	0.000691976	0.0023975	10	0.833083	0.87003	-0.00120033	0.0018923	0.0006529	0.0030766	5	0.000756049	0.00393963	5
G70_P1F05-SC_37C	G70_P1F05	70	P1F05	P1_SC_37C	SC_37C	TCAAAGCATGAAAAA	-0.0848078	0.00546054	10	4.50611e-06	4.00947e-05	-0.086374	0.00156619	-0.0791578	0.00708371	5	-0.0918661	0.00791745	5
G70_P1F05-SC_37C	G70_P1F05	70	P1F05	P1_SC_37C	SC_37C	TCAAATGATGAGGAT	0.0192302	0.0018901	10	2.29872e-06	2.35652e-05	0.0191963	3.38903e-05	0.0171553	0.00205011	5	0.0226681	0.0026389	5
G70_P1F05-SC_37C	G70_P1F05	70	P1F05	P1_SC_37C	SC_37C	TCAACAACCTATGCA	0.0349853	0.00225279	9	1.70658e-06	1.87303e-05	0.0238632	0.011122	0.0335013	0.00202547	4	0.0390499	0.00335218	5
G70_P1F05-SC_37C	G70_P1F05	70	P1F05	P1_SC_37C	SC_37C	TCATAGGTATCTCGC	-0.00457906	0.00241363	10	0.612282	0.682034	-0.00351693	-0.00106212	-0.00138067	0.00330316	5	-0.00745295	0.00313111	5
G70_P1F05-SC_37C	G70_P1F05	70	P1F05	P1_SC_37C	SC_37C	TCGAAAGCACAGTAG	-0.0729951	0.0350442	3	0.200837	0.269564	-0.135006	0.0620111	-0.133269	0.0435155	1	-0.0427188	0.0308412	2
G70_P1F05-SC_37C	G70_P1F05	70	P1F05	P1_SC_37C	SC_37C	TCGATAGAATTTACT	-0.0147127	0.00307399	9	0.0232519	0.0440263	-0.0242833	0.00957052	-0.0118244	0.00415027	4	-0.0179616	0.0044017	5
G70_P1F05-SC_37C	G70_P1F05	70	P1F05	P1_SC_37C	SC_37C	TCTTGGAGGTGAATG	-0.0347084	0.00294544	10	1.94749e-05	0.000128699	-0.0830805	0.0483721	-0.0342893	0.00224934	5	-0.0373071	0.00560091	5
G70_P1F05-SC_37C	G70_P1F05	70	P1F05	P1_SC_37C	SC_37C	TGATCATCACGGGAC	-0.0337346	0.00383034	10	2.25341e-05	0.000144412	-0.0208832	-0.0128514	-0.0388237	0.00440458	5	-0.0266891	0.00518251	5
G70_P1F05-SC_37C	G70_P1F05	70	P1F05	P1_SC_37C	SC_37C	TGGAGTCTTTGTTGA	-0.0570727	0.00594889	9	0.000584493	0.00204179	-0.063193	0.00612028	-0.048416	0.00837959	4	-0.0641804	0.00759292	5
G70_P1F05-SC_37C	G70_P1F05	70	P1F05	P1_SC_37C	SC_37C	TTAATTAGAGGTATG	-0.0186685	0.0118442	9	0.147901	0.208794	-0.0312409	0.0125724	0.0146685	0.0093839	4	-0.0441686	0.00820711	5
G70_P1F05-SC_37C	G70_P1F05	70	P1F05	P1_SC_37C	SC_37C	TTAATTGCACTTATG	-0.0398136	0.0228505	5	0.33468	0.413397	-0.072662	0.0328484	-0.0389422	0.0270692	3	-0.043384	0.0547934	2
G70_P1F05-SC_37C	G70_P1F05	70	P1F05	P1_SC_37C	SC_37C	TTAGTCTTTCCATCA	-0.200059	0.0168778	9	9.67887e-05	0.000469508	-0.204752	0.0046933	-0.185689	0.0278605	5	-0.205904	0.0177682	4
G70_P1F05-SC_37C	G70_P1F05	70	P1F05	P1_SC_37C	SC_37C	TTATATTTATTTGCT	-0.0165951	0.00486087	10	0.0466944	0.0788815	-0.0146704	-0.00192463	-0.016472	0.0037323	5	-0.017402	0.00955779	5
G70_P1F05-SC_37C	G70_P1F05	70	P1F05	P1_SC_37C	SC_37C	TTTAACTCACCGTAA	-0.0146562	0.00496375	10	0.173729	0.238763	-0.0171085	0.00245227	-0.0104488	0.00872092	5	-0.0162538	0.00537384	5
G70_P1F05-SC_37C	G70_P1F05	70	P1F05	P1_SC_37C	SC_37C	TTTATAAATCAATAG	0.00228332	0.00147603	10	0.011794	0.0250928	0.00352976	-0.00124645	0.00276132	0.00151143	5	0.000992755	0.00248348	5
G70_P1F05-SC_37C	G70_P1F05	70	P1F05	P1_SC_37C	SC_37C	TTTTGCATTTAGGCG	0.0051849	0.00160918	10	0.00414456	0.0103278	-0.0117231	0.016908	0.00541806	0.00215408	5	0.00487852	0.00246921	5
G2640_P1F05-SC_37C	G2640_P1F05	2640	P1F05	P1_SC_37C	SC_37C	AAAACATTATCAAAG	-0.000829418	0.00196358	9	0.150383	0.211746	-0.000652642	-0.000176776	0.00355978	0.00307689	4	-0.00225762	0.00175515	5
G2640_P1F05-SC_37C	G2640_P1F05	2640	P1F05	P1_SC_37C	SC_37C	AAAAGAAAAATGTAT	0.0169071	0.00157211	10	1.89226e-05	0.000126121	0.0418506	-0.0249435	0.0134	0.00241613	5	0.0177916	0.0012134	5
G2640_P1F05-SC_37C	G2640_P1F05	2640	P1F05	P1_SC_37C	SC_37C	AAAAGCGACATTTCT	-0.0250947	0.00524106	7	0.000238616	0.000967276	-0.0616103	0.0365155	-0.013328	0.00208349	5	-0.038855	0.00225309	2
G2640_P1F05-SC_37C	G2640_P1F05	2640	P1F05	P1_SC_37C	SC_37C	ACAACCTACCTGCTA	-0.00239097	0.00325834	9	0.00721918	0.0165494	-0.00161883	-0.000772134	0.00801552	0.00313195	5	-0.00382975	0.00116455	4
G2640_P1F05-SC_37C	G2640_P1F05	2640	P1F05	P1_SC_37C	SC_37C	ACAAGTTTTACAGTT	0.00817029	0.00116843	10	0.000146074	0.000651502	0.021037	-0.0128667	0.00787617	0.00216158	5	0.0082274	0.000952502	5
G2640_P1F05-SC_37C	G2640_P1F05	2640	P1F05	P1_SC_37C	SC_37C	ACAGGGCAGCTCCCG	-0.0172227	0.00635865	10	0.0141836	0.0291366	-0.0292694	0.0120467	-0.0273149	0.0124093	5	-0.0170951	0.00139521	5
G2640_P1F05-SC_37C	G2640_P1F05	2640	P1F05	P1_SC_37C	SC_37C	ACAGTTGACGGACAG	-0.000393911	0.00132927	10	0.16568	0.229703	0.00149213	-0.00188604	-0.00199507	0.00182654	5	0.00101529	0.00171356	5
G2640_P1F05-SC_37C	G2640_P1F05	2640	P1F05	P1_SC_37C	SC_37C	ACCACCGGTCCTGCC	0.000514305	0.00228353	9	0.251941	0.326524	-0.00133408	0.00184839	0.00337614	0.00318596	5	-0.00195186	0.00295753	4
G2640_P1F05-SC_37C	G2640_P1F05	2640	P1F05	P1_SC_37C	SC_37C	AGAACATCATCTACA	-0.162962	0.0168461	4	0.0132421	0.0275158			-0.189784	0.0299473	2	-0.160593	0.00890003	2
G2640_P1F05-SC_37C	G2640_P1F05	2640	P1F05	P1_SC_37C	SC_37C	AGAAGACGACGATGA	-0.0632938	0.00455943	10	1.34037e-05	9.58492e-05	-0.0269064	-0.0363874	-0.061416	0.00531378	5	-0.0672787	0.00774072	5
G2640_P1F05-SC_37C	G2640_P1F05	2640	P1F05	P1_SC_37C	SC_37C	AGATTCATCCCATGG	0.000220474	0.00144474	10	0.398875	0.478642	-0.00105522	0.00127569	0.00147304	0.00227719	5	-0.000535706	0.00176934	5
G2640_P1F05-SC_37C	G2640_P1F05	2640	P1F05	P1_SC_37C	SC_37C	AGTGTATGATAATAT	-0.0290938	0.0111137	10	1.45176e-11	8.24074e-09	-0.01028	-0.0188138	-0.0743869	0.00228387	5	-0.0171252	0.00117402	5
G2640_P1F05-SC_37C	G2640_P1F05	2640	P1F05	P1_SC_37C	SC_37C	AGTGTTAATCAGACC	-0.0323353	0.00862459	6	0.0336435	0.0598453	-0.0454435	0.0131082	-0.0370458	0.00853992	3	-0.0192931	0.01421	3
G2640_P1F05-SC_37C	G2640_P1F05	2640	P1F05	P1_SC_37C	SC_37C	AGTTTATAAAAAATT	0.0215556	0.0058591	7	5.25475e-05	0.000283861	0.0647237	-0.0431681	0.0234975	0.00167949	5	-0.0040037	0.0060931	2
G2640_P1F05-SC_37C	G2640_P1F05	2640	P1F05	P1_SC_37C	SC_37C	ATAATTTTCATCCAC	-0.0297826	0.00229023	5	0.0013529	0.00407087	-0.0111715	-0.0186111	-0.0305339	0.00301393	4	-0.0274652	0.00529302	1
G2640_P1F05-SC_37C	G2640_P1F05	2640	P1F05	P1_SC_37C	SC_37C	ATAGAGCGGCGTTGA	-0.00703819	0.00346066	8	0.913472	0.933633	-0.011058	0.00401985	0.000375651	0.0041185	5	-0.0098646	0.00254294	3
G2640_P1F05-SC_37C	G2640_P1F05	2640	P1F05	P1_SC_37C	SC_37C	ATAGTCGATTAAGAT	-0.0140782	0.0404814	4	0.779743	0.826098	-0.0514128	0.0373346	-0.0138612	0.00323807	2	-0.0919218	0.0613242	2
G2640_P1F05-SC_37C	G2640_P1F05	2640	P1F05	P1_SC_37C	SC_37C	ATATTGAGTAAGTAC	-0.00659423	0.00323696	10	0.592924	0.663884	0.00108997	-0.0076842	-0.00247064	0.00600798	5	-0.00729561	0.00247781	5
G2640_P1F05-SC_37C	G2640_P1F05	2640	P1F05	P1_SC_37C	SC_37C	ATCGTTGGCATTTGG	-0.125407	0.0161266	9	2.13818e-06	2.23114e-05	-0.105906	-0.0195017	-0.158444	0.0109869	5	-0.0785154	0.0130898	4
G2640_P1F05-SC_37C	G2640_P1F05	2640	P1F05	P1_SC_37C	SC_37C	ATGAAGTTCATAATG	-0.00283604	0.00175029	3	0.782169	0.828175	0.0266474	-0.0294834	-0.00110346	0.00343977	1	-0.00362913	0.00232725	2
G2640_P1F05-SC_37C	G2640_P1F05	2640	P1F05	P1_SC_37C	SC_37C	ATGGCGATGGTCTTG	-0.00208066	0.00191592	6	0.430837	0.511137	-0.00278687	0.000706214	-0.00203955	0.00171379	4	-0.00263818	0.00631166	2
G2640_P1F05-SC_37C	G2640_P1F05	2640	P1F05	P1_SC_37C	SC_37C	ATTAATACTTTGCAG	-0.0836272	0.00739519	4	0.0151852	0.0309139	-0.0590057	-0.0246215	-0.0831457	0.0104715	3	-0.0850447	0.0179687	1
G2640_P1F05-SC_37C	G2640_P1F05	2640	P1F05	P1_SC_37C	SC_37C	ATTATCAAGTGCCAG	-0.0548286	0.00825479	10	1.5448e-06	1.7321e-05	-0.0673298	0.0125012	-0.0832591	0.00853607	5	-0.0476702	0.00428322	5
G2640_P1F05-SC_37C	G2640_P1F05	2640	P1F05	P1_SC_37C	SC_37C	CAAGGATCCCCGTAG	-0.0133618	0.00467412	8	0.0273504	0.0503554	-0.0256483	0.0122865	-0.0168328	0.00589706	5	-0.00730779	0.00778807	3
G2640_P1F05-SC_37C	G2640_P1F05	2640	P1F05	P1_SC_37C	SC_37C	CAAGTTCGGCGAAAT	-0.00297135	0.00400591	6	0.838451	0.874316	-0.00314285	0.000171495	-0.000745695	0.00218614	3	-0.0130197	0.00464513	3
G2640_P1F05-SC_37C	G2640_P1F05	2640	P1F05	P1_SC_37C	SC_37C	CAATCTTGAATTGAT	0.010612	0.00261724	10	0.00101734	0.00322223	0.0141933	-0.00358125	0.014541	0.00289806	5	0.00538052	0.00334412	5
G2640_P1F05-SC_37C	G2640_P1F05	2640	P1F05	P1_SC_37C	SC_37C	CAATTTCAACGTTGT	-0.0474345	0.0148125	8	0.00841184	0.0188987	-0.0641989	0.0167643	-0.0417164	0.00362111	3	-0.0922423	0.0101366	5
G2640_P1F05-SC_37C	G2640_P1F05	2640	P1F05	P1_SC_37C	SC_37C	CATATGCATTCCTTG	-0.00586631	0.0041113	10	0.000703839	0.00238124	-0.00930645	0.00344014	0.00966672	0.00268427	5	-0.01067	0.00149274	5
G2640_P1F05-SC_37C	G2640_P1F05	2640	P1F05	P1_SC_37C	SC_37C	CATCAATGAGGCAGT	-0.0855291	0.0212092	6	0.0172749	0.0344293	-0.170366	0.0848369	-0.116129	0.0381683	3	-0.0791654	0.017406	3
G2640_P1F05-SC_37C	G2640_P1F05	2640	P1F05	P1_SC_37C	SC_37C	CATTGTCGGACGCTT	0.0121677	0.00742311	4	0.177444	0.24309	0.0853687	-0.073201	0.0113405	0.00176528	2	0.0284138	0.00782351	2
G2640_P1F05-SC_37C	G2640_P1F05	2640	P1F05	P1_SC_37C	SC_37C	CATTTATGGCTATCT	-0.055951	0.00525858	9	0.000190366	0.000807969	-0.0900852	0.0341342	-0.0516184	0.00918638	5	-0.0568242	0.00412408	4
G2640_P1F05-SC_37C	G2640_P1F05	2640	P1F05	P1_SC_37C	SC_37C	CCAACACAGGCTTCG	-0.0159296	0.00612095	10	0.352382	0.431158	0.00488293	-0.0208125	0.00502316	0.00679387	5	-0.0197693	0.00290836	5
G2640_P1F05-SC_37C	G2640_P1F05	2640	P1F05	P1_SC_37C	SC_37C	CCAAGACCGTGTAAA	-0.231988	0.0174788	7	2.86792e-05	0.000175126	-0.232802	0.000814043	-0.233851	0.00551245	4	-0.18184	0.0285981	3
G2640_P1F05-SC_37C	G2640_P1F05	2640	P1F05	P1_SC_37C	SC_37C	CCAGGATGTACCGCC	-0.106143	0.00438449	8	1.72947e-06	1.89481e-05	-0.104767	-0.00137651	-0.104679	0.00544572	5	-0.109761	0.00855963	3
G2640_P1F05-SC_37C	G2640_P1F05	2640	P1F05	P1_SC_37C	SC_37C	CCGTTAGTATCGCTA	-0.00482302	0.0061044	8	0.381999	0.461907	-0.019524	0.0147009	-0.00858372	0.0126292	4	-0.00461071	0.00300072	4
G2640_P1F05-SC_37C	G2640_P1F05	2640	P1F05	P1_SC_37C	SC_37C	CGAACAGAAACACAA	-0.0631535	0.0116939	6	0.00201674	0.00564677	-0.0509589	-0.0121946	-0.0767656	0.00886523	3	-0.0364235	0.012423	3
G2640_P1F05-SC_37C	G2640_P1F05	2640	P1F05	P1_SC_37C	SC_37C	CGAATGCCATACAAA	-0.0091755	0.00699462	7	0.0376149	0.0656995	-0.0187919	0.00961644	-0.0194999	0.00748813	5	0.00276213	0.00805194	2
G2640_P1F05-SC_37C	G2640_P1F05	2640	P1F05	P1_SC_37C	SC_37C	CGATGATGATGATGA	-0.00433374	0.0023042	9	0.00196391	0.00552368	-0.00559316	0.00125942	-0.00939883	0.00250854	5	-0.000284688	0.00224287	4
G2640_P1F05-SC_37C	G2640_P1F05	2640	P1F05	P1_SC_37C	SC_37C	CGCGATCAATCCTCT	-0.0341866	0.00812238	6	0.0494602	0.0829241	-0.0319146	-0.00227196	-0.0303533	0.0126253	4	-0.0343431	0.00255144	2
G2640_P1F05-SC_37C	G2640_P1F05	2640	P1F05	P1_SC_37C	SC_37C	CTAAGCAGTCTTCTC	-0.0743395	0.0105337	10	4.39635e-08	1.27361e-06	-0.133331	0.0589911	-0.115387	0.00792062	5	-0.0691126	0.00282644	5
G2640_P1F05-SC_37C	G2640_P1F05	2640	P1F05	P1_SC_37C	SC_37C	CTAAGTGTGAAGGAG	-0.0548691	0.00641894	3	0.0519396	0.0863661	-0.131283	0.0764143	-0.0484879	0.00423715	2	-0.0662628	0.00566179	1
G2640_P1F05-SC_37C	G2640_P1F05	2640	P1F05	P1_SC_37C	SC_37C	CTACTTACAACGGAA	0.00684173	0.00247735	10	2.03142e-08	7.61191e-07	2.16745e-05	0.00682006	0.0149859	0.00152256	5	0.00166388	0.00121402	5
G2640_P1F05-SC_37C	G2640_P1F05	2640	P1F05	P1_SC_37C	SC_37C	CTAGTTGTATAGCCA	-0.0366976	0.00787539	9	0.00419728	0.0104383	-0.0228617	-0.0138359	-0.0483192	0.0137774	4	-0.0320334	0.00872814	5
G2640_P1F05-SC_37C	G2640_P1F05	2640	P1F05	P1_SC_37C	SC_37C	CTATCAAGGCTTAAT	0.0119088	0.00281191	7	0.0237405	0.0447813	0.0109081	0.0010007	0.0124174	0.00503391	4	0.0118225	0.0020734	3
G2640_P1F05-SC_37C	G2640_P1F05	2640	P1F05	P1_SC_37C	SC_37C	CTCGCTAATACTCCT	-0.0199213	0.00247219	10	2.62711e-05	0.000163303	-0.0375804	0.0176591	-0.0133665	0.0020187	5	-0.0257578	0.00190489	5
G2640_P1F05-SC_37C	G2640_P1F05	2640	P1F05	P1_SC_37C	SC_37C	CTCTTGAGAATACTT	-0.0790159	0.0135216	10	0.00388019	0.00977463	-0.0948968	0.0158809	-0.0811578	0.0251056	5	-0.0783679	0.013808	5
G2640_P1F05-SC_37C	G2640_P1F05	2640	P1F05	P1_SC_37C	SC_37C	CTGATTTGTGCTGTC	0.00904039	0.00391585	8	0.0621438	0.100405	0.0375917	-0.0285514	0.011677	0.00638111	5	0.00887152	0.00161487	3
G2640_P1F05-SC_37C	G2640_P1F05	2640	P1F05	P1_SC_37C	SC_37C	CTTGATCAATCAAAA	-0.0803487	0.0100126	10	1.30738e-05	9.40815e-05	-0.0824445	0.00209582	-0.0733728	0.0045101	5	-0.115825	0.0101708	5
G2640_P1F05-SC_37C	G2640_P1F05	2640	P1F05	P1_SC_37C	SC_37C	CTTGCAAGTGTAATT	0.00586912	0.00284349	9	0.0551797	0.0907424	0.000560442	0.00530867	0.00697386	0.00196819	5	-0.00119022	0.00497528	4
G2640_P1F05-SC_37C	G2640_P1F05	2640	P1F05	P1_SC_37C	SC_37C	GAACTCAGGTTCCAT	-0.0373937	0.00367016	6	0.000951603	0.0030442	-0.0442945	0.00690074	-0.0378414	0.00458861	5	-0.0353799	0.00973262	1
G2640_P1F05-SC_37C	G2640_P1F05	2640	P1F05	P1_SC_37C	SC_37C	GAGAATGAAGGACAG	-0.0179604	0.00181986	10	4.05028e-06	3.67743e-05	0.00446468	-0.0224251	-0.0217945	0.00311601	5	-0.0175881	0.00097109	5
G2640_P1F05-SC_37C	G2640_P1F05	2640	P1F05	P1_SC_37C	SC_37C	GAGTGCTTCAAAGTT	0.0119511	0.00360995	10	0.0254299	0.0474034	0.0186933	-0.00674223	0.0136448	0.00380154	5	0.00750005	0.00616276	5
G2640_P1F05-SC_37C	G2640_P1F05	2640	P1F05	P1_SC_37C	SC_37C	GCAAGAAAGAAACCC	-0.0142129	0.0121461	5	0.0464497	0.0785534	-0.0257965	0.0115836	0.0144358	0.00525206	3	-0.0264361	0.0034306	2
G2640_P1F05-SC_37C	G2640_P1F05	2640	P1F05	P1_SC_37C	SC_37C	GCCCTCGAAACCTAT	-0.0637181	0.0160352	6	0.191586	0.25913	-0.0598668	-0.00385127	-0.0316205	0.0171126	2	-0.0881314	0.0149243	4
G2640_P1F05-SC_37C	G2640_P1F05	2640	P1F05	P1_SC_37C	SC_37C	GCTGCTTATGAGGAT	-0.0034902	0.00124268	10	0.0950223	0.144002	-0.0056472	0.002157	-0.00211591	0.00159126	5	-0.00501991	0.00167882	5
G2640_P1F05-SC_37C	G2640_P1F05	2640	P1F05	P1_SC_37C	SC_37C	GGTTGCCCAGAAGTA	0.0128065	0.00441902	10	5.23652e-05	0.000283309	-0.0194968	0.0323033	0.0239104	0.00323866	5	0.00099719	0.00333994	5
G2640_P1F05-SC_37C	G2640_P1F05	2640	P1F05	P1_SC_37C	SC_37C	GTAATCTGACTCTAG	-0.0251375	0.0139608	7	0.72378	0.778595	0.0077402	-0.0328777	-0.00665591	0.014787	3	-0.0495166	0.0169831	4
G2640_P1F05-SC_37C	G2640_P1F05	2640	P1F05	P1_SC_37C	SC_37C	GTACAAGAAATTTTG	-0.0221227	0.00897177	7	0.0230926	0.0438046	-0.0434344	0.0213117	-0.0363973	0.0144509	4	-0.0214705	0.00308871	3
G2640_P1F05-SC_37C	G2640_P1F05	2640	P1F05	P1_SC_37C	SC_37C	GTCACCGGCACTAAC	-0.0134624	0.00368698	5	0.0345869	0.0611915	-0.0259069	0.0124446	-0.0172956	0.00535606	3	-0.0107531	0.00450291	2
G2640_P1F05-SC_37C	G2640_P1F05	2640	P1F05	P1_SC_37C	SC_37C	GTGTGATTACTAAAT	-0.0226123	0.00981326	9	0.197438	0.265718	-0.0108598	-0.0117526	-0.0222006	0.00587082	4	-0.0264526	0.0179311	5
G2640_P1F05-SC_37C	G2640_P1F05	2640	P1F05	P1_SC_37C	SC_37C	GTTAAATCAACAGTT	-0.0150618	0.00421681	8	1.91195e-05	0.000127064	-0.0412742	0.0262124	-0.0273006	0.00301508	5	-0.0108778	0.00176289	3
G2640_P1F05-SC_37C	G2640_P1F05	2640	P1F05	P1_SC_37C	SC_37C	GTTCAGCTTTGATCG	-0.152444	0.00556312	10	6.40792e-08	1.6754e-06	-0.124119	-0.0283249	-0.154803	0.0112644	5	-0.15225	0.00323079	5
G2640_P1F05-SC_37C	G2640_P1F05	2640	P1F05	P1_SC_37C	SC_37C	GTTGAACTGGTTGTT	-0.00208116	0.00878709	8	0.00140262	0.00419496	-0.0331275	0.0310464	-0.0284783	0.00635233	5	0.000307114	0.00191072	3
G2640_P1F05-SC_37C	G2640_P1F05	2640	P1F05	P1_SC_37C	SC_37C	GTTGGGCGCTTAAAG	0.000756822	0.00184077	10	0.488809	0.566585	-0.00339134	0.00414816	-0.00163949	0.00307717	5	0.0016666	0.00189605	5
G2640_P1F05-SC_37C	G2640_P1F05	2640	P1F05	P1_SC_37C	SC_37C	GTTTAGCTTCCGTTG	-0.000817393	0.00464259	9	0.41534	0.495284	0.000432998	-0.00125039	0.00321835	0.00286239	5	-0.0160851	0.00556742	4
G2640_P1F05-SC_37C	G2640_P1F05	2640	P1F05	P1_SC_37C	SC_37C	GTTTGTTTTGGGAAA	-0.0924927	0.00582868	10	3.27575e-06	3.12211e-05	-0.140287	0.0477947	-0.0782718	0.00876971	5	-0.0963898	0.00459084	5
G2640_P1F05-SC_37C	G2640_P1F05	2640	P1F05	P1_SC_37C	SC_37C	TAACCTCGCGCTGAG	0.0180887	0.0043132	10	0.0010697	0.00335563	0.0247705	-0.00668172	0.0194134	0.00168837	5	0.00400597	0.00550499	5
G2640_P1F05-SC_37C	G2640_P1F05	2640	P1F05	P1_SC_37C	SC_37C	TAATATTGTTTTGCG	-0.0779337	0.0135373	9	0.00876008	0.0195739	-0.0703753	-0.00755836	-0.0779502	0.0320958	4	-0.077933	0.00639452	5
G2640_P1F05-SC_37C	G2640_P1F05	2640	P1F05	P1_SC_37C	SC_37C	TAGACGGACATCTTC	0.0162019	0.00268378	8	1.91185e-05	0.000127064	0.0214085	-0.00520658	0.0214656	0.00227709	5	0.00965505	0.00253953	3
G2640_P1F05-SC_37C	G2640_P1F05	2640	P1F05	P1_SC_37C	SC_37C	TATATTGAACTTTAC	0.00240728	0.00148283	9	0.0667385	0.106612	0.0115448	-0.00913757	0.00357891	0.00233742	5	0.00172594	0.00178248	4
G2640_P1F05-SC_37C	G2640_P1F05	2640	P1F05	P1_SC_37C	SC_37C	TATGCCCTTCTTCTG	0.00676693	0.0029062	10	0.0231516	0.0438831	0.00616433	0.000602597	0.00807857	0.00162398	5	-0.00161185	0.00410454	5
G2640_P1F05-SC_37C	G2640_P1F05	2640	P1F05	P1_SC_37C	SC_37C	TCAAAACGGAGTGTT	-0.00197248	0.00133588	10	0.688248	0.749628	-0.00120033	-0.000772148	-0.000595596	0.00224659	5	-0.00249104	0.00137872	5
G2640_P1F05-SC_37C	G2640_P1F05	2640	P1F05	P1_SC_37C	SC_37C	TCAAAGCATGAAAAA	-0.0409349	0.00158834	10	2.81158e-08	9.38979e-07	-0.086374	0.0454391	-0.0414203	0.00216639	5	-0.0403181	0.00244215	5
G2640_P1F05-SC_37C	G2640_P1F05	2640	P1F05	P1_SC_37C	SC_37C	TCAAATGATGAGGAT	0.00920837	0.00180039	10	0.0180296	0.0356169	0.0191963	-0.00998795	0.00535836	0.00249569	5	0.0111605	0.00177709	5
G2640_P1F05-SC_37C	G2640_P1F05	2640	P1F05	P1_SC_37C	SC_37C	TCAACAACCTATGCA	0.0159997	0.00120891	9	9.57617e-07	1.20984e-05	0.0238632	-0.00786351	0.0171224	0.00174367	5	0.015014	0.00163386	4
G2640_P1F05-SC_37C	G2640_P1F05	2640	P1F05	P1_SC_37C	SC_37C	TCATAGGTATCTCGC	-4.11587e-05	0.00121824	10	0.15247	0.214222	-0.00351693	0.00347578	0.0017251	0.00193214	5	-0.000750057	0.00122406	5
G2640_P1F05-SC_37C	G2640_P1F05	2640	P1F05	P1_SC_37C	SC_37C	TCGAAAGCACAGTAG	-0.0927027	0.0108391	10	0.000618176	0.0021383	-0.135006	0.0423035	-0.0875302	0.0208978	5	-0.0937034	0.00919181	5
G2640_P1F05-SC_37C	G2640_P1F05	2640	P1F05	P1_SC_37C	SC_37C	TCGATAGAATTTACT	-0.0223352	0.020616	10	0.0484006	0.0814105	-0.0242833	0.00194807	-0.0186865	0.00233864	5	-0.106641	0.0112415	5
G2640_P1F05-SC_37C	G2640_P1F05	2640	P1F05	P1_SC_37C	SC_37C	TCTTGGAGGTGAATG	-0.0109739	0.0134998	10	0.481378	0.55943	-0.0830805	0.0721066	-0.00564343	0.00331732	5	-0.063615	0.0104247	5
G2640_P1F05-SC_37C	G2640_P1F05	2640	P1F05	P1_SC_37C	SC_37C	TGATCATCACGGGAC	-0.00617098	0.00291371	10	0.244675	0.318553	-0.0208832	0.0147123	-0.00522124	0.00572887	5	-0.00630445	0.00214765	5
G2640_P1F05-SC_37C	G2640_P1F05	2640	P1F05	P1_SC_37C	SC_37C	TGGAGTCTTTGTTGA	-0.0304066	0.00289562	9	1.21782e-05	8.90278e-05	-0.063193	0.0327864	-0.0241268	0.00225596	4	-0.0375366	0.0024038	5
G2640_P1F05-SC_37C	G2640_P1F05	2640	P1F05	P1_SC_37C	SC_37C	TTAATTAGAGGTATG	-0.023544	0.00419671	4	0.0964915	0.145802	-0.0312409	0.00769691	-0.0279789	0.00950265	1	-0.022072	0.00547472	3
G2640_P1F05-SC_37C	G2640_P1F05	2640	P1F05	P1_SC_37C	SC_37C	TTAATTGCACTTATG	-0.0402749	0.00706109	7	0.00122844	0.00377098	-0.072662	0.0323871	-0.0537162	0.0105478	4	-0.0395944	0.00237331	3
G2640_P1F05-SC_37C	G2640_P1F05	2640	P1F05	P1_SC_37C	SC_37C	TTAGTCTTTCCATCA	-0.134723	0.0102879	10	5.16798e-09	2.96671e-07	-0.204752	0.0700289	-0.171041	0.00795723	5	-0.119694	0.00511882	5
G2640_P1F05-SC_37C	G2640_P1F05	2640	P1F05	P1_SC_37C	SC_37C	TTATATTTATTTGCT	-0.000846412	0.00148139	10	0.134149	0.192036	-0.0146704	0.013824	-0.00264587	0.00204668	5	0.000744282	0.0019243	5
G2640_P1F05-SC_37C	G2640_P1F05	2640	P1F05	P1_SC_37C	SC_37C	TTTAACTCACCGTAA	-0.00904829	0.00529733	9	0.177934	0.243574	-0.0171085	0.00806022	-0.00844728	0.00193561	5	-0.0236311	0.00953447	4
G2640_P1F05-SC_37C	G2640_P1F05	2640	P1F05	P1_SC_37C	SC_37C	TTTATAAATCAATAG	0.0017171	0.000947676	10	0.0711315	0.11282	0.00352976	-0.00181266	0.00105191	0.00150185	5	0.00204362	0.00105222	5
G2640_P1F05-SC_37C	G2640_P1F05	2640	P1F05	P1_SC_37C	SC_37C	TTTTGCATTTAGGCG	-0.0211324	0.00380923	10	0.000407828	0.001512	-0.0117231	-0.00940931	-0.00927207	0.00211398	5	-0.0304309	0.0018718	5
G2640_P1F05-SC_37C	G2640_P1F05	2640	P1F05	P1_SC_37C	SC_37C	AATGATACCATTTTT	-0.117748	0.00898627	5	0.000192948	0.000815869						-0.117748	0.00898627	5
G2640_P1F05-SC_37C	G2640_P1F05	2640	P1F05	P1_SC_37C	SC_37C	GGTGGAAGTAGCAGT	-0.00406814	0.00231059	3	0.202068	0.271041	0.00243518	-0.00650332				-0.00406814	0.00231059	3
G2640_P1F05-SC_37C	G2640_P1F05	2640	P1F05	P1_SC_37C	SC_37C	TCAGAGCATTGGCCT	-0.194198	0.0412176	3	0.0422017	0.0723714						-0.194198	0.0412176	3
G1410_P3D03-SC_37C	G1410_P3D03	1410	P3D03	P3_SC_37C	SC_37C	AAAACATTATCAAAG	-0.000813189	0.00125375	10	0.228172	0.300373	-0.00194739	0.0011342	-0.00208938	0.0016878	5	0.000623103	0.00179054	5
G1410_P3D03-SC_37C	G1410_P3D03	1410	P3D03	P3_SC_37C	SC_37C	AAAAGAAAAATGTAT	-0.00181361	0.00146347	10	0.444984	0.52512	0.0167521	-0.0185657	0.0012658	0.00184345	5	-0.00407455	0.00157958	5
G1410_P3D03-SC_37C	G1410_P3D03	1410	P3D03	P3_SC_37C	SC_37C	AAAAGCGACATTTCT	-0.0147366	0.00221018	10	3.15925e-05	0.000189559	-0.0396226	0.024886	-0.0202665	0.00295101	5	-0.0122249	0.00198883	5
G1410_P3D03-SC_37C	G1410_P3D03	1410	P3D03	P3_SC_37C	SC_37C	AATGATACCATTTTT	-0.175442	0.0295536	7	0.00602627	0.0141747			-0.170449	0.0331612	5	-0.204633	0.0801826	2
G1410_P3D03-SC_37C	G1410_P3D03	1410	P3D03	P3_SC_37C	SC_37C	ACAACCTACCTGCTA	0.00164335	0.0010284	10	0.266164	0.341603	-0.00239255	0.0040359	0.00163338	0.00076191	5	0.00171346	0.0020203	5
G1410_P3D03-SC_37C	G1410_P3D03	1410	P3D03	P3_SC_37C	SC_37C	ACAAGTTTTACAGTT	-0.0582542	0.00364374	9	4.24645e-06	3.82212e-05	-0.0260819	-0.0321723	-0.0608581	0.00430169	5	-0.0530762	0.00606608	4
G1410_P3D03-SC_37C	G1410_P3D03	1410	P3D03	P3_SC_37C	SC_37C	ACAGGGCAGCTCCCG	-0.0323383	0.00413634	10	0.000878669	0.00285041	-0.0397814	0.00744313	-0.0310774	0.00454826	5	-0.03558	0.00729278	5
G1410_P3D03-SC_37C	G1410_P3D03	1410	P3D03	P3_SC_37C	SC_37C	ACAGTTGACGGACAG	-0.00310761	0.00108064	10	0.00544434	0.0130023	-0.00517114	0.00206353	-0.00460668	0.00136252	5	-0.00144944	0.001433	5
G1410_P3D03-SC_37C	G1410_P3D03	1410	P3D03	P3_SC_37C	SC_37C	ACCACCGGTCCTGCC	-0.00330238	0.00192921	10	0.279151	0.35567	-0.000431459	-0.00287092	-0.00318488	0.00103532	5	-0.00493672	0.00386127	5
G1410_P3D03-SC_37C	G1410_P3D03	1410	P3D03	P3_SC_37C	SC_37C	AGAACATCATCTACA	-0.138227	0.0172236	5	0.00130581	0.00396066	-0.223556	0.085329	-0.138227	0.0172236	5
G1410_P3D03-SC_37C	G1410_P3D03	1410	P3D03	P3_SC_37C	SC_37C	AGAAGACGACGATGA	-0.0770725	0.00142319	10	1.05666e-10	2.63257e-08	-0.0663318	-0.0107407	-0.0774509	0.0010271	5	-0.0747237	0.00255907	5
G1410_P3D03-SC_37C	G1410_P3D03	1410	P3D03	P3_SC_37C	SC_37C	AGATTCATCCCATGG	-0.000411513	0.00207264	8	0.983444	0.98693	0.0346566	-0.0350681	5.26423e-05	0.00160833	5	-0.00445567	0.00474742	3
G1410_P3D03-SC_37C	G1410_P3D03	1410	P3D03	P3_SC_37C	SC_37C	AGTGTATGATAATAT	-0.0262119	0.000817991	10	2.42399e-09	1.93562e-07	-0.0233157	-0.00289617	-0.0257425	0.000869343	5	-0.027326	0.00133939	5
G1410_P3D03-SC_37C	G1410_P3D03	1410	P3D03	P3_SC_37C	SC_37C	AGTGTTAATCAGACC	-0.0065514	0.00259605	8	0.120895	0.176181	-0.0221393	0.0155879	-0.0062783	0.00315715	5	-0.00733848	0.00535981	3
G1410_P3D03-SC_37C	G1410_P3D03	1410	P3D03	P3_SC_37C	SC_37C	AGTTTATAAAAAATT	-0.0114514	0.00226187	10	0.0143505	0.0294406	0.0188846	-0.0303361	-0.00805046	0.00243559	5	-0.0162442	0.00289134	5
G1410_P3D03-SC_37C	G1410_P3D03	1410	P3D03	P3_SC_37C	SC_37C	ATAATTTTCATCCAC	-0.0484801	0.0281261	4	0.403716	0.48347	-0.104223	0.0557432	-0.0440159	0.0199744	2	-0.0833173	0.0557988	2
G1410_P3D03-SC_37C	G1410_P3D03	1410	P3D03	P3_SC_37C	SC_37C	ATAGAGCGGCGTTGA	-0.0144241	0.00576516	10	0.104654	0.155848	-0.0178801	0.003456	-0.0143552	0.000916999	5	-0.0245156	0.0110981	5
G1410_P3D03-SC_37C	G1410_P3D03	1410	P3D03	P3_SC_37C	SC_37C	ATAGTCGATTAAGAT	-0.0866248	0.0161278	3	0.032927	0.0587975	-0.0361705	-0.0504542	-0.0866248	0.0161278	3
G1410_P3D03-SC_37C	G1410_P3D03	1410	P3D03	P3_SC_37C	SC_37C	ATATTGAGTAAGTAC	-0.00903554	0.00119313	10	0.00027974	0.00110591	-0.0106469	0.00161138	-0.00987918	0.00220994	5	-0.00882186	0.00111219	5
G1410_P3D03-SC_37C	G1410_P3D03	1410	P3D03	P3_SC_37C	SC_37C	ATCGTTGGCATTTGG	-0.0763006	0.00578687	9	3.87781e-05	0.000223742	-0.0437201	-0.0325805	-0.0752552	0.00767983	5	-0.0780881	0.0100423	4
G1410_P3D03-SC_37C	G1410_P3D03	1410	P3D03	P3_SC_37C	SC_37C	ATGAAGTTCATAATG	0.00498569	0.0126364	3	0.967711	0.974281	0.0100138	-0.00502814	0.00105507	0.0207908	2	0.0128481	0.0294049	1
G1410_P3D03-SC_37C	G1410_P3D03	1410	P3D03	P3_SC_37C	SC_37C	ATGGCGATGGTCTTG	-0.00863	0.00337391	9	0.287697	0.364619	-0.007843	-0.000787004	-0.00484154	0.00415091	5	-0.0139145	0.00490244	4
G1410_P3D03-SC_37C	G1410_P3D03	1410	P3D03	P3_SC_37C	SC_37C	ATTAATACTTTGCAG	-0.141914	0.0371518	4	0.0315687	0.0567217	-0.105046	-0.0368683	-0.141914	0.0371518	4
G1410_P3D03-SC_37C	G1410_P3D03	1410	P3D03	P3_SC_37C	SC_37C	ATTATCAAGTGCCAG	-0.112683	0.00715451	10	5.65624e-06	4.8218e-05	-0.104003	-0.0086801	-0.113032	0.0126908	5	-0.112533	0.00831581	5
G1410_P3D03-SC_37C	G1410_P3D03	1410	P3D03	P3_SC_37C	SC_37C	CAAGGATCCCCGTAG	-0.0174194	0.00474973	7	0.0241963	0.0454894	-0.0174624	4.29575e-05	-0.0207857	0.00672724	4	-0.0135531	0.00720969	3
G1410_P3D03-SC_37C	G1410_P3D03	1410	P3D03	P3_SC_37C	SC_37C	CAAGTTCGGCGAAAT	0.000172922	0.00442053	8	0.756202	0.805817	-0.00943237	0.00960529	0.00158152	0.00231883	4	-0.0110672	0.00655028	4
G1410_P3D03-SC_37C	G1410_P3D03	1410	P3D03	P3_SC_37C	SC_37C	CAATCTTGAATTGAT	-0.0093612	0.00330001	10	0.142455	0.202321	-0.000313742	-0.00904746	-0.0071894	0.00335116	5	-0.0149239	0.00536323	5
G1410_P3D03-SC_37C	G1410_P3D03	1410	P3D03	P3_SC_37C	SC_37C	CAATTTCAACGTTGT	-0.0702279	0.00701773	7	0.000509405	0.00182346	-0.0701227	-0.000105197	-0.0718584	0.0101124	5	-0.0701722	0.00186973	2
G1410_P3D03-SC_37C	G1410_P3D03	1410	P3D03	P3_SC_37C	SC_37C	CATATGCATTCCTTG	-0.00444383	0.00183179	10	0.000423929	0.00156424	-0.00684678	0.00240295	-0.00961458	0.00206669	5	-0.00174592	0.00149283	5
G1410_P3D03-SC_37C	G1410_P3D03	1410	P3D03	P3_SC_37C	SC_37C	CATCAATGAGGCAGT	-0.208161	0.0350498	7	0.0120493	0.0255359	-0.195177	-0.0129837	-0.10946	0.0316441	3	-0.258687	0.0226407	4
G1410_P3D03-SC_37C	G1410_P3D03	1410	P3D03	P3_SC_37C	SC_37C	CATTGTCGGACGCTT	-0.0397181	0.00675185	4	0.0896008	0.137103			-0.034066	0.014589	2	-0.0404552	0.00526864	2
G1410_P3D03-SC_37C	G1410_P3D03	1410	P3D03	P3_SC_37C	SC_37C	CATTTATGGCTATCT	-0.0532734	0.00455772	7	0.000119661	0.000551724	-0.0957317	0.0424584	-0.0544806	0.00416775	5	-0.0428841	0.0122264	2
G1410_P3D03-SC_37C	G1410_P3D03	1410	P3D03	P3_SC_37C	SC_37C	CCAACACAGGCTTCG	-0.0492872	0.00518112	10	1.84566e-05	0.000123278	-0.0257215	-0.0235657	-0.0602263	0.00900363	5	-0.0480288	0.00305372	5
G1410_P3D03-SC_37C	G1410_P3D03	1410	P3D03	P3_SC_37C	SC_37C	CCAAGACCGTGTAAA	-0.164585	0.0197117	8	0.00100081	0.00317897	-0.233836	0.0692517	-0.159341	0.0276355	5	-0.171672	0.0321271	3
G1410_P3D03-SC_37C	G1410_P3D03	1410	P3D03	P3_SC_37C	SC_37C	CCAGGATGTACCGCC	-0.0817781	0.00442302	8	3.20229e-06	3.06853e-05	-0.0966343	0.0148562	-0.0880227	0.00613406	5	-0.0786115	0.00436812	3
G1410_P3D03-SC_37C	G1410_P3D03	1410	P3D03	P3_SC_37C	SC_37C	CCGTTAGTATCGCTA	0.00284369	0.00327126	6	0.328909	0.407319	-0.00985291	0.0126966	0.00407652	0.00370572	5	-0.00326094	0.00824613	1
G1410_P3D03-SC_37C	G1410_P3D03	1410	P3D03	P3_SC_37C	SC_37C	CGAACAGAAACACAA	-0.0640082	0.02242	5	0.0133314	0.027683	-0.0491679	-0.0148403	-0.108572	0.0242244	3	-0.0524341	0.0123454	2
G1410_P3D03-SC_37C	G1410_P3D03	1410	P3D03	P3_SC_37C	SC_37C	CGAATGCCATACAAA	-0.00588652	0.00173189	9	0.041468	0.0712703	-0.0134127	0.00752622	-0.00595057	0.00274021	5	-0.005842	0.00228457	4
G1410_P3D03-SC_37C	G1410_P3D03	1410	P3D03	P3_SC_37C	SC_37C	CGATGATGATGATGA	-0.00146501	0.00102174	10	0.330964	0.409456	-0.00514166	0.00367665	-0.00136949	0.000678525	5	-0.00228867	0.00199238	5
G1410_P3D03-SC_37C	G1410_P3D03	1410	P3D03	P3_SC_37C	SC_37C	CGCGATCAATCCTCT	-0.0756152	0.00976738	8	0.000632829	0.00218068	-0.0589946	-0.0166206	-0.054993	0.00920923	5	-0.0943587	0.00877974	3
G1410_P3D03-SC_37C	G1410_P3D03	1410	P3D03	P3_SC_37C	SC_37C	CTAAGCAGTCTTCTC	-0.196778	0.00516079	10	5.38492e-09	3.04486e-07	-0.147803	-0.0489754	-0.194618	0.00626142	5	-0.200916	0.00866622	5
G1410_P3D03-SC_37C	G1410_P3D03	1410	P3D03	P3_SC_37C	SC_37C	CTAAGTGTGAAGGAG	-0.036584	0.0147996	4	0.0179087	0.035439	-0.133364	0.0967804	-0.0702188	0.0134635	2	-0.0363751	0.00106111	2
G1410_P3D03-SC_37C	G1410_P3D03	1410	P3D03	P3_SC_37C	SC_37C	CTACTTACAACGGAA	0.00428231	0.00110628	10	0.0487353	0.081885	-0.000334256	0.00461656	0.00256928	0.0012031	5	0.00656446	0.00138865	5
G1410_P3D03-SC_37C	G1410_P3D03	1410	P3D03	P3_SC_37C	SC_37C	CTAGTTGTATAGCCA	-0.0557409	0.00583199	4	0.012713	0.026642	-0.0337863	-0.0219546	-0.0516775	0.00590548	3	-0.0679156	0.0102221	1
G1410_P3D03-SC_37C	G1410_P3D03	1410	P3D03	P3_SC_37C	SC_37C	CTATCAAGGCTTAAT	-0.0305836	0.00281179	10	0.000117528	0.000544257	-0.00951787	-0.0210658	-0.0279651	0.00462308	5	-0.0320375	0.00344477	5
G1410_P3D03-SC_37C	G1410_P3D03	1410	P3D03	P3_SC_37C	SC_37C	CTCGCTAATACTCCT	-0.00711931	0.00104399	10	5.19599e-06	4.51055e-05	-0.0144155	0.00729615	-0.00850952	0.000842404	5	-0.00420248	0.00122021	5
G1410_P3D03-SC_37C	G1410_P3D03	1410	P3D03	P3_SC_37C	SC_37C	CTCTTGAGAATACTT	-0.0598133	0.00476341	10	2.78625e-05	0.00017123	-0.100861	0.0410481	-0.0594433	0.00297398	5	-0.0635617	0.00946668	5
G1410_P3D03-SC_37C	G1410_P3D03	1410	P3D03	P3_SC_37C	SC_37C	CTGATTTGTGCTGTC	-0.0091821	0.00194426	5	0.0641963	0.103186	0.0084187	-0.0176008	-0.00603629	0.00255724	3	-0.0100407	0.00133595	2
G1410_P3D03-SC_37C	G1410_P3D03	1410	P3D03	P3_SC_37C	SC_37C	CTTGATCAATCAAAA	-0.103918	0.00438422	10	6.98831e-08	1.74107e-06	-0.0987804	-0.00513779	-0.10202	0.00311388	5	-0.11389	0.00713748	5
G1410_P3D03-SC_37C	G1410_P3D03	1410	P3D03	P3_SC_37C	SC_37C	CTTGCAAGTGTAATT	0.000399811	0.00705865	10	0.825755	0.864333	-0.00269507	0.00309488	0.00156836	0.00217207	5	-0.022208	0.00955388	5
G1410_P3D03-SC_37C	G1410_P3D03	1410	P3D03	P3_SC_37C	SC_37C	CTTTCTTGTGTATTT	-0.112556	0.0342552	8	0.0606748	0.0984021	-0.080249	-0.0323065	-0.0718526	0.0291529	5	-0.209622	0.0450198	3
G1410_P3D03-SC_37C	G1410_P3D03	1410	P3D03	P3_SC_37C	SC_37C	GAACTCAGGTTCCAT	-0.0445393	0.00295516	10	7.30572e-06	5.90191e-05	-0.0336499	-0.0108894	-0.0420582	0.00386556	5	-0.0478555	0.00446895	5
G1410_P3D03-SC_37C	G1410_P3D03	1410	P3D03	P3_SC_37C	SC_37C	GAGAATGAAGGACAG	-0.0361043	0.00191288	10	2.00893e-10	3.78455e-08	-0.0393988	0.0032945	-0.0425875	0.00148626	5	-0.0329028	0.00104443	5
G1410_P3D03-SC_37C	G1410_P3D03	1410	P3D03	P3_SC_37C	SC_37C	GAGTGCTTCAAAGTT	0.00414868	0.00143818	10	0.108758	0.161094	0.00639281	-0.00224413	0.00361726	0.00185962	5	0.00499449	0.0023461	5
G1410_P3D03-SC_37C	G1410_P3D03	1410	P3D03	P3_SC_37C	SC_37C	GCCCTCGAAACCTAT	-0.10469	0.00374738	8	3.56745e-08	1.08999e-06	-0.0594649	-0.0452253	-0.106108	0.00195681	5	-0.0919185	0.00587296	3
G1410_P3D03-SC_37C	G1410_P3D03	1410	P3D03	P3_SC_37C	SC_37C	GCTAATTTCAAGAAT	-0.123384	0.00394098	4	0.00174084	0.00501171	-0.1467	0.0233161	-0.12185	0.00511662	3	-0.127977	0.00885476	1
G1410_P3D03-SC_37C	G1410_P3D03	1410	P3D03	P3_SC_37C	SC_37C	GCTGCTTATGAGGAT	-0.00362498	0.0024706	10	0.692664	0.753319	-0.00893866	0.00531368	-0.00132249	0.00278708	5	-0.00776981	0.00373943	5
G1410_P3D03-SC_37C	G1410_P3D03	1410	P3D03	P3_SC_37C	SC_37C	GGTGGAAGTAGCAGT	0.00285647	0.0036447	7	0.21347	0.284193	-0.00624002	0.00909649	0.00425125	0.00176717	4	-0.00813714	0.00496131	3
G1410_P3D03-SC_37C	G1410_P3D03	1410	P3D03	P3_SC_37C	SC_37C	GGTTGCCCAGAAGTA	-0.0168905	0.00145597	9	4.06271e-05	0.000232561	-0.036133	0.0192425	-0.0173788	0.00166264	5	-0.0156167	0.00268535	4
G1410_P3D03-SC_37C	G1410_P3D03	1410	P3D03	P3_SC_37C	SC_37C	GTAATCTGACTCTAG	-0.128898	0.0289904	10	0.0333918	0.0594655	-0.0618965	-0.0670015	-0.103077	0.0358195	5	-0.168101	0.0441357	5
G1410_P3D03-SC_37C	G1410_P3D03	1410	P3D03	P3_SC_37C	SC_37C	GTACAAGAAATTTTG	-0.0170206	0.00278664	8	0.000357479	0.00135932	-0.0137529	-0.0032677	-0.0223136	0.00329015	4	-0.012523	0.00303286	4
G1410_P3D03-SC_37C	G1410_P3D03	1410	P3D03	P3_SC_37C	SC_37C	GTCACCGGCACTAAC	-0.00945285	0.00187378	9	1.78794e-05	0.000119937	-0.00534868	-0.00410417	-0.0141828	0.00164194	5	-0.00564914	0.00147242	4
G1410_P3D03-SC_37C	G1410_P3D03	1410	P3D03	P3_SC_37C	SC_37C	GTGTGATTACTAAAT	-0.0636414	0.00387521	9	1.22935e-06	1.45987e-05	-0.0463609	-0.0172806	-0.0712613	0.00579042	5	-0.0617053	0.00291877	4
G1410_P3D03-SC_37C	G1410_P3D03	1410	P3D03	P3_SC_37C	SC_37C	GTTAAATCAACAGTT	-0.0201937	0.00185176	10	2.41249e-06	2.44527e-05	-0.0321192	0.0119255	-0.0209805	0.00094123	5	-0.0145561	0.00251957	5
G1410_P3D03-SC_37C	G1410_P3D03	1410	P3D03	P3_SC_37C	SC_37C	GTTCAGCTTTGATCG	-0.0824955	0.00665506	10	2.26882e-09	1.84723e-07	-0.213555	0.131059	-0.0730906	0.00192564	5	-0.108054	0.00317444	5
G1410_P3D03-SC_37C	G1410_P3D03	1410	P3D03	P3_SC_37C	SC_37C	GTTGAACTGGTTGTT	-0.025668	0.00779804	9	0.0160452	0.0323528	-0.00922277	-0.0164452	-0.0254739	0.00126688	5	-0.0484695	0.0137332	4
G1410_P3D03-SC_37C	G1410_P3D03	1410	P3D03	P3_SC_37C	SC_37C	GTTGGGCGCTTAAAG	-0.000317574	0.000926454	10	0.111982	0.165005	-0.000664285	0.000346711	-0.00183236	0.00140995	5	0.000479534	0.00102279	5
G1410_P3D03-SC_37C	G1410_P3D03	1410	P3D03	P3_SC_37C	SC_37C	GTTTAGCTTCCGTTG	-0.0838051	0.0052879	9	1.06216e-05	7.98028e-05	-0.0426792	-0.0411258	-0.0839032	0.00431922	5	-0.0830885	0.0116723	4
G1410_P3D03-SC_37C	G1410_P3D03	1410	P3D03	P3_SC_37C	SC_37C	GTTTGTTTTGGGAAA	-0.173353	0.0113138	10	7.47239e-06	6.00152e-05	-0.082592	-0.0907609	-0.171121	0.0127431	5	-0.178914	0.0201134	5
G1410_P3D03-SC_37C	G1410_P3D03	1410	P3D03	P3_SC_37C	SC_37C	TAACCTCGCGCTGAG	0.000748051	0.00188392	10	0.0887392	0.136	0.00308065	-0.00233259	-0.00385796	0.00237726	5	0.00336388	0.00179151	5
G1410_P3D03-SC_37C	G1410_P3D03	1410	P3D03	P3_SC_37C	SC_37C	TAATATTGTTTTGCG	-0.145915	0.0196628	9	2.15054e-05	0.0001396	-0.109047	-0.036868	-0.182718	0.0181011	5	-0.0975807	0.0207438	4
G1410_P3D03-SC_37C	G1410_P3D03	1410	P3D03	P3_SC_37C	SC_37C	TACACCAATTACACT	-0.0750347	0.0302435	3	0.131197	0.188547			-0.0750347	0.0302435	3
G1410_P3D03-SC_37C	G1410_P3D03	1410	P3D03	P3_SC_37C	SC_37C	TAGACGGACATCTTC	-0.0130311	0.00179053	7	0.00209503	0.00583581	0.000336127	-0.0133672	-0.0130462	0.00227469	5	-0.01299	0.00375736	2
G1410_P3D03-SC_37C	G1410_P3D03	1410	P3D03	P3_SC_37C	SC_37C	TATATTGAACTTTAC	0.000903352	0.00140688	10	0.780934	0.827008	0.0042387	-0.00333535	0.000566608	0.00175494	5	0.00151662	0.00236831	5
G1410_P3D03-SC_37C	G1410_P3D03	1410	P3D03	P3_SC_37C	SC_37C	TATGCCCTTCTTCTG	-0.0281449	0.00234441	10	3.00892e-07	5.05149e-06	-0.0127424	-0.0154025	-0.0293648	0.00103445	5	-0.0201085	0.00265506	5
G1410_P3D03-SC_37C	G1410_P3D03	1410	P3D03	P3_SC_37C	SC_37C	TCAAAACGGAGTGTT	-0.00198094	0.00102867	10	0.562644	0.636078	-0.00216713	0.000186188	-0.000614765	0.00107374	5	-0.00417053	0.00135933	5
G1410_P3D03-SC_37C	G1410_P3D03	1410	P3D03	P3_SC_37C	SC_37C	TCAAAGCATGAAAAA	-0.0584843	0.00423537	10	2.88694e-06	2.82503e-05	-0.0702694	0.0117851	-0.0577183	0.00183194	5	-0.0693501	0.00689981	5
G1410_P3D03-SC_37C	G1410_P3D03	1410	P3D03	P3_SC_37C	SC_37C	TCAAATGATGAGGAT	-0.0471648	0.00148394	9	6.41565e-08	1.6754e-06	-0.0161742	-0.0309906	-0.0472857	0.00174336	5	-0.0468527	0.00280142	4
G1410_P3D03-SC_37C	G1410_P3D03	1410	P3D03	P3_SC_37C	SC_37C	TCAACAACCTATGCA	-0.00218505	0.0010205	10	0.451074	0.530613	0.00126751	-0.00345256	-0.00101116	0.00171881	5	-0.00267449	0.00110986	5
G1410_P3D03-SC_37C	G1410_P3D03	1410	P3D03	P3_SC_37C	SC_37C	TCATAGGTATCTCGC	-0.00080265	0.00120591	10	0.808498	0.849841	-0.0034091	0.00260645	-0.000376142	0.000984547	5	-0.00276828	0.00211361	5
G1410_P3D03-SC_37C	G1410_P3D03	1410	P3D03	P3_SC_37C	SC_37C	TCGAAAGCACAGTAG	-0.0768163	0.00598593	8	9.04152e-05	0.000444651	-0.151621	0.0748044	-0.0747935	0.00880149	5	-0.0786578	0.00839781	3
G1410_P3D03-SC_37C	G1410_P3D03	1410	P3D03	P3_SC_37C	SC_37C	TCGATAGAATTTACT	-0.0642577	0.0036989	10	7.38563e-12	5.5855e-09	-0.0528411	-0.0114166	-0.077849	0.00171869	5	-0.0576538	0.00119803	5
G1410_P3D03-SC_37C	G1410_P3D03	1410	P3D03	P3_SC_37C	SC_37C	TCTTGGAGGTGAATG	-0.044104	0.00210556	10	4.5328e-07	6.85257e-06	-0.0609332	0.0168292	-0.0447875	0.00287633	5	-0.0431747	0.00335387	5
G1410_P3D03-SC_37C	G1410_P3D03	1410	P3D03	P3_SC_37C	SC_37C	TGATCATCACGGGAC	-0.131825	0.00663834	10	1.01264e-06	1.25677e-05	-0.0368104	-0.0950143	-0.131398	0.0087438	5	-0.132503	0.011027	5
G1410_P3D03-SC_37C	G1410_P3D03	1410	P3D03	P3_SC_37C	SC_37C	TGGAGTCTTTGTTGA	-0.0600931	0.00161993	10	2.74296e-09	2.04968e-07	-0.0760209	0.0159277	-0.0611311	0.00185764	5	-0.058014	0.00262907	5
G1410_P3D03-SC_37C	G1410_P3D03	1410	P3D03	P3_SC_37C	SC_37C	TTAATTAGAGGTATG	-0.0325256	0.00658878	7	0.0211173	0.0406182	-0.0165451	-0.0159804	-0.0315032	0.00990496	4	-0.0336298	0.0102938	3
G1410_P3D03-SC_37C	G1410_P3D03	1410	P3D03	P3_SC_37C	SC_37C	TTAATTGCACTTATG	-0.028608	0.0279855	5	0.474827	0.553521	-0.0441327	0.0155247	-0.0282019	0.00657787	3	-0.0779962	0.0725386	2
G1410_P3D03-SC_37C	G1410_P3D03	1410	P3D03	P3_SC_37C	SC_37C	TTAGTCTTTCCATCA	-0.243323	0.0167537	10	4.11917e-06	3.7156e-05	-0.183045	-0.0602774	-0.260057	0.0233726	5	-0.22585	0.0238825	5
G1410_P3D03-SC_37C	G1410_P3D03	1410	P3D03	P3_SC_37C	SC_37C	TTATATTTATTTGCT	-0.00266474	0.00121776	10	0.135981	0.194324	-0.0132206	0.0105559	-0.00277743	0.00125761	5	-0.00231123	0.00222742	5
G1410_P3D03-SC_37C	G1410_P3D03	1410	P3D03	P3_SC_37C	SC_37C	TTTAACTCACCGTAA	-0.0120389	0.0033827	10	0.0130563	0.0272386	-0.0184056	0.00636679	-0.00816112	0.00188257	5	-0.0236167	0.00325293	5
G1410_P3D03-SC_37C	G1410_P3D03	1410	P3D03	P3_SC_37C	SC_37C	TTTATAAATCAATAG	-0.00184509	0.000835452	10	0.0145967	0.0298671	-0.000226545	-0.00161854	-0.00265205	0.000933576	5	-0.000440262	0.00123178	5
G1410_P3D03-SC_37C	G1410_P3D03	1410	P3D03	P3_SC_37C	SC_37C	TTTTGCATTTAGGCG	-0.0217603	0.00167722	10	1.04593e-07	2.28984e-06	-0.00776484	-0.0139955	-0.0208795	0.000693913	5	-0.0276488	0.00179415	5
G1410_P1C05-SC_37C	G1410_P1C05	1410	P1C05	P1_SC_37C	SC_37C	AAAACATTATCAAAG	-0.000419073	0.00201094	8	0.248336	0.322712	-0.000652642	0.00023357	-0.00219656	0.00272688	5	0.00119416	0.00259783	3
G1410_P1C05-SC_37C	G1410_P1C05	1410	P1C05	P1_SC_37C	SC_37C	AAAAGAAAAATGTAT	0.018564	0.00256292	9	4.07612e-08	1.21474e-06	0.0418506	-0.0232866	0.0228817	0.00205419	5	0.0114282	0.00264079	4
G1410_P1C05-SC_37C	G1410_P1C05	1410	P1C05	P1_SC_37C	SC_37C	AAAAGCGACATTTCT	-0.0297259	0.00289753	6	0.000387885	0.0014532	-0.0616103	0.0318844	-0.0309326	0.00331966	5	-0.0246986	0.0067758	1
G1410_P1C05-SC_37C	G1410_P1C05	1410	P1C05	P1_SC_37C	SC_37C	ACAACCTACCTGCTA	-0.000382341	0.00192407	8	0.492417	0.569919	-0.00161883	0.00123649	0.00109162	0.00239661	5	-0.00263609	0.00296352	3
G1410_P1C05-SC_37C	G1410_P1C05	1410	P1C05	P1_SC_37C	SC_37C	ACAAGTTTTACAGTT	0.00483488	0.00265487	6	0.21487	0.285721	0.021037	-0.0162021	0.00353188	0.00297802	5	0.00999973	0.00592906	1
G1410_P1C05-SC_37C	G1410_P1C05	1410	P1C05	P1_SC_37C	SC_37C	ACAGGGCAGCTCCCG	-0.0132971	0.00622661	6	0.0476227	0.0802647	-0.0292694	0.0159723	-0.0208499	0.00867853	4	-0.0123756	0.00303141	2
G1410_P1C05-SC_37C	G1410_P1C05	1410	P1C05	P1_SC_37C	SC_37C	ACAGTTGACGGACAG	0.00337176	0.0023567	7	0.74197	0.793835	0.00149213	0.00187963	0.000681381	0.0027825	5	0.00616067	0.00283299	2
G1410_P1C05-SC_37C	G1410_P1C05	1410	P1C05	P1_SC_37C	SC_37C	ACCACCGGTCCTGCC	-0.00158461	0.0070486	4	0.963679	0.971714	-0.00133408	-0.000250524	-0.000495539	0.00980121	3	-0.00481827	0.0168888	1
G1410_P1C05-SC_37C	G1410_P1C05	1410	P1C05	P1_SC_37C	SC_37C	AGAACATCATCTACA	-0.170811	0.0163747	4	0.0170995	0.0341195			-0.167975	0.0101918	2	-0.195269	0.0299316	2
G1410_P1C05-SC_37C	G1410_P1C05	1410	P1C05	P1_SC_37C	SC_37C	AGAAGACGACGATGA	-0.0780265	0.00258909	10	7.56986e-11	2.14313e-08	-0.0269064	-0.0511201	-0.0742595	0.00231643	5	-0.0848938	0.00312764	5
G1410_P1C05-SC_37C	G1410_P1C05	1410	P1C05	P1_SC_37C	SC_37C	AGATTCATCCCATGG	-0.00585914	0.00185555	3	0.186478	0.253515	-0.00105522	-0.00480392	-0.00507918	0.00233711	2	-0.00744151	0.00332888	1
G1410_P1C05-SC_37C	G1410_P1C05	1410	P1C05	P1_SC_37C	SC_37C	AGTGTATGATAATAT	-0.0276535	0.00196087	10	8.42903e-07	1.10179e-05	-0.01028	-0.0173735	-0.0271145	0.00314017	5	-0.0280715	0.00276512	5
G1410_P1C05-SC_37C	G1410_P1C05	1410	P1C05	P1_SC_37C	SC_37C	AGTGTTAATCAGACC	-0.0556232	0.00887292	4	0.0077384	0.0175811	-0.0454435	-0.0101797	-0.0556232	0.00887292	4
G1410_P1C05-SC_37C	G1410_P1C05	1410	P1C05	P1_SC_37C	SC_37C	AGTTTATAAAAAATT	-0.0072795	0.016877	4	0.693798	0.753894	0.0647237	-0.0720032	-0.0072795	0.016877	4
G1410_P1C05-SC_37C	G1410_P1C05	1410	P1C05	P1_SC_37C	SC_37C	ATAGAGCGGCGTTGA	-0.00577161	0.0195005	6	0.768616	0.816253	-0.011058	0.00528643	-0.00478626	0.00522077	4	-0.0675998	0.0413556	2
G1410_P1C05-SC_37C	G1410_P1C05	1410	P1C05	P1_SC_37C	SC_37C	ATATTGAGTAAGTAC	-0.00828189	0.00481749	3	0.205919	0.275525	0.00108997	-0.00937186	-0.00828189	0.00481749	3
G1410_P1C05-SC_37C	G1410_P1C05	1410	P1C05	P1_SC_37C	SC_37C	ATCGTTGGCATTTGG	-0.198663	0.00387928	10	1.74095e-10	3.71648e-08	-0.105906	-0.0927573	-0.19269	0.0060136	5	-0.201996	0.00449214	5
G1410_P1C05-SC_37C	G1410_P1C05	1410	P1C05	P1_SC_37C	SC_37C	ATGGCGATGGTCTTG	-0.00906156	0.00362552	3	0.103517	0.154432	-0.00278687	-0.00627469	-0.00906156	0.00362552	3
G1410_P1C05-SC_37C	G1410_P1C05	1410	P1C05	P1_SC_37C	SC_37C	ATTATCAAGTGCCAG	-0.0648306	0.00645156	9	0.0001735	0.000746558	-0.0673298	0.00249921	-0.06473	0.00270361	5	-0.0680426	0.0152789	4
G1410_P1C05-SC_37C	G1410_P1C05	1410	P1C05	P1_SC_37C	SC_37C	ATTATCATCGCCATC	-0.118242	0.0264243	4	0.0292442	0.0532128	-0.0768754	-0.0413667	-0.138355	0.0242583	3	-0.0580035	0.0419814	1
G1410_P1C05-SC_37C	G1410_P1C05	1410	P1C05	P1_SC_37C	SC_37C	CAAGGATCCCCGTAG	-0.0171034	0.00845157	4	0.211329	0.281824	-0.0256483	0.00854494	-0.00944429	0.00549707	3	-0.0393308	0.00936456	1
G1410_P1C05-SC_37C	G1410_P1C05	1410	P1C05	P1_SC_37C	SC_37C	CAAGTTCGGCGAAAT	-0.00177135	0.00181373	7	0.222419	0.294064	-0.00314285	0.0013715	-0.00220734	0.00241428	4	-0.00107322	0.00305503	3
G1410_P1C05-SC_37C	G1410_P1C05	1410	P1C05	P1_SC_37C	SC_37C	CAATCTTGAATTGAT	0.00416835	0.00396838	6	0.0383768	0.066825	0.0141933	-0.0100249	0.00778594	0.00311001	5	-0.0104826	0.00625871	1
G1410_P1C05-SC_37C	G1410_P1C05	1410	P1C05	P1_SC_37C	SC_37C	CAATTTCAACGTTGT	-0.0780621	0.0289965	3	0.114362	0.167956	-0.0641989	-0.0138633	-0.0780621	0.0289965	3
G1410_P1C05-SC_37C	G1410_P1C05	1410	P1C05	P1_SC_37C	SC_37C	CATATGCATTCCTTG	-0.00937484	0.00151565	10	3.81622e-07	5.99479e-06	-0.00930645	-6.83901e-05	-0.00880371	0.0017921	5	-0.010616	0.00264186	5
G1410_P1C05-SC_37C	G1410_P1C05	1410	P1C05	P1_SC_37C	SC_37C	CATTTATGGCTATCT	-0.166715	0.0103581	5	7.59759e-05	0.00038744	-0.0900852	-0.0766298	-0.176661	0.00534782	3	-0.139237	0.00888883	2
G1410_P1C05-SC_37C	G1410_P1C05	1410	P1C05	P1_SC_37C	SC_37C	CCAACACAGGCTTCG	-0.00332166	0.00937402	4	0.742158	0.79384	0.00488293	-0.00820458	-0.00332166	0.00937402	4
G1410_P1C05-SC_37C	G1410_P1C05	1410	P1C05	P1_SC_37C	SC_37C	CGAATGCCATACAAA	-0.00885295	0.0131945	6	0.559832	0.633581	-0.0187919	0.009939	-0.00828778	0.00452456	4	-0.0437554	0.0355564	2
G1410_P1C05-SC_37C	G1410_P1C05	1410	P1C05	P1_SC_37C	SC_37C	CGATGATGATGATGA	-0.00693976	0.00316497	7	0.0919133	0.140108	-0.00559316	-0.00134659	-0.00626254	0.00269392	5	-0.0142321	0.0088401	2
G1410_P1C05-SC_37C	G1410_P1C05	1410	P1C05	P1_SC_37C	SC_37C	CGCGATCAATCCTCT	-0.00798454	0.00488379	4	0.394436	0.474184	-0.0319146	0.0239301	-0.00641404	0.00371962	2	-0.0155575	0.00816797	2
G1410_P1C05-SC_37C	G1410_P1C05	1410	P1C05	P1_SC_37C	SC_37C	CTAAGCAGTCTTCTC	-0.0837017	0.00725826	9	3.11718e-05	0.000187374	-0.133331	0.0496289	-0.0812773	0.00524779	5	-0.0997017	0.0134814	4
G1410_P1C05-SC_37C	G1410_P1C05	1410	P1C05	P1_SC_37C	SC_37C	CTACTTACAACGGAA	0.00819585	0.00281727	9	0.0264356	0.0490042	2.16745e-05	0.00817417	0.00963121	0.00482174	5	0.00774615	0.00269887	4
G1410_P1C05-SC_37C	G1410_P1C05	1410	P1C05	P1_SC_37C	SC_37C	CTCGCTAATACTCCT	-0.0181371	0.00358111	10	0.000376958	0.00141982	-0.0375804	0.0194432	-0.0198731	0.00219565	5	-0.00817754	0.00525903	5
G1410_P1C05-SC_37C	G1410_P1C05	1410	P1C05	P1_SC_37C	SC_37C	CTCTTGAGAATACTT	-0.0928283	0.00834788	7	0.000224351	0.000920532	-0.0948968	0.00206853	-0.092647	0.00367964	5	-0.107607	0.0332297	2
G1410_P1C05-SC_37C	G1410_P1C05	1410	P1C05	P1_SC_37C	SC_37C	CTGATTTGTGCTGTC	0.00315812	0.00479581	3	0.552219	0.626845	0.0375917	-0.0344336	0.00315812	0.00479581	3
G1410_P1C05-SC_37C	G1410_P1C05	1410	P1C05	P1_SC_37C	SC_37C	CTTGATCAATCAAAA	-0.133356	0.00372836	9	2.25467e-08	8.23649e-07	-0.0824445	-0.0509117	-0.134325	0.00557829	5	-0.132417	0.00549482	4
G1410_P1C05-SC_37C	G1410_P1C05	1410	P1C05	P1_SC_37C	SC_37C	CTTGCAAGTGTAATT	-0.00696605	0.00981471	7	0.0569683	0.0932529	0.000560442	-0.00752649	-0.0243501	0.0111589	5	-0.00509821	0.00365776	2
G1410_P1C05-SC_37C	G1410_P1C05	1410	P1C05	P1_SC_37C	SC_37C	CTTTCTTGTGTATTT	-0.0573688	0.0208662	3	0.555837	0.63032	-0.0498822	-0.00748666	-0.0216305	0.0258617	1	-0.0754961	0.0184186	2
G1410_P1C05-SC_37C	G1410_P1C05	1410	P1C05	P1_SC_37C	SC_37C	GAACTCAGGTTCCAT	-0.0344052	0.00380477	6	0.00202734	0.00567136	-0.0442945	0.0098893	-0.0343153	0.00307448	4	-0.0358572	0.0123602	2
G1410_P1C05-SC_37C	G1410_P1C05	1410	P1C05	P1_SC_37C	SC_37C	GAGAATGAAGGACAG	-0.0572908	0.00288949	8	1.6334e-06	1.81019e-05	0.00446468	-0.0617555	-0.0529306	0.00391448	5	-0.0592367	0.002615	3
G1410_P1C05-SC_37C	G1410_P1C05	1410	P1C05	P1_SC_37C	SC_37C	GAGTGCTTCAAAGTT	0.00566047	0.00335216	6	0.035244	0.0621949	0.0186933	-0.0130329	0.00723802	0.00237707	4	-0.00383367	0.00583147	2
G1410_P1C05-SC_37C	G1410_P1C05	1410	P1C05	P1_SC_37C	SC_37C	GCTGCTTATGAGGAT	-0.00282608	0.0057589	9	0.738655	0.790976	-0.0056472	0.00282112	-0.00237641	0.00226448	5	-0.015075	0.0118187	4
G1410_P1C05-SC_37C	G1410_P1C05	1410	P1C05	P1_SC_37C	SC_37C	GGTTGCCCAGAAGTA	-0.145629	0.0128746	5	0.000335524	0.00128683	-0.0194968	-0.126132	-0.145629	0.0128746	5
G1410_P1C05-SC_37C	G1410_P1C05	1410	P1C05	P1_SC_37C	SC_37C	GTAATCTGACTCTAG	-0.00941732	0.00842062	3	0.172465	0.237301	0.0077402	-0.0171575	-0.0172269	0.00509971	2	0.00624904	0.00722297	1
G1410_P1C05-SC_37C	G1410_P1C05	1410	P1C05	P1_SC_37C	SC_37C	GTACAAGAAATTTTG	-0.0195947	0.0139043	3	0.291265	0.368616	-0.0434344	0.0238397	-0.0195947	0.0139043	3
G1410_P1C05-SC_37C	G1410_P1C05	1410	P1C05	P1_SC_37C	SC_37C	GTGTGATTACTAAAT	-0.0105284	0.011138	3	0.357273	0.436201	-0.0108598	0.00033133	-0.0191196	0.012148	2	0.00666312	0.0171845	1
G1410_P1C05-SC_37C	G1410_P1C05	1410	P1C05	P1_SC_37C	SC_37C	GTTAAATCAACAGTT	-0.0187013	0.00199026	8	7.03778e-05	0.000362871	-0.0412742	0.0225728	-0.0177144	0.00285075	5	-0.019489	0.00254671	3
G1410_P1C05-SC_37C	G1410_P1C05	1410	P1C05	P1_SC_37C	SC_37C	GTTCAGCTTTGATCG	-0.193052	0.00553484	10	6.85482e-09	3.57282e-07	-0.124119	-0.0689328	-0.197266	0.0101008	5	-0.191759	0.00559402	5
G1410_P1C05-SC_37C	G1410_P1C05	1410	P1C05	P1_SC_37C	SC_37C	GTTGAACTGGTTGTT	-0.0324309	0.00229107	8	1.04647e-05	7.88622e-05	-0.0331275	0.000696632	-0.0345255	0.00392029	4	-0.0314341	0.00270432	4
G1410_P1C05-SC_37C	G1410_P1C05	1410	P1C05	P1_SC_37C	SC_37C	GTTGGGCGCTTAAAG	-0.000418127	0.00212118	8	0.491586	0.569168	-0.00339134	0.00297321	-0.00146223	0.00263226	5	0.00163314	0.00368951	3
G1410_P1C05-SC_37C	G1410_P1C05	1410	P1C05	P1_SC_37C	SC_37C	GTTTAGCTTCCGTTG	-0.00336391	0.0039287	6	0.279419	0.355939	0.000432998	-0.00379691	-0.00600924	0.00566579	4	-0.00193461	0.00416467	2
G1410_P1C05-SC_37C	G1410_P1C05	1410	P1C05	P1_SC_37C	SC_37C	GTTTGTTTTGGGAAA	-0.259902	0.0253518	4	0.00269913	0.00719211	-0.140287	-0.119615	-0.236014	0.0124127	3	-0.331109	0.0214305	1
G1410_P1C05-SC_37C	G1410_P1C05	1410	P1C05	P1_SC_37C	SC_37C	TAACCTCGCGCTGAG	-0.0251719	0.0112535	5	0.214762	0.285608	0.0247705	-0.0499423	-0.0248603	0.00552943	3	-0.0359171	0.0324718	2
G1410_P1C05-SC_37C	G1410_P1C05	1410	P1C05	P1_SC_37C	SC_37C	TATATTGAACTTTAC	0.00986522	0.00256294	7	0.0222412	0.0424351	0.0115448	-0.00167963	0.008384	0.00318237	5	0.0125749	0.00430427	2
G1410_P1C05-SC_37C	G1410_P1C05	1410	P1C05	P1_SC_37C	SC_37C	TATGCCCTTCTTCTG	-0.0187776	0.00383247	6	0.0110193	0.0237158	0.00616433	-0.024942	-0.0167973	0.00414673	5	-0.0276211	0.00876284	1
G1410_P1C05-SC_37C	G1410_P1C05	1410	P1C05	P1_SC_37C	SC_37C	TCAAAACGGAGTGTT	-0.00402206	0.00389231	8	0.0623224	0.100655	-0.00120033	-0.00282174	-0.00982985	0.00546656	5	-0.00214681	0.00310627	3
G1410_P1C05-SC_37C	G1410_P1C05	1410	P1C05	P1_SC_37C	SC_37C	TCAAAGCATGAAAAA	-0.0760257	0.00698804	8	2.16433e-06	2.25615e-05	-0.086374	0.0103483	-0.0944996	0.00673432	5	-0.0720096	0.0031399	3
G1410_P1C05-SC_37C	G1410_P1C05	1410	P1C05	P1_SC_37C	SC_37C	TCAAATGATGAGGAT	0.00108625	0.00183092	7	0.00289251	0.00762743	0.0191963	-0.0181101	0.00292545	0.00184209	5	-0.00284371	0.00269272	2
G1410_P1C05-SC_37C	G1410_P1C05	1410	P1C05	P1_SC_37C	SC_37C	TCAACAACCTATGCA	-0.00533935	0.00413414	4	0.589926	0.661331	0.0238632	-0.0292026	-0.00240241	0.00417022	3	-0.0136506	0.00701526	1
G1410_P1C05-SC_37C	G1410_P1C05	1410	P1C05	P1_SC_37C	SC_37C	TCATAGGTATCTCGC	-0.000461186	0.00331802	10	0.925658	0.943564	-0.00351693	0.00305575	0.000357116	0.00195303	5	-0.00758345	0.00576182	5
G1410_P1C05-SC_37C	G1410_P1C05	1410	P1C05	P1_SC_37C	SC_37C	TCGAAAGCACAGTAG	-0.171931	0.0271667	6	0.0108344	0.0233867	-0.135006	-0.0369245	-0.0764587	0.0231538	2	-0.191545	0.0104947	4
G1410_P1C05-SC_37C	G1410_P1C05	1410	P1C05	P1_SC_37C	SC_37C	TCGATAGAATTTACT	-0.169015	0.00438653	7	6.13985e-07	8.62278e-06	-0.0242833	-0.144732	-0.168838	0.00621538	5	-0.169072	0.0035172	2
G1410_P1C05-SC_37C	G1410_P1C05	1410	P1C05	P1_SC_37C	SC_37C	TCTTGGAGGTGAATG	-0.154264	0.0168778	8	0.000254277	0.00101948	-0.0830805	-0.0711833	-0.152133	0.00979936	5	-0.191032	0.0407013	3
G1410_P1C05-SC_37C	G1410_P1C05	1410	P1C05	P1_SC_37C	SC_37C	TGATCATCACGGGAC	-0.00876294	0.00220016	9	0.010187	0.0222371	-0.0208832	0.0121203	-0.00667855	0.0025655	5	-0.0123473	0.00336423	4
G1410_P1C05-SC_37C	G1410_P1C05	1410	P1C05	P1_SC_37C	SC_37C	TGGAGTCTTTGTTGA	-0.0493488	0.00623952	7	6.58909e-05	0.000342154	-0.063193	0.0138442	-0.0625955	0.00600747	5	-0.0469001	0.00258289	2
G1410_P1C05-SC_37C	G1410_P1C05	1410	P1C05	P1_SC_37C	SC_37C	TTAATTAGAGGTATG	-0.0178106	0.00705122	4	0.0464778	0.0785901	-0.0312409	0.0134303	-0.0104881	0.00293394	3	-0.0372615	0.00478181	1
G1410_P1C05-SC_37C	G1410_P1C05	1410	P1C05	P1_SC_37C	SC_37C	TTATATTTATTTGCT	-0.00643481	0.00181653	7	0.00035603	0.00135463	-0.0146704	0.00823563	-0.00736778	0.00181786	5	-0.00255809	0.0037056	2
G1410_P1C05-SC_37C	G1410_P1C05	1410	P1C05	P1_SC_37C	SC_37C	TTTAACTCACCGTAA	-0.0183296	0.00445307	10	0.00246394	0.00666232	-0.0171085	-0.00122111	-0.0211361	0.00338831	5	-0.0072406	0.00673523	5
G1410_P1C05-SC_37C	G1410_P1C05	1410	P1C05	P1_SC_37C	SC_37C	TTTATAAATCAATAG	0.00384615	0.00185662	10	0.0615693	0.0995676	0.00352976	0.000316387	0.00161975	0.00195007	5	0.00783481	0.00261012	5
G1410_P1C05-SC_37C	G1410_P1C05	1410	P1C05	P1_SC_37C	SC_37C	TTTTGCATTTAGGCG	-0.0507486	0.001622	7	4.1388e-08	1.22173e-06	-0.0117231	-0.0390255	-0.0502176	0.00202966	5	-0.051674	0.00267953	2
G10150_P1G04-SC_37C	G10150_P1G04	10150	P1G04	P1_SC_37C	SC_37C	AAAACATTATCAAAG	0.000572506	0.00204309	9	0.512108	0.589347	-0.000652642	0.00122515	0.00120162	0.00154962	4	-0.00233768	0.00333287	5
G10150_P1G04-SC_37C	G10150_P1G04	10150	P1G04	P1_SC_37C	SC_37C	AAAAGAAAAATGTAT	0.00253098	0.00195348	10	0.161889	0.225022	0.0418506	-0.0393196	0.00264431	0.001016	5	0.00105991	0.00366046	5
G10150_P1G04-SC_37C	G10150_P1G04	10150	P1G04	P1_SC_37C	SC_37C	AAAAGCGACATTTCT	-0.0194338	0.00941462	7	0.348857	0.427433	-0.0616103	0.0421765	0.0128222	0.026943	2	-0.019986	0.00352516	5
G10150_P1G04-SC_37C	G10150_P1G04	10150	P1G04	P1_SC_37C	SC_37C	AATGATACCATTTTT	-0.0832319	0.00847545	9	0.000104024	0.000494589			-0.0617973	0.00929781	5	-0.0947002	0.006801	4
G10150_P1G04-SC_37C	G10150_P1G04	10150	P1G04	P1_SC_37C	SC_37C	ACAACCTACCTGCTA	0.00242919	0.00251673	8	0.742099	0.79384	-0.00161883	0.00404803	0.00119077	0.00498375	3	0.00299886	0.00338013	5
G10150_P1G04-SC_37C	G10150_P1G04	10150	P1G04	P1_SC_37C	SC_37C	ACAAGTTTTACAGTT	-0.0159089	0.00473688	8	0.000374907	0.00141265	0.021037	-0.0369459	-0.0214256	0.00273336	4	-0.00188962	0.00435735	4
G10150_P1G04-SC_37C	G10150_P1G04	10150	P1G04	P1_SC_37C	SC_37C	ACAGGGCAGCTCCCG	-0.0088477	0.00972817	5	0.645306	0.711819	-0.0292694	0.0204217	0.00580929	0.013471	3	-0.0128501	0.0070394	2
G10150_P1G04-SC_37C	G10150_P1G04	10150	P1G04	P1_SC_37C	SC_37C	ACAGTTGACGGACAG	-0.00640698	0.00442206	10	0.0103545	0.0225225	0.00149213	-0.00789911	-0.0166521	0.00697859	5	-0.00434625	0.00312983	5
G10150_P1G04-SC_37C	G10150_P1G04	10150	P1G04	P1_SC_37C	SC_37C	ACCACCGGTCCTGCC	-0.00576919	0.0026788	9	0.564618	0.638013	-0.00133408	-0.00443511	-0.00166902	0.00358951	4	-0.00935013	0.00335453	5
G10150_P1G04-SC_37C	G10150_P1G04	10150	P1G04	P1_SC_37C	SC_37C	AGAACATCATCTACA	-0.0884166	0.01806	4	0.0864107	0.133072			-0.117601	0.0370209	1	-0.0785229	0.0215549	3
G10150_P1G04-SC_37C	G10150_P1G04	10150	P1G04	P1_SC_37C	SC_37C	AGAAGACGACGATGA	-0.127418	0.00661017	9	2.74958e-10	4.39123e-08	-0.0269064	-0.100512	-0.146986	0.00376016	4	-0.111837	0.00335531	5
G10150_P1G04-SC_37C	G10150_P1G04	10150	P1G04	P1_SC_37C	SC_37C	AGATTCATCCCATGG	-0.000336709	0.00263265	9	0.967217	0.97402	-0.00105522	0.000718511	-0.000130166	0.0039786	5	-0.000464463	0.00312904	4
G10150_P1G04-SC_37C	G10150_P1G04	10150	P1G04	P1_SC_37C	SC_37C	AGTGTATGATAATAT	-0.0233391	0.00188969	10	4.71643e-09	2.81113e-07	-0.01028	-0.0130591	-0.0230057	0.000892429	5	-0.0272226	0.00304594	5
G10150_P1G04-SC_37C	G10150_P1G04	10150	P1G04	P1_SC_37C	SC_37C	AGTGTTAATCAGACC	-0.0102917	0.00379179	8	0.0777166	0.121638	-0.0454435	0.0351518	-0.00982725	0.00341342	5	-0.0133998	0.00883002	3
G10150_P1G04-SC_37C	G10150_P1G04	10150	P1G04	P1_SC_37C	SC_37C	AGTTTATAAAAAATT	-0.0220622	0.0110218	5	0.0249113	0.0465596	0.0647237	-0.0867859	-0.0281705	0.00341221	2	0.00398285	0.00704593	3
G10150_P1G04-SC_37C	G10150_P1G04	10150	P1G04	P1_SC_37C	SC_37C	ATAGAGCGGCGTTGA	-0.000644455	0.00192356	7	0.999828	0.999828	-0.011058	0.0104136	-2.39619e-07	0.0013563	4	-0.00386195	0.00303109	3
G10150_P1G04-SC_37C	G10150_P1G04	10150	P1G04	P1_SC_37C	SC_37C	ATAGTCGATTAAGAT	-0.0430956	0.00675406	5	0.0237898	0.0448538	-0.0514128	0.00831723	-0.0432122	0.0011948	2	-0.034042	0.0105258	3
G10150_P1G04-SC_37C	G10150_P1G04	10150	P1G04	P1_SC_37C	SC_37C	ATATTGAGTAAGTAC	-0.000431744	0.0124797	6	0.198408	0.26685	0.00108997	-0.00152171	-0.0240491	0.0220304	3	0.000101489	0.00331028	3
G10150_P1G04-SC_37C	G10150_P1G04	10150	P1G04	P1_SC_37C	SC_37C	ATCGTTGGCATTTGG	-0.0846912	0.00484632	10	1.428e-06	1.63498e-05	-0.105906	0.0212146	-0.0755068	0.00766865	5	-0.0879595	0.00457462	5
G10150_P1G04-SC_37C	G10150_P1G04	10150	P1G04	P1_SC_37C	SC_37C	ATGAAGTTCATAATG	0.0121511	0.01903	3	0.346248	0.425073	0.0266474	-0.0144963	0.0432647	0.0261743	1	-0.00375402	0.0187141	2
G10150_P1G04-SC_37C	G10150_P1G04	10150	P1G04	P1_SC_37C	SC_37C	ATGGCGATGGTCTTG	-0.0047952	0.00488378	4	0.682636	0.744362	-0.00278687	-0.00200833	-0.00378167	0.0103552	2	-0.00506929	0.00538504	2
G10150_P1G04-SC_37C	G10150_P1G04	10150	P1G04	P1_SC_37C	SC_37C	ATTATCAAGTGCCAG	-0.0689948	0.00828109	10	0.00103199	0.00325702	-0.0673298	-0.00166504	-0.0563725	0.0138127	5	-0.0736496	0.00838801	5
G10150_P1G04-SC_37C	G10150_P1G04	10150	P1G04	P1_SC_37C	SC_37C	CAAGGATCCCCGTAG	0.00188503	0.00232694	6	0.588375	0.6599	-0.0256483	0.0275333	0.00174172	0.000933437	2	0.00414974	0.00371072	4
G10150_P1G04-SC_37C	G10150_P1G04	10150	P1G04	P1_SC_37C	SC_37C	CAAGTTCGGCGAAAT	0.0018686	0.00339277	5	0.71753	0.774011	-0.00314285	0.00501144	0.00204728	0.00147457	2	-0.000920725	0.00582609	3
G10150_P1G04-SC_37C	G10150_P1G04	10150	P1G04	P1_SC_37C	SC_37C	CAATCTTGAATTGAT	-0.00199964	0.00379239	10	0.613297	0.682983	0.0141933	-0.0161929	-0.00271906	0.00481336	5	-0.00079294	0.00623387	5
G10150_P1G04-SC_37C	G10150_P1G04	10150	P1G04	P1_SC_37C	SC_37C	CATATGCATTCCTTG	-0.00310526	0.00211401	10	0.192251	0.259945	-0.00930645	0.00620119	-0.00308203	0.00173585	5	-0.00322013	0.00385969	5
G10150_P1G04-SC_37C	G10150_P1G04	10150	P1G04	P1_SC_37C	SC_37C	CATCAATGAGGCAGT	-0.101166	0.00544394	10	1.1764e-06	1.40907e-05	-0.170366	0.0692004	-0.101387	0.00407189	5	-0.0996404	0.0106768	5
G10150_P1G04-SC_37C	G10150_P1G04	10150	P1G04	P1_SC_37C	SC_37C	CATTTATGGCTATCT	-0.0297745	0.00709912	5	0.0455531	0.0772678	-0.0900852	0.0603107	-0.0295508	0.00897299	4	-0.0306848	0.0181022	1
G10150_P1G04-SC_37C	G10150_P1G04	10150	P1G04	P1_SC_37C	SC_37C	CCAACACAGGCTTCG	-0.0350528	0.00324963	8	1.51435e-06	1.70563e-05	0.00488293	-0.0399357	-0.0338496	0.0012934	4	-0.0447122	0.0036646	4
G10150_P1G04-SC_37C	G10150_P1G04	10150	P1G04	P1_SC_37C	SC_37C	CCAAGACCGTGTAAA	-0.118811	0.0259033	3	0.340236	0.419014	-0.232802	0.113991	-0.096539	0.0571465	1	-0.13	0.0405034	2
G10150_P1G04-SC_37C	G10150_P1G04	10150	P1G04	P1_SC_37C	SC_37C	CCAGGATGTACCGCC	-0.0401187	0.00650294	4	0.0598663	0.0972808	-0.104767	0.0646478	-0.0402621	0.00245314	2	-0.0349839	0.0146815	2
G10150_P1G04-SC_37C	G10150_P1G04	10150	P1G04	P1_SC_37C	SC_37C	CCGTTAGTATCGCTA	-0.00507661	0.0116221	6	0.0119814	0.025422	-0.019524	0.0144473	-0.0446041	0.0185392	2	-0.00274516	0.00450251	4
G10150_P1G04-SC_37C	G10150_P1G04	10150	P1G04	P1_SC_37C	SC_37C	CGAACAGAAACACAA	-0.0323004	0.00880016	4	0.0316612	0.0568587	-0.0509589	0.0186585	-0.0483332	0.0108766	2	-0.0261338	0.00674551	2
G10150_P1G04-SC_37C	G10150_P1G04	10150	P1G04	P1_SC_37C	SC_37C	CGAATGCCATACAAA	0.00695638	0.00350984	6	0.109597	0.162163	-0.0187919	0.0257483	0.00866286	0.00491809	4	0.0063158	0.00301324	2
G10150_P1G04-SC_37C	G10150_P1G04	10150	P1G04	P1_SC_37C	SC_37C	CGATGATGATGATGA	0.00035699	0.00773848	9	0.960752	0.969941	-0.00559316	0.00595015	0.000526778	0.00132358	4	-0.0148235	0.0125153	5
G10150_P1G04-SC_37C	G10150_P1G04	10150	P1G04	P1_SC_37C	SC_37C	CGCGATCAATCCTCT	-0.0566152	0.0236661	4	0.207615	0.277555	-0.0319146	-0.0247006	-0.0605089	0.032948	3	-0.044912	0.0571221	1
G10150_P1G04-SC_37C	G10150_P1G04	10150	P1G04	P1_SC_37C	SC_37C	CTAAGCAGTCTTCTC	-0.0750626	0.00553522	9	1.5702e-05	0.000108126	-0.133331	0.058268	-0.0831689	0.0113285	4	-0.0738311	0.00441532	5
G10150_P1G04-SC_37C	G10150_P1G04	10150	P1G04	P1_SC_37C	SC_37C	CTAAGTGTGAAGGAG	-0.0226703	0.0104987	3	0.130907	0.18826	-0.131283	0.108613	-0.0408842	0.00856152	1	-0.0116577	0.00665726	2
G10150_P1G04-SC_37C	G10150_P1G04	10150	P1G04	P1_SC_37C	SC_37C	CTACTTACAACGGAA	0.00282994	0.00746977	8	0.790883	0.835637	2.16745e-05	0.00280826	0.00352166	0.00493971	3	-0.00130927	0.0120835	5
G10150_P1G04-SC_37C	G10150_P1G04	10150	P1G04	P1_SC_37C	SC_37C	CTATCAAGGCTTAAT	-0.00757022	0.00211806	8	0.0104367	0.0226736	0.0109081	-0.0184783	-0.00765396	0.000870655	4	-0.00575015	0.0040591	4
G10150_P1G04-SC_37C	G10150_P1G04	10150	P1G04	P1_SC_37C	SC_37C	CTCGCTAATACTCCT	0.00111165	0.00191848	10	0.265222	0.340535	-0.0375804	0.038692	0.00183178	0.00186467	5	-0.000905866	0.0031211	5
G10150_P1G04-SC_37C	G10150_P1G04	10150	P1G04	P1_SC_37C	SC_37C	CTCTTGAGAATACTT	-0.110005	0.0117936	10	6.39167e-05	0.000334121	-0.0948968	-0.015108	-0.0687704	0.0117814	5	-0.120144	0.0058421	5
G10150_P1G04-SC_37C	G10150_P1G04	10150	P1G04	P1_SC_37C	SC_37C	CTTGATCAATCAAAA	-0.0827061	0.00599437	10	6.06351e-06	5.10015e-05	-0.0824445	-0.000261629	-0.0882998	0.0108791	5	-0.0811596	0.00572045	5
G10150_P1G04-SC_37C	G10150_P1G04	10150	P1G04	P1_SC_37C	SC_37C	CTTGCAAGTGTAATT	-0.0189187	0.00604978	9	0.0334649	0.0595845	0.000560442	-0.0194791	-0.0226901	0.0063459	4	-0.0107116	0.00936117	5
G10150_P1G04-SC_37C	G10150_P1G04	10150	P1G04	P1_SC_37C	SC_37C	CTTTCTTGTGTATTT	-0.0330218	0.0116967	6	0.898202	0.921276	-0.0498822	0.0168604	-0.00372159	0.0273241	1	-0.0391897	0.0125365	5
G10150_P1G04-SC_37C	G10150_P1G04	10150	P1G04	P1_SC_37C	SC_37C	GAACTCAGGTTCCAT	-0.0251215	0.00352877	8	0.00169688	0.00490554	-0.0442945	0.0191729	-0.0200544	0.00455814	5	-0.0275941	0.00318403	3
G10150_P1G04-SC_37C	G10150_P1G04	10150	P1G04	P1_SC_37C	SC_37C	GAGAATGAAGGACAG	-0.104234	0.00619707	10	1.06969e-08	4.79321e-07	0.00446468	-0.108699	-0.0896669	0.00408184	5	-0.122167	0.00452895	5
G10150_P1G04-SC_37C	G10150_P1G04	10150	P1G04	P1_SC_37C	SC_37C	GAGTGCTTCAAAGTT	0.00455037	0.00229999	10	0.358372	0.43737	0.0186933	-0.014143	0.00165916	0.00236028	5	0.0091014	0.00296128	5
G10150_P1G04-SC_37C	G10150_P1G04	10150	P1G04	P1_SC_37C	SC_37C	GCTAATTTCAAGAAT	-0.0666819	0.0319485	3	0.754778	0.804576	-0.0633115	-0.00337036	-0.0231389	0.0570751	1	-0.0885559	0.0404531	2
G10150_P1G04-SC_37C	G10150_P1G04	10150	P1G04	P1_SC_37C	SC_37C	GCTGCTTATGAGGAT	-0.00267525	0.00240034	10	0.0524104	0.0869806	-0.0056472	0.00297195	-0.00491537	0.00247573	5	0.00161631	0.0034267	5
G10150_P1G04-SC_37C	G10150_P1G04	10150	P1G04	P1_SC_37C	SC_37C	GGTTGCCCAGAAGTA	-0.0797534	0.0046301	9	7.19602e-07	9.79534e-06	-0.0194968	-0.0602566	-0.0866775	0.00494663	4	-0.0706828	0.00566172	5
G10150_P1G04-SC_37C	G10150_P1G04	10150	P1G04	P1_SC_37C	SC_37C	GTAATCTGACTCTAG	-0.0567045	0.0228914	8	0.0860529	0.132603	0.0077402	-0.0644447	-0.0634463	0.0107463	3	-0.00800147	0.0288832	5
G10150_P1G04-SC_37C	G10150_P1G04	10150	P1G04	P1_SC_37C	SC_37C	GTACAAGAAATTTTG	-0.00279653	0.00823062	8	0.759657	0.80867	-0.0434344	0.0406378	-0.00330464	0.00256468	4	0.013809	0.0146616	4
G10150_P1G04-SC_37C	G10150_P1G04	10150	P1G04	P1_SC_37C	SC_37C	GTCACCGGCACTAAC	-0.00246253	0.0124617	5	0.294504	0.371922	-0.0259069	0.0234444	0.0221994	0.0300618	2	-0.0028391	0.00371474	3
G10150_P1G04-SC_37C	G10150_P1G04	10150	P1G04	P1_SC_37C	SC_37C	GTGTGATTACTAAAT	-0.0378535	0.00319609	7	0.00013029	0.000592562	-0.0108598	-0.0269937	-0.0405234	0.00475095	4	-0.0363312	0.00358742	3
G10150_P1G04-SC_37C	G10150_P1G04	10150	P1G04	P1_SC_37C	SC_37C	GTTAAATCAACAGTT	-0.00700214	0.00255901	6	0.168734	0.233184	-0.0412742	0.034272	-0.00431638	0.00326107	3	-0.00981757	0.00333886	3
G10150_P1G04-SC_37C	G10150_P1G04	10150	P1G04	P1_SC_37C	SC_37C	GTTCAGCTTTGATCG	-0.0860232	0.00298287	9	4.35524e-08	1.2676e-06	-0.124119	0.0380957	-0.0871321	0.0032522	5	-0.0831763	0.00521098	4
G10150_P1G04-SC_37C	G10150_P1G04	10150	P1G04	P1_SC_37C	SC_37C	GTTGAACTGGTTGTT	-0.0275424	0.00429594	8	0.000710348	0.0024	-0.0331275	0.00558517	-0.0323569	0.0061823	5	-0.0260295	0.00346558	3
G10150_P1G04-SC_37C	G10150_P1G04	10150	P1G04	P1_SC_37C	SC_37C	GTTGGGCGCTTAAAG	0.000543829	0.00170286	10	0.602424	0.672798	-0.00339134	0.00393517	0.000576955	0.000883541	5	0.000118394	0.00316633	5
G10150_P1G04-SC_37C	G10150_P1G04	10150	P1G04	P1_SC_37C	SC_37C	GTTTAGCTTCCGTTG	-0.0472082	0.0170521	8	0.0886441	0.135923	0.000432998	-0.0476412	-0.0464915	0.00498034	4	-0.0770465	0.032134	4
G10150_P1G04-SC_37C	G10150_P1G04	10150	P1G04	P1_SC_37C	SC_37C	GTTTGTTTTGGGAAA	-0.137256	0.0111071	8	6.01032e-05	0.000317787	-0.140287	0.00303186	-0.145292	0.0169268	5	-0.133774	0.0111411	3
G10150_P1G04-SC_37C	G10150_P1G04	10150	P1G04	P1_SC_37C	SC_37C	TAACCTCGCGCTGAG	-0.0106972	0.00716618	9	0.0026303	0.00703127	0.0247705	-0.0354677	-0.0331767	0.0110125	4	-0.00885882	0.00314927	5
G10150_P1G04-SC_37C	G10150_P1G04	10150	P1G04	P1_SC_37C	SC_37C	TAATATTGTTTTGCG	-0.181301	0.0362229	5	0.0538737	0.0888762	-0.0703753	-0.110925	-0.112996	0.0440111	3	-0.189453	0.0152052	2
G10150_P1G04-SC_37C	G10150_P1G04	10150	P1G04	P1_SC_37C	SC_37C	TACACCAATTACACT	-0.116686	0.00924117	9	0.000111343	0.000521426			-0.112553	0.0185528	4	-0.117849	0.00984261	5
G10150_P1G04-SC_37C	G10150_P1G04	10150	P1G04	P1_SC_37C	SC_37C	TAGACGGACATCTTC	0.00361045	0.0022091	6	0.0412189	0.0709205	0.0214085	-0.0177981	0.00518788	0.0021999	3	0.000412163	0.00313246	3
G10150_P1G04-SC_37C	G10150_P1G04	10150	P1G04	P1_SC_37C	SC_37C	TATATTGAACTTTAC	-0.00197718	0.00253018	8	0.559931	0.633597	0.0115448	-0.013522	-0.00188036	0.00183096	4	-0.00266361	0.00487522	4
G10150_P1G04-SC_37C	G10150_P1G04	10150	P1G04	P1_SC_37C	SC_37C	TATGCCCTTCTTCTG	-0.0185701	0.00900552	10	0.00748644	0.0170772	0.00616433	-0.0247344	-0.0392979	0.0149292	5	-0.0157378	0.00551856	5
G10150_P1G04-SC_37C	G10150_P1G04	10150	P1G04	P1_SC_37C	SC_37C	TCAAAACGGAGTGTT	0.00170751	0.00177939	10	0.252763	0.327441	-0.00120033	0.00290784	0.00159133	0.00120885	5	0.00253558	0.00322722	5
G10150_P1G04-SC_37C	G10150_P1G04	10150	P1G04	P1_SC_37C	SC_37C	TCAAAGCATGAAAAA	-0.053256	0.00238377	9	9.06036e-11	2.32699e-08	-0.086374	0.033118	-0.0540164	0.00101398	4	-0.0467365	0.00296917	5
G10150_P1G04-SC_37C	G10150_P1G04	10150	P1G04	P1_SC_37C	SC_37C	TCAAATGATGAGGAT	-0.0245154	0.00620313	10	0.00838353	0.0188474	0.0191963	-0.0437117	-0.0300103	0.00918902	5	-0.0197462	0.00856067	5
G10150_P1G04-SC_37C	G10150_P1G04	10150	P1G04	P1_SC_37C	SC_37C	TCAACAACCTATGCA	-0.00273787	0.00366494	9	0.897742	0.92088	0.0238632	-0.0266011	-0.000701534	0.00701786	4	-0.00346397	0.00419062	5
G10150_P1G04-SC_37C	G10150_P1G04	10150	P1G04	P1_SC_37C	SC_37C	TCAGAGCATTGGCCT	-0.0440308	0.00852455	6	0.041298	0.0710368			-0.0280039	0.0108389	3	-0.0534877	0.00832591	3
G10150_P1G04-SC_37C	G10150_P1G04	10150	P1G04	P1_SC_37C	SC_37C	TCATAGGTATCTCGC	-0.00109187	0.00167086	10	0.233464	0.30594	-0.00351693	0.00242506	-0.0011861	0.0010914	5	-0.000376386	0.00300744	5
G10150_P1G04-SC_37C	G10150_P1G04	10150	P1G04	P1_SC_37C	SC_37C	TCGAAAGCACAGTAG	-0.0418138	0.0178708	3	0.149542	0.210706	-0.135006	0.0931924	-0.057555	0.0137951	2	-0.00976914	0.0196826	1
G10150_P1G04-SC_37C	G10150_P1G04	10150	P1G04	P1_SC_37C	SC_37C	TCGATAGAATTTACT	-0.117669	0.0054752	3	0.0261855	0.0486202	-0.0242833	-0.093386	-0.113585	0.00473645	2	-0.127076	0.00718779	1
G10150_P1G04-SC_37C	G10150_P1G04	10150	P1G04	P1_SC_37C	SC_37C	TCTTGGAGGTGAATG	-0.205192	0.00718336	5	0.000329662	0.00126864	-0.0830805	-0.122111	-0.183161	0.00978352	1	-0.212498	0.00563418	4
G10150_P1G04-SC_37C	G10150_P1G04	10150	P1G04	P1_SC_37C	SC_37C	TGGAGTCTTTGTTGA	-0.0380362	0.00327033	8	0.000370255	0.00139893	-0.063193	0.0251568	-0.0326327	0.00737652	3	-0.0390717	0.00322913	5
G10150_P1G04-SC_37C	G10150_P1G04	10150	P1G04	P1_SC_37C	SC_37C	TTAATTAGAGGTATG	-0.00934666	0.00751485	8	0.631733	0.699884	-0.0312409	0.0218943	-0.00561775	0.0154585	4	-0.00961694	0.00416181	4
G10150_P1G04-SC_37C	G10150_P1G04	10150	P1G04	P1_SC_37C	SC_37C	TTAATTGCACTTATG	-0.0496751	0.0286033	3	0.819324	0.859263	-0.072662	0.0229869	-0.0166325	0.0570287	1	-0.0662744	0.0404204	2
G10150_P1G04-SC_37C	G10150_P1G04	10150	P1G04	P1_SC_37C	SC_37C	TTAGTCTTTCCATCA	-0.0284959	0.0024601	9	1.70096e-06	1.86851e-05	-0.204752	0.176256	-0.029257	0.0013395	4	-0.023038	0.00358696	5
G10150_P1G04-SC_37C	G10150_P1G04	10150	P1G04	P1_SC_37C	SC_37C	TTATATTTATTTGCT	0.00443996	0.00174674	10	0.00330247	0.0085315	-0.0146704	0.0191104	0.00473748	0.00151058	5	0.00328043	0.0029821	5
G10150_P1G04-SC_37C	G10150_P1G04	10150	P1G04	P1_SC_37C	SC_37C	TTTAACTCACCGTAA	-0.0178177	0.00676958	10	0.0918622	0.140047	-0.0171085	-0.000709167	-0.0183278	0.00361504	5	-0.0108413	0.0133688	5
G10150_P1G04-SC_37C	G10150_P1G04	10150	P1G04	P1_SC_37C	SC_37C	TTTATAAATCAATAG	0.00269961	0.00165675	10	0.0179542	0.0354952	0.00352976	-0.00083015	0.00259035	0.00125972	5	0.00328348	0.00291198	5
G10150_P1G04-SC_37C	G10150_P1G04	10150	P1G04	P1_SC_37C	SC_37C	TTTTGCATTTAGGCG	-0.0592391	0.00426008	10	7.015e-06	5.7115e-05	-0.0117231	-0.047516	-0.0606486	0.00622287	5	-0.057793	0.00630291	5
G5150_P1G04-SC_37C	G5150_P1G04	5150	P1G04	P1_SC_37C	SC_37C	AAAACATTATCAAAG	0.00092383	0.00218261	6	0.682479	0.744257	-0.000652642	0.00157647	-0.00110898	0.00307688	4	0.00163947	0.00182561	2
G5150_P1G04-SC_37C	G5150_P1G04	5150	P1G04	P1_SC_37C	SC_37C	AAAAGAAAAATGTAT	0.00679374	0.00180556	8	0.000521033	0.00185868	0.0418506	-0.0350568	0.0100534	0.00206428	5	0.00433738	0.00179197	3
G5150_P1G04-SC_37C	G5150_P1G04	5150	P1G04	P1_SC_37C	SC_37C	AAAAGCGACATTTCT	0.0125911	0.0293929	7	0.537284	0.612851	-0.0616103	0.0742013	0.0171813	0.016389	5	-0.0856558	0.0758222	2
G5150_P1G04-SC_37C	G5150_P1G04	5150	P1G04	P1_SC_37C	SC_37C	AATGATACCATTTTT	-0.0744324	0.0129497	8	0.00455014	0.0111702			-0.0758162	0.00574904	4	-0.0508477	0.0237345	4
G5150_P1G04-SC_37C	G5150_P1G04	5150	P1G04	P1_SC_37C	SC_37C	ACAACCTACCTGCTA	-0.000548121	0.00209946	6	0.467116	0.545911	-0.00161883	0.00107071	-0.00161657	0.00228445	5	0.00409531	0.00476239	1
G5150_P1G04-SC_37C	G5150_P1G04	5150	P1G04	P1_SC_37C	SC_37C	ACAAGTTTTACAGTT	-0.0170255	0.00565089	7	0.0416354	0.071519	0.021037	-0.0380625	-0.0109862	0.0040691	5	-0.0359781	0.00720841	2
G5150_P1G04-SC_37C	G5150_P1G04	5150	P1G04	P1_SC_37C	SC_37C	ACAGGGCAGCTCCCG	-0.01108	0.00387826	8	0.185407	0.252362	-0.0292694	0.0181894	-0.00766429	0.00463708	4	-0.0165748	0.00588137	4
G5150_P1G04-SC_37C	G5150_P1G04	5150	P1G04	P1_SC_37C	SC_37C	ACAGTTGACGGACAG	-0.00399305	0.00146168	9	0.0173935	0.0345953	0.00149213	-0.00548518	-0.00494055	0.0021332	5	-0.00312286	0.00204432	4
G5150_P1G04-SC_37C	G5150_P1G04	5150	P1G04	P1_SC_37C	SC_37C	ACCACCGGTCCTGCC	-0.00307591	0.00147745	7	0.0546578	0.0900506	-0.00133408	-0.00174183	-0.00406698	0.00225428	4	-0.00241193	0.00184516	3
G5150_P1G04-SC_37C	G5150_P1G04	5150	P1G04	P1_SC_37C	SC_37C	AGAACATCATCTACA	-0.0827659	0.0107582	6	0.00110501	0.00344387			-0.0997331	0.0135106	4	-0.0785809	0.00670988	2
G5150_P1G04-SC_37C	G5150_P1G04	5150	P1G04	P1_SC_37C	SC_37C	AGAAGACGACGATGA	-0.0518642	0.00584125	9	3.52103e-06	3.32033e-05	-0.0269064	-0.0249578	-0.032527	0.00324109	5	-0.0607245	0.0021939	4
G5150_P1G04-SC_37C	G5150_P1G04	5150	P1G04	P1_SC_37C	SC_37C	AGATTCATCCCATGG	-0.00113887	0.002108	4	0.578761	0.650864	-0.00105522	-8.36516e-05	-0.00170115	0.00280548	3	0.000470321	0.00474608	1
G5150_P1G04-SC_37C	G5150_P1G04	5150	P1G04	P1_SC_37C	SC_37C	AGTGTATGATAATAT	-0.0320771	0.00328618	10	1.78365e-07	3.38704e-06	-0.01028	-0.0217971	-0.0289607	0.00140906	5	-0.0441559	0.00277408	5
G5150_P1G04-SC_37C	G5150_P1G04	5150	P1G04	P1_SC_37C	SC_37C	AGTGTTAATCAGACC	-0.0338889	0.00908786	3	0.245293	0.319191	-0.0454435	0.0115546	-0.036704	0.0149253	2	-0.0282577	0.0211094	1
G5150_P1G04-SC_37C	G5150_P1G04	5150	P1G04	P1_SC_37C	SC_37C	AGTTTATAAAAAATT	0.00798659	0.00353287	4	0.0968237	0.146233	0.0647237	-0.0567371	0.0127878	0.00493569	2	0.00480461	0.00401812	2
G5150_P1G04-SC_37C	G5150_P1G04	5150	P1G04	P1_SC_37C	SC_37C	ATAGAGCGGCGTTGA	-0.0173645	0.00603231	6	0.0827986	0.128398	-0.011058	-0.00630651	-0.0184598	0.00733131	4	-0.0132578	0.0141963	2
G5150_P1G04-SC_37C	G5150_P1G04	5150	P1G04	P1_SC_37C	SC_37C	ATAGTCGATTAAGAT	-0.0385208	0.00461885	5	0.00706183	0.0162305	-0.0514128	0.012892	-0.0373301	0.00575283	4	-0.0432028	0.0114075	1
G5150_P1G04-SC_37C	G5150_P1G04	5150	P1G04	P1_SC_37C	SC_37C	ATATTGAGTAAGTAC	-0.0111263	0.00517049	5	0.0473093	0.0798119	0.00108997	-0.0122163	-0.00562469	0.00203695	4	-0.0301493	0.00378769	1
G5150_P1G04-SC_37C	G5150_P1G04	5150	P1G04	P1_SC_37C	SC_37C	ATCGTTGGCATTTGG	-0.0799647	0.00900388	8	9.63442e-06	7.36746e-05	-0.105906	0.0259411	-0.0904624	0.00606325	5	-0.050383	0.0101782	3
G5150_P1G04-SC_37C	G5150_P1G04	5150	P1G04	P1_SC_37C	SC_37C	ATGGCGATGGTCTTG	-0.00133498	0.00255352	5	0.133374	0.191285	-0.00278687	0.00145189	-0.00441912	0.00199664	2	0.00340748	0.0024759	3
G5150_P1G04-SC_37C	G5150_P1G04	5150	P1G04	P1_SC_37C	SC_37C	ATTATCAAGTGCCAG	-0.0559957	0.0179171	6	0.00167452	0.00485331	-0.0673298	0.0113341	-0.0975153	0.0149318	4	-0.0528085	0.00413706	2
G5150_P1G04-SC_37C	G5150_P1G04	5150	P1G04	P1_SC_37C	SC_37C	CAAGGATCCCCGTAG	-0.00899989	0.0043359	6	0.125737	0.181959	-0.0256483	0.0166484	-0.00984169	0.00521072	5	-0.00489669	0.0115041	1
G5150_P1G04-SC_37C	G5150_P1G04	5150	P1G04	P1_SC_37C	SC_37C	CAAGTTCGGCGAAAT	0.00874457	0.00338229	4	0.0720747	0.114025	-0.00314285	0.0118874	0.00874457	0.00338229	4
G5150_P1G04-SC_37C	G5150_P1G04	5150	P1G04	P1_SC_37C	SC_37C	CAATCTTGAATTGAT	-0.00479327	0.00457008	10	0.497693	0.575277	0.0141933	-0.0189866	-0.00477567	0.00744859	5	-0.00480549	0.00620418	5
G5150_P1G04-SC_37C	G5150_P1G04	5150	P1G04	P1_SC_37C	SC_37C	CAATTTCAACGTTGT	-0.117061	0.0147674	4	0.0134253	0.0278037	-0.0641989	-0.0528621	-0.127376	0.0149483	3	-0.0861665	0.0258701	1
G5150_P1G04-SC_37C	G5150_P1G04	5150	P1G04	P1_SC_37C	SC_37C	CATATGCATTCCTTG	0.0078161	0.00196074	10	7.31512e-06	5.90567e-05	-0.00930645	0.0171226	0.0129021	0.001943	5	0.0037881	0.00172914	5
G5150_P1G04-SC_37C	G5150_P1G04	5150	P1G04	P1_SC_37C	SC_37C	CATCAATGAGGCAGT	-0.0988967	0.00497995	9	5.03805e-07	7.4271e-06	-0.170366	0.0714693	-0.100412	0.00327386	5	-0.0871173	0.00912681	4
G5150_P1G04-SC_37C	G5150_P1G04	5150	P1G04	P1_SC_37C	SC_37C	CATTTATGGCTATCT	-0.0640951	0.00824288	4	0.00431653	0.0106794	-0.0900852	0.0259901	-0.0640951	0.00824288	4
G5150_P1G04-SC_37C	G5150_P1G04	5150	P1G04	P1_SC_37C	SC_37C	CCAACACAGGCTTCG	-0.0472083	0.0043772	7	3.26543e-05	0.000194536	0.00488293	-0.0520913	-0.0441575	0.00301725	5	-0.0626755	0.00679371	2
G5150_P1G04-SC_37C	G5150_P1G04	5150	P1G04	P1_SC_37C	SC_37C	CCAAGACCGTGTAAA	-0.142325	0.0152596	4	0.00349223	0.00894013	-0.232802	0.0904777	-0.156125	0.00931315	3	-0.101095	0.0160971	1
G5150_P1G04-SC_37C	G5150_P1G04	5150	P1G04	P1_SC_37C	SC_37C	CCAGGATGTACCGCC	-0.0212487	0.0123503	4	0.103987	0.15506	-0.104767	0.0835179	-0.0205056	0.00165036	2	-0.0496494	0.0102031	2
G5150_P1G04-SC_37C	G5150_P1G04	5150	P1G04	P1_SC_37C	SC_37C	CCGTTAGTATCGCTA	-0.00618077	0.00420462	7	0.801512	0.844273	-0.019524	0.0133432	0.000970536	0.00404889	5	-0.0138731	0.00419925	2
G5150_P1G04-SC_37C	G5150_P1G04	5150	P1G04	P1_SC_37C	SC_37C	CGAATGCCATACAAA	-0.00900626	0.00669952	3	0.594857	0.665362	-0.0187919	0.00978569	-0.00272869	0.0038469	2	-0.0215937	0.00544734	1
G5150_P1G04-SC_37C	G5150_P1G04	5150	P1G04	P1_SC_37C	SC_37C	CGATGATGATGATGA	-0.00164179	0.00212494	8	0.819576	0.859454	-0.00559316	0.00395137	-0.000617692	0.00314507	5	-0.00235637	0.00262713	3
G5150_P1G04-SC_37C	G5150_P1G04	5150	P1G04	P1_SC_37C	SC_37C	CGCGATCAATCCTCT	-0.0414663	0.00851132	7	0.0156824	0.0317352	-0.0319146	-0.00955163	-0.0392057	0.0118693	5	-0.0429865	0.00973365	2
G5150_P1G04-SC_37C	G5150_P1G04	5150	P1G04	P1_SC_37C	SC_37C	CTAAGCAGTCTTCTC	-0.0635509	0.0121186	8	0.000177231	0.000759203	-0.133331	0.0697797	-0.0929605	0.0139205	5	-0.063131	0.00166351	3
G5150_P1G04-SC_37C	G5150_P1G04	5150	P1G04	P1_SC_37C	SC_37C	CTACTTACAACGGAA	0.0156843	0.00359437	6	0.00922168	0.0204575	2.16745e-05	0.0156626	0.0174727	0.00386131	5	0.00715142	0.00843418	1
G5150_P1G04-SC_37C	G5150_P1G04	5150	P1G04	P1_SC_37C	SC_37C	CTATCAAGGCTTAAT	-0.0259362	0.0140638	3	0.228179	0.300373	0.0109081	-0.0368443	-0.0374043	0.0140532	2	-0.00299548	0.0198762	1
G5150_P1G04-SC_37C	G5150_P1G04	5150	P1G04	P1_SC_37C	SC_37C	CTCGCTAATACTCCT	-0.0025494	0.00285217	9	0.000795782	0.00262774	-0.0375804	0.035031	-0.0110673	0.00280379	5	0.000196376	0.00159189	4
G5150_P1G04-SC_37C	G5150_P1G04	5150	P1G04	P1_SC_37C	SC_37C	CTCTTGAGAATACTT	-0.0935514	0.0120852	7	0.00177443	0.00508491	-0.0948968	0.00134536	-0.0945244	0.0173385	5	-0.0933709	0.0074681	2
G5150_P1G04-SC_37C	G5150_P1G04	5150	P1G04	P1_SC_37C	SC_37C	CTTGATCAATCAAAA	-0.0639906	0.00315275	9	1.37857e-06	1.58966e-05	-0.0824445	0.0184539	-0.0608416	0.0044553	5	-0.0670008	0.00435603	4
G5150_P1G04-SC_37C	G5150_P1G04	5150	P1G04	P1_SC_37C	SC_37C	CTTGCAAGTGTAATT	0.00332855	0.00359602	5	0.386848	0.466637	0.000560442	0.00276811	0.00332855	0.00359602	5
G5150_P1G04-SC_37C	G5150_P1G04	5150	P1G04	P1_SC_37C	SC_37C	CTTTCTTGTGTATTT	-0.059923	0.0129407	6	0.0320989	0.0575518	-0.0498822	-0.0100409	-0.0567829	0.0197057	4	-0.0612018	0.0125751	2
G5150_P1G04-SC_37C	G5150_P1G04	5150	P1G04	P1_SC_37C	SC_37C	GAACTCAGGTTCCAT	-0.0382721	0.00652936	6	0.0101891	0.0222371	-0.0442945	0.00602241	-0.044559	0.0135316	3	-0.0379345	0.00313541	3
G5150_P1G04-SC_37C	G5150_P1G04	5150	P1G04	P1_SC_37C	SC_37C	GAGAATGAAGGACAG	-0.0636112	0.00706547	10	6.26854e-08	1.66143e-06	0.00446468	-0.0680759	-0.0886107	0.00588799	5	-0.0544445	0.0035654	5
G5150_P1G04-SC_37C	G5150_P1G04	5150	P1G04	P1_SC_37C	SC_37C	GAGTGCTTCAAAGTT	0.00747596	0.0022205	9	0.000347524	0.00132591	0.0186933	-0.0112174	0.0120314	0.0023579	5	0.00321754	0.00227975	4
G5150_P1G04-SC_37C	G5150_P1G04	5150	P1G04	P1_SC_37C	SC_37C	GCCCTCGAAACCTAT	-0.0738651	0.0152243	6	0.00259182	0.00694926	-0.0598668	-0.0139983	-0.101908	0.0173133	4	-0.0677449	0.00808827	2
G5150_P1G04-SC_37C	G5150_P1G04	5150	P1G04	P1_SC_37C	SC_37C	GCTGCGGAGCCTCAG	-0.131132	0.0384851	3	0.383626	0.463558			-0.0627848	0.0432067	1	-0.165373	0.0305815	2
G5150_P1G04-SC_37C	G5150_P1G04	5150	P1G04	P1_SC_37C	SC_37C	GCTGCTTATGAGGAT	-0.000305219	0.00190188	8	0.166567	0.230702	-0.0056472	0.00534198	-0.00309607	0.00263454	5	0.000696442	0.00157832	3
G5150_P1G04-SC_37C	G5150_P1G04	5150	P1G04	P1_SC_37C	SC_37C	GGTGGAAGTAGCAGT	0.00573607	0.00172305	3	0.224562	0.29652	0.00243518	0.00330089	0.00633464	0.00256933	2	0.00453201	0.00364407	1
G5150_P1G04-SC_37C	G5150_P1G04	5150	P1G04	P1_SC_37C	SC_37C	GGTTGCCCAGAAGTA	-0.031734	0.00511399	6	0.0104062	0.0226112	-0.0194968	-0.0122372	-0.0300471	0.00629893	4	-0.036835	0.0109535	2
G5150_P1G04-SC_37C	G5150_P1G04	5150	P1G04	P1_SC_37C	SC_37C	GTAATCTGACTCTAG	-0.0464613	0.00793998	5	0.0205562	0.0396759	0.0077402	-0.0542015	-0.045135	0.0100997	4	-0.0517376	0.0201436	1
G5150_P1G04-SC_37C	G5150_P1G04	5150	P1G04	P1_SC_37C	SC_37C	GTACAAGAAATTTTG	-0.0125809	0.00429307	6	0.00139773	0.00418344	-0.0434344	0.0308535	-0.0215647	0.00311995	3	-0.00447298	0.00296396	3
G5150_P1G04-SC_37C	G5150_P1G04	5150	P1G04	P1_SC_37C	SC_37C	GTGTGATTACTAAAT	-0.0389002	0.00447506	6	0.00241916	0.00656976	-0.0108598	-0.0280405	-0.0311257	0.00536492	4	-0.0398231	0.0018484	2
G5150_P1G04-SC_37C	G5150_P1G04	5150	P1G04	P1_SC_37C	SC_37C	GTTAAATCAACAGTT	-0.00598372	0.00943597	8	0.0739154	0.116612	-0.0412742	0.0352904	-0.0256849	0.016778	4	-0.00567227	0.00210955	4
G5150_P1G04-SC_37C	G5150_P1G04	5150	P1G04	P1_SC_37C	SC_37C	GTTCAGCTTTGATCG	-0.0805707	0.00421422	7	3.59742e-05	0.000210291	-0.124119	0.0435482	-0.0662491	0.00621248	2	-0.0843541	0.00319308	5
G5150_P1G04-SC_37C	G5150_P1G04	5150	P1G04	P1_SC_37C	SC_37C	GTTGAACTGGTTGTT	-0.023284	0.00206674	6	0.000767167	0.00255319	-0.0331275	0.00984347	-0.021212	0.00281023	4	-0.0244095	0.00207111	2
G5150_P1G04-SC_37C	G5150_P1G04	5150	P1G04	P1_SC_37C	SC_37C	GTTGGGCGCTTAAAG	0.000897423	0.0019218	10	0.521852	0.598537	-0.00339134	0.00428876	0.00147297	0.00134667	5	-0.00272846	0.00338007	5
G5150_P1G04-SC_37C	G5150_P1G04	5150	P1G04	P1_SC_37C	SC_37C	GTTTAGCTTCCGTTG	-0.0437591	0.00322951	7	0.000109381	0.000513396	0.000432998	-0.0441921	-0.0439157	0.00335115	5	-0.0423372	0.0100984	2
G5150_P1G04-SC_37C	G5150_P1G04	5150	P1G04	P1_SC_37C	SC_37C	GTTTGTTTTGGGAAA	-0.162012	0.0118069	6	0.00124407	0.00381333	-0.140287	-0.0217247	-0.175461	0.0254871	2	-0.157774	0.0143079	4
G5150_P1G04-SC_37C	G5150_P1G04	5150	P1G04	P1_SC_37C	SC_37C	TAACCTCGCGCTGAG	0.00481685	0.00239535	9	0.00621531	0.0145671	0.0247705	-0.0199536	0.0082174	0.00227192	5	-0.00108631	0.00299337	4
G5150_P1G04-SC_37C	G5150_P1G04	5150	P1G04	P1_SC_37C	SC_37C	TAATATTGTTTTGCG	-0.0650919	0.0315215	5	0.00671971	0.0155503	-0.0703753	0.0052834	-0.138234	0.0251825	3	-0.0643692	0.00250321	2
G5150_P1G04-SC_37C	G5150_P1G04	5150	P1G04	P1_SC_37C	SC_37C	TATATTGAACTTTAC	0.00292413	0.00281248	9	0.52784	0.604098	0.0115448	-0.00862072	0.00252776	0.00327137	5	0.00398899	0.00536202	4
G5150_P1G04-SC_37C	G5150_P1G04	5150	P1G04	P1_SC_37C	SC_37C	TATGCCCTTCTTCTG	-0.0381566	0.0159707	6	0.0992138	0.149205	0.00616433	-0.0443209	-0.04107	0.019232	5	-0.023616	0.0429644	1
G5150_P1G04-SC_37C	G5150_P1G04	5150	P1G04	P1_SC_37C	SC_37C	TCAAAACGGAGTGTT	-0.00109667	0.00188822	10	0.702936	0.761631	-0.00120033	0.00010366	-0.00098682	0.00315968	5	-0.00116317	0.00245856	5
G5150_P1G04-SC_37C	G5150_P1G04	5150	P1G04	P1_SC_37C	SC_37C	TCAAAGCATGAAAAA	-0.0298381	0.00619567	8	0.000300099	0.0011741	-0.086374	0.0565359	-0.012282	0.00222952	4	-0.044043	0.00200547	4
G5150_P1G04-SC_37C	G5150_P1G04	5150	P1G04	P1_SC_37C	SC_37C	TCAAATGATGAGGAT	-0.0100181	0.00338124	8	0.0179303	0.0354649	0.0191963	-0.0292144	-0.00665735	0.00200934	5	-0.0217332	0.00375151	3
G5150_P1G04-SC_37C	G5150_P1G04	5150	P1G04	P1_SC_37C	SC_37C	TCAACAACCTATGCA	0.00527406	0.0019606	9	0.308108	0.385933	0.0238632	-0.0185892	0.00247459	0.0031156	5	0.00612471	0.00171743	4
G5150_P1G04-SC_37C	G5150_P1G04	5150	P1G04	P1_SC_37C	SC_37C	TCAGAGCATTGGCCT	-0.0601448	0.0202238	3	0.149457	0.210609			-0.0958714	0.0229556	1	-0.042158	0.016288	2
G5150_P1G04-SC_37C	G5150_P1G04	5150	P1G04	P1_SC_37C	SC_37C	TCATAGGTATCTCGC	0.00244803	0.00207366	10	0.00379233	0.00958626	-0.00351693	0.00596497	0.00591573	0.00171536	5	-0.00336742	0.0022214	5
G5150_P1G04-SC_37C	G5150_P1G04	5150	P1G04	P1_SC_37C	SC_37C	TCGAAAGCACAGTAG	-0.0909109	0.0293142	4	0.00594143	0.0140069	-0.135006	0.0440953	-0.104198	0.00463021	2	-0.0213089	0.0105972	2
G5150_P1G04-SC_37C	G5150_P1G04	5150	P1G04	P1_SC_37C	SC_37C	TCGATAGAATTTACT	-0.101798	0.00910115	6	1.32509e-05	9.51938e-05	-0.0242833	-0.077515	-0.11499	0.00391778	3	-0.0779795	0.00526432	3
G5150_P1G04-SC_37C	G5150_P1G04	5150	P1G04	P1_SC_37C	SC_37C	TCTTGGAGGTGAATG	-0.109588	0.00813113	10	2.4113e-08	8.55771e-07	-0.0830805	-0.0265076	-0.114558	0.00292943	5	-0.0792343	0.00723962	5
G5150_P1G04-SC_37C	G5150_P1G04	5150	P1G04	P1_SC_37C	SC_37C	TGGAGTCTTTGTTGA	-0.0293938	0.00545367	8	0.0106681	0.0230916	-0.063193	0.0337992	-0.0131873	0.0044515	4	-0.0374201	0.00313271	4
G5150_P1G04-SC_37C	G5150_P1G04	5150	P1G04	P1_SC_37C	SC_37C	TTAATTAGAGGTATG	-0.0188132	0.00364745	3	0.233151	0.305658	-0.0312409	0.0124277	-0.0133615	0.00523688	1	-0.0219011	0.00394125	2
G5150_P1G04-SC_37C	G5150_P1G04	5150	P1G04	P1_SC_37C	SC_37C	TTAATTGCACTTATG	-0.0666908	0.0363812	3	0.0948394	0.143802	-0.072662	0.00597117	-0.0304582	0.00469683	2	-0.139281	0.00664807	1
G5150_P1G04-SC_37C	G5150_P1G04	5150	P1G04	P1_SC_37C	SC_37C	TTAGTCTTTCCATCA	-0.0521746	0.00852007	8	1.31142e-06	1.52676e-05	-0.204752	0.152578	-0.0768785	0.00475083	5	-0.0394504	0.00340957	3
G5150_P1G04-SC_37C	G5150_P1G04	5150	P1G04	P1_SC_37C	SC_37C	TTATATTTATTTGCT	0.00615536	0.00144116	5	0.0029924	0.00784764	-0.0146704	0.0208258	0.00615536	0.00144116	5
G5150_P1G04-SC_37C	G5150_P1G04	5150	P1G04	P1_SC_37C	SC_37C	TTTAACTCACCGTAA	-0.0173552	0.00979436	6	0.291988	0.369418	-0.0171085	-0.000246651	-0.0129132	0.0107033	5	-0.0394326	0.023862	1
G5150_P1G04-SC_37C	G5150_P1G04	5150	P1G04	P1_SC_37C	SC_37C	TTTATAAATCAATAG	0.00469627	0.00140453	10	6.50446e-05	0.000339021	0.00352976	0.0011665	0.00649422	0.00131085	5	0.00122176	0.00182226	5
G5150_P1G04-SC_37C	G5150_P1G04	5150	P1G04	P1_SC_37C	SC_37C	TTTTGCATTTAGGCG	-0.0529799	0.00457485	10	8.07662e-08	1.912e-06	-0.0117231	-0.0412568	-0.067914	0.00476895	5	-0.047543	0.00287746	5
G5150_P1D03-SC_37C	G5150_P1D03	5150	P1D03	P1_SC_37C	SC_37C	AAAACATTATCAAAG	-0.00531743	0.00143679	10	0.0648773	0.104066	-0.000652642	-0.00466479	-0.00399115	0.00234734	5	-0.00604182	0.00173477	5
G5150_P1D03-SC_37C	G5150_P1D03	5150	P1D03	P1_SC_37C	SC_37C	AAAAGAAAAATGTAT	0.0278946	0.00195162	10	5.95754e-08	1.60287e-06	0.0418506	-0.0139559	0.0225127	0.00152908	5	0.0325212	0.00141772	5
G5150_P1D03-SC_37C	G5150_P1D03	5150	P1D03	P1_SC_37C	SC_37C	AAAAGCGACATTTCT	-0.0540164	0.006117	9	1.54854e-05	0.000107167	-0.0616103	0.00759386	-0.0378433	0.0039097	5	-0.0690463	0.00376898	4
G5150_P1D03-SC_37C	G5150_P1D03	5150	P1D03	P1_SC_37C	SC_37C	AATGATACCATTTTT	-0.257616	0.0134931	7	2.97231e-05	0.000180263			-0.206369	0.0203547	2	-0.26545	0.00795834	5
G5150_P1D03-SC_37C	G5150_P1D03	5150	P1D03	P1_SC_37C	SC_37C	ACAACCTACCTGCTA	-0.00383282	0.00128355	10	0.307419	0.385225	-0.00161883	-0.00221398	-0.00147915	0.00178016	5	-0.00537008	0.00143867	5
G5150_P1D03-SC_37C	G5150_P1D03	5150	P1D03	P1_SC_37C	SC_37C	ACAAGTTTTACAGTT	0.00084876	0.00198839	10	0.0950593	0.144005	0.021037	-0.0201882	0.00319061	0.00142632	5	-0.0051447	0.00228179	5
G5150_P1D03-SC_37C	G5150_P1D03	5150	P1D03	P1_SC_37C	SC_37C	ACAGGGCAGCTCCCG	-0.0367382	0.00382087	10	0.000338943	0.00129834	-0.0292694	-0.00746882	-0.0297029	0.00607864	5	-0.0394639	0.00378356	5
G5150_P1D03-SC_37C	G5150_P1D03	5150	P1D03	P1_SC_37C	SC_37C	ACAGTTGACGGACAG	-0.00179035	0.000878327	10	0.0254431	0.0474185	0.00149213	-0.00328248	-0.00233822	0.00108299	5	-0.000930981	0.00135637	5
G5150_P1D03-SC_37C	G5150_P1D03	5150	P1D03	P1_SC_37C	SC_37C	ACCACCGGTCCTGCC	-0.0250091	0.00373595	10	0.00624263	0.0146146	-0.00133408	-0.023675	-0.0181583	0.0064291	5	-0.0264986	0.00299787	5
G5150_P1D03-SC_37C	G5150_P1D03	5150	P1D03	P1_SC_37C	SC_37C	AGAACATCATCTACA	-0.112743	0.0218623	7	0.0148024	0.0302283			-0.111793	0.0115433	4	-0.133211	0.0535571	3
G5150_P1D03-SC_37C	G5150_P1D03	5150	P1D03	P1_SC_37C	SC_37C	AGAAGACGACGATGA	-0.0375644	0.00410577	10	1.66773e-09	1.46302e-07	-0.0269064	-0.0106581	-0.0523528	0.0022646	5	-0.0302639	0.00159114	5
G5150_P1D03-SC_37C	G5150_P1D03	5150	P1D03	P1_SC_37C	SC_37C	AGATTCATCCCATGG	-0.0030771	0.00196539	10	0.0120926	0.0255925	-0.00105522	-0.00202188	-0.00741211	0.00306772	5	-0.00183791	0.00164017	5
G5150_P1D03-SC_37C	G5150_P1D03	5150	P1D03	P1_SC_37C	SC_37C	AGTGTATGATAATAT	-0.0624658	0.00260027	10	4.87874e-10	6.60591e-08	-0.01028	-0.0521858	-0.0551572	0.00186343	5	-0.0688984	0.0017482	5
G5150_P1D03-SC_37C	G5150_P1D03	5150	P1D03	P1_SC_37C	SC_37C	AGTGTTAATCAGACC	-0.0329623	0.00582623	8	0.0122784	0.0259109	-0.0454435	0.0124811	-0.0333682	0.00209276	3	-0.0255375	0.00895156	5
G5150_P1D03-SC_37C	G5150_P1D03	5150	P1D03	P1_SC_37C	SC_37C	AGTTTATAAAAAATT	0.0363759	0.00320374	9	1.30145e-05	9.37397e-05	0.0647237	-0.0283478	0.0305145	0.00287829	5	0.0444177	0.00337141	4
G5150_P1D03-SC_37C	G5150_P1D03	5150	P1D03	P1_SC_37C	SC_37C	ATAATTTTCATCCAC	-0.0413212	0.0227473	5	0.0615122	0.0995011	-0.0111715	-0.0301497	-0.0191259	0.00657883	4	-0.129953	0.0131466	1
G5150_P1D03-SC_37C	G5150_P1D03	5150	P1D03	P1_SC_37C	SC_37C	ATAGAGCGGCGTTGA	-0.0292582	0.00397563	10	7.9447e-05	0.000400676	-0.011058	-0.0182002	-0.0240903	0.00256906	5	-0.0421027	0.00405019	5
G5150_P1D03-SC_37C	G5150_P1D03	5150	P1D03	P1_SC_37C	SC_37C	ATATTGAGTAAGTAC	-0.0274388	0.0045138	10	0.0015055	0.00444091	0.00108997	-0.0285287	-0.029714	0.00468623	5	-0.0213348	0.00767567	5
G5150_P1D03-SC_37C	G5150_P1D03	5150	P1D03	P1_SC_37C	SC_37C	ATCGTTGGCATTTGG	-0.0506268	0.00189352	10	6.00018e-08	1.61087e-06	-0.105906	0.0552789	-0.0486683	0.00302024	5	-0.0518088	0.00234627	5
G5150_P1D03-SC_37C	G5150_P1D03	5150	P1D03	P1_SC_37C	SC_37C	ATGGCGATGGTCTTG	0.00369437	0.00753886	5	0.201788	0.270724	-0.00278687	0.00648124	-0.0144212	0.0144408	2	0.00457731	0.00318808	3
G5150_P1D03-SC_37C	G5150_P1D03	5150	P1D03	P1_SC_37C	SC_37C	ATTATCAAGTGCCAG	-0.0723978	0.00705404	9	0.000173462	0.000746558	-0.0673298	-0.005068	-0.0695706	0.00771232	5	-0.0806215	0.0131534	4
G5150_P1D03-SC_37C	G5150_P1D03	5150	P1D03	P1_SC_37C	SC_37C	ATTATCATCGCCATC	-0.104219	0.0147512	8	0.00241456	0.00656013	-0.0768754	-0.0273435	-0.0900339	0.0143841	4	-0.134324	0.020955	4
G5150_P1D03-SC_37C	G5150_P1D03	5150	P1D03	P1_SC_37C	SC_37C	CAAGGATCCCCGTAG	-0.0149584	0.00245166	9	0.0069561	0.0160141	-0.0256483	0.01069	-0.0101016	0.00270501	4	-0.0196404	0.00265591	5
G5150_P1D03-SC_37C	G5150_P1D03	5150	P1D03	P1_SC_37C	SC_37C	CAAGTTCGGCGAAAT	-0.00662115	0.00344765	6	0.298516	0.376081	-0.00314285	-0.00347831	-0.00629775	0.00289738	3	-0.00850191	0.00698722	3
G5150_P1D03-SC_37C	G5150_P1D03	5150	P1D03	P1_SC_37C	SC_37C	CAATCTTGAATTGAT	0.00558864	0.00200405	10	0.277775	0.354207	0.0141933	-0.00860464	0.00297173	0.00272701	5	0.00810288	0.00267297	5
G5150_P1D03-SC_37C	G5150_P1D03	5150	P1D03	P1_SC_37C	SC_37C	CAATTTCAACGTTGT	-0.0425948	0.00851457	9	0.00555998	0.0132344	-0.0641989	0.0216041	-0.0435792	0.00457831	5	-0.0274441	0.017961	4
G5150_P1D03-SC_37C	G5150_P1D03	5150	P1D03	P1_SC_37C	SC_37C	CATATGCATTCCTTG	-0.00453945	0.00214187	10	0.142532	0.202362	-0.00930645	0.004767	-0.00498071	0.00297587	5	-0.00396848	0.0033851	5
G5150_P1D03-SC_37C	G5150_P1D03	5150	P1D03	P1_SC_37C	SC_37C	CATCAATGAGGCAGT	-0.200953	0.0124075	4	0.000510227	0.00182483	-0.170366	-0.0305869	-0.200953	0.0124075	4
G5150_P1D03-SC_37C	G5150_P1D03	5150	P1D03	P1_SC_37C	SC_37C	CATTGTCGGACGCTT	-0.00450063	0.0058894	4	0.258085	0.332985	0.0853687	-0.0898693	-0.00758122	0.00312478	2	0.00771975	0.00622365	2
G5150_P1D03-SC_37C	G5150_P1D03	5150	P1D03	P1_SC_37C	SC_37C	CATTTATGGCTATCT	-0.0997108	0.0142297	7	8.65776e-05	0.000429509	-0.0900852	-0.00962565	-0.10788	0.00812733	5	-0.0451204	0.0210092	2
G5150_P1D03-SC_37C	G5150_P1D03	5150	P1D03	P1_SC_37C	SC_37C	CCAACACAGGCTTCG	-0.00434811	0.0058653	10	0.686589	0.748083	0.00488293	-0.00923104	-0.00336967	0.00347995	5	-0.0139714	0.0109136	5
G5150_P1D03-SC_37C	G5150_P1D03	5150	P1D03	P1_SC_37C	SC_37C	CCAAGACCGTGTAAA	-0.203619	0.0252225	4	0.0229468	0.0435812	-0.232802	0.0291829	-0.201229	0.0100246	2	-0.247032	0.0427251	2
G5150_P1D03-SC_37C	G5150_P1D03	5150	P1D03	P1_SC_37C	SC_37C	CCAGGATGTACCGCC	-0.128698	0.00573597	8	1.21167e-05	8.86828e-05	-0.104767	-0.023931	-0.128894	0.00205093	3	-0.124643	0.00932478	5
G5150_P1D03-SC_37C	G5150_P1D03	5150	P1D03	P1_SC_37C	SC_37C	CCGTTAGTATCGCTA	-0.0137828	0.00260293	8	0.0096771	0.0212817	-0.019524	0.00574117	-0.0122995	0.00236037	4	-0.0184874	0.00420367	4
G5150_P1D03-SC_37C	G5150_P1D03	5150	P1D03	P1_SC_37C	SC_37C	CGAACAGAAACACAA	-0.0583872	0.026589	5	0.0142805	0.0293164	-0.0509589	-0.00742829	-0.0446476	0.00621966	3	-0.138655	0.0150332	2
G5150_P1D03-SC_37C	G5150_P1D03	5150	P1D03	P1_SC_37C	SC_37C	CGAATGCCATACAAA	-0.00727941	0.00440309	6	0.0240625	0.045279	-0.0187919	0.0115125	-0.014454	0.00400313	3	0.0011897	0.00434932	3
G5150_P1D03-SC_37C	G5150_P1D03	5150	P1D03	P1_SC_37C	SC_37C	CGATGATGATGATGA	-0.00429081	0.00149664	10	0.196234	0.264352	-0.00559316	0.00130236	-0.00254414	0.00192696	5	-0.00633948	0.00208691	5
G5150_P1D03-SC_37C	G5150_P1D03	5150	P1D03	P1_SC_37C	SC_37C	CGCGATCAATCCTCT	-0.00966277	0.00537068	7	0.115754	0.1697	-0.0319146	0.0222519	-0.0158772	0.00961035	3	-0.00680905	0.00651243	4
G5150_P1D03-SC_37C	G5150_P1D03	5150	P1D03	P1_SC_37C	SC_37C	CTAAGCAGTCTTCTC	-0.0885607	0.00606164	10	6.96119e-06	5.6751e-05	-0.133331	0.0447699	-0.0920158	0.0123114	5	-0.0883196	0.00325217	5
G5150_P1D03-SC_37C	G5150_P1D03	5150	P1D03	P1_SC_37C	SC_37C	CTAAGTGTGAAGGAG	-0.0782474	0.0182477	5	0.0502691	0.0840314	-0.131283	0.053036	-0.0987314	0.0473314	2	-0.0762242	0.0148751	3
G5150_P1D03-SC_37C	G5150_P1D03	5150	P1D03	P1_SC_37C	SC_37C	CTACTTACAACGGAA	0.0081973	0.00159997	10	0.0101054	0.0220857	2.16745e-05	0.00817563	0.00730553	0.00274362	5	0.00861783	0.00188408	5
G5150_P1D03-SC_37C	G5150_P1D03	5150	P1D03	P1_SC_37C	SC_37C	CTAGTTGTATAGCCA	-0.0134544	0.00530103	8	0.00237019	0.00646275	-0.0228617	0.00940729	-0.0239863	0.00518739	5	-0.00318867	0.00512139	3
G5150_P1D03-SC_37C	G5150_P1D03	5150	P1D03	P1_SC_37C	SC_37C	CTATCAAGGCTTAAT	-0.0111905	0.0120361	10	0.0238262	0.0449062	0.0109081	-0.0220986	-0.0407778	0.0198787	5	-0.00850391	0.00599016	5
G5150_P1D03-SC_37C	G5150_P1D03	5150	P1D03	P1_SC_37C	SC_37C	CTCGCTAATACTCCT	-0.0288075	0.00243593	10	7.13735e-07	9.77032e-06	-0.0375804	0.00877281	-0.025399	0.00158505	5	-0.0366348	0.00240194	5
G5150_P1D03-SC_37C	G5150_P1D03	5150	P1D03	P1_SC_37C	SC_37C	CTCTTGAGAATACTT	-0.0887411	0.00788401	9	0.000159304	0.00069581	-0.0948968	0.00615572	-0.0918974	0.0179931	4	-0.0884729	0.00524494	5
G5150_P1D03-SC_37C	G5150_P1D03	5150	P1D03	P1_SC_37C	SC_37C	CTGATTTGTGCTGTC	0.0206717	0.00765537	9	0.978713	0.983651	0.0375917	-0.0169201	-0.000258018	0.0140655	4	0.0211591	0.00214657	5
G5150_P1D03-SC_37C	G5150_P1D03	5150	P1D03	P1_SC_37C	SC_37C	CTTGATCAATCAAAA	-0.0927618	0.00518543	10	1.86429e-06	2.00202e-05	-0.0824445	-0.0103173	-0.0941272	0.0087573	5	-0.0919874	0.00659496	5
G5150_P1D03-SC_37C	G5150_P1D03	5150	P1D03	P1_SC_37C	SC_37C	CTTGCAAGTGTAATT	2.83653e-05	0.00108934	10	0.962971	0.971314	0.000560442	-0.000532077	-6.33048e-05	0.000820193	5	0.000624803	0.00209211	5
G5150_P1D03-SC_37C	G5150_P1D03	5150	P1D03	P1_SC_37C	SC_37C	GAACTCAGGTTCCAT	-0.0275608	0.00190431	10	5.38986e-06	4.64173e-05	-0.0442945	0.0167336	-0.0284591	0.00357608	5	-0.0273419	0.00176566	5
G5150_P1D03-SC_37C	G5150_P1D03	5150	P1D03	P1_SC_37C	SC_37C	GAGAATGAAGGACAG	-0.0320472	0.00249616	10	4.8129e-06	4.2551e-05	0.00446468	-0.0365118	-0.0351527	0.00334007	5	-0.0288055	0.0034125	5
G5150_P1D03-SC_37C	G5150_P1D03	5150	P1D03	P1_SC_37C	SC_37C	GAGTGCTTCAAAGTT	0.0110767	0.002219	10	0.0021832	0.0060409	0.0186933	-0.00761662	0.00786799	0.0015872	5	0.0178687	0.00230922	5
G5150_P1D03-SC_37C	G5150_P1D03	5150	P1D03	P1_SC_37C	SC_37C	GCCCTCGAAACCTAT	-0.0690077	0.0106019	9	0.00238598	0.00649664	-0.0598668	-0.00914084	-0.0770773	0.0194897	4	-0.0655917	0.0126804	5
G5150_P1D03-SC_37C	G5150_P1D03	5150	P1D03	P1_SC_37C	SC_37C	GCTGCTTATGAGGAT	-0.00382862	0.00195601	10	0.172076	0.236882	-0.0056472	0.00181858	-0.00190885	0.00103218	5	-0.0105517	0.00193158	5
G5150_P1D03-SC_37C	G5150_P1D03	5150	P1D03	P1_SC_37C	SC_37C	GGTGGAAGTAGCAGT	0.00124553	0.0123751	6	0.0325345	0.0581884	0.00243518	-0.00118965	-0.0394951	0.0199568	2	0.00489534	0.00597329	4
G5150_P1D03-SC_37C	G5150_P1D03	5150	P1D03	P1_SC_37C	SC_37C	GGTTGCCCAGAAGTA	0.0144031	0.00179508	10	0.000498373	0.00178912	-0.0194968	0.0339	0.00956071	0.00226448	5	0.0164959	0.00148866	5
G5150_P1D03-SC_37C	G5150_P1D03	5150	P1D03	P1_SC_37C	SC_37C	GTAATCTGACTCTAG	-0.0126819	0.00584188	7	0.132541	0.190214	0.0077402	-0.0204221	-0.0149778	0.0096674	4	-0.0115275	0.00685494	3
G5150_P1D03-SC_37C	G5150_P1D03	5150	P1D03	P1_SC_37C	SC_37C	GTACAAGAAATTTTG	-0.0327965	0.0153875	8	0.123386	0.179119	-0.0434344	0.0106378	-0.0326062	0.00305629	5	-0.065964	0.0403418	3
G5150_P1D03-SC_37C	G5150_P1D03	5150	P1D03	P1_SC_37C	SC_37C	GTCACCGGCACTAAC	-0.00279351	0.00488	10	0.0159365	0.0321595	-0.0259069	0.0231134	-0.0164491	0.00739121	5	-0.00147341	0.00229808	5
G5150_P1D03-SC_37C	G5150_P1D03	5150	P1D03	P1_SC_37C	SC_37C	GTGTGATTACTAAAT	-0.0236553	0.00589055	10	0.053391	0.0882904	-0.0108598	-0.0127956	-0.0196201	0.0114189	5	-0.0243168	0.00462315	5
G5150_P1D03-SC_37C	G5150_P1D03	5150	P1D03	P1_SC_37C	SC_37C	GTTAAATCAACAGTT	-0.0346299	0.00265029	10	1.83482e-06	1.98057e-05	-0.0412742	0.00664429	-0.0322281	0.00192028	5	-0.0422618	0.0034231	5
G5150_P1D03-SC_37C	G5150_P1D03	5150	P1D03	P1_SC_37C	SC_37C	GTTCAGCTTTGATCG	-0.109434	0.00319253	10	1.33428e-09	1.29368e-07	-0.124119	0.0146852	-0.100716	0.00398272	5	-0.113308	0.00265514	5
G5150_P1D03-SC_37C	G5150_P1D03	5150	P1D03	P1_SC_37C	SC_37C	GTTGAACTGGTTGTT	-0.0225288	0.00395681	10	0.000102621	0.000490352	-0.0331275	0.0105987	-0.0207845	0.00142903	5	-0.0367792	0.00408455	5
G5150_P1D03-SC_37C	G5150_P1D03	5150	P1D03	P1_SC_37C	SC_37C	GTTGGGCGCTTAAAG	-0.000690912	0.00071991	10	0.189863	0.257457	-0.00339134	0.00270043	-0.000766364	0.000937291	5	-0.000583543	0.00111809	5
G5150_P1D03-SC_37C	G5150_P1D03	5150	P1D03	P1_SC_37C	SC_37C	GTTTAGCTTCCGTTG	-0.00471394	0.00404439	10	0.0213684	0.0410427	0.000432998	-0.00514694	-0.0139298	0.00598762	5	-0.00127705	0.00365653	5
G5150_P1D03-SC_37C	G5150_P1D03	5150	P1D03	P1_SC_37C	SC_37C	GTTTGTTTTGGGAAA	-0.151311	0.00777901	10	3.87563e-07	6.0728e-06	-0.140287	-0.0110231	-0.131836	0.0103081	5	-0.160479	0.00707277	5
G5150_P1D03-SC_37C	G5150_P1D03	5150	P1D03	P1_SC_37C	SC_37C	TAACCTCGCGCTGAG	-0.0216273	0.0119176	10	0.225336	0.297227	0.0247705	-0.0463978	-0.021108	0.00345517	5	-0.043632	0.0224917	5
G5150_P1D03-SC_37C	G5150_P1D03	5150	P1D03	P1_SC_37C	SC_37C	TAGACGGACATCTTC	0.0157261	0.00247071	8	0.00188402	0.00534607	0.0214085	-0.00568241	0.0164585	0.00265761	5	0.0128588	0.00525847	3
G5150_P1D03-SC_37C	G5150_P1D03	5150	P1D03	P1_SC_37C	SC_37C	TATATTGAACTTTAC	0.00205843	0.00164099	10	0.520269	0.597216	0.0115448	-0.00948642	0.00124904	0.00124151	5	0.00569015	0.00262984	5
G5150_P1D03-SC_37C	G5150_P1D03	5150	P1D03	P1_SC_37C	SC_37C	TATGCCCTTCTTCTG	-0.00132182	0.00164043	10	0.0905317	0.138273	0.00616433	-0.00748616	-0.0038155	0.00230335	5	0.000612296	0.00202853	5
G5150_P1D03-SC_37C	G5150_P1D03	5150	P1D03	P1_SC_37C	SC_37C	TCAAAACGGAGTGTT	-0.000648161	0.00127048	10	0.80662	0.848439	-0.00120033	0.000552166	0.000338923	0.00119156	5	-0.00323757	0.00192991	5
G5150_P1D03-SC_37C	G5150_P1D03	5150	P1D03	P1_SC_37C	SC_37C	TCAAAGCATGAAAAA	-0.0914759	0.00610844	10	1.46893e-07	2.94538e-06	-0.086374	-0.00510192	-0.0828421	0.00385083	5	-0.111467	0.00585962	5
G5150_P1D03-SC_37C	G5150_P1D03	5150	P1D03	P1_SC_37C	SC_37C	TCAAATGATGAGGAT	0.00290443	0.00128812	10	0.0342857	0.0607445	0.0191963	-0.0162919	0.00407234	0.00188556	5	0.00188279	0.00176354	5
G5150_P1D03-SC_37C	G5150_P1D03	5150	P1D03	P1_SC_37C	SC_37C	TCAACAACCTATGCA	0.000481471	0.00156896	10	0.742392	0.793965	0.0238632	-0.0233818	-0.000382221	0.000765884	5	0.00562433	0.0018689	5
G5150_P1D03-SC_37C	G5150_P1D03	5150	P1D03	P1_SC_37C	SC_37C	TCATAGGTATCTCGC	-0.0025577	0.000765909	10	0.00415652	0.0103514	-0.00351693	0.000959233	-0.00262652	0.000901105	5	-0.00242018	0.00127381	5
G5150_P1D03-SC_37C	G5150_P1D03	5150	P1D03	P1_SC_37C	SC_37C	TCGAAAGCACAGTAG	-0.172957	0.0220329	6	0.00955986	0.0210886	-0.135006	-0.0379508	-0.15913	0.0453467	3	-0.174794	0.0165302	3
G5150_P1D03-SC_37C	G5150_P1D03	5150	P1D03	P1_SC_37C	SC_37C	TCGATAGAATTTACT	-0.0124857	0.0013697	10	1.24417e-05	9.05824e-05	-0.0242833	0.0117975	-0.0141368	0.00154106	5	-0.00997525	0.0019003	5
G5150_P1D03-SC_37C	G5150_P1D03	5150	P1D03	P1_SC_37C	SC_37C	TCTTGGAGGTGAATG	-0.0219746	0.00271598	10	0.000160275	0.000699315	-0.0830805	0.0611059	-0.0243891	0.00339985	5	-0.0184501	0.00410769	5
G5150_P1D03-SC_37C	G5150_P1D03	5150	P1D03	P1_SC_37C	SC_37C	TGATCATCACGGGAC	-0.0731223	0.00484201	10	7.54917e-07	1.01336e-05	-0.0208832	-0.0522391	-0.0748331	0.00263812	5	-0.0598892	0.00733712	5
G5150_P1D03-SC_37C	G5150_P1D03	5150	P1D03	P1_SC_37C	SC_37C	TGGAGTCTTTGTTGA	-0.062125	0.00313818	9	7.48388e-07	1.00639e-05	-0.063193	0.00106802	-0.052178	0.00475941	4	-0.0629606	0.00137947	5
G5150_P1D03-SC_37C	G5150_P1D03	5150	P1D03	P1_SC_37C	SC_37C	TTAATTAGAGGTATG	-0.00961086	0.00254548	10	0.0323287	0.0578786	-0.0312409	0.0216301	-0.00929904	0.00175707	5	-0.0120688	0.00493319	5
G5150_P1D03-SC_37C	G5150_P1D03	5150	P1D03	P1_SC_37C	SC_37C	TTAATTGCACTTATG	-0.0536721	0.00774232	5	0.00323978	0.00839043	-0.072662	0.01899	-0.0592853	0.00687317	4	-0.0312537	0.0137357	1
G5150_P1D03-SC_37C	G5150_P1D03	5150	P1D03	P1_SC_37C	SC_37C	TTAGTCTTTCCATCA	-0.27487	0.017745	10	1.03088e-06	1.27524e-05	-0.204752	-0.0701178	-0.227058	0.0188731	5	-0.306643	0.0153853	5
G5150_P1D03-SC_37C	G5150_P1D03	5150	P1D03	P1_SC_37C	SC_37C	TTATATTTATTTGCT	-0.00845044	0.0011819	10	0.000359875	0.00136676	-0.0146704	0.00622001	-0.00874159	0.00131499	5	-0.00774146	0.002052	5
G5150_P1D03-SC_37C	G5150_P1D03	5150	P1D03	P1_SC_37C	SC_37C	TTTAACTCACCGTAA	-0.0270864	0.00331852	10	0.000428205	0.00157582	-0.0171085	-0.00997786	-0.0261425	0.00260846	5	-0.0320903	0.00600589	5
G5150_P1D03-SC_37C	G5150_P1D03	5150	P1D03	P1_SC_37C	SC_37C	TTTATAAATCAATAG	0.00179042	0.000784722	10	0.008822	0.0196769	0.00352976	-0.00173935	0.00226881	0.00104014	5	0.00119599	0.00115945	5
G5150_P1D03-SC_37C	G5150_P1D03	5150	P1D03	P1_SC_37C	SC_37C	TTTTGCATTTAGGCG	-0.0500253	0.00341737	10	7.19125e-08	1.76666e-06	-0.0117231	-0.0383023	-0.0604072	0.00414149	5	-0.0467007	0.00234361	5
G5150_P1D03-SC_37C	G5150_P1D03	5150	P1D03	P1_SC_37C	SC_37C	CTTGATGGCTGAAAG	-0.096467	0.0176327	4	0.0119417	0.0253549						-0.096467	0.0176327	4
G5150_P1D03-SC_37C	G5150_P1D03	5150	P1D03	P1_SC_37C	SC_37C	GCAAGAAAGAAACCC	-0.0765671	0.0242417	4	0.050805	0.0847679	-0.0257965	-0.0507707				-0.0765671	0.0242417	4
G7530_P1F05-SC_37C	G7530_P1F05	7530	P1F05	P1_SC_37C	SC_37C	AAAACATTATCAAAG	0.0229321	0.0131188	6	0.0731389	0.115502	-0.000652642	0.0235847	-0.0205052	0.0121187	2	0.0355778	0.00653876	4
G7530_P1F05-SC_37C	G7530_P1F05	7530	P1F05	P1_SC_37C	SC_37C	AAAAGAAAAATGTAT	0.0347421	0.00509231	9	0.00235989	0.00644251	0.0418506	-0.00710842	0.029723	0.0064894	4	0.0411214	0.00731604	5
G7530_P1F05-SC_37C	G7530_P1F05	7530	P1F05	P1_SC_37C	SC_37C	AAAAGCGACATTTCT	-0.0348741	0.0104991	7	0.161519	0.224583	-0.0616103	0.0267361	-0.0281119	0.00806469	2	-0.0513943	0.0126052	5
G7530_P1F05-SC_37C	G7530_P1F05	7530	P1F05	P1_SC_37C	SC_37C	AATGATACCATTTTT	-0.0671808	0.0130521	10	7.74876e-05	0.000393503			-0.103389	0.018233	5	-0.0581042	0.00912874	5
G7530_P1F05-SC_37C	G7530_P1F05	7530	P1F05	P1_SC_37C	SC_37C	ACAACCTACCTGCTA	0.00137336	0.00521461	10	0.698205	0.757692	-0.00161883	0.0029922	0.00264024	0.00430545	5	-0.00486216	0.00955184	5
G7530_P1F05-SC_37C	G7530_P1F05	7530	P1F05	P1_SC_37C	SC_37C	ACAAGTTTTACAGTT	0.06224	0.00725376	9	0.00038445	0.00144293	0.021037	0.041203	0.0394863	0.00920439	4	0.0688725	0.00496945	5
G7530_P1F05-SC_37C	G7530_P1F05	7530	P1F05	P1_SC_37C	SC_37C	ACAGGGCAGCTCCCG	-0.0273634	0.0105175	6	0.147271	0.208023	-0.0292694	0.00190597	-0.028217	0.00722387	3	-0.019739	0.0215899	3
G7530_P1F05-SC_37C	G7530_P1F05	7530	P1F05	P1_SC_37C	SC_37C	ACAGTTGACGGACAG	-0.00245901	0.00550791	10	0.0761041	0.119563	0.00149213	-0.00395114	-0.0124173	0.00763818	5	0.00428869	0.00628746	5
G7530_P1F05-SC_37C	G7530_P1F05	7530	P1F05	P1_SC_37C	SC_37C	ACCACCGGTCCTGCC	-0.0257525	0.0117472	9	0.193662	0.261532	-0.00133408	-0.0244184	-0.0263077	0.00690493	4	-0.0203781	0.0214836	5
G7530_P1F05-SC_37C	G7530_P1F05	7530	P1F05	P1_SC_37C	SC_37C	AGAACATCATCTACA	-0.0822185	0.0122607	6	0.0123258	0.0259932			-0.0823013	0.00636511	3	-0.0807794	0.0265465	3
G7530_P1F05-SC_37C	G7530_P1F05	7530	P1F05	P1_SC_37C	SC_37C	AGAAGACGACGATGA	-0.119675	0.0162022	10	0.000165011	0.000717469	-0.0269064	-0.0927689	-0.112029	0.00906947	5	-0.167376	0.0226522	5
G7530_P1F05-SC_37C	G7530_P1F05	7530	P1F05	P1_SC_37C	SC_37C	AGATTCATCCCATGG	0.00882088	0.0109175	10	0.142086	0.201866	-0.00105522	0.0098761	-0.0176016	0.0120704	5	0.0290384	0.0105584	5
G7530_P1F05-SC_37C	G7530_P1F05	7530	P1F05	P1_SC_37C	SC_37C	AGTGTATGATAATAT	-0.0265438	0.00413385	10	0.000705381	0.00238581	-0.01028	-0.0162638	-0.0262142	0.00261575	5	-0.0296793	0.00806869	5
G7530_P1F05-SC_37C	G7530_P1F05	7530	P1F05	P1_SC_37C	SC_37C	AGTGTTAATCAGACC	-0.00810511	0.0135959	6	0.0501773	0.0839006	-0.0454435	0.0373384	-0.0385026	0.0175934	3	0.00167238	0.009978	3
G7530_P1F05-SC_37C	G7530_P1F05	7530	P1F05	P1_SC_37C	SC_37C	AGTTTATAAAAAATT	0.0305012	0.0111579	9	0.0515311	0.0857956	0.0647237	-0.0342225	0.0381171	0.0128433	4	0.0169901	0.0171065	5
G7530_P1F05-SC_37C	G7530_P1F05	7530	P1F05	P1_SC_37C	SC_37C	ATAATTTTCATCCAC	-0.0325329	0.0316645	6	0.0340032	0.0603388	-0.0111715	-0.0213615	-0.0408532	0.00355559	2	0.0517806	0.0113186	4
G7530_P1F05-SC_37C	G7530_P1F05	7530	P1F05	P1_SC_37C	SC_37C	ATAGAGCGGCGTTGA	-0.0184372	0.0295422	8	0.0271046	0.0500062	-0.011058	-0.00737916	-0.0943717	0.0442424	4	-0.0116618	0.0132155	4
G7530_P1F05-SC_37C	G7530_P1F05	7530	P1F05	P1_SC_37C	SC_37C	ATAGTCGATTAAGAT	0.00991019	0.0129978	4	0.483544	0.561225	-0.0514128	0.061323	0.0245877	0.0289171	1	0.00472658	0.0171848	3
G7530_P1F05-SC_37C	G7530_P1F05	7530	P1F05	P1_SC_37C	SC_37C	ATATTGAGTAAGTAC	0.0181913	0.00636828	8	0.155085	0.21736	0.00108997	0.0171013	0.0168453	0.00922302	3	0.0196304	0.00953703	5
G7530_P1F05-SC_37C	G7530_P1F05	7530	P1F05	P1_SC_37C	SC_37C	ATCGTTGGCATTTGG	-0.123761	0.0396359	3	0.243807	0.317655	-0.105906	-0.0178556	-0.0483588	0.0196147	1	-0.164543	0.0144252	2
G7530_P1F05-SC_37C	G7530_P1F05	7530	P1F05	P1_SC_37C	SC_37C	ATGGCGATGGTCTTG	-0.027644	0.0187982	8	0.555955	0.630397	-0.00278687	-0.0248572	-0.0180171	0.0153059	3	-0.0564637	0.0264825	5
G7530_P1F05-SC_37C	G7530_P1F05	7530	P1F05	P1_SC_37C	SC_37C	ATTATCAAGTGCCAG	-0.039217	0.0128464	9	0.0040876	0.0102145	-0.0673298	0.0281128	-0.0602089	0.0126715	4	-0.0112118	0.014636	5
G7530_P1F05-SC_37C	G7530_P1F05	7530	P1F05	P1_SC_37C	SC_37C	ATTATCATCGCCATC	-0.0125565	0.0138524	7	0.402857	0.482862	-0.0768754	0.0643189	0.0166511	0.0235933	3	-0.0208395	0.0125642	4
G7530_P1F05-SC_37C	G7530_P1F05	7530	P1F05	P1_SC_37C	SC_37C	CAAGGATCCCCGTAG	-0.00574407	0.0151569	6	0.609359	0.679326	-0.0256483	0.0199042	-0.0221267	0.0400359	1	-0.00229098	0.0183807	5
G7530_P1F05-SC_37C	G7530_P1F05	7530	P1F05	P1_SC_37C	SC_37C	CAAGTTCGGCGAAAT	0.00257661	0.00972183	7	0.886199	0.912044	-0.00314285	0.00571945	0.00145407	0.00250123	3	0.0266834	0.011591	4
G7530_P1F05-SC_37C	G7530_P1F05	7530	P1F05	P1_SC_37C	SC_37C	CAATCTTGAATTGAT	0.0217323	0.00533198	9	0.0432502	0.0739502	0.0141933	0.00753905	0.0183623	0.00864141	4	0.024188	0.0073766	5
G7530_P1F05-SC_37C	G7530_P1F05	7530	P1F05	P1_SC_37C	SC_37C	CAATTTCAACGTTGT	-0.00692009	0.00967005	6	0.965976	0.973006	-0.0641989	0.0572788	-0.000810215	0.0241527	2	-0.00832793	0.0115938	4
G7530_P1F05-SC_37C	G7530_P1F05	7530	P1F05	P1_SC_37C	SC_37C	CATATGCATTCCTTG	-0.0411089	0.0266187	8	0.593013	0.663896	-0.00930645	-0.0318025	-0.0253449	0.0332553	3	-0.0625436	0.0387782	5
G7530_P1F05-SC_37C	G7530_P1F05	7530	P1F05	P1_SC_37C	SC_37C	CATCAATGAGGCAGT	-0.0674757	0.0518306	3	0.258828	0.333805	-0.170366	0.10289	-0.111203	0.0479333	2	0.0201304	0.0678464	1
G7530_P1F05-SC_37C	G7530_P1F05	7530	P1F05	P1_SC_37C	SC_37C	CATTGTCGGACGCTT	0.136386	0.00929432	6	1.16236e-06	1.3975e-05	0.0853687	0.0510175	0.130737	0.00257266	3	0.163664	0.00565296	3
G7530_P1F05-SC_37C	G7530_P1F05	7530	P1F05	P1_SC_37C	SC_37C	CATTTATGGCTATCT	0.0324987	0.00897241	4	0.414251	0.494237	-0.0900852	0.122584	0.0140949	0.0139777	1	0.0401954	0.00903928	3
G7530_P1F05-SC_37C	G7530_P1F05	7530	P1F05	P1_SC_37C	SC_37C	CCAACACAGGCTTCG	0.0304957	0.0064725	9	0.0177102	0.0351453	0.00488293	0.0256128	0.0200133	0.00729689	5	0.0425123	0.00781261	4
G7530_P1F05-SC_37C	G7530_P1F05	7530	P1F05	P1_SC_37C	SC_37C	CCAAGACCGTGTAAA	-0.166529	0.0299986	4	0.0626151	0.101062	-0.232802	0.0662737	-0.111052	0.0346721	2	-0.190708	0.0228901	2
G7530_P1F05-SC_37C	G7530_P1F05	7530	P1F05	P1_SC_37C	SC_37C	CCAGGATGTACCGCC	-0.160546	0.0145934	7	0.000796841	0.00263017	-0.104767	-0.0557793	-0.170581	0.0318239	3	-0.158435	0.0145963	4
G7530_P1F05-SC_37C	G7530_P1F05	7530	P1F05	P1_SC_37C	SC_37C	CCGTTAGTATCGCTA	-0.0444451	0.00624143	5	0.0774247	0.121272	-0.019524	-0.0249211	-0.0331385	0.0127414	1	-0.0484568	0.00758959	4
G7530_P1F05-SC_37C	G7530_P1F05	7530	P1F05	P1_SC_37C	SC_37C	CGAACAGAAACACAA	-0.0767256	0.0354353	4	0.0355356	0.0626297	-0.0509589	-0.0257667	-0.15255	0.0415631	2	-0.0748608	0.00651805	2
G7530_P1F05-SC_37C	G7530_P1F05	7530	P1F05	P1_SC_37C	SC_37C	CGAATGCCATACAAA	-0.00609469	0.0120557	5	0.0640118	0.102943	-0.0187919	0.0126973	0.0239487	0.0106416	2	-0.0198615	0.0072036	3
G7530_P1F05-SC_37C	G7530_P1F05	7530	P1F05	P1_SC_37C	SC_37C	CGATGATGATGATGA	-0.00854835	0.00641668	9	0.316232	0.394324	-0.00559316	-0.00295518	-0.00914395	0.00596943	5	-0.00559117	0.0133013	4
G7530_P1F05-SC_37C	G7530_P1F05	7530	P1F05	P1_SC_37C	SC_37C	CTAAGCAGTCTTCTC	-0.163732	0.0185199	8	0.00178311	0.00510245	-0.133331	-0.0304012	-0.171343	0.0334215	3	-0.159535	0.0248169	5
G7530_P1F05-SC_37C	G7530_P1F05	7530	P1F05	P1_SC_37C	SC_37C	CTAAGTGTGAAGGAG	0.0293869	0.0295861	4	0.592506	0.663626	-0.131283	0.16067	0.0299648	0.00981728	2	0.00278518	0.0666074	2
G7530_P1F05-SC_37C	G7530_P1F05	7530	P1F05	P1_SC_37C	SC_37C	CTACTTACAACGGAA	0.00514511	0.00742527	8	0.733395	0.786899	2.16745e-05	0.00512344	0.00441924	0.0109831	3	0.00587734	0.0110311	5
G7530_P1F05-SC_37C	G7530_P1F05	7530	P1F05	P1_SC_37C	SC_37C	CTATCAAGGCTTAAT	0.019197	0.00738959	9	0.548235	0.623296	0.0109081	0.00828884	0.00577875	0.010324	4	0.0286376	0.00865966	5
G7530_P1F05-SC_37C	G7530_P1F05	7530	P1F05	P1_SC_37C	SC_37C	CTCGCTAATACTCCT	-0.0366735	0.00932303	10	0.000206333	0.000862225	-0.0375804	0.000906832	-0.0484287	0.00626623	5	-0.00724247	0.00991503	5
G7530_P1F05-SC_37C	G7530_P1F05	7530	P1F05	P1_SC_37C	SC_37C	CTCTTGAGAATACTT	-0.067997	0.0231465	5	0.248915	0.323296	-0.0948968	0.0268998	-0.0590486	0.0387077	2	-0.0753635	0.0351201	3
G7530_P1F05-SC_37C	G7530_P1F05	7530	P1F05	P1_SC_37C	SC_37C	CTGATTTGTGCTGTC	-0.00783302	0.0282591	5	0.906671	0.927814	0.0375917	-0.0454248	-0.00632165	0.0138692	2	-0.0268274	0.0491675	3
G7530_P1F05-SC_37C	G7530_P1F05	7530	P1F05	P1_SC_37C	SC_37C	CTTGATCAATCAAAA	-0.220421	0.0329745	8	0.0133406	0.0276965	-0.0824445	-0.137976	-0.195649	0.0541916	3	-0.237322	0.0447629	5
G7530_P1F05-SC_37C	G7530_P1F05	7530	P1F05	P1_SC_37C	SC_37C	CTTGCAAGTGTAATT	0.0068818	0.012042	8	0.574248	0.646549	0.000560442	0.00632136	0.011183	0.00905349	3	-0.00961364	0.0177298	5
G7530_P1F05-SC_37C	G7530_P1F05	7530	P1F05	P1_SC_37C	SC_37C	GAACTCAGGTTCCAT	0.0225356	0.0245289	5	0.627232	0.695702	-0.0442945	0.0668301	-0.0200405	0.0630118	2	0.0233748	0.00884661	3
G7530_P1F05-SC_37C	G7530_P1F05	7530	P1F05	P1_SC_37C	SC_37C	GAGAATGAAGGACAG	0.00188458	0.0073341	10	0.00321331	0.00833921	0.00446468	-0.00258009	-0.0130616	0.00409357	5	0.0255833	0.00515465	5
G7530_P1F05-SC_37C	G7530_P1F05	7530	P1F05	P1_SC_37C	SC_37C	GAGTGCTTCAAAGTT	0.0459235	0.00547734	10	0.000399525	0.00148652	0.0186933	0.0272301	0.0355923	0.00803736	5	0.0513458	0.00582277	5
G7530_P1F05-SC_37C	G7530_P1F05	7530	P1F05	P1_SC_37C	SC_37C	GCCCTCGAAACCTAT	0.000211943	0.0187586	8	0.50589	0.583148	-0.0598668	0.0600788	-0.0222677	0.0475104	3	0.00254886	0.0153185	5
G7530_P1F05-SC_37C	G7530_P1F05	7530	P1F05	P1_SC_37C	SC_37C	GCTGCTTATGAGGAT	-0.00243805	0.0105868	9	0.76497	0.813074	-0.0056472	0.00320915	0.00382403	0.00706247	4	-0.0279715	0.0142611	5
G7530_P1F05-SC_37C	G7530_P1F05	7530	P1F05	P1_SC_37C	SC_37C	GGTGGAAGTAGCAGT	0.000548294	0.0108327	3	0.0321325	0.0575848	0.00243518	-0.00188688	0.00742287	0.00230927	2	-0.0234236	0.00431225	1
G7530_P1F05-SC_37C	G7530_P1F05	7530	P1F05	P1_SC_37C	SC_37C	GGTTGCCCAGAAGTA	-0.0285139	0.0133454	7	0.229291	0.301581	-0.0194968	-0.00901712	-0.0295328	0.00850914	3	-0.0205437	0.0237995	4
G7530_P1F05-SC_37C	G7530_P1F05	7530	P1F05	P1_SC_37C	SC_37C	GTAATCTGACTCTAG	0.0555429	0.0102987	10	0.00230609	0.00632753	0.0077402	0.0478027	0.0271116	0.00719433	5	0.0818545	0.00692094	5
G7530_P1F05-SC_37C	G7530_P1F05	7530	P1F05	P1_SC_37C	SC_37C	GTCACCGGCACTAAC	0.0170466	0.0229233	3	0.711993	0.769369	-0.0259069	0.0429535	-0.0175095	0.0360984	1	0.0347415	0.0258315	2
G7530_P1F05-SC_37C	G7530_P1F05	7530	P1F05	P1_SC_37C	SC_37C	GTGTGATTACTAAAT	0.0119383	0.00531686	10	0.137689	0.196426	-0.0108598	0.022798	0.0117287	0.00570782	5	0.0125307	0.00959501	5
G7530_P1F05-SC_37C	G7530_P1F05	7530	P1F05	P1_SC_37C	SC_37C	GTTAAATCAACAGTT	-0.060591	0.00780533	10	0.000625287	0.00215767	-0.0412742	-0.0193168	-0.0599999	0.00598612	5	-0.0644195	0.0152349	5
G7530_P1F05-SC_37C	G7530_P1F05	7530	P1F05	P1_SC_37C	SC_37C	GTTCAGCTTTGATCG	-0.178711	0.0189795	10	1.16968e-05	8.60646e-05	-0.124119	-0.0545924	-0.215298	0.0235513	5	-0.147095	0.0218932	5
G7530_P1F05-SC_37C	G7530_P1F05	7530	P1F05	P1_SC_37C	SC_37C	GTTGAACTGGTTGTT	0.078139	0.0137917	7	3.24046e-05	0.000193511	-0.0331275	0.111266	0.0539776	0.00435202	3	0.116136	0.00545761	4
G7530_P1F05-SC_37C	G7530_P1F05	7530	P1F05	P1_SC_37C	SC_37C	GTTGGGCGCTTAAAG	0.000998571	0.00616559	10	0.927108	0.944451	-0.00339134	0.00438991	-0.000681025	0.00386065	5	0.0136963	0.010615	5
G7530_P1F05-SC_37C	G7530_P1F05	7530	P1F05	P1_SC_37C	SC_37C	GTTTAGCTTCCGTTG	0.0243313	0.0096592	10	0.0427357	0.073211	0.000432998	0.0238983	0.0166047	0.0047062	5	0.0580204	0.00982702	5
G7530_P1F05-SC_37C	G7530_P1F05	7530	P1F05	P1_SC_37C	SC_37C	GTTTGTTTTGGGAAA	-0.143248	0.0209512	5	0.0297148	0.053951	-0.140287	-0.0029603	-0.143114	0.00354368	2	-0.157703	0.0368145	3
G7530_P1F05-SC_37C	G7530_P1F05	7530	P1F05	P1_SC_37C	SC_37C	TAACCTCGCGCTGAG	0.033561	0.0158365	10	0.12228	0.177917	0.0247705	0.00879057	-0.0217756	0.0171551	5	0.0423728	0.00684571	5
G7530_P1F05-SC_37C	G7530_P1F05	7530	P1F05	P1_SC_37C	SC_37C	TAGACGGACATCTTC	0.0345519	0.00590624	8	0.000505041	0.0018094	0.0214085	0.0131434	0.0427117	0.00759736	5	0.0286285	0.00647311	3
G7530_P1F05-SC_37C	G7530_P1F05	7530	P1F05	P1_SC_37C	SC_37C	TATATTGAACTTTAC	-0.00018248	0.00725959	9	0.907213	0.92815	0.0115448	-0.0117273	0.00129607	0.00651852	4	-0.00564501	0.0125293	5
G7530_P1F05-SC_37C	G7530_P1F05	7530	P1F05	P1_SC_37C	SC_37C	TATGCCCTTCTTCTG	0.0378053	0.00819429	8	0.0302575	0.0547845	0.00616433	0.0316409	0.0307037	0.00719588	3	0.0530073	0.0105283	5
G7530_P1F05-SC_37C	G7530_P1F05	7530	P1F05	P1_SC_37C	SC_37C	TCAAAACGGAGTGTT	0.00265464	0.00496743	10	0.161998	0.225124	-0.00120033	0.00385497	0.00832317	0.0056962	5	-0.00598269	0.00703137	5
G7530_P1F05-SC_37C	G7530_P1F05	7530	P1F05	P1_SC_37C	SC_37C	TCAAAGCATGAAAAA	-0.0979635	0.00860316	10	3.51686e-05	0.000206454	-0.086374	-0.0115895	-0.10005	0.0086655	5	-0.0912114	0.0155891	5
G7530_P1F05-SC_37C	G7530_P1F05	7530	P1F05	P1_SC_37C	SC_37C	TCAAATGATGAGGAT	0.0164739	0.00870747	10	0.267191	0.342745	0.0191963	-0.00272247	0.00629767	0.00444982	5	0.0470391	0.00771195	5
G7530_P1F05-SC_37C	G7530_P1F05	7530	P1F05	P1_SC_37C	SC_37C	TCAACAACCTATGCA	0.0268432	0.00494454	8	0.0294857	0.0535896	0.0238632	0.00297993	0.0199496	0.0106798	3	0.0286563	0.00547707	5
G7530_P1F05-SC_37C	G7530_P1F05	7530	P1F05	P1_SC_37C	SC_37C	TCATAGGTATCTCGC	-0.00555353	0.00439956	10	0.28956	0.366697	-0.00351693	-0.00203659	-0.00622236	0.00475293	5	-0.00374414	0.00781752	5
G7530_P1F05-SC_37C	G7530_P1F05	7530	P1F05	P1_SC_37C	SC_37C	TCGAAAGCACAGTAG	-0.163252	0.0264037	4	0.155306	0.217587	-0.135006	-0.0282458	-0.120063	0.0538442	1	-0.177896	0.0313525	3
G7530_P1F05-SC_37C	G7530_P1F05	7530	P1F05	P1_SC_37C	SC_37C	TCTTGGAGGTGAATG	-0.180309	0.0229379	9	0.000297154	0.00116514	-0.0830805	-0.097228	-0.217307	0.0368808	4	-0.160961	0.0266702	5
G7530_P1F05-SC_37C	G7530_P1F05	7530	P1F05	P1_SC_37C	SC_37C	TGATCATCACGGGAC	0.0304968	0.0107658	10	0.708357	0.766172	-0.0208832	0.05138	0.00477699	0.0152826	5	0.0408037	0.00967447	5
G7530_P1F05-SC_37C	G7530_P1F05	7530	P1F05	P1_SC_37C	SC_37C	TGGAGTCTTTGTTGA	-0.0177461	0.0032578	9	0.00123853	0.00379822	-0.063193	0.0454469	-0.0181539	0.00322073	4	-0.0164801	0.00567449	5
G7530_P1F05-SC_37C	G7530_P1F05	7530	P1F05	P1_SC_37C	SC_37C	TTAATTAGAGGTATG	-0.031572	0.0194248	9	0.501275	0.578826	-0.0312409	-0.000331039	-0.0217536	0.0441227	4	-0.0324367	0.013094	5
G7530_P1F05-SC_37C	G7530_P1F05	7530	P1F05	P1_SC_37C	SC_37C	TTAATTGCACTTATG	0.0378488	0.0163701	3	0.110223	0.162895	-0.072662	0.110511	0.0665241	0.0118553	1	0.0203043	0.00927322	2
G7530_P1F05-SC_37C	G7530_P1F05	7530	P1F05	P1_SC_37C	SC_37C	TTAGTCTTTCCATCA	-0.119043	0.0142546	9	0.00149293	0.00440884	-0.204752	0.0857087	-0.0962212	0.0190646	4	-0.13871	0.0176975	5
G7530_P1F05-SC_37C	G7530_P1F05	7530	P1F05	P1_SC_37C	SC_37C	TTATATTTATTTGCT	-0.0123669	0.00908422	10	0.705749	0.763949	-0.0146704	0.00230358	-0.00489181	0.0124598	5	-0.0210692	0.0134438	5
G7530_P1F05-SC_37C	G7530_P1F05	7530	P1F05	P1_SC_37C	SC_37C	TTTAACTCACCGTAA	-0.0172183	0.0179871	10	0.591621	0.662753	-0.0171085	-0.000109819	-0.0144532	0.0131657	5	-0.0361754	0.0344724	5
G7530_P1F05-SC_37C	G7530_P1F05	7530	P1F05	P1_SC_37C	SC_37C	TTTATAAATCAATAG	0.00169303	0.00394325	10	0.538939	0.614458	0.00352976	-0.00183674	-0.00154337	0.00283156	5	0.0126134	0.00520131	5
G7530_P1F05-SC_37C	G7530_P1F05	7530	P1F05	P1_SC_37C	SC_37C	TTTTGCATTTAGGCG	-0.0179053	0.00617129	9	0.00845208	0.0189776	-0.0117231	-0.00618227	-0.0288107	0.0106313	4	-0.0138489	0.00648395	5
G7530_P1F05-SC_37C	G7530_P1F05	7530	P1F05	P1_SC_37C	SC_37C	CTAGTTGTATAGCCA	-0.00949912	0.05118	3	0.869426	0.898914	-0.0228617	0.0133625				-0.00949912	0.05118	3
G7530_P1F05-SC_37C	G7530_P1F05	7530	P1F05	P1_SC_37C	SC_37C	GTACAAGAAATTTTG	-0.0709457	0.0544794	3	0.321479	0.399747	-0.0434344	-0.0275114				-0.0709457	0.0544794	3
G7530_P1F05-SC_37C	G7530_P1F05	7530	P1F05	P1_SC_37C	SC_37C	TAATATTGTTTTGCG	-0.0890843	0.0289639	4	0.0528884	0.0876222	-0.0703753	-0.018709				-0.0890843	0.0289639	4
G7530_P3D03-SC_37C	G7530_P3D03	7530	P3D03	P3_SC_37C	SC_37C	AAAACATTATCAAAG	-0.00129236	0.0023865	10	0.155407	0.217665	-0.00194739	0.000655028	-0.00496179	0.00421593	5	-0.000446073	0.00202466	5
G7530_P3D03-SC_37C	G7530_P3D03	7530	P3D03	P3_SC_37C	SC_37C	AAAAGAAAAATGTAT	-0.00142539	0.0016613	10	0.000169758	0.000734263	0.0167521	-0.0181775	-0.00657802	0.00159615	5	0.00120141	0.00113966	5
G7530_P3D03-SC_37C	G7530_P3D03	7530	P3D03	P3_SC_37C	SC_37C	AAAAGCGACATTTCT	-0.00827108	0.00352137	10	0.000853372	0.00278863	-0.0396226	0.0313515	-0.0186173	0.00481991	5	-0.0062385	0.00213635	5
G7530_P3D03-SC_37C	G7530_P3D03	7530	P3D03	P3_SC_37C	SC_37C	ACAACCTACCTGCTA	0.00128838	0.00130641	10	0.126436	0.182779	-0.00239255	0.00368093	0.00267233	0.002005	5	0.000342654	0.00165742	5
G7530_P3D03-SC_37C	G7530_P3D03	7530	P3D03	P3_SC_37C	SC_37C	ACAAGTTTTACAGTT	-0.0445336	0.0020936	10	5.19718e-09	2.96979e-07	-0.0260819	-0.0184517	-0.0497738	0.00232201	5	-0.0408241	0.00195364	5
G7530_P3D03-SC_37C	G7530_P3D03	7530	P3D03	P3_SC_37C	SC_37C	ACAGGGCAGCTCCCG	-0.0317044	0.0046991	9	0.000396509	0.00147884	-0.0397814	0.00807703	-0.0391573	0.00592929	4	-0.0244976	0.00583055	5
G7530_P3D03-SC_37C	G7530_P3D03	7530	P3D03	P3_SC_37C	SC_37C	ACAGTTGACGGACAG	-0.00095904	0.0010785	10	0.384874	0.464887	-0.00517114	0.0042121	-0.00115208	0.00150142	5	-0.000723875	0.00165716	5
G7530_P3D03-SC_37C	G7530_P3D03	7530	P3D03	P3_SC_37C	SC_37C	ACCACCGGTCCTGCC	-0.0113588	0.00302277	10	0.249085	0.323457	-0.000431459	-0.0109273	-0.00462086	0.00525131	5	-0.0118292	0.00138747	5
G7530_P3D03-SC_37C	G7530_P3D03	7530	P3D03	P3_SC_37C	SC_37C	AGAACATCATCTACA	-0.203022	0.0321701	8	0.0049118	0.0119232	-0.223556	0.0205341	-0.204439	0.00687105	3	-0.143262	0.0446114	5
G7530_P3D03-SC_37C	G7530_P3D03	7530	P3D03	P3_SC_37C	SC_37C	AGAAGACGACGATGA	-0.0639643	0.00872343	10	9.51334e-07	1.20803e-05	-0.0663318	0.00236747	-0.0948929	0.0100585	5	-0.0634034	0.00135458	5
G7530_P3D03-SC_37C	G7530_P3D03	7530	P3D03	P3_SC_37C	SC_37C	AGATTCATCCCATGG	-0.000127512	0.00280182	7	0.900843	0.923758	0.0346566	-0.0347841	-0.000610927	0.00113354	2	0.0041763	0.00338225	5
G7530_P3D03-SC_37C	G7530_P3D03	7530	P3D03	P3_SC_37C	SC_37C	AGTGTATGATAATAT	-0.0230948	0.00156692	10	3.62471e-09	2.35172e-07	-0.0233157	0.000220885	-0.0276922	0.00159175	5	-0.0205508	0.00118408	5
G7530_P3D03-SC_37C	G7530_P3D03	7530	P3D03	P3_SC_37C	SC_37C	AGTGTTAATCAGACC	-0.00377048	0.0150664	9	0.0991535	0.149191	-0.0221393	0.0183688	-0.0384927	0.0309028	4	-0.00367033	0.00165971	5
G7530_P3D03-SC_37C	G7530_P3D03	7530	P3D03	P3_SC_37C	SC_37C	AGTTTATAAAAAATT	-0.0217911	0.00530939	10	4.29682e-07	6.57561e-06	0.0188846	-0.0406757	-0.0375967	0.00279698	5	-0.00773302	0.00263783	5
G7530_P3D03-SC_37C	G7530_P3D03	7530	P3D03	P3_SC_37C	SC_37C	ATAATTTTCATCCAC	-0.0621613	0.0545249	5	0.20844	0.278508	-0.104223	0.042062	-0.0599601	0.00486512	2	-0.19253	0.0374418	3
G7530_P3D03-SC_37C	G7530_P3D03	7530	P3D03	P3_SC_37C	SC_37C	ATAGAGCGGCGTTGA	-0.0326643	0.00301362	10	4.05947e-05	0.0002325	-0.0178801	-0.0147842	-0.0348724	0.00505817	5	-0.031498	0.00367613	5
G7530_P3D03-SC_37C	G7530_P3D03	7530	P3D03	P3_SC_37C	SC_37C	ATAGTCGATTAAGAT	-0.103619	0.0470926	3	0.628217	0.696457	-0.0361705	-0.0674483	-0.0717229	0.10853	1	-0.119567	0.076742	2
G7530_P3D03-SC_37C	G7530_P3D03	7530	P3D03	P3_SC_37C	SC_37C	ATATTGAGTAAGTAC	-0.0129742	0.00249617	10	0.00372043	0.00943228	-0.0106469	-0.00232731	-0.0143455	0.00385025	5	-0.0118444	0.00349493	5
G7530_P3D03-SC_37C	G7530_P3D03	7530	P3D03	P3_SC_37C	SC_37C	ATCGTTGGCATTTGG	-0.0845959	0.0230835	6	4.85656e-05	0.000266512	-0.0437201	-0.0408758	-0.0595631	0.00338744	5	-0.197	0.00717806	1
G7530_P3D03-SC_37C	G7530_P3D03	7530	P3D03	P3_SC_37C	SC_37C	ATGAAGTTCATAATG	-0.013006	0.0296434	4	0.819165	0.859168	0.0100138	-0.0230198	-0.00964671	0.0131617	2	-0.0630627	0.0508065	2
G7530_P3D03-SC_37C	G7530_P3D03	7530	P3D03	P3_SC_37C	SC_37C	ATGGCGATGGTCTTG	-0.00506971	0.00358139	10	0.694064	0.754052	-0.007843	0.00277328	-0.00206153	0.00513647	5	-0.00809895	0.00515442	5
G7530_P3D03-SC_37C	G7530_P3D03	7530	P3D03	P3_SC_37C	SC_37C	ATTAATACTTTGCAG	-0.21832	0.0140826	3	0.0870559	0.1339	-0.105046	-0.113274	-0.229555	0.0316085	1	-0.212702	0.022349	2
G7530_P3D03-SC_37C	G7530_P3D03	7530	P3D03	P3_SC_37C	SC_37C	ATTATCAAGTGCCAG	-0.119677	0.009296	10	2.90344e-05	0.000176862	-0.104003	-0.015674	-0.117508	0.0169507	5	-0.120432	0.0100008	5
G7530_P3D03-SC_37C	G7530_P3D03	7530	P3D03	P3_SC_37C	SC_37C	ATTATCATCGCCATC	-0.163929	0.031774	6	0.446791	0.526538	-0.127728	-0.036201	-0.0520339	0.0617503	1	-0.186317	0.0276213	5
G7530_P3D03-SC_37C	G7530_P3D03	7530	P3D03	P3_SC_37C	SC_37C	CAAGGATCCCCGTAG	-0.0164804	0.00349222	6	0.357872	0.436803	-0.0174624	0.000981979	-0.00865423	0.00841365	1	-0.0180807	0.00380459	5
G7530_P3D03-SC_37C	G7530_P3D03	7530	P3D03	P3_SC_37C	SC_37C	CAAGTTCGGCGAAAT	-0.00643409	0.00236562	10	0.0377685	0.0658755	-0.00943237	0.00299828	-0.00818046	0.00347089	5	-0.00477121	0.00338691	5
G7530_P3D03-SC_37C	G7530_P3D03	7530	P3D03	P3_SC_37C	SC_37C	CAATCTTGAATTGAT	-0.0111947	0.0019005	10	0.00415138	0.0103407	-0.000313742	-0.010881	-0.0102983	0.00245016	5	-0.0125912	0.00305797	5
G7530_P3D03-SC_37C	G7530_P3D03	7530	P3D03	P3_SC_37C	SC_37C	CAATTTCAACGTTGT	-0.10936	0.00867689	8	0.000310229	0.0012054	-0.0701227	-0.0392372	-0.111927	0.011003	3	-0.105756	0.0130355	5
G7530_P3D03-SC_37C	G7530_P3D03	7530	P3D03	P3_SC_37C	SC_37C	CATATGCATTCCTTG	-0.0251162	0.0066459	10	0.00381985	0.00964408	-0.00684678	-0.0182694	-0.0361651	0.0108455	5	-0.0208161	0.00676601	5
G7530_P3D03-SC_37C	G7530_P3D03	7530	P3D03	P3_SC_37C	SC_37C	CATCAATGAGGCAGT	-0.199804	0.0183471	7	0.000589967	0.00205688	-0.195177	-0.0046268	-0.203256	0.0244228	4	-0.193242	0.0336721	3
G7530_P3D03-SC_37C	G7530_P3D03	7530	P3D03	P3_SC_37C	SC_37C	CATTGTCGGACGCTT	-0.044945	0.0103203	7	0.0195246	0.038008			-0.0646311	0.0276262	2	-0.0421994	0.0103171	5
G7530_P3D03-SC_37C	G7530_P3D03	7530	P3D03	P3_SC_37C	SC_37C	CATTTATGGCTATCT	-0.28864	0.0297654	8	2.10682e-06	2.211e-05	-0.0957317	-0.192908	-0.340848	0.013306	3	-0.205313	0.0168102	5
G7530_P3D03-SC_37C	G7530_P3D03	7530	P3D03	P3_SC_37C	SC_37C	CCAACACAGGCTTCG	-0.0306973	0.00448422	10	9.70415e-06	7.40714e-05	-0.0257215	-0.00497585	-0.0285593	0.00145649	5	-0.0474742	0.00407998	5
G7530_P3D03-SC_37C	G7530_P3D03	7530	P3D03	P3_SC_37C	SC_37C	CCAAGACCGTGTAAA	-0.142157	0.0116565	8	0.000195379	0.00082391	-0.233836	0.091679	-0.143199	0.0212871	4	-0.141743	0.0134252	4
G7530_P3D03-SC_37C	G7530_P3D03	7530	P3D03	P3_SC_37C	SC_37C	CCAGGATGTACCGCC	-0.059463	0.00293234	8	7.80033e-07	1.03702e-05	-0.0966343	0.0371714	-0.068747	0.00532591	3	-0.0587489	0.00147707	5
G7530_P3D03-SC_37C	G7530_P3D03	7530	P3D03	P3_SC_37C	SC_37C	CCGTTAGTATCGCTA	-0.00306731	0.0024867	7	0.651529	0.71735	-0.00985291	0.0067856	-0.00232077	0.00287439	2	-0.00411249	0.00340109	5
G7530_P3D03-SC_37C	G7530_P3D03	7530	P3D03	P3_SC_37C	SC_37C	CGAACAGAAACACAA	-0.0403056	0.0125455	7	0.124034	0.179913	-0.0491679	0.00886228	-0.0347262	0.0110976	3	-0.0575898	0.0195327	4
G7530_P3D03-SC_37C	G7530_P3D03	7530	P3D03	P3_SC_37C	SC_37C	CGAATGCCATACAAA	-0.000568913	0.00252592	8	0.506	0.583148	-0.0134127	0.0128438	0.00282353	0.00461798	3	-0.00198634	0.00298501	5
G7530_P3D03-SC_37C	G7530_P3D03	7530	P3D03	P3_SC_37C	SC_37C	CGATGATGATGATGA	-0.000618867	0.00243006	10	0.00485399	0.011819	-0.00514166	0.0045228	-0.00835185	0.00319392	5	0.000179053	0.00102596	5
G7530_P3D03-SC_37C	G7530_P3D03	7530	P3D03	P3_SC_37C	SC_37C	CGCGATCAATCCTCT	-0.0213499	0.00397946	8	0.000206909	0.000864343	-0.0589946	0.0376447	-0.0338283	0.00534565	3	-0.0176047	0.0029286	5
G7530_P3D03-SC_37C	G7530_P3D03	7530	P3D03	P3_SC_37C	SC_37C	CTAAGCAGTCTTCTC	-0.0822506	0.0252125	10	1.33831e-05	9.57572e-05	-0.147803	0.0655522	-0.072587	0.00320371	5	-0.186481	0.0105216	5
G7530_P3D03-SC_37C	G7530_P3D03	7530	P3D03	P3_SC_37C	SC_37C	CTAAGTGTGAAGGAG	-0.0627481	0.0205549	7	0.0125617	0.0263969	-0.133364	0.0706163	-0.123032	0.0677489	2	-0.0619021	0.00802571	5
G7530_P3D03-SC_37C	G7530_P3D03	7530	P3D03	P3_SC_37C	SC_37C	CTACTTACAACGGAA	0.00345836	0.00175546	9	0.258125	0.333001	-0.000334256	0.00379261	0.00315637	0.00169725	4	0.00438326	0.00297029	5
G7530_P3D03-SC_37C	G7530_P3D03	7530	P3D03	P3_SC_37C	SC_37C	CTAGTTGTATAGCCA	-0.0511075	0.0347535	7	0.325814	0.404209	-0.0337863	-0.0173212	-0.0472633	0.01086	3	-0.125962	0.0479221	4
G7530_P3D03-SC_37C	G7530_P3D03	7530	P3D03	P3_SC_37C	SC_37C	CTATCAAGGCTTAAT	-0.037223	0.00340134	10	3.54697e-05	0.000207908	-0.00951787	-0.0277051	-0.0397439	0.00484325	5	-0.0345362	0.00499998	5
G7530_P3D03-SC_37C	G7530_P3D03	7530	P3D03	P3_SC_37C	SC_37C	CTCGCTAATACTCCT	-0.00540217	0.000994581	10	0.000339858	0.00130105	-0.0144155	0.00901328	-0.00612337	0.00139918	5	-0.00465982	0.00141956	5
G7530_P3D03-SC_37C	G7530_P3D03	7530	P3D03	P3_SC_37C	SC_37C	CTCTTGAGAATACTT	-0.0525511	0.00280701	10	1.18531e-08	5.07757e-07	-0.100861	0.0483102	-0.0594957	0.00283998	5	-0.0467566	0.0025942	5
G7530_P3D03-SC_37C	G7530_P3D03	7530	P3D03	P3_SC_37C	SC_37C	CTGATTTGTGCTGTC	-0.0131088	0.00338241	9	0.0347061	0.0613642	0.0084187	-0.0215275	-0.013858	0.00553818	4	-0.0125644	0.00472087	5
G7530_P3D03-SC_37C	G7530_P3D03	7530	P3D03	P3_SC_37C	SC_37C	CTTGATCAATCAAAA	-0.0846551	0.00730025	10	2.30898e-07	4.09792e-06	-0.0987804	0.0141253	-0.108736	0.0093815	5	-0.0830244	0.00244128	5
G7530_P3D03-SC_37C	G7530_P3D03	7530	P3D03	P3_SC_37C	SC_37C	CTTGCAAGTGTAATT	-0.00178547	0.00133347	10	0.358429	0.437397	-0.00269507	0.000909606	-0.00167035	0.00125344	5	-0.00223722	0.00248303	5
G7530_P3D03-SC_37C	G7530_P3D03	7530	P3D03	P3_SC_37C	SC_37C	CTTTCTTGTGTATTT	-0.0511578	0.0210696	9	2.98695e-05	0.000180799	-0.080249	0.0290912	-0.132512	0.0209958	4	-0.0495045	0.00299305	5
G7530_P3D03-SC_37C	G7530_P3D03	7530	P3D03	P3_SC_37C	SC_37C	GAACTCAGGTTCCAT	-0.0266934	0.00435458	10	0.00012281	0.000564516	-0.0336499	0.00695647	-0.0368885	0.0072626	5	-0.0255244	0.00245931	5
G7530_P3D03-SC_37C	G7530_P3D03	7530	P3D03	P3_SC_37C	SC_37C	GAGAATGAAGGACAG	-0.0409883	0.00250883	10	1.42436e-09	1.31944e-07	-0.0393988	-0.00158951	-0.0477003	0.00185847	5	-0.0346252	0.00180953	5
G7530_P3D03-SC_37C	G7530_P3D03	7530	P3D03	P3_SC_37C	SC_37C	GAGTGCTTCAAAGTT	-0.00478263	0.00110385	10	6.23867e-05	0.00032805	0.00639281	-0.0111754	-0.00719315	0.00164494	5	-0.0039461	0.000969026	5
G7530_P3D03-SC_37C	G7530_P3D03	7530	P3D03	P3_SC_37C	SC_37C	GCAAGAAAGAAACCC	-0.0763931	0.00981482	4	0.0987878	0.148713	-0.0501908	-0.0262022	-0.0655414	0.0223152	1	-0.0800135	0.0128894	3
G7530_P3D03-SC_37C	G7530_P3D03	7530	P3D03	P3_SC_37C	SC_37C	GCCCTCGAAACCTAT	-0.0808771	0.0167981	10	0.00077283	0.00256792	-0.0594649	-0.0214121	-0.114963	0.0276841	5	-0.0722454	0.0139313	5
G7530_P3D03-SC_37C	G7530_P3D03	7530	P3D03	P3_SC_37C	SC_37C	GCTAATTTCAAGAAT	-0.113846	0.0317294	6	0.959657	0.969227	-0.1467	0.032854	-0.00335447	0.0623339	1	-0.135953	0.0278823	5
G7530_P3D03-SC_37C	G7530_P3D03	7530	P3D03	P3_SC_37C	SC_37C	GCTGCTTATGAGGAT	-0.0024263	0.00133411	10	0.00620483	0.014548	-0.00893866	0.00651236	-0.00513597	0.00207158	5	-0.00150486	0.00120803	5
G7530_P3D03-SC_37C	G7530_P3D03	7530	P3D03	P3_SC_37C	SC_37C	GGTGGAAGTAGCAGT	-0.00581381	0.0142637	8	0.822707	0.861577	-0.00624002	0.000426207	-0.00551779	0.00298783	3	-0.0223399	0.0223243	5
G7530_P3D03-SC_37C	G7530_P3D03	7530	P3D03	P3_SC_37C	SC_37C	GGTTGCCCAGAAGTA	-0.024355	0.00186669	10	1.3428e-05	9.59134e-05	-0.036133	0.011778	-0.0244865	0.00195157	5	-0.023954	0.00340831	5
G7530_P3D03-SC_37C	G7530_P3D03	7530	P3D03	P3_SC_37C	SC_37C	GTAATCTGACTCTAG	-0.146853	0.0280186	6	0.0176881	0.0351085	-0.0618965	-0.0849561	-0.130629	0.0226061	3	-0.202281	0.0417845	3
G7530_P3D03-SC_37C	G7530_P3D03	7530	P3D03	P3_SC_37C	SC_37C	GTACAAGAAATTTTG	-0.00946353	0.00443405	9	0.576552	0.648673	-0.0137529	0.00428935	-0.00311812	0.00446668	4	-0.0187097	0.00539183	5
G7530_P3D03-SC_37C	G7530_P3D03	7530	P3D03	P3_SC_37C	SC_37C	GTCACCGGCACTAAC	-0.0036701	0.00292973	9	0.46804	0.546683	-0.00534868	0.00167858	-0.00323226	0.00160767	4	-0.00784476	0.0049642	5
G7530_P3D03-SC_37C	G7530_P3D03	7530	P3D03	P3_SC_37C	SC_37C	GTGTGATTACTAAAT	-0.0869384	0.0242073	9	0.0259761	0.048289	-0.0463609	-0.0405775	-0.0802537	0.0107434	4	-0.148929	0.0327163	5
G7530_P3D03-SC_37C	G7530_P3D03	7530	P3D03	P3_SC_37C	SC_37C	GTTAAATCAACAGTT	-0.0107617	0.00147913	10	0.000194211	0.000820373	-0.0321192	0.0213576	-0.0074984	0.00152482	5	-0.0138775	0.00148998	5
G7530_P3D03-SC_37C	G7530_P3D03	7530	P3D03	P3_SC_37C	SC_37C	GTTCAGCTTTGATCG	-0.252289	0.0134382	8	6.77547e-06	5.55642e-05	-0.213555	-0.0387345	-0.282663	0.0235621	3	-0.242608	0.013302	5
G7530_P3D03-SC_37C	G7530_P3D03	7530	P3D03	P3_SC_37C	SC_37C	GTTGAACTGGTTGTT	-0.0189331	0.00523144	9	0.000286955	0.0011312	-0.00922277	-0.00971031	-0.0357181	0.00790834	4	-0.0178471	0.00201158	5
G7530_P3D03-SC_37C	G7530_P3D03	7530	P3D03	P3_SC_37C	SC_37C	GTTGGGCGCTTAAAG	0.00170242	0.00110393	10	0.23721	0.310239	-0.000664285	0.00236671	0.00166932	0.00179182	5	0.00172369	0.00143607	5
G7530_P3D03-SC_37C	G7530_P3D03	7530	P3D03	P3_SC_37C	SC_37C	GTTTAGCTTCCGTTG	-0.0853006	0.0196752	10	0.0121323	0.0256548	-0.0426792	-0.0426213	-0.083833	0.00696693	5	-0.124729	0.0361118	5
G7530_P3D03-SC_37C	G7530_P3D03	7530	P3D03	P3_SC_37C	SC_37C	GTTTGTTTTGGGAAA	-0.135934	0.00909285	9	4.19675e-05	0.000238173	-0.082592	-0.0533421	-0.122199	0.0182414	4	-0.138349	0.00764858	5
G7530_P3D03-SC_37C	G7530_P3D03	7530	P3D03	P3_SC_37C	SC_37C	TAACCTCGCGCTGAG	-0.0177989	0.00765872	10	9.1475e-05	0.000448801	0.00308065	-0.0208795	-0.0449177	0.00870845	5	-0.0165021	0.00190435	5
G7530_P3D03-SC_37C	G7530_P3D03	7530	P3D03	P3_SC_37C	SC_37C	TAATATTGTTTTGCG	-0.205801	0.0147868	6	0.000478942	0.00173216	-0.109047	-0.0967539	-0.263436	0.0253043	1	-0.194245	0.0113304	5
G7530_P3D03-SC_37C	G7530_P3D03	7530	P3D03	P3_SC_37C	SC_37C	TAGACGGACATCTTC	-0.0144641	0.0145585	9	0.314688	0.392753	0.000336127	-0.0148002	0.0207337	0.0283661	4	-0.0158494	0.00562758	5
G7530_P3D03-SC_37C	G7530_P3D03	7530	P3D03	P3_SC_37C	SC_37C	TATATTGAACTTTAC	-0.0031842	0.0014247	10	0.345883	0.424708	0.0042387	-0.0074229	-0.00161473	0.00170589	5	-0.00542074	0.0020364	5
G7530_P3D03-SC_37C	G7530_P3D03	7530	P3D03	P3_SC_37C	SC_37C	TATGCCCTTCTTCTG	-0.0125185	0.00180227	10	6.52053e-08	1.68832e-06	-0.0127424	0.000223944	-0.018717	0.00170577	5	-0.0105511	0.000960998	5
G7530_P3D03-SC_37C	G7530_P3D03	7530	P3D03	P3_SC_37C	SC_37C	TCAAAACGGAGTGTT	0.000999735	0.00138585	10	0.624084	0.692642	-0.00216713	0.00316686	-0.000856813	0.00244224	5	0.00148148	0.00124407	5
G7530_P3D03-SC_37C	G7530_P3D03	7530	P3D03	P3_SC_37C	SC_37C	TCAAAGCATGAAAAA	-0.0374143	0.00150576	10	1.00403e-08	4.71005e-07	-0.0702694	0.0328551	-0.0402947	0.0023039	5	-0.0361985	0.00149682	5
G7530_P3D03-SC_37C	G7530_P3D03	7530	P3D03	P3_SC_37C	SC_37C	TCAAATGATGAGGAT	-0.0396846	0.00289701	10	4.10498e-07	6.34438e-06	-0.0161742	-0.0235104	-0.0456153	0.00324651	5	-0.0339909	0.00318098	5
G7530_P3D03-SC_37C	G7530_P3D03	7530	P3D03	P3_SC_37C	SC_37C	TCAACAACCTATGCA	-0.00373101	0.00132006	10	0.287532	0.364447	0.00126751	-0.00499853	-0.00156938	0.00175652	5	-0.00553022	0.00160251	5
G7530_P3D03-SC_37C	G7530_P3D03	7530	P3D03	P3_SC_37C	SC_37C	TCATAGGTATCTCGC	0.00111154	0.000933885	10	0.618466	0.687817	-0.0034091	0.00452064	0.000478513	0.0014497	5	0.00155236	0.00120976	5
G7530_P3D03-SC_37C	G7530_P3D03	7530	P3D03	P3_SC_37C	SC_37C	TCGAAAGCACAGTAG	-0.0867421	0.0105779	9	0.000414007	0.00153172	-0.151621	0.0648785	-0.0906919	0.0112275	5	-0.0741504	0.0200465	4
G7530_P3D03-SC_37C	G7530_P3D03	7530	P3D03	P3_SC_37C	SC_37C	TCGATAGAATTTACT	-0.0500961	0.00500417	10	3.58946e-09	2.34104e-07	-0.0528411	0.00274503	-0.0668333	0.00291586	5	-0.039416	0.00232923	5
G7530_P3D03-SC_37C	G7530_P3D03	7530	P3D03	P3_SC_37C	SC_37C	TCTTGGAGGTGAATG	-0.041947	0.00165252	10	6.08181e-08	1.62577e-06	-0.0609332	0.0189862	-0.0410184	0.00200289	5	-0.0436051	0.00267648	5
G7530_P3D03-SC_37C	G7530_P3D03	7530	P3D03	P3_SC_37C	SC_37C	TGATCATCACGGGAC	-0.0587926	0.010451	10	3.89762e-06	3.5753e-05	-0.0368104	-0.0219822	-0.0516104	0.0025779	5	-0.100421	0.0062063	5
G7530_P3D03-SC_37C	G7530_P3D03	7530	P3D03	P3_SC_37C	SC_37C	TGGAGTCTTTGTTGA	-0.0633203	0.00586916	10	5.27325e-09	2.99949e-07	-0.0760209	0.0127006	-0.0860142	0.00459891	5	-0.0603818	0.00165487	5
G7530_P3D03-SC_37C	G7530_P3D03	7530	P3D03	P3_SC_37C	SC_37C	TTAATTAGAGGTATG	-0.0121858	0.00299911	9	0.173628	0.238649	-0.0165451	0.00435934	-0.00615054	0.00553351	4	-0.0133797	0.00246112	5
G7530_P3D03-SC_37C	G7530_P3D03	7530	P3D03	P3_SC_37C	SC_37C	TTAATTGCACTTATG	-0.017123	0.00388942	5	0.157286	0.219801	-0.0441327	0.0270098	-0.0184798	0.0099146	1	-0.0167803	0.00498273	4
G7530_P3D03-SC_37C	G7530_P3D03	7530	P3D03	P3_SC_37C	SC_37C	TTAGTCTTTCCATCA	-0.162411	0.0112144	10	1.18519e-08	5.07757e-07	-0.183045	0.0206338	-0.151252	0.00422047	5	-0.204797	0.00822522	5
G7530_P3D03-SC_37C	G7530_P3D03	7530	P3D03	P3_SC_37C	SC_37C	TTATATTTATTTGCT	-0.00125825	0.0014827	10	0.312786	0.390771	-0.0132206	0.0119624	-0.00208068	0.00212276	5	-0.000379641	0.00219407	5
G7530_P3D03-SC_37C	G7530_P3D03	7530	P3D03	P3_SC_37C	SC_37C	TTTAACTCACCGTAA	-0.0147641	0.00241571	10	0.00816824	0.0184266	-0.0184056	0.00364151	-0.0113772	0.00441082	5	-0.0153956	0.00190445	5
G7530_P3D03-SC_37C	G7530_P3D03	7530	P3D03	P3_SC_37C	SC_37C	TTTATAAATCAATAG	-0.00110418	0.00108597	10	0.0375377	0.0655821	-0.000226545	-0.000877634	0.00154059	0.00126379	5	-0.00280506	0.00101349	5
G7530_P3D03-SC_37C	G7530_P3D03	7530	P3D03	P3_SC_37C	SC_37C	TTTTGCATTTAGGCG	-0.0256525	0.00151809	10	1.76065e-08	6.85388e-07	-0.00776484	-0.0178876	-0.0298909	0.00212469	5	-0.0247567	0.000976779	5
G7530_P3D03-SC_37C	G7530_P3D03	7530	P3D03	P3_SC_37C	SC_37C	AATGATACCATTTTT	-0.188002	0.0345672	5	0.00554287	0.0132047						-0.188002	0.0345672	5
G7530_P3D03-SC_37C	G7530_P3D03	7530	P3D03	P3_SC_37C	SC_37C	TACACCAATTACACT	-0.210063	0.0116753	3	0.003062	0.0080049						-0.210063	0.0116753	3
G2640_P3G06-SC_37C	G2640_P3G06	2640	P3G06	P3_SC_37C	SC_37C	AAAACATTATCAAAG	0.00130742	0.00162333	10	0.960751	0.969941	-0.00194739	0.00325481	8.39922e-05	0.00292916	5	0.00162501	0.00149238	5
G2640_P3G06-SC_37C	G2640_P3G06	2640	P3G06	P3_SC_37C	SC_37C	AAAAGAAAAATGTAT	0.00163754	0.00171685	10	0.0556121	0.0913209	0.0167521	-0.0151145	0.00386142	0.00298714	5	0.00104789	0.00153814	5
G2640_P3G06-SC_37C	G2640_P3G06	2640	P3G06	P3_SC_37C	SC_37C	AAAAGCGACATTTCT	-0.010387	0.00208535	10	0.000150464	0.00066766	-0.0396226	0.0292356	-0.0140275	0.00289172	5	-0.0079048	0.00238778	5
G2640_P3G06-SC_37C	G2640_P3G06	2640	P3G06	P3_SC_37C	SC_37C	AATGATACCATTTTT	-0.0807625	0.00955974	10	3.71843e-06	3.44903e-05			-0.07035	0.00443078	5	-0.115328	0.00807275	5
G2640_P3G06-SC_37C	G2640_P3G06	2640	P3G06	P3_SC_37C	SC_37C	ACAACCTACCTGCTA	-0.00177536	0.00537217	10	0.104097	0.155167	-0.00239255	0.000617198	-0.0126057	0.00989778	5	-0.00156338	0.00138473	5
G2640_P3G06-SC_37C	G2640_P3G06	2640	P3G06	P3_SC_37C	SC_37C	ACAAGTTTTACAGTT	-0.0224033	0.00176417	10	4.03789e-06	3.67165e-05	-0.0260819	0.0036786	-0.0203527	0.00294125	5	-0.0232284	0.00186577	5
G2640_P3G06-SC_37C	G2640_P3G06	2640	P3G06	P3_SC_37C	SC_37C	ACAGGGCAGCTCCCG	-0.0234662	0.0034539	10	0.00152328	0.00448275	-0.0397814	0.0163152	-0.0153728	0.00386726	5	-0.0297931	0.00341926	5
G2640_P3G06-SC_37C	G2640_P3G06	2640	P3G06	P3_SC_37C	SC_37C	ACAGTTGACGGACAG	-0.002029	0.00146182	10	0.197769	0.266135	-0.00517114	0.00314215	-0.00189088	0.00257307	5	-0.00207777	0.00152913	5
G2640_P3G06-SC_37C	G2640_P3G06	2640	P3G06	P3_SC_37C	SC_37C	ACCACCGGTCCTGCC	-0.00472244	0.00248761	10	0.287251	0.364203	-0.000431459	-0.00429098	0.00203945	0.00271349	5	-0.0087372	0.00209086	5
G2640_P3G06-SC_37C	G2640_P3G06	2640	P3G06	P3_SC_37C	SC_37C	AGAACATCATCTACA	-0.0988303	0.00446057	10	1.40281e-07	2.84143e-06	-0.223556	0.124725	-0.088899	0.00643537	5	-0.103171	0.00425452	5
G2640_P3G06-SC_37C	G2640_P3G06	2640	P3G06	P3_SC_37C	SC_37C	AGAAGACGACGATGA	-0.0464001	0.0027468	10	9.46147e-09	4.56827e-07	-0.0663318	0.0199317	-0.038672	0.00246598	5	-0.0520117	0.00210136	5
G2640_P3G06-SC_37C	G2640_P3G06	2640	P3G06	P3_SC_37C	SC_37C	AGATTCATCCCATGG	-0.000536011	0.00218859	10	0.285101	0.361955	0.0346566	-0.0351926	0.00286563	0.0038014	5	-0.0013362	0.00184372	5
G2640_P3G06-SC_37C	G2640_P3G06	2640	P3G06	P3_SC_37C	SC_37C	AGTGTATGATAATAT	-0.0262338	0.0015138	10	6.58894e-08	1.69131e-06	-0.0233157	-0.00291811	-0.0270728	0.00279625	5	-0.026056	0.0012874	5
G2640_P3G06-SC_37C	G2640_P3G06	2640	P3G06	P3_SC_37C	SC_37C	AGTGTTAATCAGACC	-0.0043586	0.0027434	10	0.0116851	0.0249036	-0.0221393	0.0177807	-0.0100504	0.00435855	5	-0.00272485	0.00233512	5
G2640_P3G06-SC_37C	G2640_P3G06	2640	P3G06	P3_SC_37C	SC_37C	AGTTTATAAAAAATT	-0.00838356	0.00328937	10	0.294708	0.372104	0.0188846	-0.0272682	-0.00467104	0.0043168	5	-0.0126489	0.00462703	5
G2640_P3G06-SC_37C	G2640_P3G06	2640	P3G06	P3_SC_37C	SC_37C	ATAATTTTCATCCAC	-0.131713	0.0103976	6	0.00132896	0.00401523	-0.104223	-0.0274903	-0.132226	0.00242645	2	-0.115799	0.0135206	4
G2640_P3G06-SC_37C	G2640_P3G06	2640	P3G06	P3_SC_37C	SC_37C	ATAGAGCGGCGTTGA	-0.0213577	0.00539158	9	0.0138821	0.0286166	-0.0178801	-0.0034776	-0.0187734	0.00383905	5	-0.0355214	0.00898761	4
G2640_P3G06-SC_37C	G2640_P3G06	2640	P3G06	P3_SC_37C	SC_37C	ATAGTCGATTAAGAT	-0.114056	0.0109413	10	2.54056e-05	0.000159274	-0.0361705	-0.0778859	-0.122124	0.0105428	5	-0.092603	0.017192	5
G2640_P3G06-SC_37C	G2640_P3G06	2640	P3G06	P3_SC_37C	SC_37C	ATATTGAGTAAGTAC	-3.48861e-05	0.00475218	10	0.119766	0.174801	-0.0106469	0.010612	-0.0102581	0.00836659	5	0.000655213	0.00217376	5
G2640_P3G06-SC_37C	G2640_P3G06	2640	P3G06	P3_SC_37C	SC_37C	ATCGTTGGCATTTGG	-0.0442748	0.00575673	10	2.61627e-07	4.5387e-06	-0.0437201	-0.000554716	-0.023925	0.00250691	5	-0.0561086	0.0019117	5
G2640_P3G06-SC_37C	G2640_P3G06	2640	P3G06	P3_SC_37C	SC_37C	ATGAAGTTCATAATG	-0.00286779	0.00502171	4	0.820904	0.860195	0.0100138	-0.0128816	0.00115928	0.0037233	2	-0.0121711	0.00565917	2
G2640_P3G06-SC_37C	G2640_P3G06	2640	P3G06	P3_SC_37C	SC_37C	ATGGCGATGGTCTTG	-0.000647382	0.00250674	10	0.226004	0.297919	-0.007843	0.00719561	0.0038151	0.00416742	5	-0.00190261	0.00221025	5
G2640_P3G06-SC_37C	G2640_P3G06	2640	P3G06	P3_SC_37C	SC_37C	ATTAATACTTTGCAG	-0.150698	0.00696614	9	1.10353e-06	1.34508e-05	-0.105046	-0.0456522	-0.152022	0.00840946	5	-0.147519	0.01303	4
G2640_P3G06-SC_37C	G2640_P3G06	2640	P3G06	P3_SC_37C	SC_37C	ATTATCAAGTGCCAG	-0.0931892	0.00369781	10	3.17133e-08	1.01382e-06	-0.104003	0.0108138	-0.0872142	0.00441226	5	-0.0998033	0.00464225	5
G2640_P3G06-SC_37C	G2640_P3G06	2640	P3G06	P3_SC_37C	SC_37C	ATTATCATCGCCATC	-0.0901395	0.0466418	7	0.497144	0.574802	-0.127728	0.0375882	-0.0350857	0.0232562	2	-0.201731	0.0331102	5
G2640_P3G06-SC_37C	G2640_P3G06	2640	P3G06	P3_SC_37C	SC_37C	CAAGGATCCCCGTAG	-0.00518161	0.0111412	9	0.755233	0.804991	-0.0174624	0.0122808	-0.0044661	0.00403997	5	-0.0286238	0.0231244	4
G2640_P3G06-SC_37C	G2640_P3G06	2640	P3G06	P3_SC_37C	SC_37C	CAAGTTCGGCGAAAT	-0.00270364	0.00224765	9	0.00247412	0.0066855	-0.00943237	0.00672872	0.00408727	0.00239271	5	-0.00426812	0.00114845	4
G2640_P3G06-SC_37C	G2640_P3G06	2640	P3G06	P3_SC_37C	SC_37C	CAATCTTGAATTGAT	-0.0091016	0.00246861	10	0.333311	0.412033	-0.000313742	-0.00878786	-0.0018896	0.00297768	5	-0.0117075	0.00178991	5
G2640_P3G06-SC_37C	G2640_P3G06	2640	P3G06	P3_SC_37C	SC_37C	CAATTTCAACGTTGT	-0.0675225	0.00738675	10	0.000268387	0.0010661	-0.0701227	0.0026002	-0.0675127	0.00362531	5	-0.0676952	0.0152229	5
G2640_P3G06-SC_37C	G2640_P3G06	2640	P3G06	P3_SC_37C	SC_37C	CATATGCATTCCTTG	0.00138472	0.00158007	10	0.558254	0.632082	-0.00684678	0.0082315	0.000985797	0.00315559	5	0.00140817	0.000765036	5
G2640_P3G06-SC_37C	G2640_P3G06	2640	P3G06	P3_SC_37C	SC_37C	CATCAATGAGGCAGT	-0.135877	0.00880454	10	4.93843e-06	4.33226e-05	-0.195177	0.0592997	-0.123469	0.0115292	5	-0.148601	0.0116749	5
G2640_P3G06-SC_37C	G2640_P3G06	2640	P3G06	P3_SC_37C	SC_37C	CATTGTCGGACGCTT	-0.0541299	0.00738666	7	0.0107117	0.0231539			-0.0462008	0.0159081	3	-0.0555798	0.00680257	4
G2640_P3G06-SC_37C	G2640_P3G06	2640	P3G06	P3_SC_37C	SC_37C	CATTTATGGCTATCT	-0.0299978	0.00418543	10	0.00117435	0.00362731	-0.0957317	0.0657339	-0.0259677	0.00468963	5	-0.0371839	0.0062622	5
G2640_P3G06-SC_37C	G2640_P3G06	2640	P3G06	P3_SC_37C	SC_37C	CCAACACAGGCTTCG	-0.0473772	0.00408068	10	2.51542e-05	0.000158175	-0.0257215	-0.0216557	-0.0500272	0.00808616	5	-0.0470886	0.00266823	5
G2640_P3G06-SC_37C	G2640_P3G06	2640	P3G06	P3_SC_37C	SC_37C	CCAAGACCGTGTAAA	-0.142315	0.0230467	10	0.00105231	0.00331444	-0.233836	0.0915212	-0.166325	0.0393155	5	-0.13187	0.0259309	5
G2640_P3G06-SC_37C	G2640_P3G06	2640	P3G06	P3_SC_37C	SC_37C	CCAGGATGTACCGCC	-0.104073	0.00703005	10	3.52165e-08	1.08319e-06	-0.0966343	-0.00743847	-0.0770253	0.00539761	5	-0.108515	0.00218749	5
G2640_P3G06-SC_37C	G2640_P3G06	2640	P3G06	P3_SC_37C	SC_37C	CCGTTAGTATCGCTA	0.00965793	0.00253513	10	0.416612	0.496625	-0.00985291	0.0195108	0.0014861	0.00319146	5	0.0105959	0.00108125	5
G2640_P3G06-SC_37C	G2640_P3G06	2640	P3G06	P3_SC_37C	SC_37C	CGAACAGAAACACAA	-0.0311548	0.0174496	8	0.00567917	0.0134753	-0.0491679	0.018013	-0.0715689	0.0205406	5	-0.0252779	0.00783291	3
G2640_P3G06-SC_37C	G2640_P3G06	2640	P3G06	P3_SC_37C	SC_37C	CGAATGCCATACAAA	-0.00167604	0.00498564	10	0.264792	0.340123	-0.0134127	0.0117367	-0.00825784	0.00940907	5	-0.000809591	0.00341386	5
G2640_P3G06-SC_37C	G2640_P3G06	2640	P3G06	P3_SC_37C	SC_37C	CGATGATGATGATGA	-0.00312403	0.00192159	10	0.767726	0.815567	-0.00514166	0.00201764	-0.000648592	0.00340133	5	-0.00371784	0.00166589	5
G2640_P3G06-SC_37C	G2640_P3G06	2640	P3G06	P3_SC_37C	SC_37C	CGCGATCAATCCTCT	-0.0209976	0.00281036	10	0.00108154	0.00338596	-0.0589946	0.037997	-0.0161999	0.00397804	5	-0.0242375	0.00326896	5
G2640_P3G06-SC_37C	G2640_P3G06	2640	P3G06	P3_SC_37C	SC_37C	CTAAGCAGTCTTCTC	-0.0811474	0.00421229	10	2.45612e-09	1.94878e-07	-0.147803	0.0666554	-0.0953959	0.00496597	5	-0.0794039	0.00173713	5
G2640_P3G06-SC_37C	G2640_P3G06	2640	P3G06	P3_SC_37C	SC_37C	CTAAGTGTGAAGGAG	-0.0499922	0.00466675	10	4.48223e-05	0.000250045	-0.133364	0.0833721	-0.0491672	0.00276885	5	-0.0579304	0.00858845	5
G2640_P3G06-SC_37C	G2640_P3G06	2640	P3G06	P3_SC_37C	SC_37C	CTACTTACAACGGAA	0.00675813	0.00158994	10	0.0131991	0.0274446	-0.000334256	0.00709238	0.00460853	0.00298059	5	0.00692214	0.000823316	5
G2640_P3G06-SC_37C	G2640_P3G06	2640	P3G06	P3_SC_37C	SC_37C	CTAGTTGTATAGCCA	-0.0621168	0.0144033	10	0.00219698	0.00606959	-0.0337863	-0.0283305	-0.0869376	0.0260151	5	-0.0584932	0.00994005	5
G2640_P3G06-SC_37C	G2640_P3G06	2640	P3G06	P3_SC_37C	SC_37C	CTATCAAGGCTTAAT	-0.0263728	0.00291626	10	0.000144663	0.000646599	-0.00951787	-0.0168549	-0.0268604	0.00299497	5	-0.02485	0.00529242	5
G2640_P3G06-SC_37C	G2640_P3G06	2640	P3G06	P3_SC_37C	SC_37C	CTCGCTAATACTCCT	-0.00193484	0.0013757	10	0.101827	0.152318	-0.0144155	0.0124806	-0.00207628	0.00261813	5	-0.00191411	0.00100241	5
G2640_P3G06-SC_37C	G2640_P3G06	2640	P3G06	P3_SC_37C	SC_37C	CTCTTGAGAATACTT	-0.0253457	0.00201394	10	5.53393e-06	4.72813e-05	-0.100861	0.0755157	-0.0260118	0.00305591	5	-0.0247703	0.00284037	5
G2640_P3G06-SC_37C	G2640_P3G06	2640	P3G06	P3_SC_37C	SC_37C	CTGATTTGTGCTGTC	-0.010564	0.00290175	8	0.145813	0.206268	0.0084187	-0.0189827	-0.00518117	0.00384838	4	-0.0141109	0.00312387	4
G2640_P3G06-SC_37C	G2640_P3G06	2640	P3G06	P3_SC_37C	SC_37C	CTTGATCAATCAAAA	-0.0714994	0.00171853	10	1.17543e-11	8.13464e-09	-0.0987804	0.0272809	-0.0749791	0.00246593	5	-0.0698626	0.00169128	5
G2640_P3G06-SC_37C	G2640_P3G06	2640	P3G06	P3_SC_37C	SC_37C	CTTGATGGCTGAAAG	-0.0303515	0.0274516	3	0.567666	0.640584			-0.037152	0.046079	2	-0.0167799	0.065095	1
G2640_P3G06-SC_37C	G2640_P3G06	2640	P3G06	P3_SC_37C	SC_37C	CTTGCAAGTGTAATT	-0.00155764	0.00285942	10	0.0143882	0.0295008	-0.00269507	0.00113744	-0.00860985	0.00371287	5	0.00194733	0.00261751	5
G2640_P3G06-SC_37C	G2640_P3G06	2640	P3G06	P3_SC_37C	SC_37C	CTTTCTTGTGTATTT	-0.039622	0.0019527	10	1.50144e-07	2.97826e-06	-0.080249	0.040627	-0.0399646	0.00369342	5	-0.0395508	0.00168368	5
G2640_P3G06-SC_37C	G2640_P3G06	2640	P3G06	P3_SC_37C	SC_37C	GAACTCAGGTTCCAT	-0.0266069	0.00200273	10	4.0055e-06	3.65542e-05	-0.0336499	0.00704299	-0.0270568	0.00319879	5	-0.0262952	0.00266272	5
G2640_P3G06-SC_37C	G2640_P3G06	2640	P3G06	P3_SC_37C	SC_37C	GAGAATGAAGGACAG	-0.0205021	0.00210725	10	7.45705e-07	1.00518e-05	-0.0393988	0.0188967	-0.0256863	0.00317621	5	-0.0193701	0.00148421	5
G2640_P3G06-SC_37C	G2640_P3G06	2640	P3G06	P3_SC_37C	SC_37C	GAGTGCTTCAAAGTT	0.00878721	0.00155015	10	0.000542724	0.00192175	0.00639281	0.00239441	0.00861106	0.00296893	5	0.00881397	0.00115713	5
G2640_P3G06-SC_37C	G2640_P3G06	2640	P3G06	P3_SC_37C	SC_37C	GCAAGAAAGAAACCC	-0.0877102	0.0273437	4	0.195875	0.263986	-0.0501908	-0.0375194	-0.0764098	0.0282197	2	-0.121763	0.0489874	2
G2640_P3G06-SC_37C	G2640_P3G06	2640	P3G06	P3_SC_37C	SC_37C	GCCCTCGAAACCTAT	-0.0697518	0.00482605	10	8.19699e-06	6.47906e-05	-0.0594649	-0.0102869	-0.070555	0.00858593	5	-0.0694222	0.00549999	5
G2640_P3G06-SC_37C	G2640_P3G06	2640	P3G06	P3_SC_37C	SC_37C	GCTAATTTCAAGAAT	-0.101455	0.00829868	10	2.04757e-06	2.15975e-05	-0.1467	0.045245	-0.116074	0.00949928	5	-0.085256	0.00999919	5
G2640_P3G06-SC_37C	G2640_P3G06	2640	P3G06	P3_SC_37C	SC_37C	GCTGCGGAGCCTCAG	-0.135704	0.0105776	9	1.40272e-05	9.9113e-05			-0.10913	0.0119924	5	-0.14949	0.00863753	4
G2640_P3G06-SC_37C	G2640_P3G06	2640	P3G06	P3_SC_37C	SC_37C	GCTGCTTATGAGGAT	-0.000983621	0.00155166	10	0.0697301	0.110865	-0.00893866	0.00795503	0.00220869	0.00254354	5	-0.00152271	0.00104524	5
G2640_P3G06-SC_37C	G2640_P3G06	2640	P3G06	P3_SC_37C	SC_37C	GGTGGAAGTAGCAGT	-3.19509e-05	0.00545314	9	0.870328	0.899575	-0.00624002	0.00620807	-0.00144429	0.0119097	4	0.000168671	0.00448868	5
G2640_P3G06-SC_37C	G2640_P3G06	2640	P3G06	P3_SC_37C	SC_37C	GGTTGCCCAGAAGTA	-0.0497836	0.00360179	10	1.41782e-06	1.62482e-05	-0.036133	-0.0136506	-0.0431325	0.00353623	5	-0.0583029	0.00400216	5
G2640_P3G06-SC_37C	G2640_P3G06	2640	P3G06	P3_SC_37C	SC_37C	GTAATCTGACTCTAG	-0.116134	0.00808021	10	1.16297e-05	8.57228e-05	-0.0618965	-0.054237	-0.114829	0.0121849	5	-0.117398	0.0119939	5
G2640_P3G06-SC_37C	G2640_P3G06	2640	P3G06	P3_SC_37C	SC_37C	GTACAAGAAATTTTG	-0.00666393	0.00384568	10	0.811659	0.852659	-0.0137529	0.00708894	-0.0012476	0.00612406	5	-0.0094295	0.00437601	5
G2640_P3G06-SC_37C	G2640_P3G06	2640	P3G06	P3_SC_37C	SC_37C	GTCACCGGCACTAAC	0.00213019	0.00337217	10	0.369807	0.449608	-0.00534868	0.00747887	-0.00395476	0.00539596	5	0.00439966	0.00329535	5
G2640_P3G06-SC_37C	G2640_P3G06	2640	P3G06	P3_SC_37C	SC_37C	GTGTGATTACTAAAT	-0.0747375	0.00886586	10	4.87979e-05	0.000267551	-0.0463609	-0.0283766	-0.0706732	0.00466271	5	-0.101765	0.012024	5
G2640_P3G06-SC_37C	G2640_P3G06	2640	P3G06	P3_SC_37C	SC_37C	GTTAAATCAACAGTT	-0.000279916	0.0017549	10	0.325701	0.404109	-0.0321192	0.0318393	0.00190088	0.00305642	5	-0.000883369	0.00160778	5
G2640_P3G06-SC_37C	G2640_P3G06	2640	P3G06	P3_SC_37C	SC_37C	GTTCAGCTTTGATCG	-0.0735585	0.00308974	10	1.25161e-09	1.24731e-07	-0.213555	0.139996	-0.0638694	0.00306856	5	-0.0780542	0.00209022	5
G2640_P3G06-SC_37C	G2640_P3G06	2640	P3G06	P3_SC_37C	SC_37C	GTTGAACTGGTTGTT	-0.0140916	0.00201901	9	0.000438431	0.00160917	-0.00922277	-0.0048688	-0.0146961	0.00345494	5	-0.0138398	0.0022295	4
G2640_P3G06-SC_37C	G2640_P3G06	2640	P3G06	P3_SC_37C	SC_37C	GTTGGGCGCTTAAAG	0.00111303	0.00133916	10	0.945298	0.958298	-0.000664285	0.00177731	-6.56794e-05	0.00241445	5	0.0013609	0.00110721	5
G2640_P3G06-SC_37C	G2640_P3G06	2640	P3G06	P3_SC_37C	SC_37C	GTTTAGCTTCCGTTG	-0.0813061	0.00450276	10	5.76163e-07	8.22137e-06	-0.0426792	-0.0386268	-0.0772157	0.00440381	5	-0.0907431	0.00668909	5
G2640_P3G06-SC_37C	G2640_P3G06	2640	P3G06	P3_SC_37C	SC_37C	GTTTGTTTTGGGAAA	-0.127442	0.00608602	9	4.14443e-07	6.38161e-06	-0.082592	-0.0448505	-0.134101	0.0073796	5	-0.117546	0.00899635	4
G2640_P3G06-SC_37C	G2640_P3G06	2640	P3G06	P3_SC_37C	SC_37C	TAACCTCGCGCTGAG	-0.00614001	0.00276946	10	0.497266	0.57489	0.00308065	-0.00922066	0.0016965	0.00353036	5	-0.00881614	0.00206306	5
G2640_P3G06-SC_37C	G2640_P3G06	2640	P3G06	P3_SC_37C	SC_37C	TAATATTGTTTTGCG	-0.152663	0.00773652	10	7.64488e-07	1.02181e-05	-0.109047	-0.043616	-0.155926	0.0114716	5	-0.149395	0.0114787	5
G2640_P3G06-SC_37C	G2640_P3G06	2640	P3G06	P3_SC_37C	SC_37C	TACACCAATTACACT	-0.156929	0.0144191	7	0.000132204	0.000599733			-0.170428	0.0167199	5	-0.132025	0.0227106	2
G2640_P3G06-SC_37C	G2640_P3G06	2640	P3G06	P3_SC_37C	SC_37C	TAGACGGACATCTTC	-0.0150768	0.00488898	10	0.00148505	0.00439006	0.000336127	-0.015413	-0.0270636	0.0081604	5	-0.0143121	0.00206114	5
G2640_P3G06-SC_37C	G2640_P3G06	2640	P3G06	P3_SC_37C	SC_37C	TATATTGAACTTTAC	-0.000274745	0.00171285	10	0.433496	0.5139	0.0042387	-0.00451344	-0.00151929	0.00303025	5	0.000123869	0.00171494	5
G2640_P3G06-SC_37C	G2640_P3G06	2640	P3G06	P3_SC_37C	SC_37C	TATGCCCTTCTTCTG	-0.00811282	0.00297723	10	0.31106	0.388927	-0.0127424	0.00462961	-0.00242609	0.0025355	5	-0.0160499	0.00299546	5
G2640_P3G06-SC_37C	G2640_P3G06	2640	P3G06	P3_SC_37C	SC_37C	TCAAAACGGAGTGTT	0.00361867	0.00134944	10	0.00655972	0.0152595	-0.00216713	0.0057858	0.00381936	0.00262686	5	0.00360029	0.000794982	5
G2640_P3G06-SC_37C	G2640_P3G06	2640	P3G06	P3_SC_37C	SC_37C	TCAAAGCATGAAAAA	-0.0389469	0.00134964	10	2.20746e-10	3.78455e-08	-0.0702694	0.0313225	-0.0379101	0.00240334	5	-0.0392131	0.00121758	5
G2640_P3G06-SC_37C	G2640_P3G06	2640	P3G06	P3_SC_37C	SC_37C	TCAAATGATGAGGAT	-0.0151315	0.00203692	10	0.000406794	0.00150922	-0.0161742	0.00104265	-0.0144702	0.00297595	5	-0.0157993	0.00299026	5
G2640_P3G06-SC_37C	G2640_P3G06	2640	P3G06	P3_SC_37C	SC_37C	TCAACAACCTATGCA	-0.00464888	0.00172049	10	0.0643674	0.103395	0.00126751	-0.00591639	-0.00408296	0.00332606	5	-0.00472685	0.00123459	5
G2640_P3G06-SC_37C	G2640_P3G06	2640	P3G06	P3_SC_37C	SC_37C	TCAGAGCATTGGCCT	-0.087074	0.0187979	6	0.961426	0.970445			-0.00106066	0.0207283	1	-0.104182	0.00924432	5
G2640_P3G06-SC_37C	G2640_P3G06	2640	P3G06	P3_SC_37C	SC_37C	TCATAGGTATCTCGC	0.00322969	0.00149132	10	0.00133499	0.00402564	-0.0034091	0.00663878	0.00553131	0.00257393	5	0.0027601	0.00116262	5
G2640_P3G06-SC_37C	G2640_P3G06	2640	P3G06	P3_SC_37C	SC_37C	TCGAAAGCACAGTAG	-0.0699915	0.0144991	10	0.00539543	0.0129004	-0.151621	0.0816291	-0.0806684	0.0290653	5	-0.0690833	0.0084772	5
G2640_P3G06-SC_37C	G2640_P3G06	2640	P3G06	P3_SC_37C	SC_37C	TCGATAGAATTTACT	-0.0365412	0.00478231	10	5.3469e-07	7.82684e-06	-0.0528411	0.0162999	-0.0531453	0.00544953	5	-0.0348865	0.00172032	5
G2640_P3G06-SC_37C	G2640_P3G06	2640	P3G06	P3_SC_37C	SC_37C	TCTTGGAGGTGAATG	-0.0745966	0.00473135	10	1.02535e-08	4.7132e-07	-0.0609332	-0.0136634	-0.0899068	0.00498279	5	-0.0690571	0.00299721	5
G2640_P3G06-SC_37C	G2640_P3G06	2640	P3G06	P3_SC_37C	SC_37C	TGGAGTCTTTGTTGA	-0.0500823	0.00432034	10	1.30117e-05	9.37397e-05	-0.0760209	0.0259386	-0.0481461	0.00304808	5	-0.0600954	0.0069317	5
G2640_P3G06-SC_37C	G2640_P3G06	2640	P3G06	P3_SC_37C	SC_37C	TTAATTAGAGGTATG	-0.0144757	0.00238701	10	0.00207691	0.00579441	-0.0165451	0.00206949	-0.0139174	0.00306185	5	-0.0153884	0.003915	5
G2640_P3G06-SC_37C	G2640_P3G06	2640	P3G06	P3_SC_37C	SC_37C	TTAATTGCACTTATG	-0.00357428	0.0111444	8	0.885083	0.911122	-0.0441327	0.0405584	0.00252489	0.0223382	4	-0.00439434	0.008191	4
G2640_P3G06-SC_37C	G2640_P3G06	2640	P3G06	P3_SC_37C	SC_37C	TTAGTCTTTCCATCA	-0.104683	0.00410473	10	7.08329e-08	1.75845e-06	-0.183045	0.0783624	-0.107866	0.00730613	5	-0.103554	0.00435156	5
G2640_P3G06-SC_37C	G2640_P3G06	2640	P3G06	P3_SC_37C	SC_37C	TTATATTTATTTGCT	-0.000649821	0.00204924	10	0.826122	0.864645	-0.0132206	0.0125708	-0.000576711	0.00406759	5	-0.000657327	0.00130336	5
G2640_P3G06-SC_37C	G2640_P3G06	2640	P3G06	P3_SC_37C	SC_37C	TTTAACTCACCGTAA	-0.0262145	0.00343253	10	0.00153064	0.00450016	-0.0184056	-0.00780886	-0.018023	0.00530126	5	-0.0281302	0.00256367	5
G2640_P3G06-SC_37C	G2640_P3G06	2640	P3G06	P3_SC_37C	SC_37C	TTTATAAATCAATAG	0.00239221	0.00126861	10	0.0548452	0.0903115	-0.000226545	0.00261875	0.00168167	0.00225188	5	0.00258608	0.0011763	5
G2640_P3G06-SC_37C	G2640_P3G06	2640	P3G06	P3_SC_37C	SC_37C	TTTTGCATTTAGGCG	-0.0679519	0.00280018	10	9.95787e-08	2.20317e-06	-0.00776484	-0.0601871	-0.0682186	0.00354403	5	-0.0674848	0.00469043	5
G2640_P3G06-SC_37C	G2640_P3G06	2640	P3G06	P3_SC_37C	SC_37C	TGATCATCACGGGAC	-0.205133	0.0253645	5	0.00126841	0.0038746	-0.0368104	-0.168322				-0.205133	0.0253645	5
G2640_P3D03-SC_37C	G2640_P3D03	2640	P3D03	P3_SC_37C	SC_37C	AAAACATTATCAAAG	-0.00102047	0.00423706	8	0.0127147	0.026642	-0.00194739	0.000926924	-0.0137864	0.00430196	3	0.00547299	0.00306816	5
G2640_P3D03-SC_37C	G2640_P3D03	2640	P3D03	P3_SC_37C	SC_37C	AAAAGAAAAATGTAT	0.00196665	0.00559689	10	0.0557969	0.0915519	0.0167521	-0.0147854	-0.0138107	0.00860856	5	0.00287193	0.00206207	5
G2640_P3D03-SC_37C	G2640_P3D03	2640	P3D03	P3_SC_37C	SC_37C	AAAAGCGACATTTCT	-0.00543519	0.00442857	8	0.570745	0.64336	-0.0396226	0.0341874	-0.0025595	0.00197716	3	-0.0174179	0.00403597	5
G2640_P3D03-SC_37C	G2640_P3D03	2640	P3D03	P3_SC_37C	SC_37C	AATGATACCATTTTT	-0.19698	0.0342195	5	0.0341031	0.0604816			-0.195	0.0106547	2	-0.244599	0.0522473	3
G2640_P3D03-SC_37C	G2640_P3D03	2640	P3D03	P3_SC_37C	SC_37C	ACAACCTACCTGCTA	0.00240373	0.00185484	10	0.0839112	0.129876	-0.00239255	0.00479629	0.00408245	0.00176962	5	-0.00160056	0.0027331	5
G2640_P3D03-SC_37C	G2640_P3D03	2640	P3D03	P3_SC_37C	SC_37C	ACAAGTTTTACAGTT	-0.0523471	0.0075138	8	0.000100398	0.00048177	-0.0260819	-0.0262652	-0.0766128	0.0117777	3	-0.0482231	0.00485539	5
G2640_P3D03-SC_37C	G2640_P3D03	2640	P3D03	P3_SC_37C	SC_37C	ACAGGGCAGCTCCCG	-0.025319	0.00853459	8	0.15747	0.219919	-0.0397814	0.0144624	-0.0233188	0.00679952	3	-0.032884	0.0132234	5
G2640_P3D03-SC_37C	G2640_P3D03	2640	P3D03	P3_SC_37C	SC_37C	ACAGTTGACGGACAG	-0.00165968	0.00105929	10	0.144751	0.205022	-0.00517114	0.00351146	0.00100599	0.00141662	5	-0.00273508	0.000899778	5
G2640_P3D03-SC_37C	G2640_P3D03	2640	P3D03	P3_SC_37C	SC_37C	ACCACCGGTCCTGCC	-0.000414569	0.00390857	9	0.978758	0.983651	-0.000431459	1.68904e-05	0.000138981	0.00153141	4	-0.00881613	0.00596615	5
G2640_P3D03-SC_37C	G2640_P3D03	2640	P3D03	P3_SC_37C	SC_37C	AGAAGACGACGATGA	-0.0868547	0.0052079	10	2.26089e-09	1.84723e-07	-0.0663318	-0.0205229	-0.0934989	0.00245699	5	-0.0681161	0.00412619	5
G2640_P3D03-SC_37C	G2640_P3D03	2640	P3D03	P3_SC_37C	SC_37C	AGATTCATCCCATGG	-0.00268768	0.00441851	9	0.565211	0.638393	0.0346566	-0.0373442	0.00254929	0.00369858	5	-0.0150233	0.00567644	4
G2640_P3D03-SC_37C	G2640_P3D03	2640	P3D03	P3_SC_37C	SC_37C	AGTGTATGATAATAT	-0.020554	0.00225807	10	7.87241e-08	1.88953e-06	-0.0233157	0.00276172	-0.0259425	0.00167598	5	-0.0143906	0.00179243	5
G2640_P3D03-SC_37C	G2640_P3D03	2640	P3D03	P3_SC_37C	SC_37C	AGTGTTAATCAGACC	-0.0461427	0.021699	6	0.323394	0.401563	-0.0221393	-0.0240034	-0.0461899	0.00205231	2	-0.0335613	0.0335155	4
G2640_P3D03-SC_37C	G2640_P3D03	2640	P3D03	P3_SC_37C	SC_37C	AGTTTATAAAAAATT	0.00401135	0.000977902	6	0.0372316	0.0651458	0.0188846	-0.0148733	0.00405754	0.00273082	2	0.00400644	0.000890069	4
G2640_P3D03-SC_37C	G2640_P3D03	2640	P3D03	P3_SC_37C	SC_37C	ATAGAGCGGCGTTGA	-0.0259781	0.00286748	8	0.00261648	0.00700032	-0.0178801	-0.00809807	-0.0237498	0.00647714	3	-0.0264729	0.00305212	5
G2640_P3D03-SC_37C	G2640_P3D03	2640	P3D03	P3_SC_37C	SC_37C	ATAGTCGATTAAGAT	-0.0734345	0.00377787	3	0.0199167	0.0386452	-0.0361705	-0.037264	-0.077244	0.00269205	2	-0.0669555	0.00351074	1
G2640_P3D03-SC_37C	G2640_P3D03	2640	P3D03	P3_SC_37C	SC_37C	ATATTGAGTAAGTAC	-0.010238	0.00441439	8	0.0239945	0.0451646	-0.0106469	0.000408898	-0.019811	0.0101002	3	-0.00932866	0.00311297	5
G2640_P3D03-SC_37C	G2640_P3D03	2640	P3D03	P3_SC_37C	SC_37C	ATCGTTGGCATTTGG	-0.065926	0.0159734	4	0.138849	0.197854	-0.0437201	-0.0222059	-0.0662059	0.0210977	2	-0.0652443	0.0329294	2
G2640_P3D03-SC_37C	G2640_P3D03	2640	P3D03	P3_SC_37C	SC_37C	ATGGCGATGGTCTTG	-0.00883346	0.00574944	5	0.461974	0.540968	-0.007843	-0.000990467	-0.00876473	0.0146839	2	-0.00884551	0.00614679	3
G2640_P3D03-SC_37C	G2640_P3D03	2640	P3D03	P3_SC_37C	SC_37C	ATTATCAAGTGCCAG	-0.1268	0.0196987	10	0.00243621	0.00660403	-0.104003	-0.0227969	-0.123898	0.013739	5	-0.148839	0.0378644	5
G2640_P3D03-SC_37C	G2640_P3D03	2640	P3D03	P3_SC_37C	SC_37C	ATTATCATCGCCATC	-0.211195	0.0367485	4	0.0740924	0.11682	-0.127728	-0.0834674	-0.183709	0.0472983	2	-0.252751	0.0581576	2
G2640_P3D03-SC_37C	G2640_P3D03	2640	P3D03	P3_SC_37C	SC_37C	CAAGGATCCCCGTAG	-0.0250272	0.00370863	6	0.0173709	0.0345559	-0.0174624	-0.00756481	-0.0204001	0.00649891	3	-0.0265834	0.00376896	3
G2640_P3D03-SC_37C	G2640_P3D03	2640	P3D03	P3_SC_37C	SC_37C	CAAGTTCGGCGAAAT	0.00329978	0.00223887	8	0.0588367	0.0959456	-0.00943237	0.0127321	0.00462173	0.00132471	4	-0.00285644	0.0028587	4
G2640_P3D03-SC_37C	G2640_P3D03	2640	P3D03	P3_SC_37C	SC_37C	CAATCTTGAATTGAT	-0.00756485	0.00228471	9	0.154009	0.216021	-0.000313742	-0.00725111	-0.0052358	0.00340697	4	-0.00947892	0.00308857	5
G2640_P3D03-SC_37C	G2640_P3D03	2640	P3D03	P3_SC_37C	SC_37C	CAATTTCAACGTTGT	-0.0828508	0.0114527	7	0.00713023	0.0163605	-0.0701227	-0.0127281	-0.0833122	0.00688726	3	-0.0786767	0.0207153	4
G2640_P3D03-SC_37C	G2640_P3D03	2640	P3D03	P3_SC_37C	SC_37C	CATATGCATTCCTTG	-0.0033333	0.00275168	9	0.0275932	0.0507151	-0.00684678	0.00351348	-0.00972243	0.00515166	4	-0.00266599	0.00166491	5
G2640_P3D03-SC_37C	G2640_P3D03	2640	P3D03	P3_SC_37C	SC_37C	CATCAATGAGGCAGT	-0.151743	0.047235	5	0.135861	0.194174	-0.195177	0.0434336	-0.0411291	0.0233362	3	-0.197556	0.0150182	2
G2640_P3D03-SC_37C	G2640_P3D03	2640	P3D03	P3_SC_37C	SC_37C	CATTTATGGCTATCT	-0.113088	0.066	3	0.77134	0.818588	-0.0957317	-0.0173562	-0.0543569	0.144777	1	-0.142453	0.102373	2
G2640_P3D03-SC_37C	G2640_P3D03	2640	P3D03	P3_SC_37C	SC_37C	CCAACACAGGCTTCG	-0.0369382	0.00648804	10	5.65323e-07	8.14066e-06	-0.0257215	-0.0112167	-0.0610838	0.00571828	5	-0.0325358	0.00244168	5
G2640_P3D03-SC_37C	G2640_P3D03	2640	P3D03	P3_SC_37C	SC_37C	CCAAGACCGTGTAAA	-0.133025	0.0127106	3	0.0796602	0.124274	-0.233836	0.100812	-0.12406	0.0156501	2	-0.150875	0.0220835	1
G2640_P3D03-SC_37C	G2640_P3D03	2640	P3D03	P3_SC_37C	SC_37C	CCAGGATGTACCGCC	-0.0885044	0.0110508	5	0.0172982	0.0344521	-0.0966343	0.0081299	-0.0850338	0.00875943	2	-0.101648	0.0170462	3
G2640_P3D03-SC_37C	G2640_P3D03	2640	P3D03	P3_SC_37C	SC_37C	CCGTTAGTATCGCTA	0.00253784	0.00312004	5	0.90521	0.926669	-0.00985291	0.0123907	-0.000664579	0.0059304	2	0.00397185	0.00396844	3
G2640_P3D03-SC_37C	G2640_P3D03	2640	P3D03	P3_SC_37C	SC_37C	CGAATGCCATACAAA	-0.0102379	0.00898084	8	0.500917	0.57852	-0.0134127	0.0031748	-0.00999132	0.00175616	3	-0.0242638	0.013244	5
G2640_P3D03-SC_37C	G2640_P3D03	2640	P3D03	P3_SC_37C	SC_37C	CGATGATGATGATGA	-0.00303485	0.00109193	10	0.0178389	0.0353402	-0.00514166	0.00210682	-0.00358523	0.00140963	5	-0.00221318	0.00172234	5
G2640_P3D03-SC_37C	G2640_P3D03	2640	P3D03	P3_SC_37C	SC_37C	CGCGATCAATCCTCT	-0.0329447	0.00178905	8	2.90232e-05	0.000176862	-0.0589946	0.0260499	-0.0323928	0.00233198	3	-0.0336399	0.002617	5
G2640_P3D03-SC_37C	G2640_P3D03	2640	P3D03	P3_SC_37C	SC_37C	CTAAGCAGTCTTCTC	-0.164356	0.00576808	10	7.49818e-09	3.81244e-07	-0.147803	-0.016553	-0.175614	0.00776637	5	-0.156497	0.00648873	5
G2640_P3D03-SC_37C	G2640_P3D03	2640	P3D03	P3_SC_37C	SC_37C	CTAAGTGTGAAGGAG	-0.0457816	0.0206818	4	0.028987	0.0528715	-0.133364	0.0875828	-0.103695	0.0180882	1	-0.0264472	0.0104514	3
G2640_P3D03-SC_37C	G2640_P3D03	2640	P3D03	P3_SC_37C	SC_37C	CTACTTACAACGGAA	0.00637703	0.00284712	10	0.00259849	0.00696266	-0.000334256	0.00671128	0.0129714	0.00345297	5	0.00179934	0.00287693	5
G2640_P3D03-SC_37C	G2640_P3D03	2640	P3D03	P3_SC_37C	SC_37C	CTAGTTGTATAGCCA	-0.049442	0.00519602	4	0.0277862	0.0509844	-0.0337863	-0.0156557	-0.0495021	0.00144029	2	-0.0453224	0.011918	2
G2640_P3D03-SC_37C	G2640_P3D03	2640	P3D03	P3_SC_37C	SC_37C	CTATCAAGGCTTAAT	-0.0279205	0.00242578	5	0.0138899	0.0286184	-0.00951787	-0.0184026	-0.0301778	0.00593373	1	-0.0273377	0.00301486	4
G2640_P3D03-SC_37C	G2640_P3D03	2640	P3D03	P3_SC_37C	SC_37C	CTCGCTAATACTCCT	-0.00771087	0.00267909	10	0.129629	0.186637	-0.0144155	0.00670458	-0.00295392	0.00170692	5	-0.0162708	0.00228972	5
G2640_P3D03-SC_37C	G2640_P3D03	2640	P3D03	P3_SC_37C	SC_37C	CTCTTGAGAATACTT	-0.0846865	0.00555793	9	3.19977e-05	0.000191356	-0.100861	0.0161748	-0.0829069	0.0118424	4	-0.0850179	0.00511003	5
G2640_P3D03-SC_37C	G2640_P3D03	2640	P3D03	P3_SC_37C	SC_37C	CTGATTTGTGCTGTC	0.000807772	0.00191707	5	0.738347	0.790976	0.0084187	-0.00761092	-0.00109355	0.0034087	2	0.00181212	0.00247745	3
G2640_P3D03-SC_37C	G2640_P3D03	2640	P3D03	P3_SC_37C	SC_37C	CTTGATCAATCAAAA	-0.11325	0.0124038	10	3.03237e-05	0.000183015	-0.0987804	-0.0144693	-0.137928	0.0226547	5	-0.111986	0.00512705	5
G2640_P3D03-SC_37C	G2640_P3D03	2640	P3D03	P3_SC_37C	SC_37C	CTTGCAAGTGTAATT	0.00346329	0.0018441	9	0.343831	0.422647	-0.00269507	0.00615836	-0.0016993	0.00229224	4	0.00567428	0.0015001	5
G2640_P3D03-SC_37C	G2640_P3D03	2640	P3D03	P3_SC_37C	SC_37C	CTTTCTTGTGTATTT	-0.164639	0.0212101	5	0.0458027	0.0776277	-0.080249	-0.0843899	-0.178192	0.0540436	1	-0.161249	0.0270271	4
G2640_P3D03-SC_37C	G2640_P3D03	2640	P3D03	P3_SC_37C	SC_37C	GAACTCAGGTTCCAT	-0.0371656	0.00414788	7	0.000204741	0.000857296	-0.0336499	-0.00351574	-0.0440531	0.00409699	3	-0.0293267	0.00437081	4
G2640_P3D03-SC_37C	G2640_P3D03	2640	P3D03	P3_SC_37C	SC_37C	GAGAATGAAGGACAG	-0.0325251	0.00181688	10	1.01292e-06	1.25677e-05	-0.0393988	0.00687371	-0.0331475	0.00349466	5	-0.0324041	0.00154082	5
G2640_P3D03-SC_37C	G2640_P3D03	2640	P3D03	P3_SC_37C	SC_37C	GAGTGCTTCAAAGTT	0.00183307	0.00246849	8	0.0716636	0.113447	0.00639281	-0.00455974	0.00681659	0.00310791	3	-0.00174165	0.00263221	5
G2640_P3D03-SC_37C	G2640_P3D03	2640	P3D03	P3_SC_37C	SC_37C	GCCCTCGAAACCTAT	-0.0802196	0.006005	6	0.00234786	0.00641389	-0.0594649	-0.0207547	-0.079021	0.00846562	2	-0.0815084	0.00877823	4
G2640_P3D03-SC_37C	G2640_P3D03	2640	P3D03	P3_SC_37C	SC_37C	GCTAATTTCAAGAAT	-0.112521	0.0338166	4	0.426542	0.506766	-0.1467	0.034179	-0.076699	0.0774877	1	-0.124462	0.0447395	3
G2640_P3D03-SC_37C	G2640_P3D03	2640	P3D03	P3_SC_37C	SC_37C	GCTGCTTATGAGGAT	-0.000900546	0.00109192	10	0.999561	0.999642	-0.00893866	0.00803811	-6.50314e-07	0.00143559	5	-0.00204014	0.00161551	5
G2640_P3D03-SC_37C	G2640_P3D03	2640	P3D03	P3_SC_37C	SC_37C	GGTTGCCCAGAAGTA	-0.019979	0.00296446	10	0.000910488	0.00293529	-0.036133	0.0161541	-0.0211532	0.00306405	5	-0.0166232	0.00517982	5
G2640_P3D03-SC_37C	G2640_P3D03	2640	P3D03	P3_SC_37C	SC_37C	GTAATCTGACTCTAG	-0.145523	0.0248059	5	0.19043	0.258015	-0.0618965	-0.0836261	-0.0876309	0.0519968	1	-0.160002	0.0260039	4
G2640_P3D03-SC_37C	G2640_P3D03	2640	P3D03	P3_SC_37C	SC_37C	GTACAAGAAATTTTG	-0.0169746	0.00120528	5	0.00153517	0.00451029	-0.0137529	-0.00322177	-0.0138335	0.00171329	1	-0.0180672	0.00101041	4
G2640_P3D03-SC_37C	G2640_P3D03	2640	P3D03	P3_SC_37C	SC_37C	GTCACCGGCACTAAC	-0.00462686	0.00442397	5	0.518561	0.59575	-0.00534868	0.000721823	-0.00394213	0.00156253	2	-0.0129014	0.00543176	3
G2640_P3D03-SC_37C	G2640_P3D03	2640	P3D03	P3_SC_37C	SC_37C	GTGTGATTACTAAAT	-0.0763496	0.00777309	7	0.000479311	0.00173267	-0.0463609	-0.0299888	-0.0902342	0.0144197	3	-0.0727092	0.00738362	4
G2640_P3D03-SC_37C	G2640_P3D03	2640	P3D03	P3_SC_37C	SC_37C	GTTAAATCAACAGTT	-0.0219939	0.00153088	10	1.85033e-07	3.48216e-06	-0.0321192	0.0101253	-0.0173987	0.00174841	5	-0.0238165	0.00110112	5
G2640_P3D03-SC_37C	G2640_P3D03	2640	P3D03	P3_SC_37C	SC_37C	GTTCAGCTTTGATCG	-0.112982	0.00894132	8	4.44824e-05	0.00024893	-0.213555	0.100572	-0.111704	0.00243608	3	-0.134877	0.0100832	5
G2640_P3D03-SC_37C	G2640_P3D03	2640	P3D03	P3_SC_37C	SC_37C	GTTGAACTGGTTGTT	-0.0123418	0.00374482	7	0.00665154	0.0154126	-0.00922277	-0.00311904	-0.0192266	0.00543092	4	-0.010836	0.00253987	3
G2640_P3D03-SC_37C	G2640_P3D03	2640	P3D03	P3_SC_37C	SC_37C	GTTGGGCGCTTAAAG	0.00260483	0.00146682	9	0.116885	0.171077	-0.000664285	0.00326912	0.00361593	0.00263111	4	0.00215924	0.00174667	5
G2640_P3D03-SC_37C	G2640_P3D03	2640	P3D03	P3_SC_37C	SC_37C	GTTTAGCTTCCGTTG	-0.103386	0.0179187	9	0.00670388	0.0155223	-0.0426792	-0.0607067	-0.108254	0.0230803	4	-0.0959175	0.0285883	5
G2640_P3D03-SC_37C	G2640_P3D03	2640	P3D03	P3_SC_37C	SC_37C	GTTTGTTTTGGGAAA	-0.14237	0.0080816	8	7.71973e-06	6.16045e-05	-0.082592	-0.0597783	-0.158977	0.011125	3	-0.132009	0.00878763	5
G2640_P3D03-SC_37C	G2640_P3D03	2640	P3D03	P3_SC_37C	SC_37C	TAACCTCGCGCTGAG	0.00172954	0.0019586	9	0.163479	0.226903	0.00308065	-0.00135111	-0.00335729	0.00309381	4	0.00292426	0.00149935	5
G2640_P3D03-SC_37C	G2640_P3D03	2640	P3D03	P3_SC_37C	SC_37C	TAATATTGTTTTGCG	-0.11559	0.052355	5	0.0501332	0.0838606	-0.109047	-0.0065436	-0.114982	0.00252034	2	-0.240705	0.0361556	3
G2640_P3D03-SC_37C	G2640_P3D03	2640	P3D03	P3_SC_37C	SC_37C	TAGACGGACATCTTC	-0.014186	0.0144211	7	0.518554	0.59575	0.000336127	-0.0145221	-0.0138651	0.00512884	4	-0.0298115	0.0357913	3
G2640_P3D03-SC_37C	G2640_P3D03	2640	P3D03	P3_SC_37C	SC_37C	TATATTGAACTTTAC	0.000356081	0.00136765	9	0.309092	0.38701	0.0042387	-0.00388262	-0.00159211	0.00159084	4	0.00259811	0.0017066	5
G2640_P3D03-SC_37C	G2640_P3D03	2640	P3D03	P3_SC_37C	SC_37C	TATGCCCTTCTTCTG	-0.017201	0.00217603	10	0.0004831	0.00174384	-0.0127424	-0.00445855	-0.0161701	0.00213991	5	-0.0203215	0.00372306	5
G2640_P3D03-SC_37C	G2640_P3D03	2640	P3D03	P3_SC_37C	SC_37C	TCAAAACGGAGTGTT	-0.000292049	0.00219088	10	0.034394	0.0609021	-0.00216713	0.00187508	-0.00600691	0.00345116	5	0.000314878	0.00112468	5
G2640_P3D03-SC_37C	G2640_P3D03	2640	P3D03	P3_SC_37C	SC_37C	TCAAAGCATGAAAAA	-0.0599112	0.00703917	9	0.00012983	0.000591331	-0.0702694	0.0103582	-0.055623	0.00506655	5	-0.0795901	0.0108536	4
G2640_P3D03-SC_37C	G2640_P3D03	2640	P3D03	P3_SC_37C	SC_37C	TCAAATGATGAGGAT	-0.0754949	0.0064427	9	0.000130485	0.000593231	-0.0161742	-0.0593207	-0.0767767	0.0066584	4	-0.0720475	0.0109198	5
G2640_P3D03-SC_37C	G2640_P3D03	2640	P3D03	P3_SC_37C	SC_37C	TCAACAACCTATGCA	-0.0124395	0.00369751	9	0.7297	0.783745	0.00126751	-0.0137071	0.00086395	0.00325923	4	-0.0164276	0.00178448	5
G2640_P3D03-SC_37C	G2640_P3D03	2640	P3D03	P3_SC_37C	SC_37C	TCATAGGTATCTCGC	-0.0011224	0.000925385	10	0.00712812	0.0163587	-0.0034091	0.0022867	-0.00254451	0.00142039	5	-0.000395664	0.00101537	5
G2640_P3D03-SC_37C	G2640_P3D03	2640	P3D03	P3_SC_37C	SC_37C	TCGAAAGCACAGTAG	-0.0955038	0.0042039	5	0.000496843	0.00178465	-0.151621	0.0561169	-0.108455	0.00673383	1	-0.092184	0.00340928	4
G2640_P3D03-SC_37C	G2640_P3D03	2640	P3D03	P3_SC_37C	SC_37C	TCGATAGAATTTACT	-0.0518213	0.00254553	10	8.4247e-09	4.15416e-07	-0.0528411	0.00101978	-0.0587292	0.00297361	5	-0.048102	0.00218195	5
G2640_P3D03-SC_37C	G2640_P3D03	2640	P3D03	P3_SC_37C	SC_37C	TCTTGGAGGTGAATG	-0.0334957	0.0023871	10	2.74721e-06	2.7053e-05	-0.0609332	0.0274375	-0.0367464	0.00378299	5	-0.0317358	0.00278346	5
G2640_P3D03-SC_37C	G2640_P3D03	2640	P3D03	P3_SC_37C	SC_37C	TGATCATCACGGGAC	-0.100913	0.00679722	10	3.25071e-06	3.103e-05	-0.0368104	-0.0641028	-0.108641	0.0103519	5	-0.0953037	0.00881963	5
G2640_P3D03-SC_37C	G2640_P3D03	2640	P3D03	P3_SC_37C	SC_37C	TGGAGTCTTTGTTGA	-0.0495231	0.00260717	10	1.14037e-06	1.37651e-05	-0.0760209	0.0264978	-0.0463674	0.00429994	5	-0.0510367	0.00297804	5
G2640_P3D03-SC_37C	G2640_P3D03	2640	P3D03	P3_SC_37C	SC_37C	TTAATTAGAGGTATG	-0.0177962	0.00478771	6	0.106185	0.157845	-0.0165451	-0.00125109	-0.0190158	0.0113104	2	-0.0174593	0.00594504	4
G2640_P3D03-SC_37C	G2640_P3D03	2640	P3D03	P3_SC_37C	SC_37C	TTAATTGCACTTATG	-0.0491988	0.0186214	3	0.536531	0.612048	-0.0441327	-0.0050661	-0.014389	0.0161863	1	-0.0665953	0.0114427	2
G2640_P3D03-SC_37C	G2640_P3D03	2640	P3D03	P3_SC_37C	SC_37C	TTAGTCTTTCCATCA	-0.215595	0.0235952	10	0.000100432	0.00048177	-0.183045	-0.0325499	-0.206015	0.0155767	5	-0.272293	0.0378932	5
G2640_P3D03-SC_37C	G2640_P3D03	2640	P3D03	P3_SC_37C	SC_37C	TTATATTTATTTGCT	-0.00350172	0.000989431	10	0.0169686	0.0339127	-0.0132206	0.0097189	-0.00306264	0.00136821	5	-0.00402905	0.00149942	5
G2640_P3D03-SC_37C	G2640_P3D03	2640	P3D03	P3_SC_37C	SC_37C	TTTAACTCACCGTAA	-0.0202523	0.0123898	9	0.303909	0.381902	-0.0184056	-0.0018467	-0.0196973	0.00340019	4	-0.0411773	0.0208776	5
G2640_P3D03-SC_37C	G2640_P3D03	2640	P3D03	P3_SC_37C	SC_37C	TTTATAAATCAATAG	-0.000946334	0.00119731	10	0.0546475	0.0900455	-0.000226545	-0.000719789	0.00192772	0.00148807	5	-0.00262892	0.00113858	5
G2640_P3D03-SC_37C	G2640_P3D03	2640	P3D03	P3_SC_37C	SC_37C	TTTTGCATTTAGGCG	-0.0295181	0.00378075	8	4.71353e-05	0.000260499	-0.00776484	-0.0217532	-0.0419947	0.00616132	3	-0.0280596	0.0021066	5
G2640_P3D03-SC_37C	G2640_P3D03	2640	P3D03	P3_SC_37C	SC_37C	ATAATTTTCATCCAC	-0.0842631	0.0133458	3	0.0240953	0.0453201	-0.104223	0.0199601				-0.0842631	0.0133458	3
G2640_P3D03-SC_37C	G2640_P3D03	2640	P3D03	P3_SC_37C	SC_37C	ATTAATACTTTGCAG	-0.110853	0.0440132	3	0.128018	0.184721	-0.105046	-0.00580736				-0.110853	0.0440132	3
G2640_P3D03-SC_37C	G2640_P3D03	2640	P3D03	P3_SC_37C	SC_37C	CATTGTCGGACGCTT	-0.0207254	0.00176471	3	0.00571548	0.0135486						-0.0207254	0.00176471	3
G2640_P3D03-SC_37C	G2640_P3D03	2640	P3D03	P3_SC_37C	SC_37C	CGAACAGAAACACAA	-0.0642881	0.0209457	3	0.091658	0.13977	-0.0491679	-0.0151203				-0.0642881	0.0209457	3
G2640_P3D03-SC_37C	G2640_P3D03	2640	P3D03	P3_SC_37C	SC_37C	GGTGGAAGTAGCAGT	-0.00706968	0.00370351	3	0.189779	0.257385	-0.00624002	-0.000829657				-0.00706968	0.00370351	3
G70_P1C04-SC_37C	G70_P1C04	70	P1C04	P1_SC_37C	SC_37C	AAAACATTATCAAAG	-0.00198554	0.0043492	10	0.650806	0.71668	-0.000652642	-0.0013329	-0.00264802	0.00297269	5	0.0031246	0.00825618	5
G70_P1C04-SC_37C	G70_P1C04	70	P1C04	P1_SC_37C	SC_37C	AAAAGAAAAATGTAT	0.0309103	0.00334494	10	3.31398e-05	0.000196863	0.0418506	-0.0109403	0.0320108	0.00288257	5	0.0262864	0.00590857	5
G70_P1C04-SC_37C	G70_P1C04	70	P1C04	P1_SC_37C	SC_37C	AAAAGCGACATTTCT	-0.0622933	0.0159154	10	0.00321925	0.00835113	-0.0616103	-0.000683003	-0.0667122	0.00662165	5	-0.0132005	0.0220706	5
G70_P1C04-SC_37C	G70_P1C04	70	P1C04	P1_SC_37C	SC_37C	ACAACCTACCTGCTA	0.00325198	0.00331607	10	0.47926	0.557436	-0.00161883	0.00487082	0.00304583	0.00224476	5	0.00497878	0.00649675	5
G70_P1C04-SC_37C	G70_P1C04	70	P1C04	P1_SC_37C	SC_37C	ACAAGTTTTACAGTT	0.0359818	0.0280266	10	0.274324	0.350596	0.021037	0.0149448	0.0361914	0.00223144	5	-0.044456	0.0437112	5
G70_P1C04-SC_37C	G70_P1C04	70	P1C04	P1_SC_37C	SC_37C	ACAGGGCAGCTCCCG	-0.0390617	0.00745682	10	0.00731358	0.0167319	-0.0292694	-0.00979226	-0.0383625	0.00607487	5	-0.042999	0.0144165	5
G70_P1C04-SC_37C	G70_P1C04	70	P1C04	P1_SC_37C	SC_37C	ACAGTTGACGGACAG	0.000259277	0.00464324	10	0.820125	0.859813	0.00149213	-0.00123285	0.0012944	0.00274391	5	-0.00891244	0.00816769	5
G70_P1C04-SC_37C	G70_P1C04	70	P1C04	P1_SC_37C	SC_37C	ACCACCGGTCCTGCC	-0.00661281	0.0107377	9	0.730161	0.784105	-0.00133408	-0.00527873	-0.0022156	0.00339315	5	-0.0473293	0.0103252	4
G70_P1C04-SC_37C	G70_P1C04	70	P1C04	P1_SC_37C	SC_37C	AGAAGACGACGATGA	-0.0224072	0.0365032	10	8.35357e-11	2.26218e-08	-0.0269064	0.00449916	-0.0926359	0.00276027	5	0.115276	0.00386486	5
G70_P1C04-SC_37C	G70_P1C04	70	P1C04	P1_SC_37C	SC_37C	AGATTCATCCCATGG	0.000821547	0.00869025	9	0.62133	0.690508	-0.00105522	0.00187677	-0.00510272	0.00593652	4	0.0223856	0.0113261	5
G70_P1C04-SC_37C	G70_P1C04	70	P1C04	P1_SC_37C	SC_37C	AGTGTATGATAATAT	0.00608733	0.0139777	10	0.417117	0.496989	-0.01028	0.0163673	0.00695671	0.0015184	5	-0.0480144	0.011978	5
G70_P1C04-SC_37C	G70_P1C04	70	P1C04	P1_SC_37C	SC_37C	AGTGTTAATCAGACC	-0.0179875	0.0111624	7	0.312223	0.390146	-0.0454435	0.027456	-0.017861	0.00530813	4	-0.0215858	0.028307	3
G70_P1C04-SC_37C	G70_P1C04	70	P1C04	P1_SC_37C	SC_37C	AGTTTATAAAAAATT	0.0642734	0.00384938	9	1.96563e-06	2.09102e-05	0.0647237	-0.000450304	0.0652975	0.00347418	5	0.059555	0.00745725	4
G70_P1C04-SC_37C	G70_P1C04	70	P1C04	P1_SC_37C	SC_37C	ATAATTTTCATCCAC	-0.000350946	0.0195664	6	0.732411	0.786191	-0.0111715	0.0108205	-0.00771591	0.0113114	3	0.0440326	0.0277678	3
G70_P1C04-SC_37C	G70_P1C04	70	P1C04	P1_SC_37C	SC_37C	ATAGAGCGGCGTTGA	-0.0226511	0.0111503	10	0.185928	0.252906	-0.011058	-0.0115931	-0.0232935	0.00561236	5	-0.012446	0.0223688	5
G70_P1C04-SC_37C	G70_P1C04	70	P1C04	P1_SC_37C	SC_37C	ATAGTCGATTAAGAT	-0.0323373	0.0382734	7	0.0735165	0.116056	-0.0514128	0.0190756	-0.0804608	0.0255275	3	0.061728	0.0356897	4
G70_P1C04-SC_37C	G70_P1C04	70	P1C04	P1_SC_37C	SC_37C	ATATTGAGTAAGTAC	0.00259547	0.00546004	10	0.399635	0.479462	0.00108997	0.0015055	0.00647652	0.00681256	5	-0.0035211	0.00855244	5
G70_P1C04-SC_37C	G70_P1C04	70	P1C04	P1_SC_37C	SC_37C	ATCGTTGGCATTTGG	-0.126713	0.0303051	5	0.0138595	0.0285793	-0.105906	-0.0208074	-0.126713	0.0303051	5
G70_P1C04-SC_37C	G70_P1C04	70	P1C04	P1_SC_37C	SC_37C	ATGGCGATGGTCTTG	0.00429833	0.0111744	7	0.0308723	0.0557034	-0.00278687	0.00708521	-0.0242162	0.00884988	3	0.0247493	0.00749483	4
G70_P1C04-SC_37C	G70_P1C04	70	P1C04	P1_SC_37C	SC_37C	ATTAATACTTTGCAG	-0.142195	0.102301	4	0.229413	0.30171	-0.0590057	-0.0831888	-0.166039	0.0440379	2	0.0660025	0.130127	2
G70_P1C04-SC_37C	G70_P1C04	70	P1C04	P1_SC_37C	SC_37C	ATTATCAAGTGCCAG	-0.0801136	0.0195995	10	0.0200162	0.0388201	-0.0673298	-0.0127838	-0.0785558	0.00842106	5	-0.111183	0.0376073	5
G70_P1C04-SC_37C	G70_P1C04	70	P1C04	P1_SC_37C	SC_37C	ATTATCATCGCCATC	-0.0898356	0.0200232	7	0.0189185	0.0370313	-0.0768754	-0.0129602	-0.0920073	0.0130044	4	-0.0629317	0.0457728	3
G70_P1C04-SC_37C	G70_P1C04	70	P1C04	P1_SC_37C	SC_37C	CAAGGATCCCCGTAG	-0.0201887	0.0122435	8	0.255558	0.330408	-0.0256483	0.00545958	-0.0197671	0.00548572	5	-0.0363619	0.0339754	3
G70_P1C04-SC_37C	G70_P1C04	70	P1C04	P1_SC_37C	SC_37C	CAAGTTCGGCGAAAT	-0.012368	0.0152187	8	0.646241	0.712535	-0.00314285	-0.00922511	-0.0110001	0.011767	4	-0.0213837	0.0302096	4
G70_P1C04-SC_37C	G70_P1C04	70	P1C04	P1_SC_37C	SC_37C	CAATCTTGAATTGAT	0.0126643	0.00519007	10	0.0821287	0.127534	0.0141933	-0.00152902	0.011748	0.00243201	5	0.0246764	0.00880557	5
G70_P1C04-SC_37C	G70_P1C04	70	P1C04	P1_SC_37C	SC_37C	CAATTTCAACGTTGT	-0.0692042	0.0125199	10	0.00154474	0.00453413	-0.0641989	-0.00500536	-0.0731076	0.00775038	5	-0.0407594	0.020922	5
G70_P1C04-SC_37C	G70_P1C04	70	P1C04	P1_SC_37C	SC_37C	CATATGCATTCCTTG	-0.0108863	0.0240083	9	0.703806	0.762375	-0.00930645	-0.00157987	-0.0106382	0.00287259	5	-0.0741666	0.0458747	4
G70_P1C04-SC_37C	G70_P1C04	70	P1C04	P1_SC_37C	SC_37C	CATTGTCGGACGCTT	0.0931574	0.0291138	3	0.0459195	0.0777516	0.0853687	0.00778877	0.0671463	0.00502939	2	0.1537	0.00767301	1
G70_P1C04-SC_37C	G70_P1C04	70	P1C04	P1_SC_37C	SC_37C	CATTTATGGCTATCT	-0.0939563	0.0119163	9	0.000168003	0.00072844	-0.0900852	-0.00387107	-0.106202	0.0137526	5	-0.073037	0.0179746	4
G70_P1C04-SC_37C	G70_P1C04	70	P1C04	P1_SC_37C	SC_37C	CCAACACAGGCTTCG	4.54833e-05	0.0071034	10	0.735086	0.788284	0.00488293	-0.00483744	-0.0027089	0.00410149	5	0.0190821	0.0107826	5
G70_P1C04-SC_37C	G70_P1C04	70	P1C04	P1_SC_37C	SC_37C	CCAAGACCGTGTAAA	-0.172596	0.0631971	3	0.111952	0.164981	-0.232802	0.0602063	-0.172596	0.0631971	3
G70_P1C04-SC_37C	G70_P1C04	70	P1C04	P1_SC_37C	SC_37C	CCAGGATGTACCGCC	-0.0913338	0.0293538	7	0.0172993	0.0344521	-0.104767	0.0134327	-0.126143	0.027706	3	-0.0344997	0.035402	4
G70_P1C04-SC_37C	G70_P1C04	70	P1C04	P1_SC_37C	SC_37C	CCGTTAGTATCGCTA	-0.0182158	0.0116276	8	0.394587	0.474319	-0.019524	0.00130811	-0.0185516	0.00847472	3	-0.0165362	0.0189543	5
G70_P1C04-SC_37C	G70_P1C04	70	P1C04	P1_SC_37C	SC_37C	CGAATGCCATACAAA	-0.0147068	0.0179748	9	0.53334	0.609134	-0.0187919	0.0040851	-0.0142411	0.00265625	4	-0.0589529	0.0258892	5
G70_P1C04-SC_37C	G70_P1C04	70	P1C04	P1_SC_37C	SC_37C	CGATGATGATGATGA	-0.00729985	0.00342666	10	0.131571	0.189019	-0.00559316	-0.00170669	-0.00730191	0.00203942	5	-0.00727645	0.00687016	5
G70_P1C04-SC_37C	G70_P1C04	70	P1C04	P1_SC_37C	SC_37C	CGCGATCAATCCTCT	-0.0275011	0.0183119	8	0.0653771	0.104706	-0.0319146	0.00441352	-0.0293165	0.00463753	5	0.039543	0.0281828	3
G70_P1C04-SC_37C	G70_P1C04	70	P1C04	P1_SC_37C	SC_37C	CTAAGCAGTCTTCTC	-0.11008	0.01253	10	1.41111e-08	5.75555e-07	-0.133331	0.0232508	-0.153538	0.00824708	5	-0.0873409	0.00596551	5
G70_P1C04-SC_37C	G70_P1C04	70	P1C04	P1_SC_37C	SC_37C	CTAAGTGTGAAGGAG	-0.107935	0.0284239	7	0.0219041	0.0419011	-0.131283	0.0233487	-0.11786	0.036204	5	-0.0849036	0.0551487	2
G70_P1C04-SC_37C	G70_P1C04	70	P1C04	P1_SC_37C	SC_37C	CTACTTACAACGGAA	-0.00809531	0.00744811	10	0.355244	0.433978	2.16745e-05	-0.00811699	-0.0089762	0.00303937	5	0.00827776	0.0131035	5
G70_P1C04-SC_37C	G70_P1C04	70	P1C04	P1_SC_37C	SC_37C	CTAGTTGTATAGCCA	-0.0311257	0.00956026	6	0.0598172	0.0972264	-0.0228617	-0.00826406	-0.0273017	0.0105693	5	-0.0503493	0.0236974	1
G70_P1C04-SC_37C	G70_P1C04	70	P1C04	P1_SC_37C	SC_37C	CTATCAAGGCTTAAT	0.0128777	0.00516697	9	0.299494	0.377153	0.0109081	0.00196958	0.00688437	0.00542041	4	0.0226849	0.00693379	5
G70_P1C04-SC_37C	G70_P1C04	70	P1C04	P1_SC_37C	SC_37C	CTCGCTAATACTCCT	-0.0313533	0.00723475	10	0.0172928	0.0344501	-0.0375804	0.00622705	-0.0312669	0.00261508	5	-0.0342	0.0150063	5
G70_P1C04-SC_37C	G70_P1C04	70	P1C04	P1_SC_37C	SC_37C	CTCTTGAGAATACTT	-0.0525966	0.0188678	10	0.000289878	0.00114164	-0.0948968	0.0423002	-0.100368	0.0170399	5	-0.00901946	0.0162748	5
G70_P1C04-SC_37C	G70_P1C04	70	P1C04	P1_SC_37C	SC_37C	CTGATTTGTGCTGTC	0.0402631	0.00386933	8	0.000230463	0.000940346	0.0375917	0.00267136	0.040096	0.00212918	4	0.0425322	0.00784677	4
G70_P1C04-SC_37C	G70_P1C04	70	P1C04	P1_SC_37C	SC_37C	CTTGATCAATCAAAA	-0.0435926	0.0228534	10	3.57014e-09	2.34104e-07	-0.0824445	0.0388519	-0.121173	0.00555198	5	0.0126535	0.00472735	5
G70_P1C04-SC_37C	G70_P1C04	70	P1C04	P1_SC_37C	SC_37C	CTTGCAAGTGTAATT	0.00224366	0.00332186	10	0.751126	0.801315	0.000560442	0.00168322	0.00092469	0.00198192	5	0.0108039	0.00504909	5
G70_P1C04-SC_37C	G70_P1C04	70	P1C04	P1_SC_37C	SC_37C	GAACTCAGGTTCCAT	-0.0420887	0.0109531	9	0.0291222	0.0530451	-0.0442945	0.00220574	-0.044917	0.00873975	4	-0.0293297	0.0185631	5
G70_P1C04-SC_37C	G70_P1C04	70	P1C04	P1_SC_37C	SC_37C	GAGAATGAAGGACAG	0.0111841	0.0164942	10	0.384948	0.464895	0.00446468	0.00671939	0.0117267	0.00175155	5	-0.0482646	0.0183332	5
G70_P1C04-SC_37C	G70_P1C04	70	P1C04	P1_SC_37C	SC_37C	GAGTGCTTCAAAGTT	0.0188495	0.00574531	10	0.0387874	0.0674447	0.0186933	0.000156155	0.0182736	0.00261852	5	0.028615	0.0107832	5
G70_P1C04-SC_37C	G70_P1C04	70	P1C04	P1_SC_37C	SC_37C	GCAAGAAAGAAACCC	-0.0345006	0.0155535	6	0.186834	0.253943	-0.0257965	-0.00870415	-0.0316638	0.00858693	3	-0.0626645	0.0270564	3
G70_P1C04-SC_37C	G70_P1C04	70	P1C04	P1_SC_37C	SC_37C	GCCCTCGAAACCTAT	-0.0656564	0.0155843	9	0.0156052	0.0316139	-0.0598668	-0.00578955	-0.0589638	0.0121439	5	-0.10083	0.0278398	4
G70_P1C04-SC_37C	G70_P1C04	70	P1C04	P1_SC_37C	SC_37C	GCTAATTTCAAGAAT	-0.0476524	0.0232896	7	0.134077	0.191965	-0.0633115	0.0156592	-0.0804203	0.0578682	2	-0.0408971	0.0262747	5
G70_P1C04-SC_37C	G70_P1C04	70	P1C04	P1_SC_37C	SC_37C	GCTGCTTATGAGGAT	-0.00428998	0.00468941	10	0.479166	0.557379	-0.0056472	0.00135722	-0.00461631	0.00233556	5	0.00082252	0.00924452	5
G70_P1C04-SC_37C	G70_P1C04	70	P1C04	P1_SC_37C	SC_37C	GGTGGAAGTAGCAGT	0.00174098	0.0191058	7	0.578169	0.650287	0.00243518	-0.0006942	-0.00777005	0.00830412	4	0.0634137	0.0211459	3
G70_P1C04-SC_37C	G70_P1C04	70	P1C04	P1_SC_37C	SC_37C	GGTTGCCCAGAAGTA	-0.048799	0.0190284	10	0.00306406	0.0080086	-0.0194968	-0.0293022	-0.0558218	0.00578283	5	0.0217966	0.0183348	5
G70_P1C04-SC_37C	G70_P1C04	70	P1C04	P1_SC_37C	SC_37C	GTAATCTGACTCTAG	-0.0121698	0.0159844	10	0.509062	0.586188	0.0077402	-0.01991	-0.014498	0.00780565	5	0.0196534	0.0288585	5
G70_P1C04-SC_37C	G70_P1C04	70	P1C04	P1_SC_37C	SC_37C	GTACAAGAAATTTTG	-0.0144897	0.0129649	9	0.00837588	0.0188369	-0.0434344	0.0289446	-0.0454116	0.0142581	5	0.00556889	0.0114836	4
G70_P1C04-SC_37C	G70_P1C04	70	P1C04	P1_SC_37C	SC_37C	GTCACCGGCACTAAC	-0.0285508	0.0114285	8	0.0976521	0.147342	-0.0259069	-0.00264389	-0.0268451	0.00763599	5	-0.0508111	0.0275854	3
G70_P1C04-SC_37C	G70_P1C04	70	P1C04	P1_SC_37C	SC_37C	GTGTGATTACTAAAT	-0.0211271	0.0128046	10	0.18577	0.252745	-0.0108598	-0.0102673	-0.0231224	0.00579936	5	0.00795698	0.0221411	5
G70_P1C04-SC_37C	G70_P1C04	70	P1C04	P1_SC_37C	SC_37C	GTTAAATCAACAGTT	-0.0161399	0.00637157	10	7.9867e-06	6.33649e-05	-0.0412742	0.0251342	-0.033278	0.00421094	5	0.000881632	0.0041966	5
G70_P1C04-SC_37C	G70_P1C04	70	P1C04	P1_SC_37C	SC_37C	GTTCAGCTTTGATCG	-0.0891867	0.013629	9	2.46871e-06	2.4901e-05	-0.124119	0.0349322	-0.108017	0.00575536	4	-0.0444627	0.0088697	5
G70_P1C04-SC_37C	G70_P1C04	70	P1C04	P1_SC_37C	SC_37C	GTTGAACTGGTTGTT	-0.0311676	0.0112585	10	0.111887	0.164925	-0.0331275	0.00195993	-0.0285643	0.00936175	5	-0.0441592	0.0209136	5
G70_P1C04-SC_37C	G70_P1C04	70	P1C04	P1_SC_37C	SC_37C	GTTGGGCGCTTAAAG	-0.00342344	0.0037643	10	0.527556	0.603856	-0.00339134	-3.20955e-05	-0.00316763	0.00207406	5	-0.00670986	0.00743412	5
G70_P1C04-SC_37C	G70_P1C04	70	P1C04	P1_SC_37C	SC_37C	GTTTAGCTTCCGTTG	-0.00513582	0.0128289	10	0.176885	0.242458	0.000432998	-0.00556882	-0.0108695	0.00355211	5	0.0442455	0.0104244	5
G70_P1C04-SC_37C	G70_P1C04	70	P1C04	P1_SC_37C	SC_37C	GTTTGTTTTGGGAAA	-0.124302	0.0148048	8	7.3106e-05	0.000375229	-0.140287	0.0159851	-0.143481	0.00974834	3	-0.0869876	0.0135977	5
G70_P1C04-SC_37C	G70_P1C04	70	P1C04	P1_SC_37C	SC_37C	TAACCTCGCGCTGAG	0.0276044	0.00870713	10	0.00490303	0.0119128	0.0247705	0.00283393	0.0282585	0.00162251	5	-0.00192998	0.0109029	5
G70_P1C04-SC_37C	G70_P1C04	70	P1C04	P1_SC_37C	SC_37C	TAATATTGTTTTGCG	-0.105223	0.0212889	8	0.00513645	0.0123618	-0.0703753	-0.0348478	-0.120893	0.032345	5	-0.0977815	0.02229	3
G70_P1C04-SC_37C	G70_P1C04	70	P1C04	P1_SC_37C	SC_37C	TAGACGGACATCTTC	0.0176112	0.00897323	9	0.157476	0.219919	0.0214085	-0.00379729	0.0179685	0.00288506	5	0.00144248	0.0194094	4
G70_P1C04-SC_37C	G70_P1C04	70	P1C04	P1_SC_37C	SC_37C	TATATTGAACTTTAC	0.0103043	0.00474139	10	0.0950516	0.144005	0.0115448	-0.00124054	0.00887427	0.00239547	5	0.0232108	0.00719647	5
G70_P1C04-SC_37C	G70_P1C04	70	P1C04	P1_SC_37C	SC_37C	TATGCCCTTCTTCTG	0.00222988	0.00942489	10	0.680617	0.742486	0.00616433	-0.00393446	0.00353437	0.00244874	5	-0.0292195	0.0120234	5
[truncated: 10,458 more rows]

## Sheet: BYxRM_x
Sample	Fitness	Fitness_std
LK1-A02	0.0745689	0.00188579
LK1-A05	0.0718129	0.0025141
LK1-A06	0.0317659	0.0013855
LK1-A09	-0.063298	0.00144175
LK1-B01	0.00798559	0.00139281
LK1-B03	-0.0612804	0.00198765
LK1-B04	-0.0942509	0.00204975
LK1-B05	-0.0510149	0.0036071
LK1-B08	-0.0923338	0.00182344
LK1-C06	0.0780835	0.00237346
LK1-C07	0.00115568	0.000821961
LK1-C09	0.0978348	0.00284261
LK1-C11	0.0376326	0.00211941
LK1-D02	-0.0397523	0.00110199
LK1-D06	-0.0606053	0.00238171
LK1-D08	-0.00849126	0.00272031
LK1-D10	-0.0379864	0.000620934
LK1-D12	-0.0574038	0.00191313
LK1-E01	-0.0434672	0.00241107
LK1-E04	0.0106541	0.0222657
LK1-E09	0.00130607	0.0179802
LK1-F05	0.0465091	0.00498245
LK1-G03	0.0440681	0.00100077
LK1-G08	-0.0765692	0.00382591
LK1-G09	-0.110538	0.000852454
LK1-G11	0.0262133	0.00226888
LK1-G12	-0.0666834	0.0020499
LK1-H04	-0.0708143	0.00154962
LK2-A01	-0.0033794	0.00082545
LK2-A05	-0.076503	0.0013285
LK2-A06	-0.0873603	0.00152823
LK2-A07	0.00562313	0.000987488
LK2-A10	-0.0698101	0.001116
LK2-A11	-0.127012	0.00540905
LK2-A12	-0.0296117	0.000725333
LK2-B04	0.0685537	0.00191986
LK2-B05	0.0382365	0.00169424
LK2-B07	-0.00378999	0.00213472
LK2-C05	-0.0729515	0.00138996
LK2-C09	-0.0291811	0.00120551
LK2-D05	-0.0409899	0.000544406
LK2-D07	-0.00914778	0.00292715
LK2-D09	-0.0465031	0.00207323
LK2-E07	0.0210672	0.000836698
LK2-E08	-0.011859	0.00143461
LK2-E12	-0.00321105	0.00197205
LK2-F04	0.0644069	0.00325989
LK2-F07	-0.0129791	0.00265561
LK2-F11	0.0353492	0.00155606
LK2-G07	-0.0191946	0.00397243
LK2-G10	-0.00548731	0.00177171
LK3-A01	0.0199233	0.00027069
LK3-A05	-0.0332882	0.00122415
LK3-A07	-0.0082879	0.00131986
LK3-B02	-0.0619369	0.000443142
LK3-B03	0.0204323	0.000937275
LK3-B08	0.00160183	0.000827876
LK3-B10	0.0605673	0.0028171
LK3-B11	-0.0308857	0.0010285
LK3-B12	-0.0697899	0.000882316
LK3-C04	-0.0213241	0.00237026
LK3-C06	0.0109543	0.00428704
LK3-C08	0.0800391	0.000894903
LK3-C09	-0.00321079	0.00414785
LK3-C11	-0.0243026	0.000576726
LK3-C12	0.00451858	0.00131181
LK3-D01	0.0661846	0.00210737
LK3-D04	-0.0588958	0.00210121
LK3-D05	-0.0974164	0.00520739
LK3-D08	0.0236245	0.00106673
LK3-D09	-0.0774375	0.00123337
LK3-E06	0.0327449	0.00132428
LK3-F06	-0.125232	0.00331674
LK3-F10	0.0313247	0.00410968
LK3-G01	0.00112576	0.00134742
LK3-G02	-0.0212507	0.00126788
LK3-G08	0.0938057	0.0019477
LK3-G10	-0.0501166	0.00206237
LK3-G11	-0.0412896	0.00152564
LK3-H03	-0.0491182	0.000897888
LK3-H05	0.0170186	0.00307414
LK3-H06	0.0101268	0.00251009
LK3-H08	-0.0662593	0.000813023
LK3-H10	0.00413202	0.0028538
LK3-H11	-0.0376475	0.00289482
LK4-A04	0.036559	0.00185718
LK4-A12	0.0449402	0.00090309
LK4-B01	-0.0609808	0.00109883
LK4-B03	-0.037788	0.000701805
LK4-B05	-0.0551455	0.00248993
LK4-B06	-0.00738952	0.00212292
LK4-B07	0.0516679	0.000991282
LK4-B08	-0.0639094	0.000627339
LK4-B12	-0.0226924	0.00108865
LK4-C08	-0.0247301	0.000446369
LK4-C09	-0.0877993	0.00250341
LK4-C10	-0.0451711	0.000936399
LK4-D01	0.0110726	0.000793625
LK4-D02	-0.0265553	0.00113807
LK4-D11	-0.0608295	0.00117304
LK4-E01	0.00710706	0.00183625
LK4-E02	-0.0218377	0.00184064
LK4-E03	0.0135542	0.000825623
LK4-G05	-0.0783769	0.00163802
LK4-G06	0.0175364	0.00160863
LK4-G09	-0.050985	0.00144574
LK4-H03	0.0229614	0.00159377
LK4-H10	-0.0169095	0.00185217
LK4-H11	-0.0433498	0.00127756
LK4-H12	-0.0621433	0.00158355
LK5-A03	0.0309868	0.000399943
LK5-A04	0.0329544	0.00116154
LK5-A05	0.00667079	0.00167608
LK5-A07	0.0223189	0.000708336
LK5-B01	-0.0690969	0.00249495
LK5-B05	-0.0686475	0.000616874
LK5-B06	-0.0689153	0.00124726
LK5-B07	-0.126671	0.000467444
LK5-C01	-0.0355071	0.00129294
LK5-C03	-0.0348961	0.00112873
LK5-C04	0.05495	0.00288951
LK5-C11	-0.0789042	0.0019862
LK5-D03	0.0723678	0.00195525
LK5-D04	-0.00820194	0.00129816
LK5-D05	0.0397691	0.00729782
LK5-D08	0.0322398	0.00392163
LK5-D09	0.00368344	0.00386813
LK5-E01	-0.0898336	0.00158649
LK5-E08	-0.0666327	0.0185709
LK5-E09	-0.014934	0.00136936
LK5-F01	0.0290274	0.00176791
LK5-F03	-0.0613197	0.00250894
LK5-F07	0.0571711	0.00226405
LK5-F08	0.0150462	0.0117632
LK5-F10	-0.0926402	0.00342568
LK5-G01	-0.0974004	0.00367819
LK5-G03	-0.0613803	0.00210866
LK5-G09	0.000908654	0.000398768
LK5-H02	-0.0343068	0.00215802
LK5-H07	-0.0161483	0.00137125
LK5-H08	-0.000319424	0.0135206
LK5-H12	-0.0239195	0.00199299
LK6-A03	-0.071606	0.00312681
LK6-A05	0.00644622	0.00291105
LK6-A07	-0.0437328	0.000799239
LK6-A09	-0.118694	0.0063754
LK6-A10	-0.0878055	0.0139692
LK6-A11	-0.101157	0.00368696
LK6-B05	-0.00616437	0.000781425
LK6-B07	-0.016712	0.00151644
LK6-B09	-0.064913	0.000742145
LK6-B10	0.0297779	0.00137628
[truncated: 10 more rows]

## Sheet: BYxRM_s
Sample	Edge	s	stderr	num_cbcs	pval	bh_pval
[truncated: 11,751 more rows]

[truncated: 3 more sheets: vtn_modeling, vtn_modeling_clones, data_by_mutation]
