# Supplementary material for: Mutational robustness changes during long-term adaptation in laboratory budding yeast populations
Source: eLife. 2022 Jul 26;11:e76491. doi: 10.7554/eLife.76491 (PMC9355567; doi:10.7554/eLife.76491)
Supplement: Supplementary file 2. [file elife-76491-supp2.xlsx]

## Sheet: Sheet2
Purpose	Name	Sequence	Notes
First round barcode PCR	TnF1	TCGTCGGCAGCGTCAGATGTGTATAAGAGACAGNNNNNNNCCGTAACGTAGGTCTCTGACG
First round barcode PCR	TnF2	TCGTCGGCAGCGTCAGATGTGTATAAGAGACAGNNNNNNNTCCGTAACGTAGGTCTCTGACG
First round barcode PCR	TnF3	TCGTCGGCAGCGTCAGATGTGTATAAGAGACAGNNNNNNNTTCCGTAACGTAGGTCTCTGACG
First round barcode PCR	TnF4	TCGTCGGCAGCGTCAGATGTGTATAAGAGACAGNNNNNNNCAGCCGTAACGTAGGTCTCTGACG
First round barcode PCR	TnF5	TCGTCGGCAGCGTCAGATGTGTATAAGAGACAGNNNNNNNTGAGCCGTAACGTAGGTCTCTGACG
First round barcode PCR	TnF6	TCGTCGGCAGCGTCAGATGTGTATAAGAGACAGNNNNNNNGATAGCCGTAACGTAGGTCTCTGACG
First round barcode PCR	TnF7	TCGTCGGCAGCGTCAGATGTGTATAAGAGACAGNNNNNNNCTTACTCCGTAACGTAGGTCTCTGACG
First round barcode PCR	TnF8	TCGTCGGCAGCGTCAGATGTGTATAAGAGACAGNNNNNNNGCAGTAACCGTAACGTAGGTCTCTGACG
First round barcode PCR	TnF9	TCGTCGGCAGCGTCAGATGTGTATAAGAGACAGNNNNNNNATCTGGTTCCGTAACGTAGGTCTCTGACG
First round barcode PCR	TnF10	TCGTCGGCAGCGTCAGATGTGTATAAGAGACAGNNNNNNNAGGAACTGTCCGTAACGTAGGTCTCTGACG
First round barcode PCR	TnF11	TCGTCGGCAGCGTCAGATGTGTATAAGAGACAGNNNNNNNCAATTGGAGTCCGTAACGTAGGTCTCTGACG
First round barcode PCR	TnF12	TCGTCGGCAGCGTCAGATGTGTATAAGAGACAGNNNNNNNGGTATGTTCAACCGTAACGTAGGTCTCTGACG
First round barcode PCR	TnRS1	GTCTCGTGGGCTCGGAGATGTGTATAAGAGACAGTTGCTGATAAATCTGGAGCC
Barcoding	Tn_BC_Amp_Connectorator_2	CAAACTGGACAAAAAAGATCCGTAACGTAGGTCTCTGACGCNNNNCANNNNCANNNNCANNNNCANNNNttctacggggtctgacgc	This was used to construct barcoded plasmids - it was not technically used in this project, but this shows the barcode sequence, so we are still including it for clarity. For more details see Johnson et al. 2019 (Biorxiv link to preprint SI in case: https://www.biorxiv.org/content/10.1101/675314v1.supplementary-material)
