# Supplementary figures and images for: Mutational robustness changes during long-term adaptation in laboratory budding yeast populations
Source: eLife journal article supplement (doi:10.7554/elife.76491), 2022-07-26

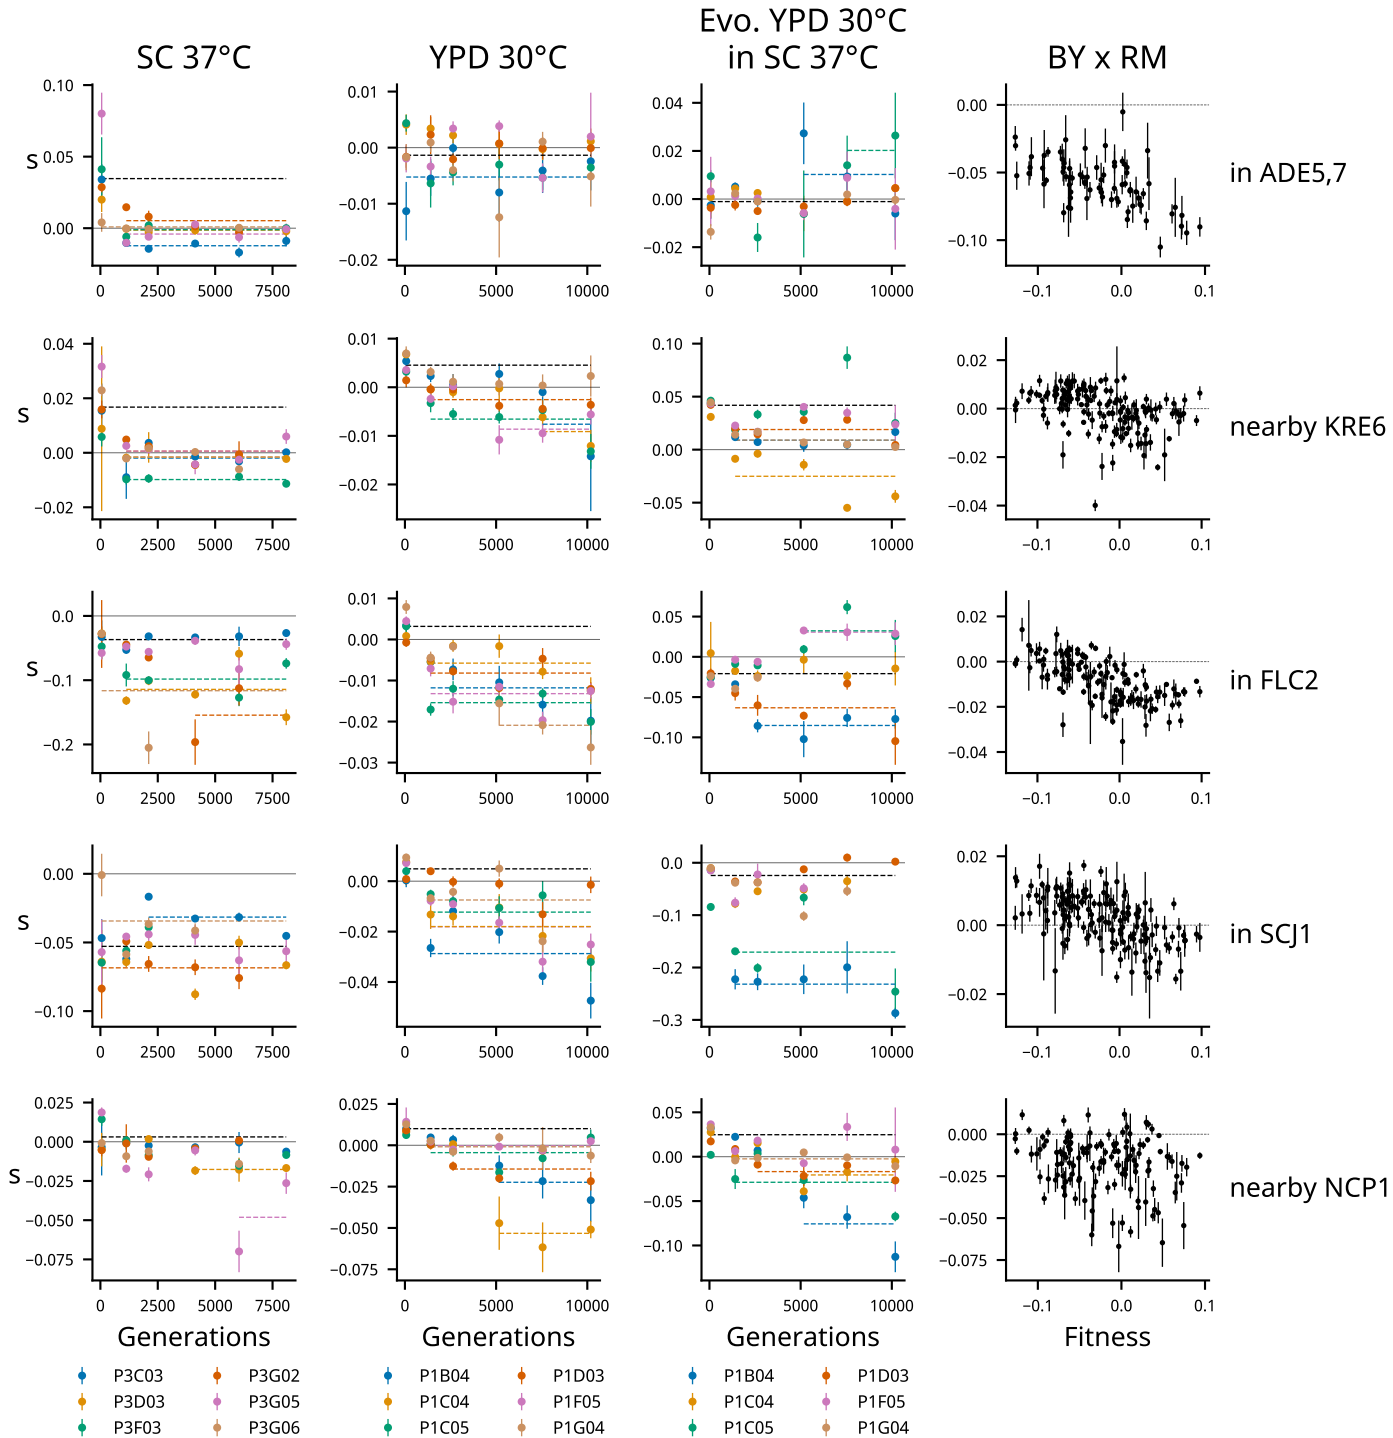

Supplement: supp [file elife-76491-supp-v1.zip]

SC 37°C

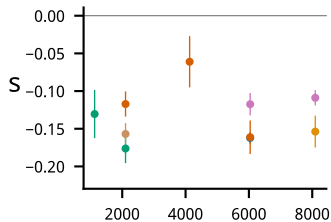

YPD 30°C

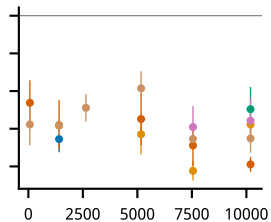Evo. YPD 30°C  
in SC 37°C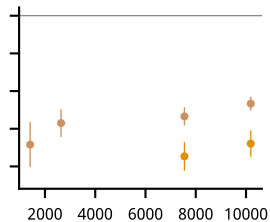

BY x RM

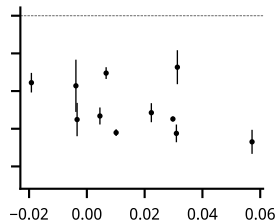

nearby YOL085W-A

Supplement: supp [file elife-76491-supp-v1.zip]

A

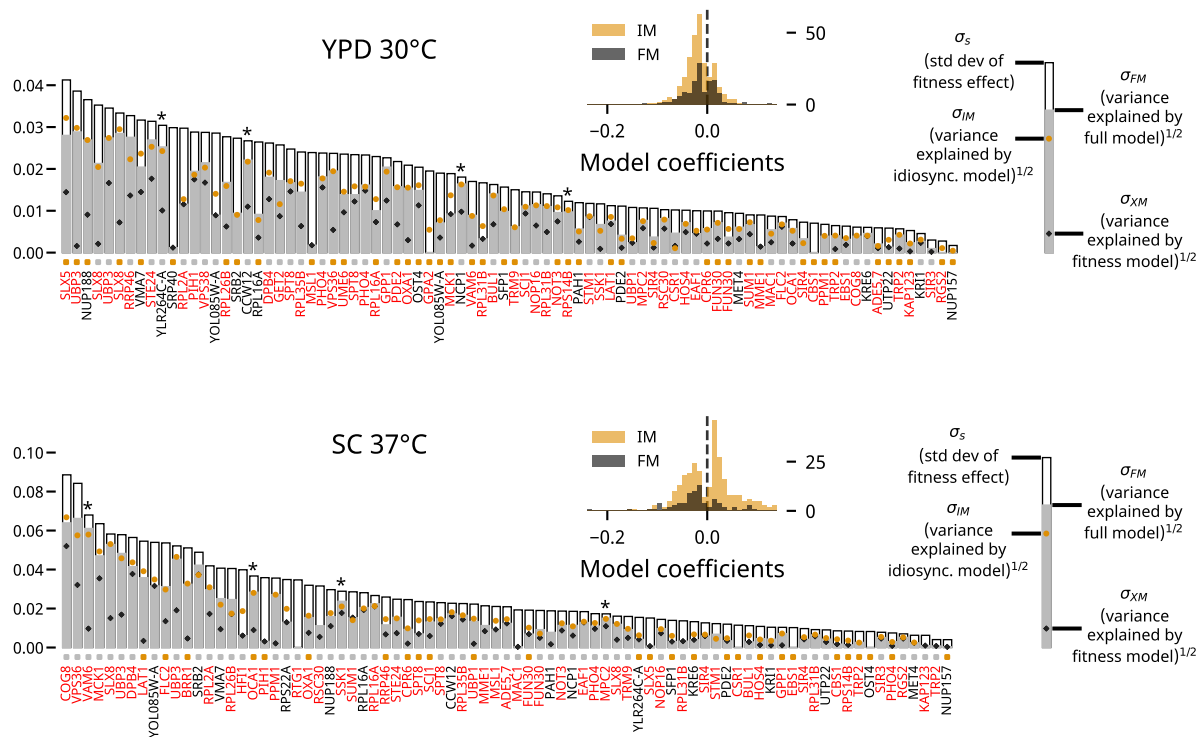

B

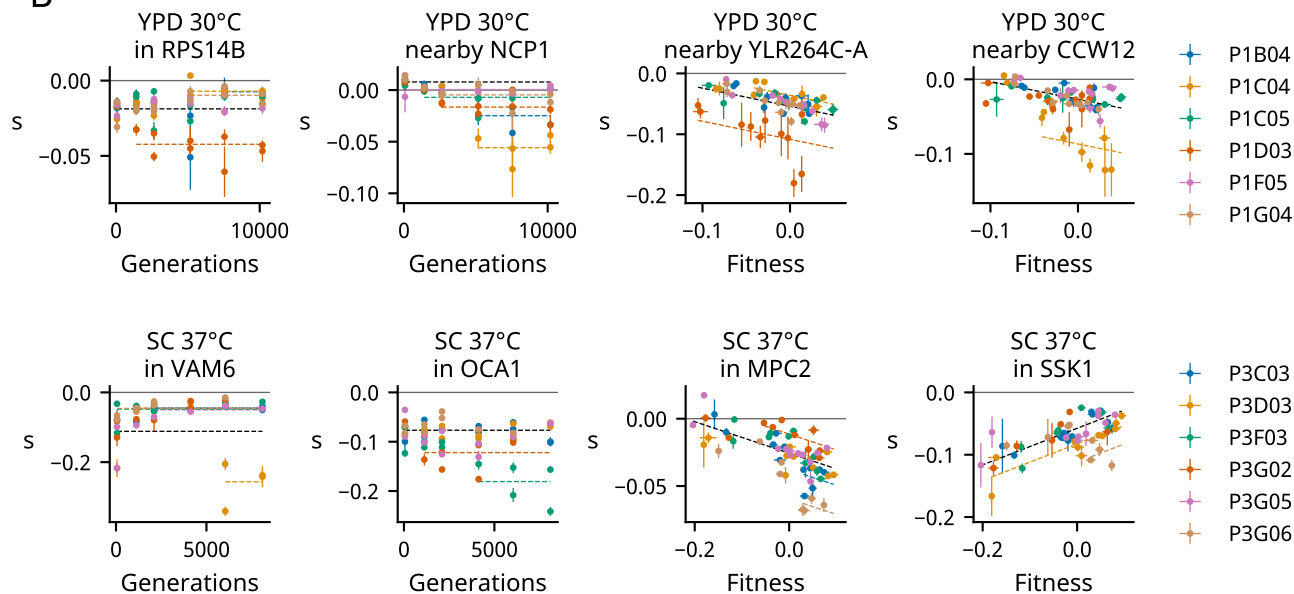

Supplement: supp [file elife-76491-supp-v1.zip]

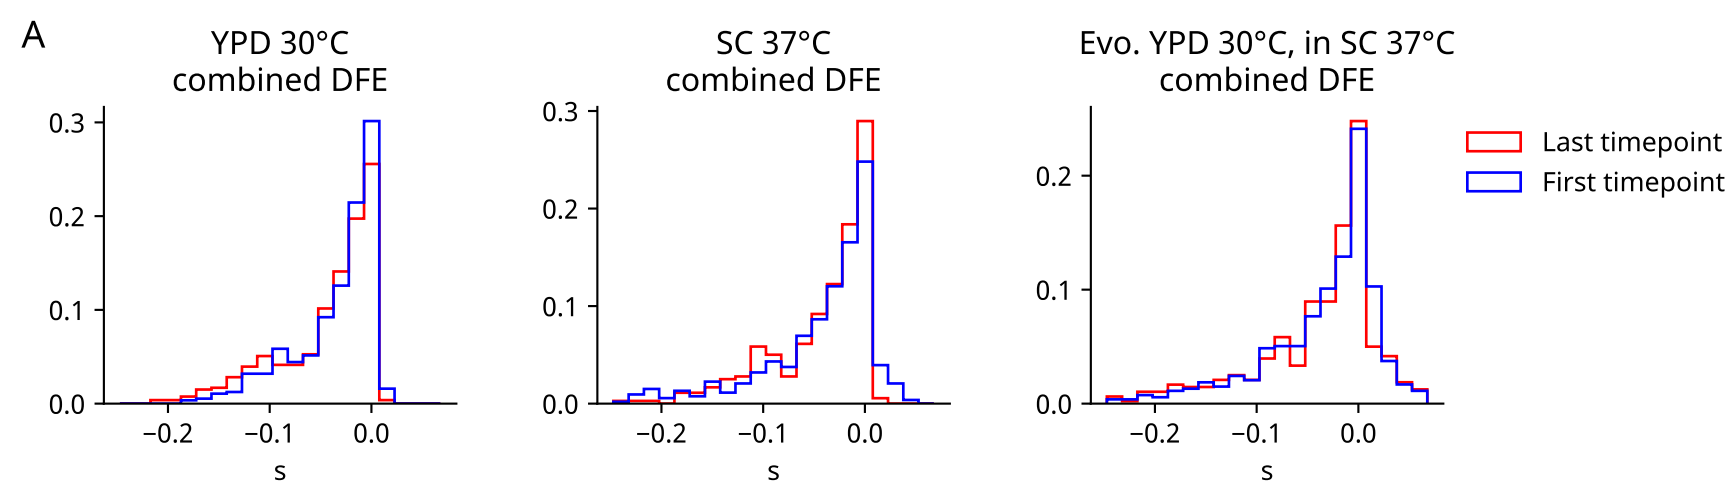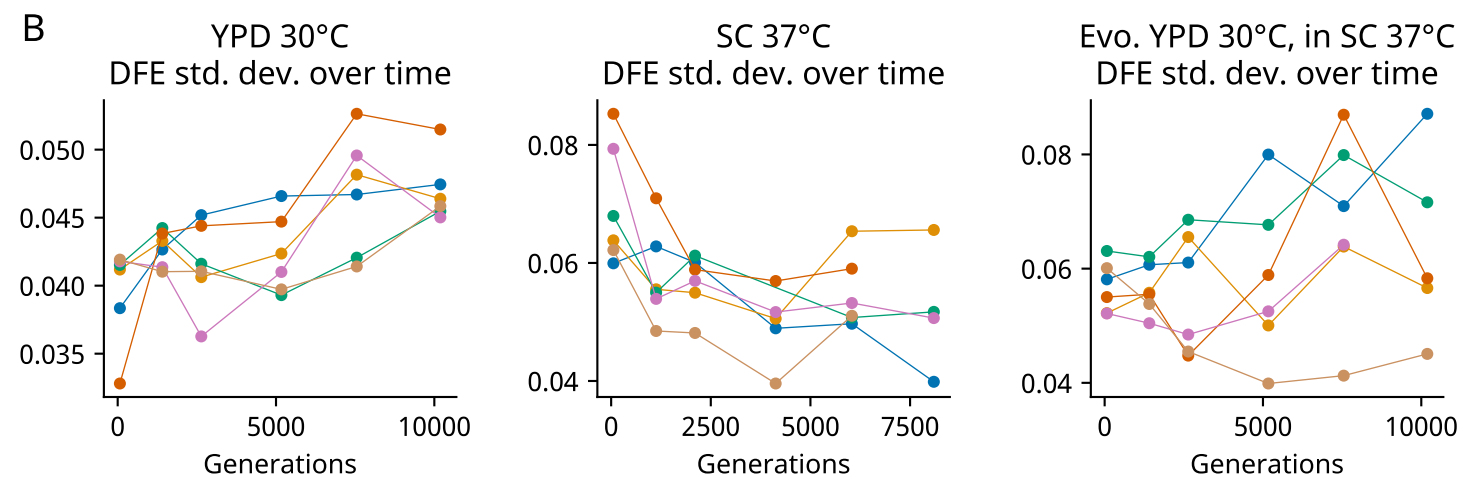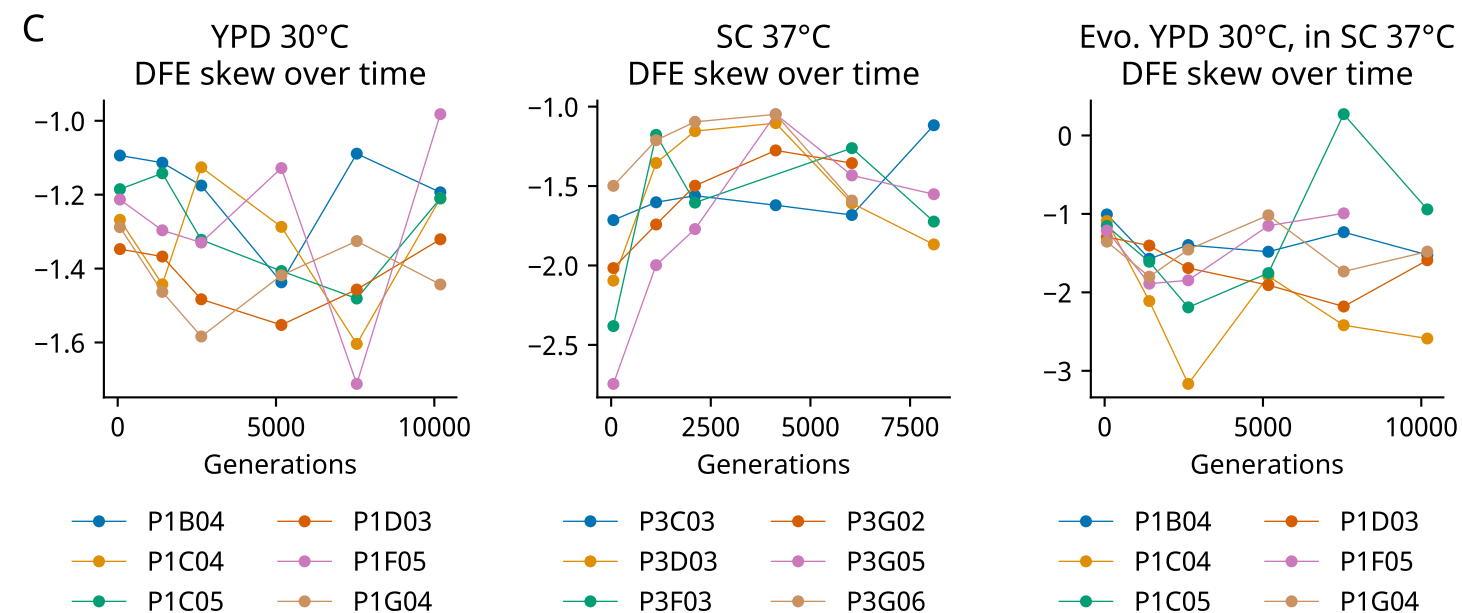

Supplement: supp [file elife-76491-supp-v1.zip]

Evo. YPD 30°C, in SC 37°C

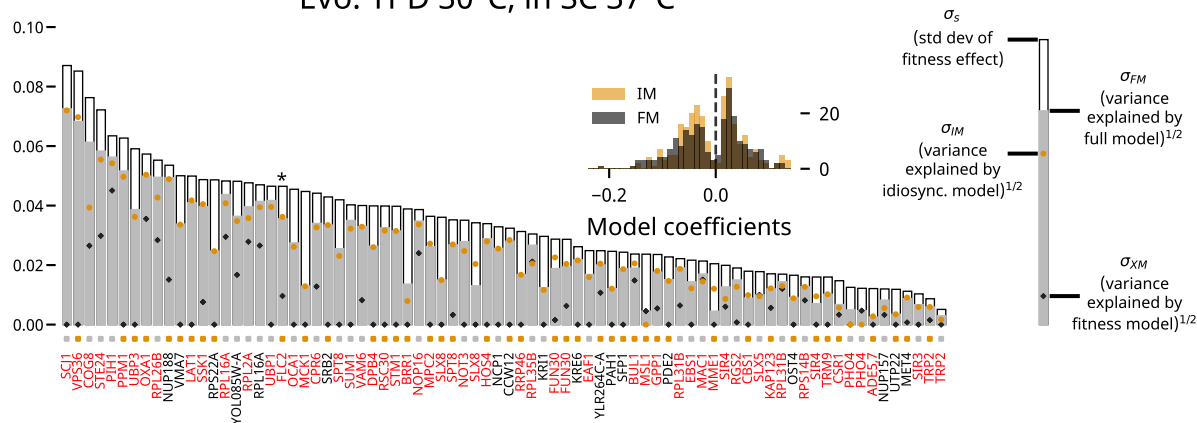

B

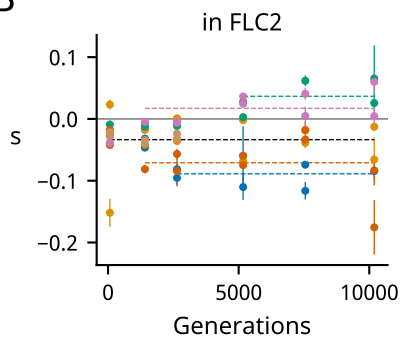

C

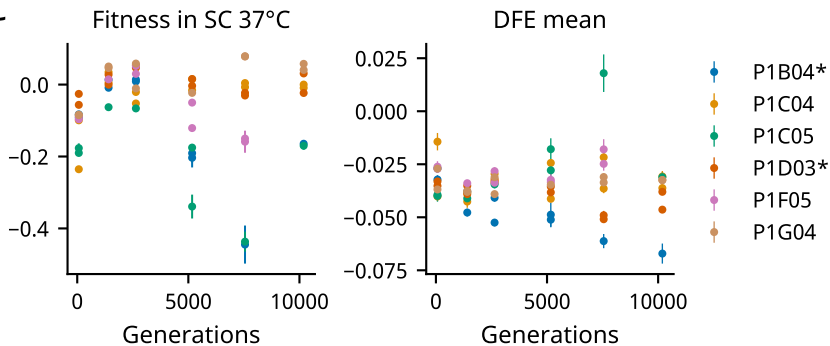

Supplement: supp [file elife-76491-supp-v1.zip]

SC 37°C

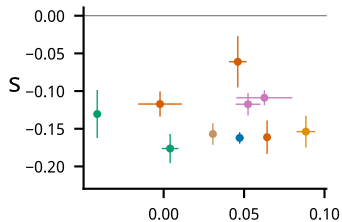

YPD 30°C

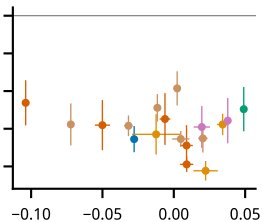Evo. YPD 30°C  
in SC 37°C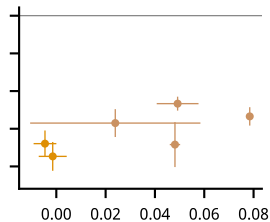

BY x RM

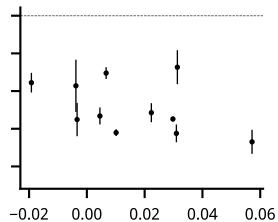

nearby YOL085W-A

Supplement: supp [file elife-76491-supp-v1.zip]

SC 37°C

YPD 30°C

Evo. YPD 30°C  
in SC 37°C

BY x RM

in RPS14B

in RRP46

in RSC30

in RTG1

in SCJ1

in SIR3

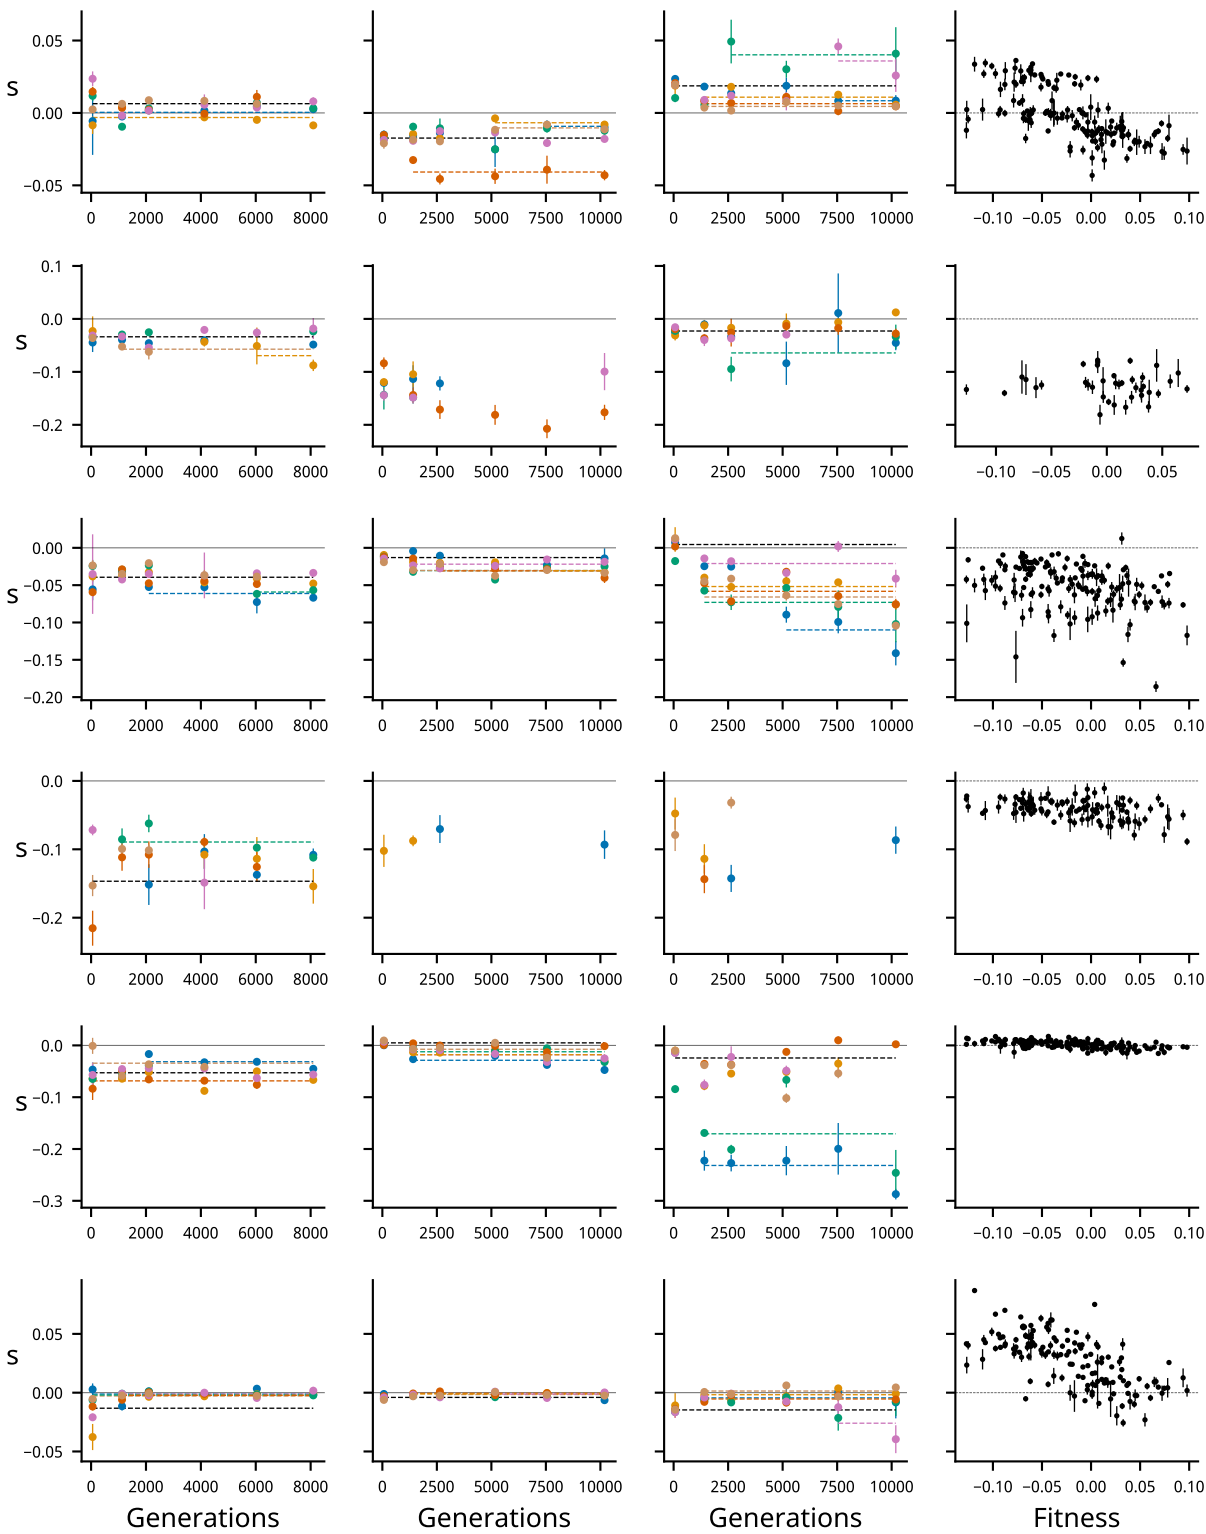

Supplement: supp [file elife-76491-supp-v1.zip]

# Evo. YPD 30°C, in SC 37°C

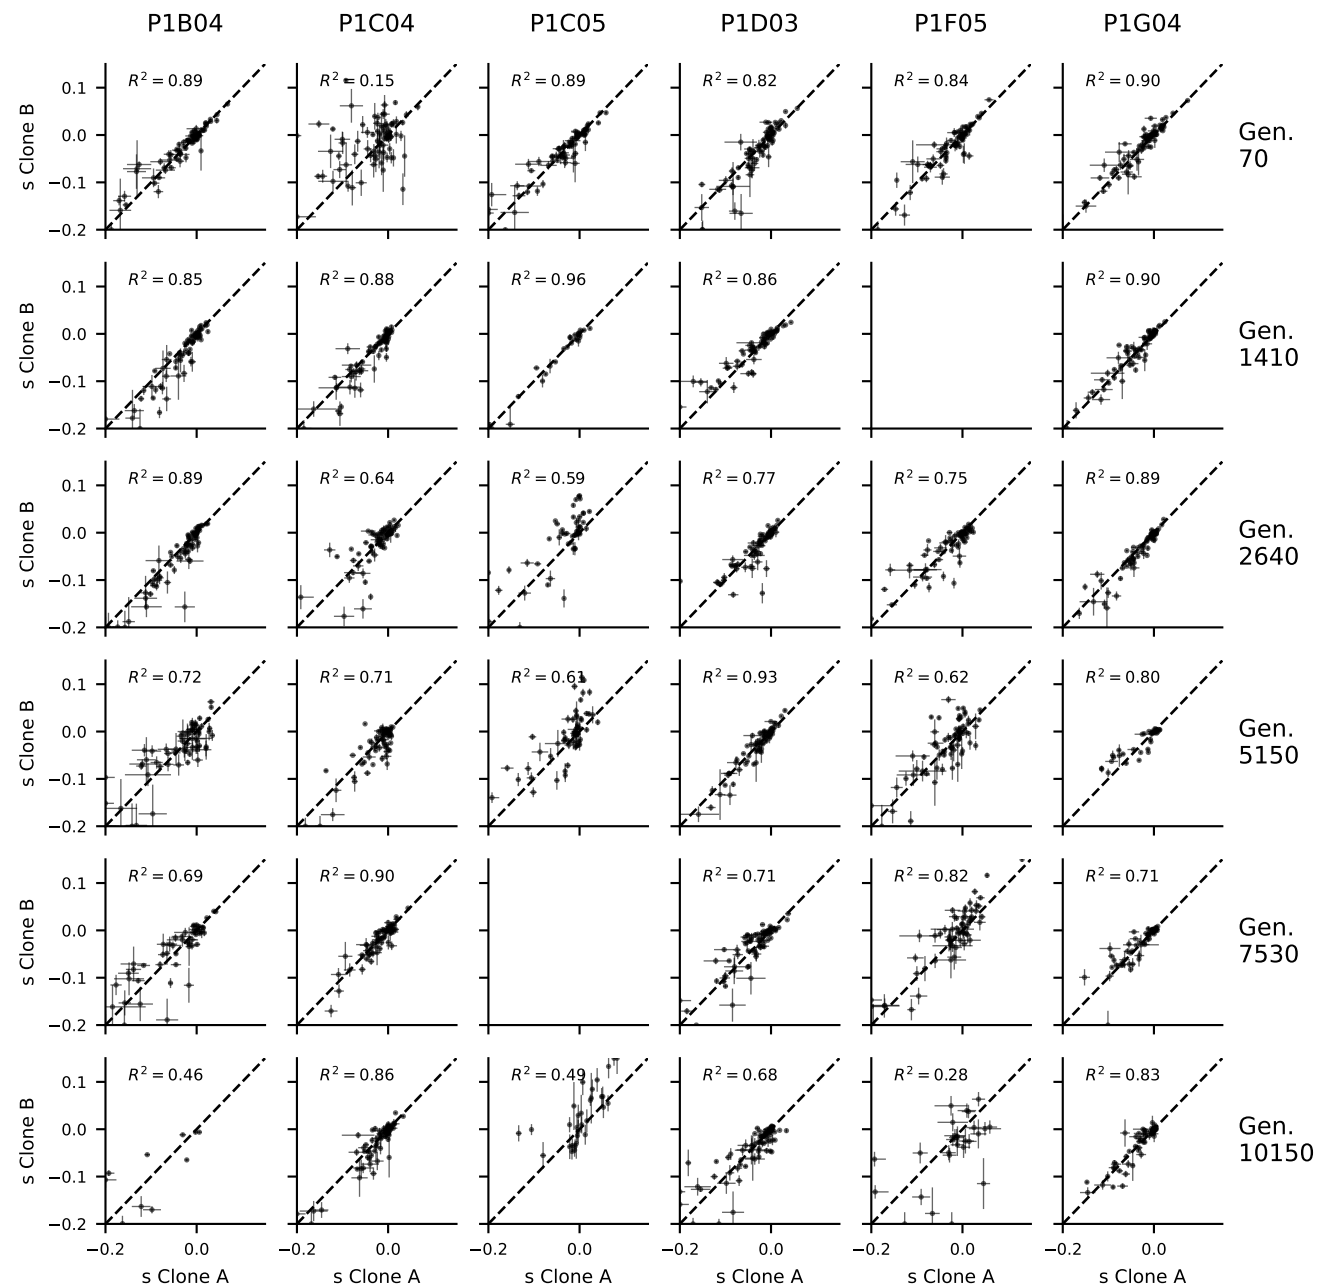

Supplement: supp [file elife-76491-supp-v1.zip]

# SC 37°C

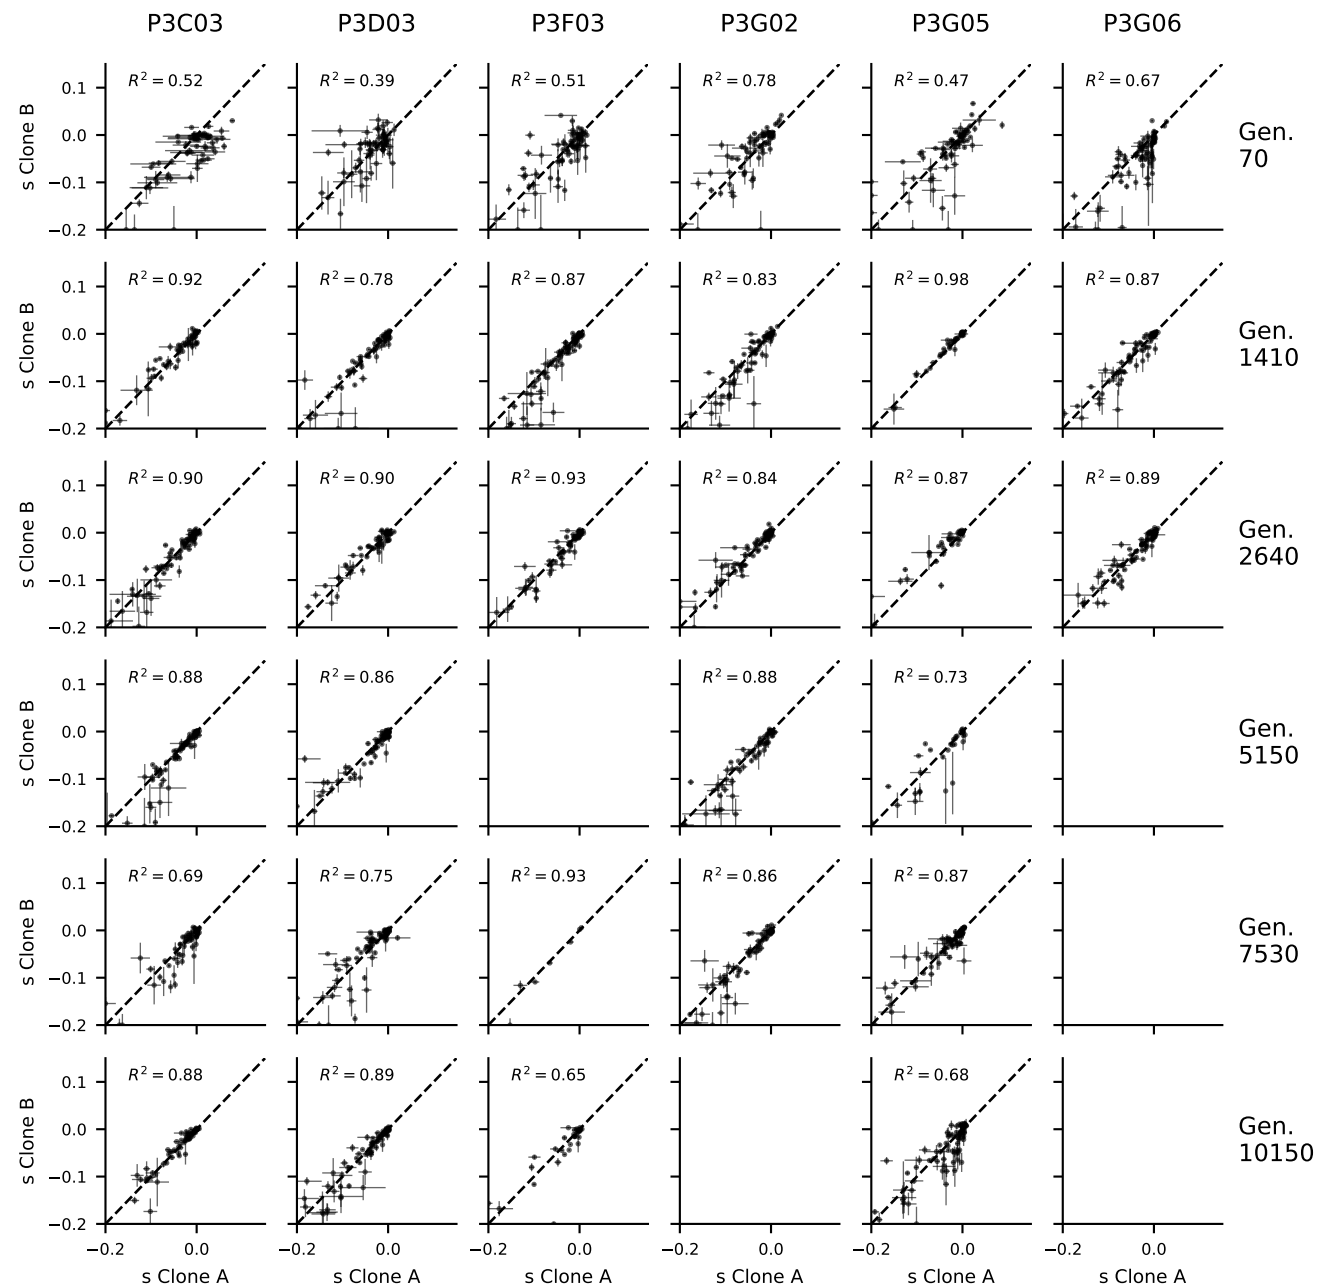

Supplement: supp [file elife-76491-supp-v1.zip]

# YPD 30°C

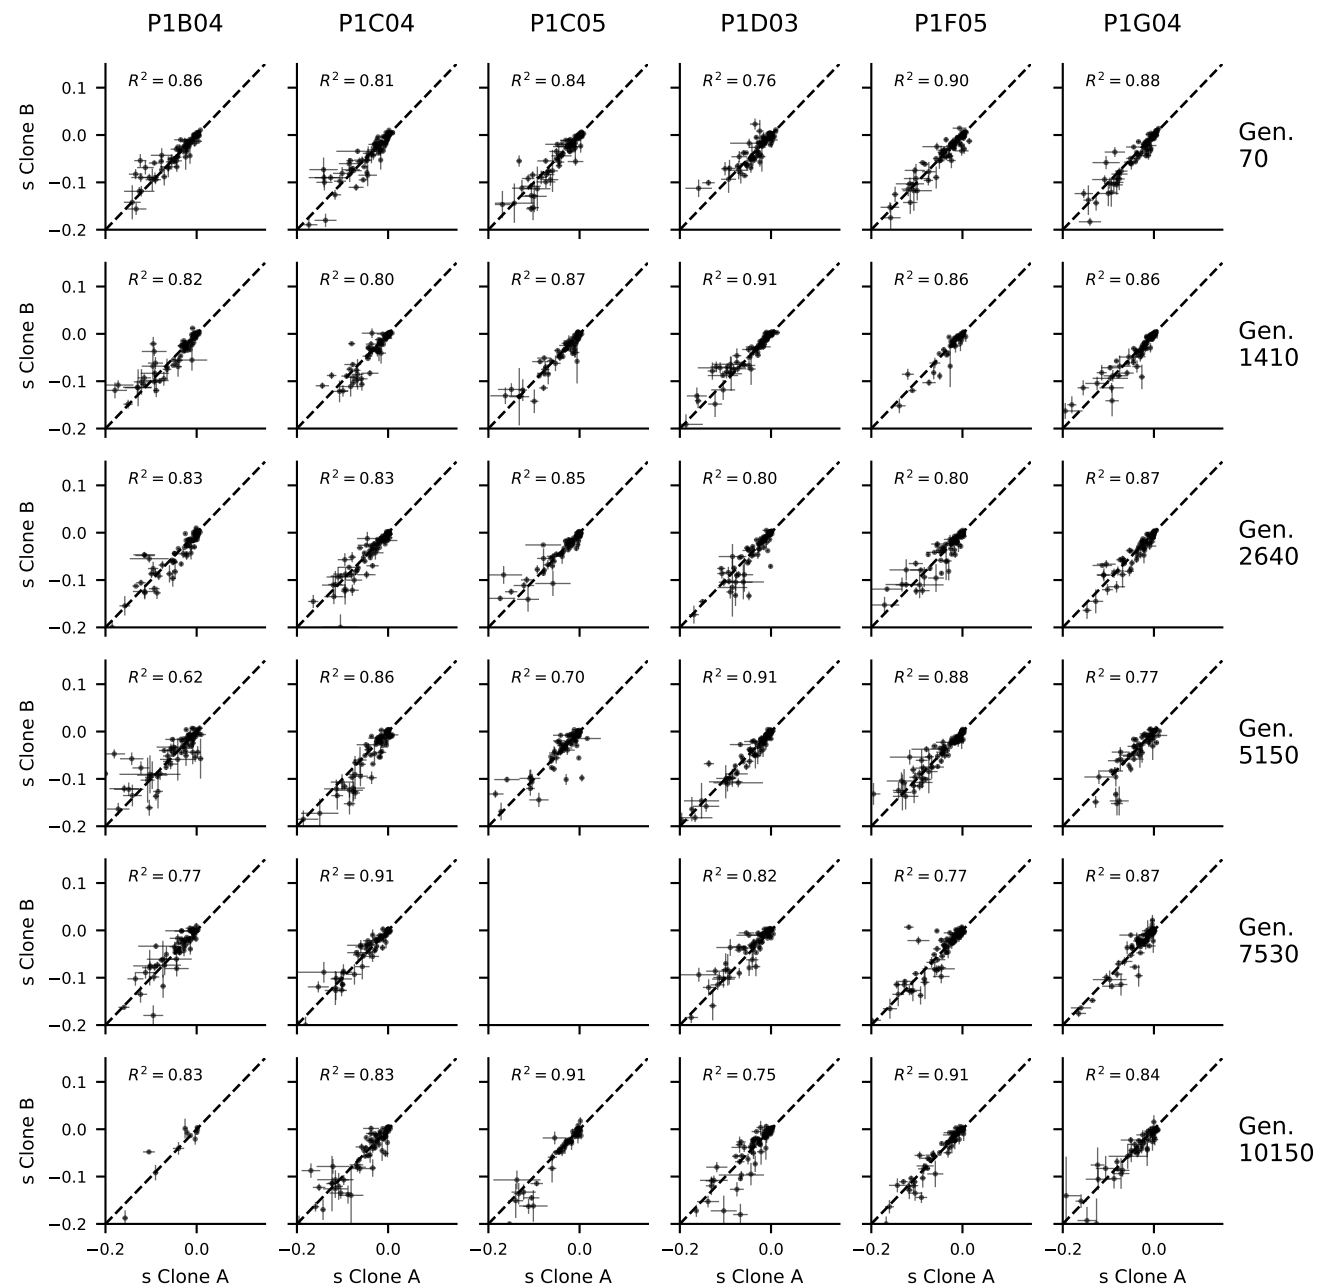

Supplement: supp [file elife-76491-supp-v1.zip]

YPD 30°C

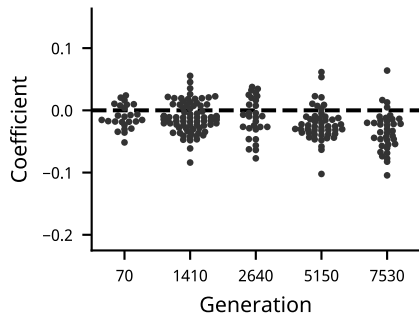

Evo. YPD 30°C, in SC 37°C

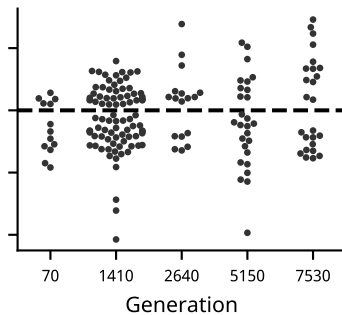

SC 37°C

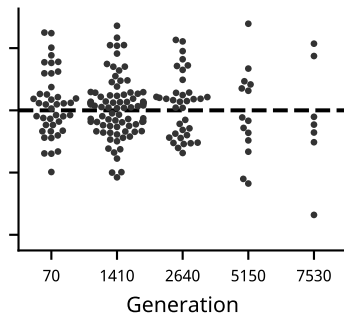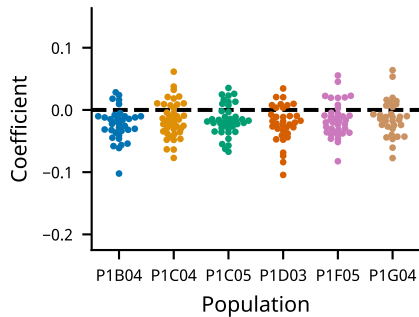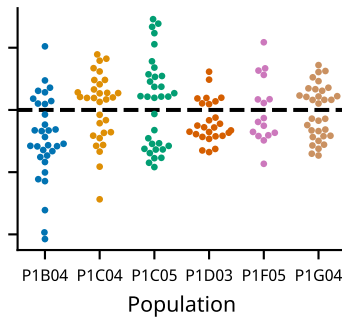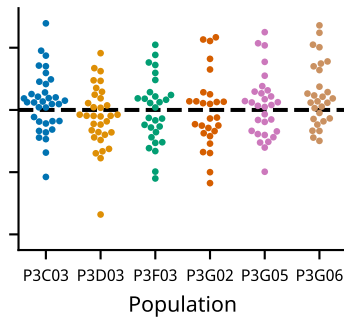

Supplement: supp [file elife-76491-supp-v1.zip]
